# Supplementary material for: Altered Plasma, Urine, and Tissue Profiles of Sulfatides and Sphingomyelins in Patients with Renal Cell Carcinoma
Source: Cancers (Basel). 2022 Sep 23;14(19):4622. doi: 10.3390/cancers14194622 (PMC9563753; doi:10.3390/cancers14194622)
Supplement: Supplementary file 1 [file cancers-14-04622-s001.zip]

Archive with 4 entries (4 files):
- cancers-1894222-supplementary/Supplementary_Data_S1_Cancers.xlsm
- cancers-1894222-supplementary/Supplementary_Data_S2_Cancers.xlsm
- cancers-1894222-supplementary/Supplementary_Data_S3__Cancers.pdf
- cancers-1894222-supplementary/Supplementary_FIGURES_S1-S7.pdf
