# Supplementary material for: Altered Plasma, Urine, and Tissue Profiles of Sulfatides and Sphingomyelins in Patients with Renal Cell Carcinoma
Source: Cancers (Basel). 2022 Sep 23;14(19):4622. doi: 10.3390/cancers14194622 (PMC9563753; doi:10.3390/cancers14194622)
Supplement: Supplementary file 1 [file cancers-14-04622-s001.zip › cancers-1894222-supplementary/Supplementary_Data_S1_Cancers.xlsm]

## Sheet: Table of contents
Supplementary Data S1. Clinical data together with raw intensities, relative and molar concentrations of individual lipids measured in studied plasma, urine, and tissue samples of RCC patients and healthy controls
Table of contents
Data S1A	Clinical data together with raw intensities of individual lipids measured in plasma samples
Data S1B	Clinical data together with raw intensities of individual lipids measured in urine samples
Data S1C	Clinical data together with raw intensities of individual lipids measured in tissue samples
Data 1D	Clinical data together with relative concentrations of individual lipids measured in plasma samples
Data S1E	Clinical data together with relative concentrations of individual lipids measured in urine samples
Data S1F	Clinical data together with relative concentrations of individual lipids measured in tissue samples
Data S1G	Clinical data together with molar concentrations of individual lipids measured in plasma samples
Data S1H	Clinical data together with molar concentrations of individual lipids measured in urine samples
Data S1I	Clinical data together with Intensities of individual lipids normalized to internal standard in tissue samples

## Sheet: Data S1A
Data S1A. Clinical data together with raw intensities of individual lipids measured in plasma samples (zero values were replaced by 8000). Explanation of abbreviations is as follows: N - controls, T - RCC patients, UNK - unknown, QC - quality control, M - males, F - females, ccRCC - clear cell renal cell carcinoma, papRCC - papillary renal cell carcinoma, chRCC - chromosome renal cell carcinoma, …
Sample code	State	gender	Measured types of samples (P = plasma, U = urine, T= tissue)	Age	BMI	Type of tumor	Tumor stage	Tumor grade	NM code	SM 32:1;O2	SM 33:1;O2	SM 34:2;O2	SM 34:1;O2	SM 34:0;O2	SM 35:1;O2	SM 36:2;O2	SM 36:1;O2	SM 36:0;O2	SM 37:1;O2	SM 38:2;O2	SM 38:1;O2	SM 39:1;O2	SM 40:3;O2	SM 40:2;O2	SM 40:1;O2	SM 41:3;O2	SM 41:2;O2	SM 41:1;O2	SM 42:3;O2	SM 42:2;O2	SM 42:1;O2	SM 43:2;O2	SM 43:1;O2	SM 18:1;O2/12:0	SHexCer IS 18:1;O2/12:0	SHexCer 34:2;O2	SHexCer 34:1;O2	SHexCer 34:2;O3	SHexCer 34:1;O3	SHexCer 34:0;O3	SHexCer 36:1;O2	SHexCer 40:2;O2	SHexCer 40:1;O2	SHexCer 41:2;O2	SHexCer 40:2;O3	SHexCer 41:1;O2	SHexCer 40:1;O3	SHexCer 40:0;O3	SHexCer 42:3;O2
Inclusion criterion 1										include	include	include	include	include	include	include	include	include	include	include	include	include	include	include	include	include	include	include	include	include	include	include	include	IS	IS	exclude	include	include	include	include	exclude	exclude	include	exclude	include	exclude	include	exclude	include
Inclusion criterion 2										include	include	include	include	include	include	include	include	include	include	include	include	include	exclude	include	include	exclude	include	include	include	include	include	include	exclude	IS	IS	include	include	exclude	include	exclude	exclude	include	include	exclude	include	exclude	include	exclude	include
NCS_001	N	M	PU	50.3	UNK	-	-	-	-	182605	117986	196557	3.75186e+06	161939	140000	125000	591974	26025.9	67300	99800	371074	94860.6	8000	325091	853412	14376.3	162016	328680	358985	1.3953e+06	591580	44308.6	8600.57	712623	162715	11308.3	344664	60364.6	627545	64669	8000	13714.2	62943.6	8000	37273.2	12538.7	179304	8000	32502.4
NCS_002	N	F	PU	61.3	UNK	-	-	-	-	255675	155976	328686	3.63416e+06	140233	146000	229000	731486	35988.2	89000	162000	466647	167894	27157	524411	834722	27312.1	250827	363231	576995	1.3017e+06	503000	45881.2	8531.61	709794	182978	42379.2	441772	86193.9	688717	48000	8000	34063.1	97443.7	8000	37511.9	39640.6	173713	8000	34431.8
NCS_003	N	F	PU	48.8	UNK	-	-	-	-	181164	113310	186959	2.24883e+06	90726.7	95400	128000	412025	8000	52700	82300	284228	98913.4	8000	294543	540718	9271.39	158836	253993	297439	728585	322893	35529.2	8115.69	793931	151737	8860.4	262172	19960	322483	25780.6	8000	8000	60059.9	8000	10681.6	33333.3	94879.6	8000	16086.7
NCS_004	N	F	PU	47.6	UNK	-	-	-	-	258866	203568	361600	4.52074e+06	185658	134000	249446	770764	21300	87700	167000	528798	178381	17386.1	602937	1.03182e+06	21405.5	314790	451258	582484	1.59631e+06	647934	56786.1	13980.6	668842	97498.1	28193.1	379367	53186.5	508861	41378.9	8000	38942.8	78571.9	9972.26	33387.3	31072.3	110192	8000	46591.2
NCS_005	N	F	PU	56.9	UNK	-	-	-	-	218434	146709	332132	3.35701e+06	123799	122000	194000	605911	23440.3	73200	125000	388246	121312	12244.3	435615	752507	24363.7	214258	319210	501011	1.42556e+06	481119	44542.8	8000	740228	151515	38868.3	366668	61950.6	511873	30200	8000	29884.6	75671.4	8000	46316.6	27000	137871	8000	26315.4
NCS_006	N	F	PU	59.9	25.39	-	-	-	-	220447	131221	378858	4.54336e+06	171309	172000	255000	864524	40553.8	100000	176000	551275	170335	31136.7	563240	1.03523e+06	63308.6	273739	454294	658840	1.94883e+06	621105	65213	9187.81	593207	108170	10461.1	292566	57136.8	638541	46000	8000	9772.36	51691.8	8000	29393	8000	144671	8000	18780.8
NCS_007	N	F	PU	42.5	UNK	-	-	-	-	323035	217135	383521	5.07605e+06	246951	161000	266000	869193	29014.8	104000	241000	676006	232244	52260.5	741764	1.24343e+06	53548	400184	581471	867884	2.37524e+06	781326	96308.5	19772.8	937682	115686	16539	261910	99908.8	711803	50000	8282.67	34016.5	47146.7	8000	49800.9	19648.6	142826	8000	54028.3
NCS_008	N	F	PU	53.4	UNK	-	-	-	-	444903	309891	669170	8.0839e+06	270880	280000	435000	1.24842e+06	56008.2	143000	346000	957221	304184	77557.9	1.22799e+06	1.86645e+06	103748	604706	728085	1.50365e+06	3.98107e+06	1.24657e+06	160204	47063.6	969298	106382	42194.5	450144	127223	985093	72800	8000	50663.2	84500.4	20198	81799.5	26400	221136	8000	92748.5
NCS_009	N	F	PU	58	UNK	-	-	-	-	255949	168902	434998	4.03449e+06	135295	190000	369651	846908	26500	118000	242000	488182	139759	64159.8	650766	760346	90641.6	324556	341771	914432	2.05147e+06	509121	140294	21525.3	1.06341e+06	120419	8822.45	198326	25627.8	214790	14200	8000	9763.52	25475.4	8000	8000	8000	26321	8000	17560.2
NCS_010	N	F	PU	68.3	UNK	-	-	-	-	212956	121757	148399	3.37451e+06	116768	127000	8000	459207	8000	45900	54600	263250	85275.5	8000	229469	494785	15995.3	119473	243015	289293	821463	349678	21227.1	8000	386393	88459.2	11914.2	298116	42961.4	580548	43600	8000	8000	15967	8000	8362.33	8000	65909.4	8000	16869.7
NCS_011	N	M	PU	53.6	27.5	-	-	-	-	132078	52572.5	50016	1.49295e+06	60814.1	60800	46100	371355	14637.6	46000	32800	244742	79549	8000	104193	413528	8000	39707.2	182634	91614.5	282067	264908	8000	8000	520906	119821	8000	111317	9874.02	310190	14200	8000	8000	9570.9	8000	8000	8000	73583.7	8000	8000
NCS_012	N	F	PU	39.4	28	-	-	-	-	142457	66967.8	129907	2.00025e+06	76560.7	62300	86800	418727	15741.9	46900	52400	255380	62883	8000	230595	538804	8000	80633.5	190469	267072	575849	352477	8000	8000	510876	140132	8200.5	218547	25845.7	416015	9000	8000	12903.8	39683.7	8000	9511.87	8000	104869	8000	14833.3
NCS_013	N	M	PU	33.4	29.63	-	-	-	-	170150	110107	148664	3.31092e+06	137719	117000	89600	510114	11900	74200	74000	376074	106077	8000	257817	767908	8000	108817	278490	279280	805087	543119	13266.1	8000	547957	126732	8806.74	321358	50354.7	620205	45000	8000	12414.6	80286.2	8000	30906.4	17816.4	176309	8000	26411.3
NCS_014	N	M	PU	54.6	26.79	-	-	-	-	199735	119301	69202.4	3.08849e+06	153149	114000	51000	557167	23902.2	67300	37500	430007	137346	8000	171824	790916	8000	82945.2	326426	152325	519249	475308	10627.3	9187.86	672833	129954	8000	190511	13447.9	480906	38388.3	8000	8000	32753.4	8000	8000	8000	133508	8000	8000
NCS_015	N	F	PU	54.8	26.5	-	-	-	-	299883	177229	195479	3.722e+06	158478	162000	162000	784237	31827.1	100000	100000	484399	202619	12458.4	394574	1.01987e+06	15434.8	187505	450476	340080	934559	606144	38215.3	17334.2	466554	95806.4	8000	295734	28984.2	458180	53000	8000	16047.5	60311.2	8000	12189.5	23785.6	132677	8000	21725
NCS_016	N	M	PU	48.9	30.42	-	-	-	-	257757	137689	270796	3.95868e+06	154452	148000	201000	835317	58529.1	96000	151000	561846	175445	30559.4	542658	1.11887e+06	27665.4	218920	422476	544555	1.54225e+06	749078	64867	26382.9	766976	107488	8000	196268	30045	398331	20700	8000	11000	33910.3	8000	9626.82	14200	93801	8000	9589.16
NCS_017	N	F	PU	47.1	38	-	-	-	-	276635	152436	323587	3.6018e+06	151179	150000	251703	856681	58228.7	97900	158000	501087	157677	31460.6	498437	986744	37225	235193	415129	502137	1.44901e+06	624532	65731.1	18608.2	473530	81834	33444	312486	71636.9	620639	48300	8000	20482.9	57892	8000	41874.7	26800	145214	8000	17941.8
NCS_018	N	M	PU	60.6	29.06	-	-	-	-	205024	126203	245506	2.94668e+06	107137	128000	213000	690201	28000	79600	160000	477964	164919	24679.4	489486	784456	23240.1	230376	342152	437667	1.1866e+06	451964	56114.8	11843.9	933209	86375.6	8000	197230	19014.7	376269	18000	8000	13200	36928	8000	25115.5	8000	122092	8000	8642.47
NCS_019	N	F	PU	52.7	28	-	-	-	-	634299	367439	447192	6.09279e+06	246783	379000	281000	1.12247e+06	55277.9	217000	271000	953628	409920	99343.9	1.0563e+06	1.46843e+06	146566	537126	717473	941220	2.56873e+06	905874	189493	69688.4	760908	187308	55080.8	654901	131105	1.28716e+06	127000	22000	50932.4	134985	39400	98529.3	63963	308658	21400	78602.5
NCS_020	N	F	PU	57.3	22.1	-	-	-	-	342503	220531	351279	4.68799e+06	183963	174000	214000	655876	16600	93000	152000	452070	198637	35715.1	620903	968555	39560.2	332413	475814	691404	1.70864e+06	637706	104350	28628.1	630039	106879	34373.3	581165	89735.9	911372	70000	13400	47350.4	103101	15900	52461.5	56464.5	221771	11300	57505.9
NCS_021	N	F	PU	55.3	27.4	-	-	-	-	457044	293210	460804	5.13638e+06	164383	220000	327000	917442	25600	127000	231000	637318	246175	51521.2	757177	1.07343e+06	60864.2	374291	484558	683350	1.64191e+06	614808	89970.3	21532.5	455167	103268	76596	700912	135284	924787	62600	21600	59790	133655	25168.1	105612	52607.6	280274	12500	63772
NCS_022	N	M	PU	38.6	28.98	-	-	-	-	305960	158566	256897	3.54048e+06	127859	136000	160000	629019	23743.3	84000	112000	547431	195660	19000	550155	944112	22209.3	234852	387929	429183	1.58187e+06	608851	79506.7	20057.1	698890	113807	14005.1	365861	36249.9	626698	54100	8000	16229.5	74535.9	8000	34858.1	21078	194286	8200	18615.7
NCS_023	N	M	PU	58.5	35.19	-	-	-	-	177457	111218	218460	3.02536e+06	106658	91600	135275	531544	10100	55000	104000	408403	107450	8000	318797	579180	9347.36	155101	247125	289378	1.09353e+06	384041	52124.8	8000	1.04939e+06	153612	44836.4	471755	72989.1	698425	52200	8000	12797.7	60406.1	8000	40868.1	16639.9	138297	8000	13272.3
NCS_024	N	F	PU	34.2	24	-	-	-	-	387706	262269	397281	5.22682e+06	207259	201000	296888	970672	43483.9	127000	178000	633755	245611	33045.2	615280	1.13467e+06	36488.7	330418	548361	537746	1.57093e+06	664977	85710.5	24715.6	793253	123162	15521.2	365460	45726.1	735848	65800	12300	22600.7	82974.8	8000	30797.4	38775.1	206265	9000	21098.5
NCS_025	N	F	PU	53.7	31.64	-	-	-	-	176836	111194	341252	3.49551e+06	159036	112000	228056	611296	38622.3	82900	153000	387067	100364	16000	430596	806723	24707.6	201324	321995	565819	1.64704e+06	544864	60619.9	10734.8	508159	84991.3	8000	183564	12047.8	334904	14500	8000	10422.1	32628.2	8000	15000	8000	110972	8000	11330.7
NCS_026	N	F	PU	54.5	38.2	-	-	-	-	215526	178822	325530	4.59708e+06	160086	189000	236000	771731	19529.8	110000	177000	454633	154327	40800	510671	937865	44673.7	276312	406618	639828	1.84891e+06	611475	103325	17985.1	346963	47329.1	18373	355463	51979.8	704369	36000	16600	19012.9	76013.8	8000	28200	16727.5	157364	8000	41016.5
NCS_027	N	F	PU	37.3	26.23	-	-	-	-	289111	199183	409105	4.54837e+06	151253	165000	275000	859685	43627.5	117000	229000	662043	194051	40297.9	721153	1.08625e+06	52855	305431	410651	711468	1.8795e+06	599068	74145.2	11190.1	817515	109234	8000	161951	45802.1	416398	8000	8000	16800	25857	8000	38037.5	8000	115426	8000	13782.4
NCS_028	N	M	PU	52	UNK	-	-	-	-	227652	159225	310142	4.35676e+06	131400	155000	225222	837329	41679.8	97000	170000	519032	162060	14500	565331	950451	32596.2	252659	391058	567268	1.91511e+06	615549	89126.3	15023.2	1.03921e+06	155023	18591.5	279721	50164.8	507115	20900	8000	12538.9	63799	8000	46261	17078	188037	8000	20733.2
NCS_029	N	F	PU	59.1	UNK	-	-	-	-	231901	128014	284071	4.09833e+06	189201	140000	201013	714239	33918	75500	136000	434470	116971	15118.8	450416	859493	28627.1	198766	344141	531057	1.81159e+06	638354	71716.9	13365.5	515577	109433	8122.69	369588	50518.5	607194	60000	8000	10200	75348.8	8000	24766.9	33866.9	155624	8000	36546.8
NCS_030	N	F	PU	56.2	29.41	-	-	-	-	278159	163784	331945	3.75813e+06	125636	135000	217000	685130	20000	104000	161000	467741	171587	20000	493478	906295	27988.8	237015	387561	440366	1.31204e+06	483032	54794.4	8393.08	753607	133451	38457.4	365329	119262	982177	76700	8000	30747	88617.4	8000	94273.6	27213.5	284292	8000	22002
NCS_031	N	M	PU	58.7	25.9	-	-	-	-	277167	183676	318590	4.17776e+06	141712	134000	179509	632880	12656.6	78800	135000	442249	155718	29195.5	487601	846913	21070.9	228749	354664	492887	1.39382e+06	590030	64314.9	18494.2	939556	96978.2	8000	187967	19688.4	195292	8800	8000	8000	26339.1	8000	8000	8000	39367.5	8000	11043.8
NCS_032	N	M	PU	46.6	32.6	-	-	-	-	378457	237185	464829	5.86924e+06	212738	217000	319177	1.08584e+06	53741.6	143000	225000	711607	247178	45100	812530	1.37162e+06	49807.6	390711	628116	795552	2.44563e+06	922697	140461	53779.8	695293	93819	14162.5	380308	39004.5	584297	33900	13000	30050.4	90343.8	11427.8	37759.4	42095.8	194214	8000	39785.5
NCS_033	N	M	PU	43.5	23	-	-	-	-	365039	266174	470916	5.96417e+06	186553	235000	344408	1.09014e+06	36700	121000	226000	715011	239503	57043.2	787019	1.26789e+06	57754.8	384884	579602	805776	2.30893e+06	853704	125457	52937.3	794720	114011	64437.4	508450	119033	979582	63000	27000	85593.5	118097	24334.6	96846.6	40460.8	272779	8000	91490.2
NCS_034	N	F	PU	45.5	23.3	-	-	-	-	379718	222709	491332	5.7942e+06	198758	217000	288000	893968	45053.6	125000	195000	524232	205464	61334	754289	1.14902e+06	63298.5	363711	522726	860570	2.39776e+06	785906	136397	39750.5	733735	91640.2	12374.1	299111	53425.2	584399	41600	8000	13600	50317.1	8000	24667.5	21850.9	118885	8000	37423.6
NCS_035	N	F	PU	38.4	29	-	-	-	-	391074	293731	479189	4.89978e+06	195693	240000	370000	1.09542e+06	34000	170000	308000	861422	326449	62733.8	916000	1.31872e+06	73703.7	465674	620972	821181	2.15643e+06	769491	154268	56834.2	736122	73929.4	15132.5	295161	48922.9	516286	49000	8000	47717.7	67993.8	15840.4	45043.5	31309.7	155522	8000	57582.6
NCS_036	N	F	PU	29.5	22	-	-	-	-	291074	206061	300467	4.17517e+06	176576	200000	247000	847477	27833.6	131000	230000	583858	233384	50165.5	619933	1.00363e+06	51421.5	346582	495130	599015	1.67143e+06	601165	93588.6	17313.3	766894	84351.1	8338.84	188337	40992.3	425009	23000	8000	28000	33880.8	9773.88	23581.4	19448.3	126889	8000	37492.9
NCS_037	N	M	PU	43.6	29.8	-	-	-	-	338681	194500	412644	4.77328e+06	203250	214000	341000	1.07087e+06	80794.8	160000	250000	746716	253365	46480.4	769830	1.55237e+06	70538.4	355194	644363	673542	2.17556e+06	967361	102575	31364.4	690893	83873.6	18551.8	331756	39949.1	531511	19700	8000	33900	95284	8000	43419.4	27180	176501	8000	30674.2
NCS_038	N	M	PU	54.9	24.49	-	-	-	-	365082	228981	587404	6.61281e+06	242589	262000	425668	1.1208e+06	82978.3	144000	296000	677374	202022	67659.7	917396	1.37482e+06	95001.4	416539	533292	1.09189e+06	3.00414e+06	912666	143254	27955.3	778228	166868	136016	1.20799e+06	212530	2.01354e+06	183271	36600	104835	207937	39200	114875	85927.5	410045	46062.1	151781
NCS_039	N	M	PU	55.6	27.43	-	-	-	-	188770	133201	292258	3.63035e+06	143327	158000	262616	829004	65408.1	106000	167000	547590	154845	25300	560866	1.16213e+06	36456.8	258251	432244	572644	1.86027e+06	735183	97645.3	21430.6	890420	160522	9323.67	279435	63087.9	596407	61700	8000	9678.88	66414.3	8000	36494.3	10743.6	194221	8000	21621.5
NCS_040	N	F	PU	46	24.45	-	-	-	-	231550	117630	293626	2.81224e+06	120293	98000	170000	518960	27631.8	66100	118000	390272	110928	26503.5	443564	717738	23540.2	220144	327631	467445	1.46052e+06	517245	58603.2	8000	477052	100233	10796.2	238498	52055.3	582480	39600	8000	12116.6	39121.4	8000	22337.7	16867.5	114042	8000	21303.2
NCS_041	N	F	PU	45.1	24.5	-	-	-	-	229197	166277	297446	3.1342e+06	134478	134000	199000	502324	9000	80000	157000	374340	136482	35634.2	484867	659588	22029.5	245866	289397	522309	1.26765e+06	403447	67148.7	8000	455705	115438	31154.4	477793	102611	965879	102000	8000	48526.9	92667.7	10892	58394.9	43072.8	180561	9000	54161.8
NCS_042	N	M	PU	43.9	25.66	-	-	-	-	278672	181527	347682	4.16657e+06	142925	151000	228000	672627	17200	98100	180000	549641	175724	30400	627859	997148	41174.9	282586	415181	645684	1.80741e+06	659940	80329.7	23971.8	807950	106563	10531.1	247292	50506.5	516097	32100	8000	11660.5	44704.6	8000	37067.1	15471.2	138088	8000	24795.7
NCS_043	N	M	PU	59.1	21.7	-	-	-	-	199571	176599	364181	4.7894e+06	161341	159000	24600	709588	16400	82200	187000	454555	133338	32820.4	525454	834048	40448.7	263115	349855	675059	1.75514e+06	515970	82410.4	16400.3	839020	128756	14255.9	411540	66923.4	774668	65300	8000	65670	100291	14567.1	58518.4	34087.4	238384	12000	72589.7
NCS_044	N	M	PU	43.6	27.2	-	-	-	-	175231	73278.4	350623	3.15445e+06	120323	99300	237817	566521	33783.1	69400	174000	349290	76137.6	17875.4	478744	745373	25316.1	171473	241281	630355	1.70407e+06	539381	42337.8	8000	832787	119083	8505.23	224558	34327.7	376933	12000	8000	9584.25	34065.2	8000	16059.1	8169.3	103291	8000	14160.9
NCS_045	N	F	PU	54.2	33.1	-	-	-	-	242808	133921	382519	4.18649e+06	186072	122000	227774	601901	36519.4	69900	146000	388493	104848	16225.8	497441	860576	22835.5	199795	298017	512252	1.54574e+06	518163	48064.5	8000	833283	126308	29322.8	373900	97878.3	804864	63400	8000	20214.8	87492.9	8000	37898.3	16876.4	171767	8000	18453
NCS_046	N	M	PU	59.2	UNK	-	-	-	-	173666	52275.1	282173	2.64722e+06	136832	83900	154956	462506	46297.4	48400	105000	294818	68521.6	8000	372853	679422	17702.7	127899	255594	433569	1.44586e+06	533561	32448.4	8000	501362	67798.4	8000	242083	20445.6	409081	36500	8000	9000	56502.5	8000	18600	12184.3	110830	8000	8000
NCS_047	N	M	PU	45	23.55	-	-	-	-	278015	173350	481334	5.73501e+06	220468	145000	268080	737149	9624	89000	233000	529190	146030	39055	711375	1.11923e+06	36626.1	308488	437802	874998	2.36122e+06	772069	70712.9	15740.4	1.00409e+06	104516	10913.8	284255	70656.6	535128	56200	8000	20365.3	63227.1	8000	22748.1	25083.5	140741	8000	35892.5
NCS_048	N	M	PU	53.2	24.11	-	-	-	-	252346	172573	386330	4.03491e+06	152276	164000	254000	604579	19000	96600	190000	423567	144143	45830.8	581869	801878	47714.3	275908	368406	690869	1.69672e+06	536799	89586.2	17734.4	467558	68234.6	43839.8	436705	94289.2	1.04737e+06	60000	8000	44100	83121.4	13267.6	75625.8	38205.3	235310	8000	73283.5
NCS_049	N	M	PU	39.7	UNK	-	-	-	-	106919	68448.3	241900	2.71836e+06	109709	90000	174735	465674	8000	61200	126000	297962	74967.2	13386.3	357880	632715	25012.2	158017	242033	509069	1.42274e+06	419523	40709.3	8000	778934	100164	8000	213605	26290.2	488124	26000	8000	15700	48416.6	8000	27250.5	11424.1	143259	8000	15579.2
NCS_050	N	M	PU	52.4	UNK	-	-	-	-	206172	125819	423175	4.09863e+06	126849	136000	242168	637401	19100	80000	193000	433834	110619	28297.7	613462	852748	45196.8	236951	282415	764888	1.90577e+06	528897	61047.2	8000	533631	84138.1	31982.9	349000	76732.1	817830	48600	8000	39400	75700	8000	64859.1	20400	174152	8000	42991.3
NCS_051	N	M	PU	40.2	28.4	-	-	-	-	156836	105826	378332	3.75579e+06	157238	119000	240000	583550	17744.8	87000	184000	411313	113712	48717.2	672579	894202	68951	282974	327163	972538	2.44617e+06	606916	81955.5	8105.47	874110	99882.3	17772.3	291889	50026.7	490577	49100	8000	27300	60200	8000	47728.8	11800	138379	8000	31649.1
NCS_052	N	M	PU	64.4	34.29	-	-	-	-	239660	147990	399631	4.7391e+06	191179	180000	254289	716163	31031.7	95000	194000	488904	130593	35425.1	611427	1.07587e+06	59587.5	245461	367440	727492	2.13443e+06	733490	84643	17541.4	566083	76908.4	8000	223972	31897.9	471572	26600	8000	20000	65400	8000	23000	13000	136089	8000	28300
NCS_053	N	F	PU	46.2	20	-	-	-	-	263384	167281	265627	3.32899e+06	165450	142000	185700	571640	15600	72000	138000	363984	128216	33724	438390	587864	32496	219094	271468	498032	1.26404e+06	389173	62022.2	8000	697887	93545.9	8000	246391	66366.1	622135	27000	8000	24100	47200	8000	23000	20100	104583	8000	41000
NCS_054	N	M	PU	54.2	26.3	-	-	-	-	304006	157210	376953	4.21239e+06	130490	182000	339448	966257	27100	117000	225000	637399	178535	50500	688179	980017	52947.3	293941	377892	709249	1.93176e+06	627520	119902	23172.5	484892	62316.9	8000	212546	41640.8	459896	17000	8000	14100	51400	8000	31800	12700	114081	8000	25300
NCS_055	N	F	PU	51.2	23.71	-	-	-	-	154798	100562	337115	3.75395e+06	157875	115000	167000	403494	8000	65000	154000	354214	88639.1	14658.8	513945	841957	17741	172565	235032	476299	1.39565e+06	582887	25900.1	8000	573956	106526	17519	295535	76052.2	867068	87200	8000	32400	68000	8000	42327.8	15800	160242	8000	63989
NCS_056	N	M	PU	29.8	25.45	-	-	-	-	316660	197156	394010	4.6454e+06	136666	207000	303960	942903	30200	125000	236000	615524	189500	48570.9	689007	1.12572e+06	63383.6	313616	429067	658141	1.88396e+06	692372	93712.1	21607.9	878608	176444	22387.4	381397	97153.8	928892	70800	8000	24698.1	65940.6	8000	47799.8	18986.7	188198	8000	31992.8
NCS_057	N	F	PU	53.5	30.12	-	-	-	-	375482	294042	453281	5.55916e+06	189336	234000	376212	1.02229e+06	41024.1	133000	251000	660214	258462	42500	753564	1.12816e+06	47835.1	403871	470083	694384	1.91723e+06	562093	113455	22347.2	840877	130493	46708.8	457735	126950	782621	72300	8000	32614	75208.9	8000	70363.7	24490.4	162811	8000	36328.3
NCS_058	N	F	PU	40.9	23.4	-	-	-	-	309839	167404	436539	5.14995e+06	202271	140000	242118	742997	12717.5	82900	170000	509991	146677	23376.8	620822	1.20215e+06	28618.6	272038	444967	666553	2.00687e+06	788335	60450.5	11561.4	865958	123419	11359.6	276802	59480.1	564673	65300	8000	8225.32	53922	8000	35743.4	12371.4	170499	8000	15393.1
NCS_059	N	M	PU	44.5	25.38	-	-	-	-	167314	96508.8	271649	3.22181e+06	106885	80000	153800	443513	8000	45500	118000	275401	73823.4	8000	364276	627777	12057.4	169494	233541	497032	1.3634e+06	419438	49398.1	8000	830685	110660	8000	205518	29160.2	433146	26100	8000	8000	25043.3	8000	10015.4	11971.4	87942.7	8000	14860.6
NCS_060	N	M	PU	36.3	24.82	-	-	-	-	274521	195051	298348	4.04508e+06	125143	140000	224000	661841	9000	83000	150000	466125	160420	16357.9	497864	843295	18893.4	254624	353609	511555	1.38437e+06	512854	47754.4	10621.1	1.00168e+06	131368	12168.8	278458	64310.1	509368	32800	8000	17643.7	54854.9	8000	25663.9	12234.8	106197	8000	29252.7
NCS_061	N	M	PU	63.5	15.96	-	-	-	-	161342	141334	296343	4.4701e+06	149365	121000	169000	552187	8000	75000	175000	422716	104458	13700	486532	890317	30266.1	260506	318425	784892	2.32184e+06	660601	62336.2	8000	916427	109795	11376.9	268841	57439.9	559377	25700	8000	8513.28	33357.2	8000	19633.3	8000	121130	8000	37188.3
NCS_062	N	F	P	37.8	21.8	-	-	-	-	233549	164189	172642	2.97755e+06	84077.2	128000	126000	515409	8000	64800	93600	374495	143000	8000	302677	616309	13403.2	175872	256196	280872	784144	334457	25258	8000	1.14024e+06	179203	9218.43	255028	32469.3	414218	16000	8000	9222.05	46169.5	8000	23437.2	17436.8	104599	8000	24945.3
NCS_063	N	F	P	41.6	22.68	-	-	-	-	195469	119820	320297	5.81897e+06	244928	125000	180588	608781	94000	51500	165000	494830	99952.2	12898.1	473437	911754	24249.8	194460	305436	600227	2.02299e+06	517993	44282.8	8000	2.37768e+06	137349	8000	246224	30661.7	488712	32000	8000	20230.5	72546.3	8000	25176.2	19797.1	131880	8000	36531.9
NCS_064	N	F	P	47	24.93	-	-	-	-	245366	161299	306151	3.08046e+06	111497	125000	215912	615177	18300	64100	149000	408414	131081	27306	490699	681667	22916.2	231692	282321	503736	1.28308e+06	435972	57361.1	8951.73	1.89836e+06	205736	8000	154159	36998.4	297676	8000	8000	10450.5	25288	8000	13082.7	8449.35	82341.5	8000	16980.1
NCS_065	N	F	P	50.1	23.14	-	-	-	-	137046	103798	337917	2.94368e+06	82785.6	107000	306254	686555	9800	58900	211000	334276	74641.6	12274	462773	600027	33155.4	215172	230535	575308	1.41234e+06	381707	49355.4	8000	1.31662e+06	147664	8000	111635	34343.2	414549	11000	8000	8952.03	8453.35	8000	19112.2	8000	83622.9	8000	25063.3
NCS_066	N	F	P	37.2	23.88	-	-	-	-	239784	173871	363863	3.78755e+06	130663	181000	301135	770343	23200	87600	172000	442944	178382	45047.8	619714	888280	54929.4	306744	448836	704073	1.77521e+06	596588	98198.4	16508.1	1.51664e+06	120877	8000	116932	19717.3	318010	8000	8000	13600	24053.2	8000	13122.2	8125.37	74366.2	8000	19981.7
NCS_067	N	F	P	40.8	23.23	-	-	-	-	127826	71775	63257.2	1.30801e+06	54922.6	49200	41100	241065	8000	35000	21500	157748	57854.8	8000	134418	306658	8000	63707.7	144190	141182	316151	181054	8000	8000	610080	118510	8000	151401	11857.9	238444	14800	8000	8000	17109.4	8000	8000	8000	60544.3	8000	76000
NCS_068	N	F	P	44	23.62	-	-	-	-	71257.5	45951	43757.2	1.26784e+06	55717.8	38300	28200	219448	8000	14600	20600	136729	31904.1	8000	91834	269539	8000	44570.3	116868	118157	287559	165620	8000	8000	436928	88482.3	8000	138656	8000	277556	17000	8000	8000	16446.3	8000	8000	8000	63421.5	8000	8700
NCS_069	N	M	P	47.6	20.53	-	-	-	-	118700	63010.1	57055.4	1.72279e+06	57132.3	54800	25100	224386	8000	20900	23000	188845	55140.9	8000	133843	376857	8000	67323.1	176714	163318	407735	262628	8000	8000	880984	139655	8000	196402	15520.8	315022	17000	8000	8000	23974.2	8000	14847.3	8945.56	81825.6	8000	8000
NCS_070	N	F	P	36.2	26.96	-	-	-	-	150068	95360.8	107279	1.83676e+06	62333.7	88700	70900	400301	8000	47600	50500	265813	89800.2	8000	160016	482737	8000	65613.1	213403	142362	388512	295042	8000	8000	1.02066e+06	162377	8000	158904	24873.4	250536	8800	8000	8000	12747.6	8000	8000	8000	44987.4	8000	8000
NCS_071	N	F	P	26.6	19.84	-	-	-	-	148977	91458.2	97248.8	2.46717e+06	111897	73000	59300	413004	8500	43300	57900	307339	93370.7	8000	198873	570186	8000	89014.4	240378	169866	581103	398756	8000	8000	1.08982e+06	158752	8000	120808	16112.6	328033	21100	8000	8000	14142.7	8000	8000	8000	65275.4	8000	15148.7
NCS_072	N	M	P	58.6	29.89	-	-	-	-	232354	128605	267896	3.10537e+06	121983	106000	169115	549684	23203.2	57800	107000	348253	125991	10120.5	413271	750054	14326.9	210101	368261	413881	1.33118e+06	547223	45801.3	10826.1	1.13007e+06	89588	8000	101440	24295.2	210875	8000	8000	8000	11870.6	8000	8000	8000	39405.3	8000	8000
NCS_073	N	F	P	40.2	21.3	-	-	-	-	194380	121730	183862	3.22917e+06	154380	99600	77348.7	388604	8000	36500	61100	272669	82109.3	8000	279723	583423	8000	134505	242442	257972	800112	354102	12647.2	8000	1.32137e+06	118651	8000	173334	26217.3	354914	23800	8000	13703.4	26925.1	8000	11627.8	9768.49	90235.5	8000	12695.5
NCS_074	N	M	P	30	25.42	-	-	-	-	220348	155909	265450	3.44008e+06	105881	115000	161471	583868	21000	65000	90600	314423	118357	15036	392177	714527	22135.2	207411	314253	402214	1.38653e+06	504639	64839.3	11507.5	1.43498e+06	133337	8000	156384	16739.8	276611	11400	8000	8000	20151.5	8000	8000	8000	54295.7	8000	14687.7
NCS_075	N	F	P	40.1	21.3	-	-	-	-	299483	172975	266344	3.41431e+06	127293	112000	159000	544955	8000	74000	127000	516636	176211	15829.4	472985	810744	16023.3	224020	340518	385654	1.30929e+06	481264	39984.6	8000	1.18801e+06	111457	8782.76	218119	27596.9	310288	16000	8000	11087.2	29526.7	8000	19706	8789.44	83821.8	8000	11988.4
NCS_076	N	F	P	39.2	22.48	-	-	-	-	253978	146098	184698	2.5662e+06	141754	92400	123000	445822	10378.5	48500	84000	451454	183916	11307	370320	774843	8000	176427	346845	259621	847285	459102	18478.6	8000	1.85897e+06	130744	8000	116221	10638	206302	15200	8000	8000	11229.8	8000	8000	8000	43168.7	8000	8000
NCS_077	N	M	P	43.2	28.81	-	-	-	-	355476	224140	275203	3.96228e+06	209260	191000	8000	979137	96522.3	135000	127000	670125	238297	28200	536501	1.14952e+06	36980.7	258226	515408	396729	1.5512e+06	733674	105658	31051.9	783936	143588	19514.6	354608	35435.9	535417	56458.5	8000	15501.6	83114.8	8000	28795.2	40830.9	153022	8000	24632.6
NCS_078	N	M	P	59.9	22.75	-	-	-	-	256525	194789	269644	3.96291e+06	147037	154000	153000	520107	11800	75400	84900	355483	137962	8000	382524	764152	21447.6	238207	401064	416105	1.38189e+06	556663	73503.7	13556	643391	132413	18606.8	341276	64923.6	745138	52800	8000	19918.3	58372.1	8269.8	42596.4	33785.8	157912	8000	37205.4
NCS_079	N	M	P	42.6	26.47	-	-	-	-	352147	229150	383239	4.80798e+06	188392	175000	268408	926167	28868	119000	226000	798923	286081	39035.4	770709	1.49156e+06	48365	375541	668520	642268	2.12082e+06	1.03858e+06	114487	44508.3	1.10952e+06	127171	37190.1	461969	94422.6	861417	68500	8000	37600.9	109345	8000	84424.4	37382.8	252784	14200	44730.7
NCS_080	N	M	P	44.8	24.96	-	-	-	-	188092	139926	417481	4.70282e+06	156133	169000	343608	938395	31800	94600	198000	546506	138656	18759.1	622847	1.10286e+06	52887.9	285389	449502	812985	2.42719e+06	761346	97779.9	17267.3	964969	142642	21698.5	382860	64410.4	692599	48700	8000	22700.6	74296.3	8000	39029.4	22800	200556	8000	34401.3
NCS_081	N	M	P	48.6	21.3	-	-	-	-	416015	253713	410346	5.22268e+06	169499	205000	240000	776581	17100	93700	191000	622207	230297	40724.7	758896	1.19738e+06	71376.6	397665	520296	769766	2.18464e+06	834973	79847.5	24310.1	766202	110997	35601	450001	74782.9	782192	50600	8000	41235.1	102480	11481.2	79995.6	44034.8	193135	10000	50041
NCS_082	N	M	P	42.2	23.77	-	-	-	-	596689	452903	846926	1.09898e+07	406377	420000	571559	1.74267e+06	96818.3	195000	316000	1.24491e+06	425955	116770	1.40476e+06	2.67649e+06	148876	702774	1.16821e+06	1.49244e+06	4.57433e+06	1.84989e+06	328602	147414	1.47875e+06	109939	20976.3	502848	94650.1	830343	67000	8000	44100	111891	8000	27578.6	43906.3	149842	8000	64261.9
NCS_083	N	M	P	49.9	29.91	-	-	-	-	153840	81393.9	92616.2	2.45659e+06	132367	90900	69800	642191	54641.2	59400	51900	357969	71129	8000	184809	555281	8000	70176.2	178506	207641	643066	335398	8000	8000	408080	84853.5	12953.2	347612	30174.5	437205	69619.3	8000	8398.76	65099	8000	9380.83	8694.49	96705	8000	15818.1
NCS_084	N	M	P	50.1	28.31	-	-	-	-	201176	126863	126866	2.9359e+06	162734	109000	98591.6	725045	93480.3	57800	54900	370176	110656	8000	212973	776503	8000	93389.6	291774	178571	593905	456013	8000	8000	485907	79303.7	8000	170747	8000	349927	34300	8000	8000	31496.2	8000	8000	8000	105927	8000	8000
NCS_085	N	M	P	51.3	29.4	-	-	-	-	181065	128216	191665	3.84215e+06	165850	142000	137382	802557	45248.9	89000	100000	501662	127429	8000	342521	980953	12048.9	140188	357158	358150	1.077e+06	682671	35209.5	11500.6	584061	104424	8000	199006	36003.2	454549	22000	8000	8000	26040.7	8000	14841.2	8000	109762	8000	16713.9
NCS_086	N	M	P	55.1	28.39	-	-	-	-	270818	134950	279592	4.07252e+06	158261	121000	155109	558309	19713.9	64100	115000	338611	111209	16963.7	405092	695574	19524.6	202222	316514	509066	1.58323e+06	510542	62709.6	10668.7	1.07151e+06	110293	8000	255123	15195.9	403860	14800	8000	8000	27670.7	8000	8646.41	8780.55	92074.4	8000	8000
NCS_087	N	M	P	49	25.34	-	-	-	-	376712	213963	412814	6.18931e+06	266722	198000	250000	974894	67059.5	132000	190000	720080	209074	15134.9	637596	1.71951e+06	39399.5	305891	642339	497032	2.04501e+06	1.23029e+06	88052.5	37684.7	1.04713e+06	109645	14533	360740	53071.8	669493	57100	8000	15300	88886.2	8000	31013.3	31000	196297	10400	11961.4
NCS_088	N	M	P	43.6	26.3	-	-	-	-	266803	170124	355269	4.18175e+06	141086	150000	214000	656749	24754.8	96000	190000	515217	163563	30138.4	617960	1.09807e+06	40815.2	273667	414745	594439	1.76925e+06	765364	73827.5	33299.4	685743	99818.2	11692.5	229244	44028.7	564823	36900	8000	24007.6	43910.2	8000	33536.2	11000	159407	8000	35405.4
NCS_089	N	F	P	60	31.4	-	-	-	-	242235	169577	241221	3.23941e+06	126697	163000	241332	903331	36225.4	117000	166000	574946	206648	11900	441118	942690	19233.8	213818	412025	334520	946607	528964	45923.6	14427.8	620374	145060	10565.9	295350	50867.6	531389	47389.2	8000	17036.7	84627.9	10243	26693.9	38370.3	176989	8000	18794.1
NCS_090	N	F	P	40	21.8	-	-	-	-	201167	137138	216496	3.6988e+06	161061	141000	156358	743050	29946.8	93200	156000	563210	160732	12057.4	458524	1.076e+06	25274.5	227645	388798	441096	1.53137e+06	607909	55631	10080.2	783498	132241	8000	178489	17146.6	437228	23600	8000	10213	19184.7	8000	10180.3	8000	87302.7	8000	23143.5
NCS_091	N	F	P	47	24.5	-	-	-	-	315450	220332	266949	3.86962e+06	173949	194000	206000	786964	54804.8	112000	123000	499636	195644	31600	480661	859099	33598.1	275228	426040	457490	1.38451e+06	588175	96698	34261.8	839237	134377	8000	159223	35200	436296	13000	8000	20157.8	22135.5	8000	29501.6	12400	129321	8000	26784.7
NCS_092	N	F	P	40	18.7	-	-	-	-	246341	138279	242267	3.38629e+06	153091	112000	8000	579101	22667.8	72400	109000	507365	169793	22686.2	506686	1.04751e+06	23667.4	253857	419476	491617	1.65491e+06	681828	54987.1	16407.4	725357	110933	9018	222699	31611.4	370007	31395.3	8000	14377.3	43679.6	8000	10683.3	12716.2	65591.1	8000	25413.9
NCS_093	N	F	P	60	27.6	-	-	-	-	346179	226467	425045	4.34201e+06	167895	222000	459013	1.28867e+06	59431	152000	295000	748664	238797	57300	737489	1.1189e+06	59675.3	361916	519911	784034	2.17291e+06	705175	169127	38303.8	1.01219e+06	142743	63943.6	472410	103038	557359	63471.3	8000	42827.4	92287.5	17834.2	56394	49535.8	166788	8000	58083.2
NCS_094	N	F	PU	43	23.5	-	-	-	-	372559	209824	380320	4.58436e+06	207972	205000	294269	998111	63851.2	122000	202000	687533	226352	34957	659327	1.23974e+06	45100.9	302017	492089	554473	1.70634e+06	802110	97688.9	32904.1	913488	140126	23390	374539	67725.7	632715	58026	8000	24474.8	83044.9	8000	34548.1	33659.1	147982	8000	29954.5
NCS_095	N	F	P	63	20.5	-	-	-	-	350687	257791	491740	5.92161e+06	207004	249000	413206	1.22485e+06	46784.7	139000	231000	673328	245690	53601.2	811915	1.31241e+06	81483.6	432354	620463	838607	2.30133e+06	815882	135830	40336.1	914721	126186	34235.8	439415	98482.6	687953	51045.8	11637.8	35741.3	90178.4	12600	48235.5	42599.3	191012	8700	49221.2
NCS_096	N	F	P	61	30.4	-	-	-	-	493532	358017	592649	6.27525e+06	198101	327000	503590	1.33127e+06	50400	184000	308000	717292	285083	88421.3	864888	1.21438e+06	97107.6	476292	572958	916561	2.10796e+06	694250	150211	46063	967860	120643	15843.9	287942	55995.3	553688	30600	8000	25488.2	67104.5	10094.5	40731.8	28380.2	150362	8000	41212.3
NCS_097	N	M	P	65	32.6	-	-	-	-	349980	261075	500351	5.42858e+06	192245	286000	468039	1.32205e+06	84472.7	169000	274000	705111	223791	52753.2	747555	1.39398e+06	93567.4	381201	586646	728888	2.15579e+06	833409	149373	50037.8	905884	123995	21480.1	345246	62152.3	840317	56500	8000	16400	56200	8000	76509.6	18000	238340	8000	16885.3
NCS_098	N	M	PU	47	27.7	-	-	-	-	192077	96140.2	118409	2.4692e+06	100777	101000	74000	487085	10200	55900	59100	380634	109250	8000	247112	669881	8000	112927	282324	246993	728783	431758	11988.8	8000	482353	108555	8000	225755	36138.4	438413	38800	8000	8000	40523.2	8000	17472.8	8000	123112	8000	12000
NCS_099	N	F	P	62	24.3	-	-	-	-	195950	109388	117107	2.54603e+06	126227	114000	101000	577013	22263.7	79400	90000	442931	128759	8000	275397	645439	8000	133238	276092	282971	763428	402810	28652.2	8000	524445	110790	8000	266756	41087	379987	35900	8000	8000	46363.9	8000	15670.5	20658.7	92717.4	8000	17899.2
NCS_100	N	F	P	32	34.8	-	-	-	-	242192	188278	147065	3.92233e+06	264407	196000	68882.9	1.08751e+06	221784	133000	73000	464228	184849	8000	242914	1.05319e+06	8000	133674	530440	203235	674168	633160	19751.2	34731.6	717876	136536	8996.87	372802	36378.3	701655	60900	8000	13230.1	73500.2	8000	21422.9	25028	169186	8000	17867.5
NCS_101	N	M	P	44	26.5	-	-	-	-	184892	124872	94964.1	2.8902e+06	93946.9	107000	60300	490906	8500	55700	43800	360255	114521	8000	157713	648289	8000	76964.1	271555	164753	439070	401168	8000	8000	742771	168006	8776.47	255809	28473.8	472292	38029.8	8000	8000	57594.5	8000	18189.5	15879.2	159137	8000	12487.9
NCS_102	N	F	P	40	24.7	-	-	-	-	261326	209578	165416	4.48057e+06	202979	170000	111000	826264	29701	95000	85700	521175	167481	8000	266785	925256	8000	135177	393758	234639	745834	518204	20652.3	15089.6	832427	136627	8000	284778	38375.6	565081	49000	9500	18694.5	80546.6	8000	18020.8	31427.3	165568	11400	20515.9
NCS_103	N	F	P	40	25.2	-	-	-	-	237720	168296	209675	4.73225e+06	179728	136000	114000	621393	17287.2	74100	96000	539004	156703	8000	405257	1.15287e+06	13361.1	167327	429376	337236	1.2204e+06	780367	31462.7	14913.2	1.015e+06	158918	8000	221241	38658.1	567030	39800	8000	9981.09	49576.8	8000	14150.3	13643.1	136302	8000	24322.3
NCS_104	N	F	P	43	24.6	-	-	-	-	199477	155629	228021	3.33293e+06	88356	129000	186085	733986	15900	86300	138000	448201	129139	8000	418527	721839	17422.8	189652	264035	399082	1.16091e+06	363783	42631.9	8000	988536	126015	8000	112189	12352.8	244576	8000	8000	8000	14201.9	8000	8000	8000	56824.1	8000	8000
NCS_105	N	F	P	54	25.7	-	-	-	-	382480	271577	612510	6.62804e+06	246834	262000	556625	1.61051e+06	106105	179000	367000	838745	234303	65919.6	896030	1.29684e+06	80303.3	388878	488177	992223	2.51351e+06	725336	124553	24408.2	986749	111972	10180.6	221120	49121.9	458723	25300	8000	32000	52208.9	8000	32800	11300	96621.3	8000	64990.5
NCS_106	N	M	P	42	27.7	-	-	-	-	201246	166292	345950	3.70241e+06	149620	172000	269712	778653	27521	88400	185000	431167	124254	29227.2	505518	760188	44494.9	259941	319010	636565	1.64294e+06	470669	86272.3	13630.9	1.04748e+06	123296	8000	184068	21620	364008	19000	8000	14100	34689.1	8000	19535.3	11600	107676	8000	22648.6
NCS_107	N	M	P	38	24.2	-	-	-	-	311224	234396	315869	4.62352e+06	153458	169000	186000	754718	22931.4	106000	148000	561455	194407	18000	499896	1.01419e+06	30392.2	241210	430401	439794	1.4342e+06	661871	60299.4	19097.5	866721	107425	9392.82	202812	56690.8	491311	27300	8000	12539.6	39260.5	8000	35309.1	9752.88	124920	8000	18550.3
NCS_108	N	F	P	43	19.1	-	-	-	-	169502	128150	199130	3.34615e+06	141995	117000	137630	497319	8000	51900	104000	304574	99145.9	8000	312130	657792	8461.16	164286	287102	337863	1.04573e+06	411046	29139.7	8921.63	594646	60392.6	10770.1	239170	25393.5	402957	26900	8000	8000	38385.9	8000	10519.1	16510.8	67394	8000	19728.3
NCS_109	N	F	P	32	22.3	-	-	-	-	336043	244453	340751	4.57223e+06	187446	205000	230000	796962	37092.7	130000	158000	500465	211768	22500	571768	1.01104e+06	33241.5	316427	503298	466315	1.34142e+06	647362	91385.9	41974.8	868694	127856	17184.2	341315	64605.2	739735	63600	8000	27652.1	67951.9	9536.08	38172	35868.6	210761	11200	57830.6
NCS_110	N	F	P	45	28.9	-	-	-	-	395467	232292	385124	4.44259e+06	163801	164000	222000	685235	11100	107000	174000	617875	251077	32560.1	674160	963800	37927.4	332607	458939	571326	1.48075e+06	546201	65184.9	9380.28	1.01358e+06	142186	19114.3	269863	38014.3	390539	34500	8000	30336.2	56114.3	8000	25318	22237.4	100347	8000	45558.3
NCS_111	N	F	P	40	21.6	-	-	-	-	293966	199837	278915	3.78674e+06	129294	162000	209000	761554	24600	90300	156000	557662	188268	16400	535325	943183	23463.8	245167	394949	450555	1.40158e+06	598635	84372.8	21584.6	913787	134883	10589.2	272560	44211.2	476407	29400	8000	15157.1	57536.7	8000	22125.3	21114.6	155561	8000	30223
NCS_112	N	F	P	37	23.4	-	-	-	-	325256	234980	420517	5.64321e+06	260110	216000	337301	1.11283e+06	60135.6	113000	262000	719029	222379	36624.5	720315	1.33511e+06	44231.6	322518	523622	669246	1.95216e+06	838613	97711.3	39980.5	1.11187e+06	132533	15164.7	334781	50390.9	545288	49100	11200	22532.4	70513.3	8000	17916.5	31189.6	124659	8000	31208
NCS_113	N	F	P	56	UNK	-	-	-	-	615708	368433	475234	5.88494e+06	252873	232000	275000	942150	41043.6	160000	244000	912536	435873	75153.3	1.06114e+06	1.52033e+06	69981.2	555300	775827	852489	2.2298e+06	866189	151510	60299.6	905029	109823	40210.1	480561	71976.3	714666	47700	13000	60354.3	86247	23263.9	71682	40193.2	176781	8000	64227.9
NCS_114	N	M	P	46	29.1	-	-	-	-	301736	173306	325518	4.44763e+06	200361	133000	181000	693408	30021.6	84000	130000	481380	151530	18414.4	471815	957313	25970.6	207544	404329	415722	1.46746e+06	707514	42848.2	15104.3	891517	143513	15677.6	341007	76128.5	714679	42600	8000	17289	71302.6	8000	25487.1	20271.1	159464	8000	20482.3
NCS_115	N	F	P	43	26.2	-	-	-	-	256033	175221	343793	4.79926e+06	180678	166000	247360	836987	41139.3	104000	160000	507776	150941	28000	545181	968770	32340.3	231202	378301	523606	1.78485e+06	666618	88726.9	22681.4	822365	154452	9074.07	295942	33020.5	486178	39000	8000	13409	53888.1	8000	28754.3	19320.5	147108	8000	29854.3
NCS_116	N	M	P	48	26.5	-	-	-	-	384145	255790	389278	6.07194e+06	240741	237000	309369	1.18255e+06	74991.5	151000	210000	724816	250545	47800	719907	1.41304e+06	57353.5	335831	597073	679254	2.23627e+06	933416	129026	50955.8	683616	130161	28501.8	448122	100443	889664	87000	16700	33770.9	111135	10261.1	45141.2	40233.2	182059	10000	48318
NCS_117	N	F	P	47	23.6	-	-	-	-	460833	296289	476459	6.37072e+06	279696	257000	361441	1.18934e+06	91669.3	165000	208000	794237	314787	51170.7	786813	1.57878e+06	59776.3	399970	786427	662785	2.17249e+06	1.05904e+06	124265	64685.6	762890	110225	21912.1	361460	84705.1	718782	62200	10000	39219	85781.9	8000	55192.7	40293.5	214136	12500	46866.7
NCS_118	N	M	P	66	31.2	-	-	-	-	240585	160738	359864	3.59159e+06	121335	148000	220000	738348	23777.2	103000	170000	482816	141321	27500	539311	951233	39722	243666	388811	548145	1.7101e+06	599286	85136.5	15518.7	776739	117970	8000	221466	29848.1	417776	10800	8000	14760.9	52407.5	8000	26589.2	14917.6	130316	8000	21888.2
NCS_119	N	M	P	43	25.7	-	-	-	-	324249	198943	368304	4.23403e+06	149954	167000	217000	707596	32335.8	36100	160000	559758	205672	31500	626686	1.01342e+06	36819.4	293024	440183	587249	1.81581e+06	681105	109149	41455	1.17641e+06	112147	8000	249261	34286.4	446687	19000	8000	8000	51309	8000	17607	12800.1	142977	8000	19560.2
NCS_120	N	F	P	26	18.9	-	-	-	-	198898	135530	292556	3.66612e+06	111845	133000	88915.4	657616	11000	87400	173000	503797	137412	38028.7	536529	841933	47705.1	277488	378495	695796	1.98088e+06	517272	57777.4	8000	633696	82673.9	9009.91	166039	38218.4	404970	12400	8000	10384.6	14031.5	8000	25326.7	8000	86377.8	8000	37782.9
NCS_121	N	F	P	32	24.3	-	-	-	-	190940	120885	434739	5.12732e+06	275269	146000	230379	657527	27936	63800	190000	458770	120492	27476.2	679449	1.17101e+06	30000.8	259402	432615	769775	2.11654e+06	959643	38405.7	17092.1	1.53092e+06	108997	8000	172170	58223.5	392796	22200	8000	8004.19	20445	8000	12201.7	8000	92210.9	8000	32146.4
NCS_122	N	F	P	58	25.71	-	-	-	-	452864	312936	660613	6.45817e+06	276156	244000	426716	1.02313e+06	39591.7	125000	320000	733677	246107	75108.4	1.00547e+06	1.39569e+06	80032.9	496382	549361	1.21325e+06	2.78044e+06	843553	143869	36875.8	1.07914e+06	75017.9	16197.2	270633	63833.7	454444	15000	8000	19000	44000	8000	18300	15500	95272.5	8000	35383.3
NCS_123	N	M	P	58	33.17	-	-	-	-	271793	152872	440916	3.91285e+06	152197	147000	287364	691537	49033.3	95000	155000	517127	171074	26590.2	644181	1.28003e+06	25410.9	269134	436107	525340	1.46809e+06	727783	64092.7	24558.9	928896	62255.4	8000	145311	9961.76	187146	8000	8000	8000	31600	8000	8000	8000	45100	8000	8000
NCS_124	N	F	P	44	20.76	-	-	-	-	475351	371493	536071	6.86117e+06	267360	256000	361000	1.08651e+06	29730.5	160000	308000	886950	324152	69178.4	951211	1.47316e+06	73752.2	551661	655518	1.05273e+06	2.8889e+06	888420	137961	43895.3	1.71529e+06	73121.4	8000	197908	67612.9	400818	11000	8000	15100	40800	8000	19700	15660.6	97662.3	8000	15484.9
NCS_125	N	F	P	57	22.99	-	-	-	-	386845	310025	743350	7.8114e+06	299442	279000	499502	1.15897e+06	28000	145000	363000	762115	260825	60625.2	1.06234e+06	1.51734e+06	78790.3	553634	635150	1.18493e+06	2.72505e+06	929383	115569	37539.7	1.32667e+06	50476	8000	129066	14760.5	297638	10000	8000	8000	21600	8000	8000	8000	58347	8000	18300
NCS_126	N	M	P	63	26.23	-	-	-	-	313578	205846	433402	4.56119e+06	147800	165000	335925	1.01678e+06	34480.8	117000	247000	673757	195035	31627.6	692544	1.14536e+06	37876.4	316650	425550	684003	1.98135e+06	651344	100389	24787.4	1.02356e+06	63300.9	8000	120621	11882.8	240619	8000	8000	8000	15000	8000	8000	8000	36296.9	8000	8000
NCS_127	N	F	P	54	26.64	-	-	-	-	413266	292045	643192	6.2939e+06	297182	215000	405000	1.01004e+06	46784.7	160000	380000	943990	297969	50285.7	1.19872e+06	1.95201e+06	66262.1	528869	696184	1.10019e+06	2.95218e+06	1.27046e+06	130470	62251.1	1.02695e+06	62736.1	8358.64	222262	26133	328572	26700	8000	18500	66014.8	8000	14200	16858.4	102265	8000	40858.3
NCS_128	N	F	P	44	23.88	-	-	-	-	472123	303082	412191	5.1477e+06	241016	180000	219000	635962	17459.9	107000	161000	514650	211397	51739.5	662223	1.03332e+06	42401.8	332966	427764	691793	1.81726e+06	672797	113373	32385.9	940645	57547.1	8000	182907	21347.5	342042	8000	8000	9000	23300	8000	11500	8000	54483.9	8000	22528.4
NCS_129	N	M	P	51	34.66	-	-	-	-	385409	238977	551161	5.48072e+06	193135	180000	361579	1.00002e+06	49217.6	112000	260000	747378	206107	36459.5	819214	1.55236e+06	47081.2	348049	493433	823872	2.36645e+06	974319	95088.3	22463.6	1.19293e+06	74394.1	8000	144995	25954.7	334312	8000	8000	8000	24000	8000	17000	8000	99736.6	8000	8000
NCS_130	N	F	P	66	25.78	-	-	-	-	230902	157408	347986	3.79716e+06	152606	132000	241426	723055	42106.7	85300	141000	404980	126918	19600	421988	810191	21720.4	208854	314514	469488	1.38968e+06	459230	63976.7	8000	820517	55537.3	8000	147369	11928.1	275105	8000	8000	8000	16200	8000	8000	8000	72261	8000	8000
NCS_131	N	M	P	33	21.45	-	-	-	-	344439	258132	416982	5.48834e+06	211515	194000	263041	797605	43715.1	100000	170000	475098	164483	24900	588524	1.002e+06	40593.2	311673	454968	662416	1.96105e+06	696863	111862	30221.3	1.35902e+06	88520.2	8000	183889	25125.1	329212	22200	8000	8000	17981	8000	9955.62	8000	71652.2	8000	9753.86
NCS_132	N	F	P	63	24.17	-	-	-	-	301187	231445	418473	4.48783e+06	157115	200000	151948	931497	21000	130000	230000	578199	203128	43178.7	632718	892259	47985.7	330375	415077	674646	1.67208e+06	521462	87917.6	15417.6	645093	135600	34047.2	449276	100914	938551	89000	28100	44029.8	112565	13244.4	61852.3	47237.7	221291	19026	55631.5
NCS_133	N	F	P	31	21.46	-	-	-	-	291420	224550	373380	4.61111e+06	172712	180000	287105	854605	25408.3	115000	242000	563174	176057	42779.3	636361	921044	54626.2	328896	354956	828389	1.93925e+06	515137	100052	11833.6	1.09213e+06	103598	8000	140373	31198.3	371778	8000	8000	13939.9	26855.3	8000	25624.9	8000	95131.1	8000	22027.7
NCS_134	N	M	P	38	21.5	-	-	-	-	267573	225023	341069	5.48732e+06	217902	196000	260000	898012	29400	110000	180000	553678	163881	33700	632920	1.06445e+06	46653.6	318383	423721	743865	2.36119e+06	694915	101734	19774	1.21004e+06	94211.5	11189.4	286522	34795.7	463704	28000	8000	17857.8	45690.1	8000	19460.5	12844.2	100104	8000	28912.5
NCS_135	N	F	P	44	26.45	-	-	-	-	317644	227432	388365	4.85881e+06	216928	171000	265000	882975	32000	115000	190000	680325	217055	41564.1	708385	1.38252e+06	44499.5	339958	525250	732900	2.11543e+06	793910	109187	23006.7	1.13131e+06	87044.4	8000	184802	25794.5	349957	10000	8000	12136.7	34291.8	8000	15438.7	8000	102252	8000	10844.4
NCS_136	N	M	P	65	26.3	-	-	-	-	291000	172535	359662	3.87846e+06	170961	133000	244091	802755	40453.9	88500	186000	547895	159359	18900	526178	1.09297e+06	21967.5	242352	401604	512654	1.72487e+06	691634	87490.7	27152.6	1.18504e+06	51943.6	8000	71987.9	14515	134559	8000	8000	8000	8000	8000	8000	8000	43322.8	8000	8000
NCS_137	N	F	P	60	23.42	-	-	-	-	427557	310133	457964	4.59288e+06	159293	235000	318000	820293	19800	120000	180000	553632	259146	61083.7	766336	973037	56426.9	411314	462704	676879	1.61179e+06	534030	110162	25596.3	807284	145927	43810.1	476455	76563.4	613668	68200	8000	40816	90856.8	16214.4	43413.6	47056.7	153191	8000	59037.3
NCS_138	N	F	P	55	21.26	-	-	-	-	246421	146280	299857	3.44161e+06	134542	138000	256561	774664	20242.9	86000	170000	505647	167997	24700	508173	854946	22676.9	263165	380570	480454	1.37562e+06	519152	83818.4	18854.4	835459	135676	13121.8	335555	35209.7	417616	55200	8000	23366.2	89563.8	10788.6	16328.4	27911.2	125998	8000	47343.9
NCS_139	N	M	P	27	24.3	-	-	-	-	269943	151930	312702	3.52291e+06	135432	114000	173000	554046	8000	75600	141000	461196	141808	19100	535916	803237	23398.4	236110	305944	533945	1.46344e+06	539176	56501.6	8252.68	931648	162382	21612.4	325978	56625.9	568265	39000	8000	23190.5	69686.1	8000	34955.6	22597	142070	8000	38321.7
NCS_140	N	F	P	54	28.73	-	-	-	-	255529	155631	378007	3.38026e+06	138946	143000	317618	749290	29485.2	84900	196000	490246	164286	22094.1	560006	844892	24824.1	269176	354486	551814	1.35743e+06	523258	60798.7	8000	694888	102783	12419.5	282961	27412.5	372580	38300	8000	10644.7	49496	8000	12054	12305.2	102784	8000	16070.1
NCS_141	N	M	P	43	37.13	-	-	-	-	297041	196305	356128	3.79308e+06	156456	180000	303334	906591	87527.4	116000	160000	512541	172091	31400	550990	933356	32669	267555	397918	526674	1.50784e+06	574239	113745	24391.8	921791	148214	12582.3	358415	42471.6	691610	51300	9000	10476.2	79729.4	8000	19152.4	20313.6	155203	8000	21201.3
NCS_142	N	F	P	27	17.58	-	-	-	-	316486	212586	287721	4.2097e+06	150365	163000	254206	752307	14400	92000	190000	448554	144279	29756.3	506026	830993	29480.9	242066	283742	546089	1.42715e+06	445836	54886.8	8000	901315	149076	22239	397345	91475.6	814028	68700	12700	41439.7	80614.9	11869.2	57786.6	29519.4	163880	8000	72768.7
NCS_143	N	F	P	62	28.63	-	-	-	-	327974	158000	257000	4.26338e+06	176024	8000	8000	658011	28250.6	95600	175000	527215	195500	45690.8	663702	1.1044e+06	40873.6	337974	466351	708131	1.80967e+06	667313	94294	17455.9	716334	141913	35595.3	517594	139828	1.17949e+06	107000	9000	33601.7	95706.8	10572.4	68323.9	29151	282100	15300	50548.1
NCS_144	N	F	P	48	29.37	-	-	-	-	263110	150920	321376	3.04293e+06	115250	123000	209000	533606	18525.8	77500	148000	468446	163565	27400	540441	958075	28250.8	230125	327219	461604	1.26673e+06	552165	59422.3	8000	793599	128941	18539	337635	44348.9	442315	41000	8000	22200.1	74471	8000	31391.2	16422.6	133415	8000	13027.5
NCS_145	N	F	P	79	21.88	-	-	-	-	196360	133944	353346	3.66482e+06	110789	133000	295122	711826	16200	80000	190000	452261	143142	37995.8	554557	845498	36519.4	261973	332880	706193	1.56824e+06	542423	56928.2	8000	684399	120742	33586.8	393485	108528	686578	60700	8000	25992.1	61444.9	8000	47857.3	16816.1	157742	8000	35810.9
NCS_146	N	M	P	59	25.08	-	-	-	-	281603	162323	313118	2.97436e+06	108079	135000	260301	767608	24691.4	85000	160000	493443	156192	16400	487826	784716	15748.3	216905	307756	438292	1.15246e+06	466359	56093.5	11270.4	847649	134019	11423.8	261617	29278.3	346709	27000	8000	9482.18	56478	8000	21437.1	21242.5	107430	8000	16053.3
NCS_147	N	F	P	59	29.05	-	-	-	-	241659	156432	227230	2.37745e+06	106073	120000	160000	495364	20100	78000	93400	338978	139414	19500	379531	602496	22375	205078	287021	358801	991924	349598	39915.1	8000	404169	82005.9	8276.47	261609	22613.3	386348	49000	8000	8000	43742.5	8000	14100	15956.1	83780.9	8000	8000
NCS_148	N	M	P	65	25.45	-	-	-	-	233532	145802	351473	3.97341e+06	157624	140000	220000	665719	27792.6	70000	150000	420588	116113	32201	516294	826673	42824.4	245786	297148	655780	1.79994e+06	599611	67061.9	8271.98	705391	123909	28039.1	470568	82521.8	832809	75000	13000	25175.2	62135.1	8000	46767	16902.2	159689	8000	43875
NCS_149	N	F	P	39	22.2	-	-	-	-	233004	175885	381382	4.0905e+06	131621	150000	240000	647324	11000	77700	142000	383540	121303	25700	462106	710618	27206.7	254632	305909	581044	1.54213e+06	445097	63192	8000	901696	138528	8000	309963	39774.8	570179	40600	8000	8239.27	38747.9	8000	22503.7	8000	132728	8000	27127.7
NCS_150	N	F	P	52	22.72	-	-	-	-	214615	154020	279787	3.38734e+06	173427	126000	187061	561172	11700	59000	127000	338715	116496	11848.9	384428	652090	17531.5	193225	255025	393437	965286	389523	18346.1	8000	744084	106177	8000	225564	26899.7	351757	33200	12000	14202.5	49331.5	8000	10045	21070	67275.9	8000	21048.4
NCS_151	N	F	P	63	26.2	-	-	-	-	295638	215546	393634	3.46591e+06	103651	165000	342699	839702	25200	115000	240000	522768	161023	43070.7	599467	705110	36078.9	313418	294662	654627	1.44331e+06	408238	102428	8000	888428	123483	13914.9	273595	70430.4	559829	30000	8000	14028.7	24810.7	8000	42555	8000	104938	8000	12817.7
NCS_152	N	M	P	45	28.09	-	-	-	-	213609	125283	320982	3.18579e+06	121664	120000	211000	572353	22598.8	75000	160000	496847	122841	18200	492698	873405	24491.6	206195	272138	516340	1.50484e+06	534666	70748.8	8000	823567	93927.2	8000	161066	11085.6	283714	9000	8000	8000	18900	8000	8500	8000	64557.7	8000	8000
NCS_153	N	M	P	63	29.65	-	-	-	-	236179	153617	338987	3.38433e+06	127443	157000	300629	841312	30000	94300	180000	538315	157594	22100	536494	863025	33193.9	258232	343966	536991	1.5036e+06	491826	81921.6	10903.1	949991	128259	8000	252856	18022.4	332640	19000	8000	8000	46677.7	8000	10000	12358.3	88753.1	8000	8000
NCS_154	N	F	P	65	38.1	-	-	-	-	296641	173037	474119	3.77725e+06	139989	140000	338143	713647	17500	87000	200000	450272	154691	53458.5	649768	781856	45260.2	306904	335477	733213	1.5601e+06	402598	58233.3	8000	829727	96656.3	13191.4	281202	34531.2	378703	31500	8000	22800	68044.2	8000	25500	20277.5	127672	8000	22305
NCS_155	N	F	P	45	28.03	-	-	-	-	265964	210732	387198	3.8115e+06	128057	160000	276258	692945	14000	88200	193000	438409	147074	28900	513314	736325	38870.5	272415	309591	578822	1.34412e+06	393499	82254.8	8000	994604	131673	8000	176699	37867.4	470801	20000	8000	8500	21808.6	8000	23700	8000	129069	8000	12184.5
NCS_156	N	F	P	72	31.14	-	-	-	-	297996	191899	523212	4.01497e+06	154054	181000	360078	931211	67140.2	123000	237000	565858	173057	59251.9	689300	1.00727e+06	61661.8	318980	397481	815208	2.0224e+06	608366	105940	18779.5	753295	110908	21395.6	360648	51922.3	550908	44300	15000	24200	50059.2	8000	49137.5	16816.1	171242	8000	21023.7
NCS_157	N	F	P	57	23.44	-	-	-	-	233529	163979	362839	3.93676e+06	152282	144000	223000	618120	11900	73600	152000	463588	149699	17075.1	534696	962643	28818.5	260663	404003	515488	1.34104e+06	604485	34608.2	8000	681475	76953.2	8000	212366	30332.6	463577	36200	8000	10500	60748	8000	14655.1	22057	162048	8000	26784.9
NCS_158	N	M	P	64	24.72	-	-	-	-	210243	121588	388944	4.01277e+06	153162	131000	237882	734769	36609.7	71300	151000	444203	111402	11532.6	447747	945458	16207.6	177175	293507	492812	1.40665e+06	574254	33108.7	8000	654278	78213.3	12944.1	245548	28921.5	403196	26400	8000	12100	50684.5	8000	18400	11660.3	96218.3	8000	13578.9
NCS_159	N	F	P	53	30.12	-	-	-	-	378366	281001	575684	5.1444e+06	190075	220000	395215	907958	28500	112000	257000	558793	223358	73627.2	848014	1.07725e+06	75604	458901	481372	1.03908e+06	2.14192e+06	674327	102619	21919.6	731128	82097.7	13224.6	217334	70613.5	488025	29000	8000	35815.9	50433.9	11314.8	44461.4	13590.5	140783	8000	49845.3
NCS_160	N	F	P	52	27.51	-	-	-	-	248374	159711	402709	3.92499e+06	142876	142000	308952	751101	26200	82000	170000	483448	153736	23203.4	576291	1.10181e+06	22979.9	269343	408422	533780	1.4306e+06	629624	46756.3	10277.1	697294	67832.9	8000	245043	43139.7	421953	31100	8000	12000	52200	8000	18600	15900	134185	8000	11762.6
NCS_161	N	M	P	25	30.72	-	-	-	-	265519	149308	320785	3.23818e+06	112883	148000	249977	699412	41561.2	93800	150000	530059	159530	23000	546687	1.15282e+06	29686.3	255681	413338	541774	1.60197e+06	770896	70743.5	25696	741853	90268.1	11256.7	209788	26660.2	437042	20000	8000	10000	46000	8000	27500	15000	124582	8000	8500
NCS_162	N	F	P	28	26.83	-	-	-	-	199365	136651	251319	2.78291e+06	120014	128000	177000	520555	25390.5	72400	130000	381893	140241	31810.9	436223	712918	32531.6	233987	337238	460832	1.33179e+06	468342	66807	9766.6	445147	60279.5	8000	230986	24274.8	436464	21700	8000	20200	40400	8000	15800	11800	78285.7	8000	22000
NCS_163	N	M	P	77	23.94	-	-	-	-	388552	264591	444822	4.8601e+06	172803	201000	253000	656539	13000	113000	229000	588172	224763	63033.7	705041	921156	58360	375737	401993	789432	1.83975e+06	572921	132992	34837.6	944530	97611.6	8000	251997	37939.2	468616	18000	8000	24700	58126.9	8000	28114	18024.3	115533	8000	40428.9
NCS_164	N	M	P	63	26.28	-	-	-	-	311800	197701	382259	4.48708e+06	187805	163000	230207	733092	22204.4	92000	190000	638953	168723	21586.4	641122	1.43361e+06	35209.6	286008	432317	619794	2.11635e+06	831089	84606.3	15656.3	814041	74893.6	8000	206758	10595.9	333661	25800	8000	8000	57500	8000	15200	14000	108947	8000	9000
NCS_165	N	F	P	73	25.1	-	-	-	-	436841	303665	413225	4.6052e+06	153993	247000	344911	1.01058e+06	49270.1	165000	236000	676240	275109	67293.9	761496	1.17384e+06	60608.6	387913	532004	650302	1.62187e+06	604728	108593	33356.1	601858	130765	51304.4	551312	100779	915693	81700	30000	76774.1	147855	29122	82015.5	69864.8	238629	13700	89654.4
NCS_166	N	M	P	76	28.38	-	-	-	-	354298	222941	290824	4.32453e+06	188427	154000	182888	728473	44183.3	95400	127000	487303	180379	20409.1	411119	870993	11093.6	237721	411612	410548	1.26718e+06	470068	74447.9	12795.2	843439	123150	8668.81	360393	30286	498110	59300	8000	8000	51870.8	8000	8000	19267.1	112603	8000	10455.8
NCS_167	N	F	P	45	21.14	-	-	-	-	410524	244204	536341	5.81083e+06	180019	170000	344319	923513	23000	110000	260000	641504	209874	74996.5	872815	1.17608e+06	54166.2	459444	537971	1.15377e+06	2.69747e+06	756576	92139.5	15207.8	1.03903e+06	106108	20985.5	306485	58201.4	576600	38200	8700	33242.8	47613.9	9684.32	36758.1	20382.9	114734	8000	54095.1
NCS_168	N	F	P	54	23.78	-	-	-	-	329733	188660	373241	4.61228e+06	191202	142000	236629	682978	13000	75000	150000	486476	179184	26565.1	619022	1.09235e+06	24269.7	291626	444474	622498	1.61075e+06	644593	54366.7	10567.8	659826	113322	29006.9	453159	64936.1	705291	58000	8000	25081.7	99398.9	8000	30040.8	35517.9	189842	8000	35806
NCS_169	N	M	P	54	25.68	-	-	-	-	386276	241606	503952	6.51063e+06	333954	199000	385944	1.23204e+06	118442	115000	224000	879086	246726	39157.6	809997	1.89783e+06	29386.9	363115	657370	798978	2.83822e+06	1.2247e+06	134961	45384.8	1.55229e+06	110965	8000	254537	29198.4	463224	31800	8000	9300	54339.5	8000	19600	16000	135052	8000	12342.9
NCS_170	N	F	P	54	28.23	-	-	-	-	410670	256480	664461	7.07613e+06	289142	197000	399006	1.16705e+06	80960.2	116000	270000	723137	228172	65595.1	892563	1.60639e+06	42105.8	395194	603654	980862	2.67884e+06	999282	113021	32860.4	1.27604e+06	121062	8135.56	219486	44698.8	442459	29800	8000	16229.3	40963.9	8000	21598.3	10412.1	104323	8000	28796.6
NCS_171	N	M	P	56	33.95	-	-	-	-	267988	166330	404958	4.86763e+06	225278	143000	307328	926524	78672.3	98000	211000	681926	194712	24370.2	587293	1.24171e+06	21469.8	278313	493606	585157	1.91631e+06	820224	79636.4	22535.4	1.50813e+06	114051	8000	246939	28967.2	541416	21000	8000	8000	47933.4	8000	23000	8203.04	200722	8000	8000
NCS_172	N	F	P	52	18.83	-	-	-	-	386220	282576	580878	6.59085e+06	249010	206000	336371	983845	17000	125000	306000	714902	215331	65133.9	873731	1.25901e+06	57700.3	420521	456698	1.08486e+06	2.51032e+06	692284	82051.2	18389.9	836646	107833	77307.8	619850	164567	1.37413e+06	126000	34400	76570.3	134441	28676.6	114629	59736.3	320805	33400	105685
NCS_173	N	F	P	74	23.83	-	-	-	-	336051	245166	527633	5.64799e+06	244699	216000	469405	1.25991e+06	58927.4	146000	304000	790425	225211	50217.3	823159	1.33695e+06	50694.4	386294	508742	889238	2.49666e+06	732903	148809	31899	1.21661e+06	90681.2	16984.2	348346	25909.3	377913	30700	8000	19000	83625.7	8000	18800	19681.4	124473	8000	15639.6
NCS_174	N	M	P	74	24.31	-	-	-	-	346596	263888	743794	7.66462e+06	252959	201000	467136	1.12271e+06	18100	115000	359000	766056	194746	63873.4	982859	1.40802e+06	68217.3	433754	469192	1.34778e+06	3.27856e+06	812809	100307	16616.4	1.22003e+06	128107	12106.1	291600	82266.6	833715	49500	19300	41504.9	60015.7	12830.7	72775.1	16470.8	218114	8000	75318.4
NCS_175	N	M	P	71	27.44	-	-	-	-	437755	311347	628857	6.85753e+06	264765	239000	484154	1.34889e+06	46400	168000	343000	896669	296500	66562.3	1.02786e+06	1.6712e+06	64732.3	463230	667589	1.01826e+06	2.85726e+06	1.04673e+06	148511	48974.1	1.02102e+06	99865.8	16205.6	277403	59071.5	633768	53200	10900	22350.3	48402.8	8000	28799	15953.6	117496	8000	34449.5
NCS_176	N	F	P	67	25.71	-	-	-	-	602379	388563	797221	8.42712e+06	312799	260000	485147	1.36181e+06	66934.5	163000	360000	883006	344625	84385.6	1.09932e+06	1.60571e+06	93087.4	562618	764290	1.13896e+06	2.60303e+06	946563	141516	66893.1	1.24828e+06	105760	17673.5	235337	68437.8	513793	27500	8000	21175.9	65881.2	9303.54	31571.5	28586.4	113361	8000	39875.8
NCS_177	N	M	P	69	24.84	-	-	-	-	530597	347989	785471	8.65799e+06	294992	276000	548021	1.53545e+06	71535.1	160000	389000	1.00401e+06	321182	80844.6	1.22814e+06	2.13251e+06	97217.9	595106	857620	1.37693e+06	3.8203e+06	1.49533e+06	175025	69921.9	1.17018e+06	100135	9824.49	236001	51186.1	457191	25300	13000	25394.8	52155.7	8000	28544.2	17000	120823	8000	34779.9
NCS_178	N	M	P	52	25.83	-	-	-	-	482483	318994	645322	6.99503e+06	256802	268000	522443	1.37009e+06	106730	161000	306000	827323	267441	74013.1	1.00706e+06	1.54651e+06	69699.9	451801	600329	1.0189e+06	2.95032e+06	904344	152790	46985.6	1.47821e+06	122271	21739.4	290161	46946.2	474239	23200	8000	21015.7	47958.9	8000	27703.1	20111.8	123172	8000	21059.3
NCS_179	N	M	P	54	28.73	-	-	-	-	498838	322354	614277	8.54489e+06	305128	269000	319000	1.01659e+06	35123.6	145000	287000	933789	295317	66164.5	1.05448e+06	2.21682e+06	79183.6	473750	735735	1.11693e+06	3.6911e+06	1.406e+06	175179	65514.5	1.22852e+06	107982	32746.7	414158	85456.1	598309	36800	15500	28120.8	93788.8	10896.2	30395.1	32000	133566	8000	60331.7
NCS_180	N	M	P	53	24.69	-	-	-	-	405931	239892	665517	7.61025e+06	284674	204000	353490	1.07783e+06	59708.2	123000	249000	765154	234870	45303.4	927793	1.95502e+06	54791.4	377311	682821	918547	2.99145e+06	1.34667e+06	104549	44098.4	1.17545e+06	85764.8	8000	292183	34425.4	498598	35400	8000	12834.4	60904	8000	25415.6	14000	163395	8000	17080.9
NCS_181	N	M	P	67	28.07	-	-	-	-	242875	127655	430830	3.53029e+06	104916	109000	282648	670297	11400	74000	220000	439913	88994.4	25594.6	518769	679811	36732.3	223999	196248	707318	1.5784e+06	394933	48319.4	8000	750465	70494.7	12232.8	265067	30536.3	326453	11000	8000	11200	36300	8000	15000	15000	58075.9	8000	23504.5
NCS_182	N	M	P	61	30.47	-	-	-	-	345199	246530	497933	5.79367e+06	220895	217000	357888	1.02205e+06	33500	133000	257000	597667	221299	44527.6	741637	1.22832e+06	54212.2	370712	542500	701173	1.91451e+06	767727	102038	33743.5	929190	104866	12361.3	332256	43715.5	566737	28100	15000	22483.3	85222.6	8000	25407.6	31115.3	167956	8000	18536.9
NCS_183	N	F	P	54	20.7	-	-	-	-	449747	313246	506547	5.53776e+06	235362	219000	348951	1.01286e+06	31700	135000	275000	754258	297721	63485.9	931207	1.22822e+06	73834.3	516683	610966	1.00171e+06	2.53533e+06	740632	146813	36651.7	765939	71203.4	12592.8	270904	46288.7	415669	53900	11800	18000	43444.9	8000	38900	21697	123961	8000	29735.4
NCS_184	N	M	P	50	27.76	-	-	-	-	379764	259343	519690	6.33745e+06	270154	196000	323077	1.09844e+06	88117	122000	228000	861694	268643	52059.5	885133	2.06236e+06	55512.9	392903	745697	830736	2.79288e+06	1.42663e+06	118789	58118.5	1.35967e+06	90594.4	8000	215670	31398.3	344050	12500	8000	11500	48028.7	8000	16600	13000	68185	8000	11315
NCS_185	N	F	P	39	21.26	-	-	-	-	416187	344282	652538	1.03868e+07	321954	301000	427048	1.37755e+06	65428.6	135400	291000	794373	211194	80272	866586	1.47989e+06	85702.2	414315	544475	1.10702e+06	3.34894e+06	865370	138497	24464	1.41576e+06	113619	8000	222196	33804.5	420930	8000	8000	22823.9	32000	8000	25636.3	11900	82397.4	8000	36960.2
NCS_186	N	F	P	73	28.23	-	-	-	-	356642	174086	631278	6.34038e+06	220184	148000	374731	1.03847e+06	49699	80700	242000	581627	125521	52545.5	688692	1.0666e+06	47223.8	276889	334742	985302	2.64277e+06	725898	89453.4	10054	1.04385e+06	70178.6	9537.05	263885	35600	512630	13500	8000	8000	24900	8000	14500	8000	109114	8000	10476.5
NCS_187	N	F	P	66	34.15	-	-	-	-	490349	309166	648945	5.7227e+06	221153	217000	411336	1.02633e+06	49460.1	130000	265000	750107	332803	64878.4	931544	1.35993e+06	66175.6	481174	647827	859575	1.99707e+06	787791	108098	32179	741459	54409.4	11027	189099	25231.3	282361	10000	8000	12000	34100	8000	25000	14000	94487.5	8000	12000
NCS_188	N	M	P	70	25.36	-	-	-	-	295152	215408	525005	6.29007e+06	233861	185000	250507	760192	21900	93800	171000	520601	169595	33768.7	720720	1.31846e+06	40252.9	298219	467534	702163	2.30573e+06	877061	101252	38127.7	968750	75858.2	17346.4	272166	40112.1	487154	34000	8000	25000	69322.1	8000	25281.5	17868	122696	8000	26875.5
NCS_189	N	F	P	67	23.05	-	-	-	-	575247	338856	747531	7.79235e+06	331089	264000	402986	1.09827e+06	56734.4	134000	292000	1.13144e+06	391100	46245	1.35234e+06	2.43552e+06	60844.6	465327	813477	790706	2.63086e+06	1.49383e+06	127385	93944.4	1.40739e+06	84327.2	12469.3	268631	32349.1	414823	32100	8000	36000	33890.7	8000	26187	17000	122687	8000	36116.2
NCS_190	N	F	P	67	26.26	-	-	-	-	548104	345120	750004	7.5808e+06	251932	283000	482073	1.30399e+06	46100	162000	353000	919206	308231	82669.4	1.15462e+06	1.55445e+06	82054.2	491757	624703	1.12686e+06	2.88795e+06	976540	139664	43338.9	847011	69367.2	13223.2	222054	62067.5	495490	16900	8000	27300	41900	8000	51129.2	14972.8	136345	8000	37453.7
NCS_191	N	M	P	69	25.86	-	-	-	-	537176	357492	712966	7.88327e+06	257406	290000	481655	1.31645e+06	35000	177000	386000	1.04284e+06	332229	97361.6	1.21209e+06	1.84725e+06	105658	600142	716866	1.46848e+06	3.64738e+06	1.13397e+06	181928	55452.6	1.19428e+06	86815.9	18588.7	279715	70157.3	473382	21800	8000	22300	47600	8823.04	27947.1	17700	97539.6	8000	30703.6
NCS_192	N	M	P	47	25.64	-	-	-	-	498983	296123	597841	6.75537e+06	184374	229000	336183	888841	13400	97200	230000	728539	280570	52317.7	958369	1.39138e+06	63436.7	446974	581418	916891	2.43365e+06	929219	105540	28149.9	1.00522e+06	68672.8	17493.5	272145	56791.4	585160	19200	8000	33871.8	49187.7	8000	63679.6	18400	180674	8000	24524.7
NCS_193	N	M	P	64	33.5	-	-	-	-	277197	203864	426830	4.88673e+06	170590	186000	370008	949008	27000	112000	234000	686883	188205	55010.1	736211	1.2547e+06	52542.1	345015	406592	779806	2.17195e+06	672318	103007	19650.5	1.22042e+06	89237.3	8000	157250	12410.3	294039	12000	8000	8000	25000	8000	13100	8000	62900	8000	12700
NCS_194	N	F	P	42	16.67	-	-	-	-	571682	389141	822984	8.43795e+06	305710	294000	473760	1.08428e+06	30000	143000	38000	933719	340585	98722.6	1.38126e+06	1.86853e+06	120569	692665	739997	1.47218e+06	3.7663e+06	1.12248e+06	161024	42568.4	1.17111e+06	67321.4	11183.9	292894	56222.3	632827	53100	8000	42200	78200	8000	41000	30800	207748	8000	45042.4
NCS_195	N	M	P	46	19.94	-	-	-	-	374127	269100	347421	5.66599e+06	229769	188000	204000	785382	31286.6	108000	170000	659622	237220	29027.5	637662	1.38972e+06	31028.6	324611	593584	534025	1.8202e+06	878643	90448.7	41050.7	957764	132712	8000	260603	64110	624485	45000	8000	20522.8	70778	8000	32847.4	24411.9	177236	8000	31655.5
NCS_196	N	F	P	71	22.99	-	-	-	-	302003	193033	381706	4.61206e+06	172265	164000	300705	990823	31800	111000	234000	665401	199848	25100	633366	1.02007e+06	27662.3	290637	446677	602922	1.78927e+06	607430	92741.9	23199.5	868665	116711	9685.97	249600	42706.6	473859	28500	8000	8000	32076.3	8000	11627.1	12225.5	88077.1	8000	15796.8
NCS_197	N	M	P	73	25.68	-	-	-	-	333266	195561	359600	4.47688e+06	185627	130000	237888	792888	16500	94800	204000	575819	173362	21919.2	547179	914102	22901.9	266808	401835	514110	1.60177e+06	561578	77059.5	14183	1.07598e+06	145551	18739.6	355402	65471.6	586764	57300	8000	14641.9	56211.7	8022.65	29744.8	17864.2	134725	8000	16730.4
NCS_198	N	M	P	51	24.11	-	-	-	-	426624	259021	407987	5.36384e+06	178961	196000	252000	900292	21700	120000	185000	773062	285111	31447.9	726609	1.42535e+06	26094.5	347394	563324	554753	1.91994e+06	871494	80106.9	22870.2	817883	118720	24906.2	322055	66926.7	469795	26100	8000	22490.7	76592.1	8000	53849.1	29148.4	203846	8000	42437.4
NCS_199	N	F	P	73	20.2	-	-	-	-	369261	255573	380046	6.43064e+06	233071	166000	193682	835888	24206	83900	132000	494812	191039	22923.2	560534	1.12315e+06	26133.3	312048	550902	571067	1.90069e+06	751483	73587.6	22447.8	923544	116561	14606.6	329301	42952.4	480420	38500	8000	13991.5	66468.6	8000	19229.6	28177.8	134301	8000	35984.1
NCS_200	N	M	P	60	23.29	-	-	-	-	256649	165429	368301	5.18424e+06	222006	135000	196684	673811	22000	76000	160000	439557	117664	10417	468815	934170	24059.6	218431	351190	526271	1.7457e+06	634188	51394.6	10227.1	932555	135661	20040.4	330560	83487.9	778768	51400	8000	19980.2	61120	8000	52380.6	18281.4	201291	8000	24003.5
NCS_201	N	M	P	66	29.4	-	-	-	-	372836	209737	337399	4.09481e+06	119379	146000	205000	725114	18400	93100	149000	619741	250228	15970.5	590694	1.10522e+06	25361.4	290838	475056	423116	1.36487e+06	686788	45420.4	15637.6	1.05888e+06	145300	11660.8	250840	45917.9	455798	29000	8000	10408.8	46063.4	8000	26096.1	15503.9	128471	8000	15396.5
NCS_202	N	F	P	59	29.74	-	-	-	-	342822	195672	381604	4.08127e+06	146123	145000	245709	742465	25210.2	96100	165000	543525	203192	16938.1	547651	1.06237e+06	20633.5	265329	461035	456122	1.30946e+06	603385	48726.3	18477.9	795072	102619	14121.8	250279	39930.5	376250	26800	8000	8662.32	50266	8000	13803	29722.8	92623.3	8000	15988.5
NCS_203	N	M	P	55	30.76	-	-	-	-	262997	151210	342225	5.3516e+06	304736	172000	280139	1.15831e+06	170871	113000	153000	635867	145502	12610.4	513189	1.3771e+06	26766.8	207388	435839	490844	2.29529e+06	993048	80702.5	19160.9	758236	112720	21040.1	397990	40810.6	593672	58000	8000	11027.8	68454.1	8000	37788.4	12090.9	172280	8000	16332.3
NCS_204	N	M	P	50	28.04	-	-	-	-	184561	77119.5	171110	2.30994e+06	101564	82100	146551	591717	32720.4	55000	97000	406503	118408	8000	316623	860451	8000	132255	303580	241356	931168	506107	27844.4	9586.6	524930	93743.3	8000	110799	9995.19	188477	8000	8000	8000	8527.74	8000	8000	8000	43442.3	8000	8000
NCS_205	N	M	P	45	32.74	-	-	-	-	309903	120604	306578	3.83047e+06	195595	104000	170644	666781	52397	56500	104000	388648	106588	8000	381618	840248	8000	145717	339162	343818	1.26957e+06	580280	45546.3	8000	656428	108537	8000	266242	34787.7	456750	52000	8000	8000	46544.1	8000	23530.5	15782.7	230211	14200	8000
NCS_206	N	M	P	39	25.66	-	-	-	-	329509	227020	393082	5.79917e+06	231081	233000	272522	1.04931e+06	64061.4	147000	209000	748427	204408	42793.2	633278	1.4517e+06	66634.6	300894	517282	609614	2.55798e+06	877548	130616	35537.9	1.10305e+06	156486	35116.6	428267	71733.4	622284	78900	8000	15887.9	77202.5	8000	34443.1	25980.1	183837	10330.2	26750.5
NCS_207	N	F	P	38	20.86	-	-	-	-	350585	187141	351669	4.26295e+06	169775	169000	167244	599935	8000	66600	121000	443120	155841	17755.1	524680	848281	35757	238862	321125	471688	1.37842e+06	520066	52289.5	10605.2	814129	142565	22911.8	351384	57377.2	575373	57700	8000	27366.3	74973.6	8000	34917.4	41328.3	158551	8000	58021.4
QC_01	QC	QC	QC	QC	QC	QC	QC	QC	QC	336398	214228	539899	5.9432e+06	210671	220000	373056	1.05412e+06	51791.9	115000	260000	668008	202259	50960.3	817166	1.26413e+06	78825.2	375382	480668	959619	2.61373e+06	764217	123734	29711.2	1.80403e+06	108953	8000	174829	16887	293892	8900	8000	12818.3	30200	8000	14000	8000	69170.2	8000	19952.5
QC_02	QC	QC	QC	QC	QC	QC	QC	QC	QC	284908	158954	371046	4.84198e+06	176948	138000	259093	880394	39460.9	95600	164000	539352	151204	28486	575056	1.04971e+06	22479.5	255609	397842	601035	1.82433e+06	637921	70878.9	11038.3	1.49068e+06	103959	8000	161839	18937.7	305280	10500	8000	9707.67	21985.1	8000	16084.8	11792.8	68502.5	8000	13349.4
QC_03	QC	QC	QC	QC	QC	QC	QC	QC	QC	277867	160368	408387	4.82078e+06	173601	156000	291428	909460	46812.7	98000	205000	581854	181819	24092	633799	1.13025e+06	47720.7	271468	429615	678968	2.08814e+06	688837	71924	16234.5	1.42392e+06	101683	8000	153475	12493.8	284848	11500	8000	9304.93	21828.9	8000	10327.8	8000	67505.3	8000	15506.1
QC_04	QC	QC	QC	QC	QC	QC	QC	QC	QC	295544	186054	443154	5.39583e+06	201352	175000	309839	966719	53047.9	103000	206000	636720	185380	40540.8	677749	1.20005e+06	38898.2	305623	467882	745262	2.2654e+06	733970	99162.6	21529.5	1.64118e+06	93508.1	8000	145852	19378.9	270850	8000	8000	8700	17030.9	8000	10106.6	8000	62542.4	8000	13291.9
QC_05	QC	QC	QC	QC	QC	QC	QC	QC	QC	252025	143935	368316	4.3069e+06	162328	133000	271310	784513	36591.4	75500	175000	482424	138987	20281.5	550309	922399	22765.1	245616	352868	603816	1.77171e+06	538526	67622.7	9520.27	1.27361e+06	135119	8129.69	216765	33432.4	406258	17000	8000	8898.83	40186.3	8000	17946.4	8000	102940	8000	22362.5
QC_06	QC	QC	QC	QC	QC	QC	QC	QC	QC	255900	160683	389419	4.54456e+06	168344	138000	274878	794671	33086.4	68100	180000	483932	137642	31196.5	553560	900221	28421.7	246070	357430	658768	1.78888e+06	526129	68908.3	12897.9	1.31715e+06	103867	8000	168083	16394.7	322777	9900	8000	8000	25812.3	8000	9623.78	8000	77616.3	8000	16001.1
QC_07	QC	QC	QC	QC	QC	QC	QC	QC	QC	203823	115453	324240	3.41585e+06	126672	115000	236657	652507	24687.5	83200	170000	418476	122302	23308	503535	793936	27847.1	230405	318492	551359	1.54396e+06	487159	69228.1	8014.22	1.01634e+06	140191	8000	210199	26325.5	399426	17700	8000	10924.9	43413.6	8000	20963.6	8810.98	93391.5	8000	30600.5
QC_08	QC	QC	QC	QC	QC	QC	QC	QC	QC	253131	166967	321859	4.15411e+06	156714	163000	229311	792520	33070.1	88000	167000	488137	146312	18854.8	484215	913000	36652.1	227605	364284	495688	1.53008e+06	565179	72835.4	14953.8	1.29702e+06	161494	8000	249580	30323.8	450187	19500	8000	15863.5	39706.4	8000	16949.9	8881.65	113270	8000	25246.5
QC_09	QC	QC	QC	QC	QC	QC	QC	QC	QC	252978	166297	347448	4.28062e+06	158115	137000	245867	826954	35181.5	75800	180000	496072	146026	15221.4	525864	975458	19332.9	234990	366277	564637	1.6929e+06	612773	61982.4	9573.38	1.35846e+06	106991	8000	168078	17528.7	300844	8000	8000	9137.41	16431	8000	8456.75	8000	66344.1	8000	21240.2
QC_10	QC	QC	QC	QC	QC	QC	QC	QC	QC	260909	180773	342110	4.60071e+06	164022	137000	250542	865570	45070.7	86700	150000	527102	147248	14644.1	528777	1.05225e+06	26724.5	258618	389283	558912	1.7847e+06	631711	68617.7	15994.4	1.4111e+06	76601	8000	136295	14187.7	229454	8000	8000	8000	12307.5	8000	8000	8000	40264.8	8000	13548.8
QC_11	QC	QC	QC	QC	QC	QC	QC	QC	QC	267463	176532	389056	4.6272e+06	187766	151000	294119	903639	47878.8	93000	186000	532407	158078	26305.9	600991	1.01207e+06	24674.1	257527	399388	625685	1.91372e+06	624842	72542.4	13935.3	1.4087e+06	151236	8000	246454	45076.7	456469	19000	8000	15009.3	44436.3	8000	17125.8	10074.6	120114	8000	34581.5
QC_12	QC	QC	QC	QC	QC	QC	QC	QC	QC	228823	133865	329068	3.79336e+06	149678	126000	230755	720354	31034.7	70000	160000	431855	128189	20455.5	483893	851612	16568.1	222928	315414	547538	1.57449e+06	506581	58323.3	9342.3	1.19415e+06	133008	8000	219202	31584.2	385791	14600	8000	9896.9	34410.5	8000	11228.1	10233.2	91833	8000	25621.1
QC_13	QC	QC	QC	QC	QC	QC	QC	QC	QC	236578	158906	346125	3.91604e+06	148536	140000	250883	772043	38584.7	77000	164000	451489	133044	26530.1	514301	858665	27269.4	241831	328318	608357	1.69957e+06	534441	61540.3	8000	1.24103e+06	128285	8000	195732	42577.5	366381	10500	8000	12519.6	43149.9	8000	12608.8	9286.19	92681.7	8000	22129.6
QC_14	QC	QC	QC	QC	QC	QC	QC	QC	QC	191571	117868	295578	3.23189e+06	120092	102000	213314	616392	16358.2	72800	159000	375484	105951	10969.8	452876	717434	16470.2	217203	272169	547386	1.43036e+06	451972	50341.8	8000	1.083e+06	126807	8000	190133	25646.2	339063	8300	8000	9089.46	28906.4	8000	13222.7	8000	78013.6	8000	18829.4
QC_15	QC	QC	QC	QC	QC	QC	QC	QC	QC	338679	220311	468396	5.5181e+06	204231	180000	328126	1.00799e+06	45747.4	99000	213000	611368	174564	36117.2	687096	1.1499e+06	36505.2	299671	442413	771642	2.14697e+06	670787	95732.5	19142.7	1.85489e+06	157353	8000	244757	33803.1	463561	20900	8000	14698.2	47310.3	8000	16540.2	18444.9	104736	8000	23104
QC_16	QC	QC	QC	QC	QC	QC	QC	QC	QC	253042	161767	359158	4.32197e+06	160572	135000	259628	811077	27387.9	75600	175000	501514	131812	26059	511855	942729	26127.1	247352	356383	620854	1.70986e+06	563685	69991.6	9432.54	1.36844e+06	140649	8000	227700	33287	413725	17000	8000	12277	43389	8000	13537	12354.7	94649.7	8000	27392.2
QC_17	QC	QC	QC	QC	QC	QC	QC	QC	QC	240863	146853	344175	3.91667e+06	143195	127000	239112	754534	29754.6	80200	181000	456539	136573	25361.3	507242	867692	22595.2	230666	332068	569742	1.62284e+06	541120	58996.2	8000	1.25983e+06	115437	8000	198931	18130.1	336652	12700	8000	10200	27957.2	8000	9712.38	8000	71491.1	8000	17604
QC_18	QC	QC	QC	QC	QC	QC	QC	QC	QC	382439	246596	579122	6.45017e+06	229780	194000	426329	1.19703e+06	56380.8	113000	280000	704702	198656	63013.2	819556	1.27246e+06	55502.2	374186	468563	966647	2.60748e+06	766470	112463	20727.1	1.92287e+06	135297	8000	222587	33148.7	387048	17000	8000	16400	28276.5	8000	13000	8000	91661.6	8000	28186.1
KCS_001	T	M	P	70.7	28.3	papRCC	T1b	Gx	N0M0	184806	117615	203482	3.81381e+06	152784	194000	123000	589074	23125.4	79400	112000	381669	105241	8046.92	340705	879478	47974.3	165931	316431	333539	1.41539e+06	644350	53820.2	13364.1	1.04519e+06	214936	10363.9	316826	46681.2	431392	24300	8000	9300	60687.3	8000	18986	10767.4	125055	8000	29962.7
KCS_002	T	M	PT	80.1	27	ccRCC	pT3a	G2	N0M0	143065	88482.7	118079	1.56388e+06	57121.3	69200	76800	313833	9616.13	44600	65300	205881	68829.9	8000	198640	404539	8000	94945.2	174928	164404	548464	283066	9947.79	8000	1.09561e+06	141281	8000	156399	15484.6	263836	8000	8000	8000	16616.5	8000	11314.5	8000	60744.2	8000	8000
KCS_003	T	M	PT	59.2	27.7	ccRCC	pT1a	G2	N0M0	214159	171139	221435	3.72993e+06	142381	143000	146000	630336	18000	63100	108000	483004	151993	8000	391518	887536	19283.7	199315	315425	324611	1.18908e+06	550943	36785.3	8000	839699	159000	19313.4	361740	55201	472172	27400	8000	17255.1	65643.3	8000	28103.5	15883.5	132042	8000	26215
KCS_004	T	M	PT	75.5	34.4	ccRCC	pT3a	G2	NxMx	138843	94162.8	251646	3.65461e+06	105457	118000	174321	676117	21800	55000	94600	321560	56281.7	8000	266023	709917	11873.2	103907	215731	288807	1.06597e+06	411758	21178.4	8000	1.30503e+06	172578	8000	127834	13331.5	240894	8000	8000	8000	16280.1	8000	8116.7	8000	57337.8	8000	8000
KCS_005	T	F	P	51.4	15.79	ccRCC	pT3	G4 (sarcomatoid)	N1M1	97361.9	123630	209025	4.93586e+06	189050	165000	169060	1.16992e+06	102041	88000	87000	364174	71655.9	12135.1	278813	797988	40295.1	145267	220313	416647	2.03451e+06	339569	82803.1	8000	1.40438e+06	178753	8000	33676.7	8000	86926.3	8000	8000	8000	8000	8000	8000	8000	8000	8000	10712
KCS_006	T	M	P	82.3	27	papRCC	pT1a	Gx	NxMx	123498	65697.2	151012	2.37965e+06	67855.5	63600	53500	238243	8000	18400	42000	187923	41378.3	8000	211503	440508	10409.5	87408.1	161824	269545	968392	332237	28793.9	8000	1.81443e+06	222288	8000	90064.1	10167.8	161980	8000	8000	8000	8000	8000	8000	8000	18165.3	8000	8242.77
KCS_007	T	F	P	56.3	29	ccRCC	pT1a	G2-4	N0M0	270793	151618	448022	4.76943e+06	201842	165000	379816	1.06633e+06	97980.7	99000	232000	551749	137637	31811.5	706309	1.12852e+06	46611.9	252635	363167	715452	2.02659e+06	735835	78920.7	10150.8	1.15079e+06	159820	9373.52	230867	24751.7	364760	16000	8000	19391.9	72797.8	8000	17278.8	24000	159897	8000	31135.6
KCS_008	T	M	PT	66.4	UNK	ccRCC	pT1b	G2	N0M0	227516	135285	259188	4.35418e+06	167568	140000	147422	694686	24147.7	71200	107000	417339	102318	14319.5	379642	931056	34526.3	175599	340582	425735	1.63372e+06	675219	60684	12879.2	1.34527e+06	154010	8000	147024	16160.8	346983	13100	8000	8000	18019.6	8000	8000	8000	68568.5	8000	8000
KCS_009	T	M	PT	80.9	18.93	ccRCC	pT1b	G2	NxMx	204284	146888	386260	5.55861e+06	178280	193000	245634	776335	10900	87400	180000	481249	108871	33653.7	548483	931057	77662.5	263573	342276	789265	2.32575e+06	646144	95701.8	10790.7	718010	87159.1	24948.9	427638	86048.7	774259	43000	8000	67676.2	86478.7	19126.9	45593.3	33958.1	164330	8000	85015.2
KCS_010	T	F	PT	36.9	33	ccRCC	pT1a	G2	N0M0	189834	115393	461173	3.04989e+06	132584	130000	384058	773689	82207.4	76000	189000	339777	98376.2	44195.1	566213	667457	62427.9	222784	248991	710702	1.47839e+06	417938	53789.1	8000	1.43911e+06	187674	11439.1	155668	29026	219283	11000	8000	13209.5	17132	8000	9014.37	8000	43590.6	8000	22560.1
KCS_011	T	M	PT	64.2	32.5	ccRCC	pT3a	G3	N0M0	157186	90272.4	93096.5	2.7743e+06	84006.4	100000	48600	417225	8000	53600	39700	289336	86461.3	8000	142484	634868	8000	55125.5	229693	120929	369401	355669	8000	8000	456562	117748	8000	217885	30030.6	467168	18000	8000	13524.3	43872.1	8000	9646.76	8000	148057	8000	23972.2
KCS_012	T	F	PT	52.6	31.5	ccRCC	pT3a	G3	N0M0	213663	125879	151933	2.6195e+06	115983	100000	105000	550136	22211.5	65200	72900	360738	148007	8000	280851	828815	8201.08	146135	384505	305515	761533	511787	24136.2	10356.1	450080	108243	12744.8	254161	46636.2	516220	32300	8000	46612.2	72327.6	8000	15414.4	15257.3	132521	8000	70137.8
KCS_013	T	M	PT	66.3	27.4	ccRCC	pT2a	G1-2	N0M0	54144.9	28598.2	42870	1.49213e+06	50260.6	38500	236000	275782	8000	20000	22600	164065	25103.5	8000	83443.7	362116	8000	22488.9	121739	104310	346828	234268	8000	8000	513547	115563	8000	133262	8000	198243	8000	8000	18704.9	35450	8000	8000	8000	52533.8	8000	43227.7
KCS_014	T	M	P	63.1	27.3	ccRCC	pT1a	G1-2	N0M0	163443	112965	128927	3.93074e+06	162924	140000	8000	645291	17900	63800	61300	352324	80783.9	46900	219636	762443	8000	101935	271193	308552	778753	449440	8487.09	8000	574181	145340	22457.1	639658	55704.1	1.02858e+06	115464	16200	29068.2	145617	8000	32886.9	52768.6	244042	17642.7	47484.6
KCS_015	T	M	PT	70.5	30.69	ccRCC	pT1b	G2	N0M0	182194	103947	116936	2.85949e+06	93055.4	83700	50000	337263	8000	34000	34400	239806	81088.4	8000	148747	516878	8000	74930.8	224170	148663	551743	345501	8000	8000	837054	139226	8000	184303	21388.7	428894	16000	8000	8618.93	42110.6	8000	8000	11068.6	123751	8000	15510.9
KCS_016	T	M	PT	60.3	35	ccRCC	pT3a	G2	N0M0	113515	57846.1	103725	1.93924e+06	67062.3	64100	76000	451636	13894.7	34600	55200	282521	77465.8	16600	166950	548780	8000	62165.5	229258	125330	510988	356429	8000	8000	1.43466e+06	178420	8000	91295	8000	150576	8000	8000	8000	8540.36	8000	8000	8000	38754.5	8000	8000
KCS_017	T	M	PT	52.9	22.64	ccRCC	pT1b	G2	N0M0	127454	95879.1	247722	3.7902e+06	226333	112000	200983	602007	42621.5	63000	133000	346226	84605.5	16630.4	375345	709723	27849.9	177493	260708	575593	1.70138e+06	517624	54470.1	9106.17	1.06285e+06	129541	8000	111393	8323.57	341267	23300	8000	8443.49	24599.5	8000	8000	8000	72469.7	8000	25999.7
KCS_018	T	F	PT	65.7	UNK	ccRCC	pT1b	G2	N0M0	170324	134110	336028	4.15711e+06	154858	142000	248583	696763	24092.8	91900	165000	510094	137203	30309.3	583672	1.00096e+06	51914	302308	398689	731100	2.08058e+06	662295	68420.7	17359.8	639789	115946	18917.3	308875	79129.5	838162	41500	8000	25723.1	48348.9	8000	56081.6	11659.1	226502	8000	60302.3
KCS_019	T	M	PT	77.5	22.99	papRCC	pT2a	G2	N0M0	200675	120824	401818	4.41576e+06	174671	113000	173337	447457	8155.48	39000	113000	275592	65542.5	15827.6	445670	570964	34711.3	209812	256224	731625	1.77279e+06	400098	49423.2	8000	1.3684e+06	85223.7	8000	182213	11962.2	303248	13100	8000	8000	14341.5	8000	8000	8000	48873.7	8000	10357.1
KCS_020	T	M	PT	65.7	28.38	ccRCC	pT3a	G2	N1M1	119863	82498.1	198835	3.86323e+06	108290	99700	118041	570276	8000	65600	96600	380022	86839.9	8000	331420	875078	15852.7	144758	318438	361697	1.3836e+06	589780	19634.3	8000	1.29999e+06	131575	8000	138822	21671.7	361346	8000	8000	8000	15575.9	8000	10786.5	8000	85408.3	8000	10473.6
KCS_021	T	M	PUT	51.2	UNK	ccRCC	pT1a	G2	N0M0	206924	121991	241092	3.26506e+06	117908	113000	173000	591837	19400	73000	125000	379844	142424	13460.1	408238	902126	14845.2	200795	383891	401327	1.27317e+06	605624	32510.2	8767.34	772173	118797	8000	267759	40048.1	339144	28900	8000	17741.7	63282.9	8000	11533.8	14263.1	108620	8000	25046.5
KCS_022	T	M	PUT	81.2	23.88	ccRCC	pT1a	G1	N0M0	285221	175176	313465	4.31825e+06	148867	154000	247507	885889	19900	101000	172000	550091	154359	37271.3	560835	851499	42753.9	260578	340699	718994	2.05051e+06	578703	100541	14176.6	674168	111052	10925.8	193781	47021.8	345290	9700	8000	17000.3	22741.7	8000	23658.8	8580.68	69123	8000	44711.4
KCS_023	T	F	PUT	81	28.04	ccRCC	pT2b	G2-3	N0M1	262518	212959	403448	5.03612e+06	186408	218000	393600	1.32513e+06	96555.2	147000	216000	685268	206975	36730	629999	1.25154e+06	40180.1	275536	466419	591417	1.66473e+06	685380	82861.6	19706.3	607141	103000	21832.7	250855	48456.1	419918	9900	8000	44051.2	61073	9026.85	36375.3	11156	102680	8000	65761.3
KCS_024	T	M	PUT	54.9	27.08	ccRCC	pT2a	G2	N0M0	258821	181436	408846	6.19688e+06	208377	194000	221000	753623	21200	105000	213000	711877	191643	36400	667247	1.35622e+06	54433.7	329064	542185	757332	2.4763e+06	912308	125399	36926.2	824698	83919	8312.03	211991	32432.7	494724	17600	8000	31130.1	48232.8	8000	21998.2	9435.85	94454.2	8000	70973.9
KCS_025	T	M	PUT	61.5	24.69	ccRCC	pT1b	G2	N0M0	230093	128845	400133	5.05955e+06	177054	150000	241000	757967	21600	99800	215000	530263	125857	27800	596262	990831	61010.4	257442	369891	786970	2.36909e+06	682232	84123.4	10517.2	437538	81485.4	16556.8	259923	60857.6	530689	31900	8000	27900	51156	8000	31192.5	8000	133068	8000	67244.2
KCS_026	T	M	PUT	64.7	21.33	ccRCC	pT1a	G2	N0M0	298660	183611	347365	4.41826e+06	122005	144000	173000	504923	8000	75700	130000	400082	155670	29899.4	542063	843928	41127.4	299738	401128	647338	1.68651e+06	562836	70919.4	17448.4	1.19656e+06	128808	8000	137539	38191.4	512659	8000	8000	8000	17957	8000	25898.2	8475.95	113571	8000	38419.6
KCS_027	T	F	PU	62.9	26.67	ccRCC	pT1b	G2	N0M0	253417	185000	548978	6.48818e+06	179824	206000	327041	1.08994e+06	20900	109000	265000	561206	138978	40093.3	671764	959954	72644	326469	373944	1.00656e+06	2.55358e+06	527044	80739.5	8000	656492	142443	109579	789558	184114	1.20293e+06	67500	20449.7	115151	128247	31334.2	120518	39878.9	209201	8000	118846
KCS_028	T	M	PUT	54.9	22.64	ccRCC	pT1b	G2	N0M0	224016	134738	331566	4.15319e+06	154409	123000	170000	561648	12000	63000	145000	383498	118342	13317.8	475769	830327	28531.2	225532	339117	517948	1.53002e+06	548213	42349.2	8000	493112	94239.6	54240.7	472963	118089	915666	78000	16100	52460.4	98270.8	17688.3	96531.1	39631	304499	14400	85997.7
KCS_029	T	F	PU	72.8	20.7	ccRCC	pT2a	G3	N0M0	230220	141111	370638	4.02096e+06	149547	124000	195796	505977	8000	64000	180000	379517	104714	17500	465404	610823	28341.6	230213	231355	588091	1.58381e+06	340725	46946.9	8000	826824	131359	43023.4	491144	89843.4	812697	82000	8000	59593	111074	12845.7	73403.6	35524.5	216911	11600	112225
KCS_030	T	F	PUT	69.9	26.81	ccRCC	pT1a	G2	N0M0	234151	143291	382648	4.43804e+06	205826	133000	258759	844989	37082.4	104000	213000	604179	185505	17803.5	591731	1.05788e+06	39244.2	275939	433854	605072	1.93961e+06	639844	70002.3	12311.9	669882	89343.5	19533.5	332357	58008.2	704271	38000	8000	19991.9	73910	8000	35215.3	18749.1	181444	8000	28013.5
KCS_031	T	M	PUT	32.8	24.8	ccRCC	pT3a	G3	N0M0	224328	139465	316668	4.68979e+06	156341	144000	245351	1.0155e+06	44013.7	92700	174000	607649	129517	28543.5	558786	1.24845e+06	45461.1	221494	364633	609853	2.42699e+06	814009	83964.5	17976.6	1.2592e+06	144364	8308.9	217636	20674	399555	8000	8000	17589.8	39294.7	8000	17751.3	8000	97342	8000	51897.3
KCS_032	T	F	PUT	68.2	19.2	ccRCC	pT1b	G1-2	N0M0	262216	208815	436914	6.05993e+06	239801	194000	278852	906205	37930.9	120000	226000	590340	173084	45833.5	674012	1.09449e+06	42343.9	316383	460871	828425	2.47389e+06	677766	114398	18718.1	634113	86071	9837.54	302732	34767.7	566309	39200	9000	49869.1	70993.2	11131	24459.4	26807.4	127682	8000	88811.2
KCS_033	T	M	PUT	71.1	24.84	ccRCC	pT1b	G4 (sarcomatoid)	N0M0	285239	173140	348407	4.23968e+06	126114	163000	288778	901864	22000	103000	204000	665933	190413	42427	645793	1.01949e+06	36137.9	309845	412776	656148	2.00864e+06	600184	102799	19215.3	1.23936e+06	131027	11383.9	234632	34319.6	398933	22400	8000	17163.3	40945.3	8000	21359.3	9908.52	102357	8000	45735.6
KCS_034	T	M	PUT	48.1	27.77	ccRCC	pT3a	G2	N0M0	157536	91688.6	343460	4.2199e+06	144311	119000	259163	790482	15200	76000	181000	400241	72213.5	30337.6	525186	733727	55863.8	194902	239726	908564	2.64642e+06	586877	78861.1	8000	892288	113629	22990.9	258303	49692.1	469571	8000	8000	23823.8	37382	8000	23754.4	11785.2	92938.1	8000	57031.6
KCS_035	T	M	PU	51.8	37.01	ccRCC	pT3a	G4 (sarcomatoid)	N1M1	188063	208293	745007	6.40648e+06	178669	226970	660106	1.69151e+06	97551.1	118000	270000	465051	77659.1	66726.8	594372	683371	72115	261653	207380	1.26885e+06	3.0149e+06	400682	106539	8000	1.53051e+06	139511	8000	49926.2	8000	102774	8000	8000	8000	8000	8000	8000	8000	8000	8000	15279.2
KCS_036	T	M	PUT	75.1	24.91	papRCC	pT3a	G3	N0M0	218786	141577	477175	5.86723e+06	194809	191000	258335	792709	34900	91500	185000	513007	115315	41677.2	727638	1.13322e+06	69139	269833	369305	903013	2.52275e+06	795568	87238.9	17688.7	1.18271e+06	103056	11560.2	164414	35471.1	341255	11200	8000	14903.9	18000	8000	13577.4	8000	68059.3	8000	30819.9
KCS_037	T	F	PUT	59.7	31.64	ccRCC	pT3b	G3	N0M0	322834	261814	549644	5.97947e+06	147823	268309	467537	1.29137e+06	42400	158000	295000	600957	189113	97536.6	734334	981221	106342	374615	370887	887882	2.47049e+06	438779	168731	17959.1	1.30418e+06	274514	8686.01	260489	54421.6	595604	29300	8000	70297	63374.3	8000	32773.3	11106.5	104469	8000	133826
KCS_038	T	M	PU	66.3	32.51	ccRCC	pT1b	G2	N0M0	134159	76150.2	228785	2.85389e+06	105997	90600	167437	598675	41454.5	50500	111000	372281	75562.3	8000	315664	695958	10011.8	126735	231786	301823	1.15734e+06	435900	23316.3	8000	1.28852e+06	170643	10592	269676	19487.2	382604	15700	8000	8757.17	41137.2	8000	20209.1	8000	109980	8000	10068.8
KCS_039	T	F	PU	73	28.01	ccRCC	pT1a	G2	N0M0	220823	122413	555085	4.16389e+06	137511	134000	426261	882320	42435.3	90500	244000	500131	149425	49404.1	791901	1.1882e+06	39121	307078	444395	845677	1.87037e+06	659490	36411.6	8000	985650	170500	14340.9	177321	53844.3	420184	20700	8000	14863.9	36368.2	8000	33806.3	8000	118104	8000	26525.7
KCS_040	T	M	PUT	50.4	27.47	ccRCC	pT3a	G2-3	N0M0	224835	170440	317235	3.55704e+06	122713	142000	225000	612223	10300	97400	180000	447418	175136	42309.4	632157	911616	44360.7	355438	444618	704981	2.0136e+06	540376	107334	14166.4	999396	115440	8000	96012.4	9140.69	180541	8000	8000	8000	9871.32	8000	9057.29	8000	52123	8000	17675.5
KCS_041	T	F	PUT	72.6	31.25	ccRCC	pT1a	G2	N0M0	205705	120721	356240	3.29783e+06	119873	99000	229142	578852	15062.3	59700	164000	382001	97896.3	25099.3	473013	611368	21922.8	210802	235019	618169	1.50725e+06	368012	54166.9	8000	816842	134228	8000	142662	33058.5	311745	8000	8000	8000	21109.2	8000	14316.1	8000	69331.3	8000	13582.1
KCS_042	T	M	PUT	74.9	30.04	oncocytic adenoma	n.d.	n.d.	n.d.	71492.1	59414	185654	2.32602e+06	111085	66200	157517	433465	34885.8	34500	89400	227915	43936.5	8000	267584	399519	8464.68	119826	164777	384618	1.18169e+06	301940	27494.3	8000	1.9087e+06	164914	9021.96	197817	18323.2	216561	8000	8000	8000	15935.5	8000	8000	8000	25356	8000	8000
KCS_043	T	M	PUT	50.2	33.21	ccRCC	pT3a	G2	N1M1	113012	62681	269411	3.12029e+06	108645	81500	178668	553689	16338.3	50700	122000	336402	50333.6	8000	331603	655608	16810.5	121770	202794	451290	1.5227e+06	449457	31238	8000	1.3599e+06	168860	8000	133522	14258	349594	8000	8000	10935.6	43095.9	8000	20950.8	8000	116663	8000	45692.7
KCS_044	T	M	PUT	69.4	32.11	ccRCC	pT1a	G1	N0M0	114028	61114.7	210296	2.31599e+06	83121.6	64700	119532	333147	8000	19200	81100	263342	52116	8000	292732	514992	8000	105190	163905	317916	887340	304862	15863.4	8000	1.97254e+06	173392	8000	83106.5	9340.67	200818	8000	8000	8000	8000	8000	8000	8000	22729	8000	8000
KCS_045	T	M	PUT	80.9	23.66	ccRCC	pT3a	G3	N0M0	149079	90135	234412	3.02548e+06	96083.4	91500	154975	501270	14726.4	55200	110000	326234	78464.3	16925.9	340405	571884	11804.2	154725	217079	400506	1.18738e+06	344535	30338.3	8000	1.36917e+06	141919	8000	126230	8787.8	254797	8000	8000	8000	8000	8000	9716.05	8000	64601.2	8000	8409.3
KCS_046	T	F	PUT	67.1	UNK	ccRCC	pT3a	G3	N0M0	87605.2	41035.6	194376	1.7824e+06	43352.4	42400	92898.2	240789	8000	11300	62600	134339	19991.5	8000	215936	297933	8000	85296.7	114491	321246	750455	208705	17212.7	8000	2.17424e+06	167731	8000	35327.3	9961.85	118481	8000	8000	8000	8000	8000	8000	8000	8000	8000	8000
KCS_047	T	M	PUT	44.7	35.65	ccRCC	pT1b	G1	N0M0	248119	163501	315921	3.26514e+06	117695	14600	188000	531415	12114.6	96000	141000	536867	166158	17200	563830	1.24167e+06	30555.4	212854	367823	386793	1.32914e+06	670411	70906.4	24890	565370	78599.2	9353.38	240861	44984.3	613095	50000	8000	13500	70862.6	8000	41904.8	15056.8	202412	8000	12102.9
KCS_048	T	F	PUT	64	29.74	ccRCC	pT3a	G3	N0M0	244068	143073	524776	4.34814e+06	195786	157000	365881	865753	62130.8	110000	248000	535733	125896	47035	680561	1.00306e+06	61172.5	266691	339060	861946	2.21016e+06	583613	89417.2	8000	708575	108814	20309.8	269211	62611	470326	37800	8000	45975.3	66609.3	8000	30870.3	18435.8	130423	8000	92681.4
KCS_049	T	M	PUT	70.7	31.02	ccRCC	pT3a	G3	N0M0	199581	145230	221325	2.95794e+06	131902	131000	174777	601285	32887.1	71500	115000	309456	93858.6	22700	357241	546621	21203.9	194035	255667	414721	1.40692e+06	361774	87668.1	11433.3	2.09879e+06	164355	8000	87250.5	8000	201088	8000	8000	8000	8000	8000	8000	8000	11122.2	8000	8881.66
KCS_050	T	F	PUT	78	27.48	ccRCC	pT1b	G2	N0M0	257606	132045	909628	6.53704e+06	243557	168000	664841	1.57751e+06	147415	97100	290000	489637	49718.5	75228.4	622023	770428	65318.7	179054	173327	1.31621e+06	2.89346e+06	398899	90799.5	8000	1.29178e+06	103206	8000	39843.4	8000	129345	8000	8000	8000	8000	8000	8000	8000	8000	8000	24121.3
KCS_051	T	M	PUT	59.2	24.78	ccRCC	pT3a	G4 (sarcomatoid)	NxM0	166886	163165	294798	3.76027e+06	94896.4	169425	321797	1.0999e+06	43400	111406	169000	420030	101262	40932.6	439638	630894	36258.2	196439	208124	512150	1.66207e+06	283893	110118	8000	2.18035e+06	164821	8000	54072.5	8000	120929	8000	8000	8000	8000	8000	8000	8000	8000	8000	8000
KCS_052	T	M	PUT	77	24.76	ccRCC	pT3a	G3	N0M0	112467	96407.9	155115	2.43075e+06	79977.2	88993.5	109226	448281	14256.4	46000	61900	212688	43478.4	8000	202604	348434	11359.1	113534	130174	266195	923882	188052	41555.7	8000	2.95696e+06	171367	8000	21594.2	8000	63891.3	8000	8000	8000	8000	8000	8000	8000	8000	8000	8000
KCS_053	T	M	PUT	58.3	23.67	ccRCC	pT1a	G3	N0M0	155238	130247	394127	5.52977e+06	190317	170000	282082	769213	24100	91300	168000	405483	90711.1	38604.2	562700	841920	64425.3	239170	303750	892141	2.52086e+06	542100	71678.8	8000	800894	112126	8000	273069	50632.1	708537	41000	8000	15000	38600	8000	37057.4	9000	143003	8000	48708.1
KCS_054	T	M	PU	67.9	35.64	ccRCC	pT1a	G2	N0M0	181547	111757	435695	4.06685e+06	161969	130000	285755	757161	63051.3	76000	182000	443127	90525.1	35002.3	484852	699085	40935.3	201593	273187	744585	2.16813e+06	490961	83786.7	8000	1.46326e+06	92620.5	8000	88273.9	8000	188083	8000	8000	8000	8000	8000	8000	8000	39000	8000	8000
KCS_055	T	M	PUT	40.5	27.45	ccRCC	pT1b	G1	N0M0	185386	109039	307243	3.41999e+06	99347	104000	224371	673557	27319.9	64100	170000	479282	114091	19518.6	529924	790806	24853.6	212608	290569	575753	1.73646e+06	429450	65812.5	8000	2.27825e+06	137541	8000	106888	8000	195787	8000	8000	8000	13600	8000	8000	8000	60763.6	8000	8000
KCS_056	T	F	PUT	44.4	21.45	ccRCC	pT1b	G1	N0M0	273424	227917	379269	5.70506e+06	194734	204000	344291	1.26249e+06	52839.2	136000	226000	724956	214329	52386.1	813737	1.32878e+06	64167.2	391065	540010	858656	2.64e+06	821920	102936	23986.9	905634	157473	13237.7	415322	84337	793537	61700	8000	47419.8	128813	16032.4	70378.9	50595.1	204215	8000	67542
KCS_057	T	M	PUT	77.2	31.14	ccRCC	pT1b	G2	N0M0	166446	107215	278456	3.5934e+06	137824	113000	246960	794202	39410.6	67400	134000	369469	87147.8	15000	393829	682521	20111.9	184570	271447	500514	1.60242e+06	430106	74999.1	8000	1.17442e+06	119982	8000	84239.3	8000	151142	8000	8000	17894.2	17087.4	8000	8000	8000	29676	8000	61278.6
KCS_058	T	M	PUT	64.1	29.07	ccRCC	pT2b	G3	N0M0	256503	180823	347182	5.06196e+06	191544	186000	339191	1.15926e+06	48039.2	132000	237000	710311	179487	51700	675312	1.35556e+06	47748	297618	465138	824300	2.56943e+06	849114	114188	29861.8	735263	82404.7	11619.4	215125	27337.6	368006	8000	12000	148855	132426	16602.6	28016.8	38676	119809	8000	189110
KCS_059	T	F	PUT	66.6	30.12	chRCC	pT2a	Gx	N0M0	216329	134405	331552	3.95751e+06	170066	119000	233830	746261	29623.9	81500	144000	489626	149543	13478.3	501529	947200	24785.3	243360	375189	554910	1.47502e+06	555077	46808.7	8000	857337	121781	8000	230918	34515.2	339597	23000	8000	13732.1	42575	8000	20548.5	8000	101278	8000	22587
KCS_060	T	F	PUT	79.9	24.34	ccRCC	pT3a	G4	N0M0	137339	130362	350306	5.17122e+06	116686	118062	282390	1.0226e+06	14300	53000	120000	262277	42155.1	20388.8	290448	422256	20499.9	147894	143278	501151	1.44831e+06	195849	25919.6	8000	1.6382e+06	158529	8000	86054.3	21405	152083	8000	8000	8000	8000	8000	8000	8000	8000	8000	19076.8
KCS_061	T	M	PUT	62.7	23.41	ccRCC	pT3a	G3	NxM1	201238	170298	300111	4.66236e+06	104011	134584	247974	1.07621e+06	30600	87300	140000	436904	100833	28791	400595	720005	17341	199217	228285	489262	1.65003e+06	326545	68126.1	8000	1.56632e+06	123211	8000	134704	19819	211040	8000	8000	23562.9	9203.56	8000	15392.3	8000	29459.4	8000	98715.5
KCS_062	T	M	PUT	67.9	33.9	chRCC	pT2a	Gx	N0M0	157711	64966.8	292133	3.66852e+06	127932	78900	188301	575168	19448.4	48000	140000	361018	56129.6	8056.01	407210	755208	12930.1	134763	227009	546081	1.66996e+06	510361	25673.2	8000	1.73162e+06	112290	8000	161443	8000	233559	8000	8000	8000	19203.8	8000	8000	8000	60227.2	8000	9301.55
KCS_063	T	M	PUT	53.2	30.74	eosinophilic granular cell subform + ccRCC residuum	pT1b	G3	N0M0	122789	82372.3	253104	3.82265e+06	105678	87700	157206	700457	17000	43000	104000	319182	47637.2	8000	333716	771464	16116.7	137497	239940	493431	1.8735e+06	458961	38972	8000	1.68491e+06	128405	8000	44523.5	8000	86178	8000	8000	8000	8000	8000	8000	8000	8000	8000	8000
KCS_064	T	M	PUT	68.1	25.35	ccRCC	pT3a	G4 (sarcomatoid)	NxM1	290547	204927	292074	4.83727e+06	164635	176000	226708	1.08877e+06	65783.3	116000	130000	476917	122238	35700	488157	901449	31952.1	221289	289325	530285	2.00688e+06	518414	121877	17087	1.42654e+06	141391	8000	145178	26114.3	256061	21600	8000	8000	8000	8000	8000	8000	49341	8000	13852.7
KCS_065	T	M	PUT	47.3	30.09	ccRCC	pT2a	G3	N0M0	160784	86687.7	301237	2.97542e+06	129630	88100	253139	757728	61437.1	55900	130000	357497	68700.4	10554.5	369341	688121	12721.4	168781	255894	486988	1.53726e+06	443904	35789.3	8000	1.37034e+06	115083	8000	78650	8000	158157	8000	8000	8000	8000	8000	8000	8000	43799	8000	13402.5
KCS_066	T	M	PUT	64.1	22.09	ccRCC	pT3a	G4	N0M1	224645	83327.2	274387	3.38331e+06	129855	62900	123647	480514	11277.4	28700	90500	281397	42241.1	8753.9	336194	517557	8000	108319	141460	412141	1.37042e+06	339105	21778.7	8000	1.59832e+06	128675	8000	191634	16804.9	286047	8000	8000	8000	12132.5	8000	8000	8000	38464.6	8000	15211.1
KCS_067	T	M	PUT	58.6	17.87	ccRCC	pT3a	G1-2	N0M0	284600	206061	373437	6.01156e+06	222688	149973	219716	812447	58831	85000	133000	425043	103359	47725.1	519121	667312	50048.7	244726	255136	747526	2.62875e+06	476768	89578.7	8000	1.12908e+06	121823	9576.72	234416	22335.4	357036	22300	8000	12324.9	26067	8000	22299.5	8000	50035.2	8000	88860.5
KCS_068	T	F	PUT	58.6	23.8	ccRCC	pT1a	G1	N0M0	470824	254185	413210	5.3141e+06	260933	187000	285767	1.1281e+06	82752.5	117000	227000	786980	266981	70285.7	794737	1.21377e+06	45825.8	374804	537647	789401	2.42557e+06	751952	143130	31445.8	1.82038e+06	108444	8000	130689	13074.8	296093	8000	8000	8000	11754.6	8000	8000	8000	32441.2	8000	15464.4
KCS_069	T	M	PUT	59.9	24.54	ccRCC	pT3a	G2	N0M0	260631	149822	396476	5.38481e+06	162627	156000	325124	1.19374e+06	52906.3	100000	200000	656909	140332	22407.1	579629	1.12871e+06	42756.1	245562	366908	729453	2.477e+06	798435	88199.6	12932.5	1.09296e+06	119791	16164.1	288242	30601.1	464756	12000	8000	45843.7	72648.6	8000	27653.1	10360.6	118147	8000	70073.8
KCS_070	T	M	PU	56.1	26.6	ccRCC	pT1b	G2	N0M0	270657	138375	406861	4.00602e+06	144928	140000	255482	738423	25881.2	82800	186000	512193	140578	28719.7	560481	1.05428e+06	38840.7	269339	406200	603773	1.87233e+06	722899	83275.2	13940.8	1.43941e+06	198534	19264.1	342975	68273.8	635795	58000	8000	22352	86645.4	10000	17014.7	31555.1	158988	8000	30166.1
KCS_071	T	M	PU	61.7	22.09	ccRCC	pT3a	G3	N0M0	156965	112083	345249	4.0649e+06	140127	125000	283618	813876	38261.5	90000	200000	440170	76516.6	30282.2	502221	738955	35808.6	192707	216768	740085	2.13653e+06	512181	81778.5	8000	1.05876e+06	159384	23273.8	300423	44021.1	472254	17000	8000	41001.3	35589.1	8472.27	27892.5	8656.87	86793.6	8000	191806
KCS_072	T	F	PUT	57.1	24.03	chRCC	pT2b	G3-4	N0M0	162992	131479	360503	4.09705e+06	125628	142000	327392	889324	10116.2	82800	204000	380000	81789.5	19218.5	452137	708314	21200.4	193742	248342	615856	1.57837e+06	407286	49873.6	8000	1.19955e+06	164342	8000	123925	25747.7	251631	10000	8000	8000	8000	8000	8000	8000	43119	8000	8952.07
KCS_073	T	M	PUT	69	29.64	papRCC	pT2a	Gx	N0M0	185398	143764	364776	4.11252e+06	144626	162000	316264	974119	47300.2	120000	250000	530882	139726	36372.7	584152	921867	41501.9	255026	321079	695367	1.8407e+06	427374	76518.7	8000	510411	125168	35990.9	460312	104925	1.05522e+06	71500	11000	26952.7	73998	8000	75024.9	13289.3	251227	11000	43266.4
KCS_074	T	M	PUT	71.9	21.72	ccRCC	pT3a	G3	N1M0	140161	151023	211680	5.83146e+06	158509	160000	189222	1.21978e+06	34100	90000	100000	464919	62264.2	18500	345667	848665	31865.3	152345	213542	504290	2.56802e+06	459509	92948.8	8000	1.33528e+06	157825	8000	77195.2	8000	181668	8000	8000	8000	8000	8000	8000	8000	8000	8000	8000
KCS_075	T	M	PUT	75.7	26.23	ccRCC	pT2a	G3	N0M0	215990	157163	353578	4.44129e+06	171483	143000	232131	698218	16400	74600	176000	471529	134412	27572.6	538279	994967	28718.1	261206	374251	615595	1.80214e+06	610348	66679.3	9345.79	861219	120065	8000	197496	34087.9	358389	23800	8000	22192.5	48462.2	8000	11044.4	8000	80754.6	8000	51897.8
KCS_076	T	M	PUT	61.1	27.64	ccRCC	pT3a	G3	N0M0	131935	103491	298562	3.47832e+06	147107	115000	238962	613081	10000	65500	136000	292248	56672.7	12700	339226	592811	11178.5	155975	206554	511850	1.39267e+06	356000	43976.4	8000	897393	134216	17119.5	326321	55023.5	522580	49000	8000	73268.3	117418	18309.4	23923.6	32517.8	157362	8000	121443
KCS_077	T	M	PUT	69.9	25.15	ccRCC	pT1b	G2	N0M0	206935	114028	297608	3.65285e+06	116252	100000	179920	506887	9625.75	54000	133000	311528	74471.8	8000	343776	601652	8564.08	148327	193970	405601	1.11737e+06	364480	29981.1	8000	1.19425e+06	145975	8000	248569	47140.9	562225	22000	8000	8000	32347.5	8000	14564.3	8000	119446	8000	14989.9
KCS_078	T	M	PUT	55.3	28.53	ccRCC	pT3a	G4 (sarcomatoid)	N2M0	164285	87361.5	291621	2.75056e+06	70733.6	86300	155712	437475	9000	52000	120000	333985	82021.4	20896.8	402913	660410	23863.9	158537	203887	577045	1.54939e+06	445084	32258.9	8000	1.00907e+06	120921	8000	167400	27763.8	243272	8000	8000	8000	15587.5	8000	18213.2	8000	52316.2	8000	10421.6
KCS_079	T	F	PU	73.3	36.39	ccRCC	pT3a	G4 (sarcomatoid)	N0M1	245235	214356	409143	4.28646e+06	170926	197244	359443	1.21265e+06	121861	117000	167000	372654	114488	33429.7	405159	664496	33562.9	210705	253770	491849	1.35514e+06	283838	78399.2	8000	1.28791e+06	156161	8000	168135	9108.82	258839	8000	8000	8000	11660.2	8000	8000	8000	48167.8	8000	17488.3
KCS_080	T	M	PU	73.5	29.3	ccRCC	pT2a	G3	N0M0	155349	132975	283547	3.3994e+06	110962	130000	224004	666472	31979.2	65000	130000	297326	84640.9	8000	308053	561458	8764.47	155232	222878	336427	916485	278704	18715.9	8000	1.06712e+06	126481	8000	236894	36639.4	584020	26200	8000	8000	27182.3	8000	40334.8	8000	172651	8000	8000
KCS_081	T	M	PU	50.5	34.48	ccRCC	pT1b	G1	N0M0	125417	61564.8	245899	2.0864e+06	69125.5	57700	182760	447035	19299.2	35000	106000	249024	49157.2	8000	279447	517204	8517.18	115660	171700	343444	920227	342971	8127.34	8000	1.25973e+06	112668	8000	59039.3	8000	131153	8000	8000	8000	8000	8000	8000	8000	36873.7	8000	8000
KCS_082	T	F	PU	70.7	44.82	ccRCC	pT3a	G3	N0M0	219499	135822	359446	3.39025e+06	105804	110000	247362	689671	30092.5	69700	163000	392280	103556	14346.3	438729	716247	15347.9	185382	238214	456791	1.18379e+06	369295	38696.5	8000	936780	97241.9	26523.9	316233	48095	478968	15000	8000	23965	55609	8000	38950.8	8000	127666	8000	24254.4
KCS_083	T	F	PU	73.1	21.09	ccRCC	pT3b	G3	N1M0	226438	177204	344295	3.99151e+06	181521	144000	274403	885038	76782.3	90000	160000	391182	102177	36486	435446	696083	26810.1	199452	226441	573596	1.5584e+06	395835	77074	8000	1.06421e+06	133619	19185.4	266200	54222.3	446683	12200	8000	39413.5	42342.2	8000	16287.8	8000	68100.1	8000	165333
KCS_084	T	M	PU	72.7	31.31	ccRCC	pT3a	G3	N1M1	215998	130619	271356	2.9658e+06	127636	120000	193787	670027	43948.1	79000	145000	425903	134045	28500	464741	675743	22839.4	219959	273826	492311	1.34468e+06	433466	89419.1	15512.5	1.34238e+06	147526	8000	170046	24094.9	240995	8000	8000	8000	26079.6	8000	8000	8000	50510	8000	17024.6
KCS_085	T	M	PU	70.4	24.11	ccRCC	pT3a	G3	N2M1	191943	136286	315291	4.6402e+06	159214	141000	235615	856502	26300	84000	165000	457646	104231	26800	487686	843275	41874	214968	291506	613154	1.99669e+06	501741	87862.6	8000	1.31759e+06	142472	8000	175272	17706.6	327695	14600	8000	8000	14800.3	8000	8000	8000	56791.4	8000	13092.6
KCS_086	T	F	PU	75.3	30.86	ccRCC	pT1a	G2	N0M0	218218	138953	309053	3.15088e+06	117008	117000	234762	604662	17821.8	65000	160000	369150	124605	14901.4	469284	692783	19615.8	234566	296028	510539	1.26913e+06	432916	39234.1	8000	1.53551e+06	133106	11368.7	209444	30956.5	301049	10000	8000	15764.5	29605.6	8000	14606.2	8000	69832.4	8000	25141
KCS_087	T	M	PU	40.6	36.57	ccRCC	pT3a	G3	N0M0	107692	78241	248589	2.67547e+06	77291.5	81200	160101	493083	14152.2	46400	110000	316300	76966.7	8000	341382	712643	8007.89	146303	231634	360966	1.13861e+06	436422	20750.8	8000	2.1715e+06	161973	8000	65760.5	8000	153907	8000	8000	8000	8411.8	8000	8000	8000	32295.5	8000	8571.09
KCS_088	T	F	PU	78.8	23.81	ccRCC	pT1a	G2	N0M0	210972	146325	349402	3.51602e+06	125638	112000	217209	547813	8000	53700	156000	396159	132999	19780.2	462658	675440	18482.6	227883	293745	497968	1.2277e+06	439232	44294.1	8000	1.61586e+06	113839	8000	173631	8560.44	244333	8000	8000	8000	18591.3	8000	8000	8000	48794	8000	9942.44
KCS_089	T	M	PU	65.3	25.14	ccRCC	pT1b	G3	N0M0	153195	157729	352403	4.05397e+06	128320	162000	307391	910915	46295.6	100000	190000	386899	88747.7	30453.7	422973	676866	46031.6	227085	255466	595107	1.80239e+06	355369	97738.1	8000	1.27943e+06	112729	8000	101632	8000	218043	8000	8000	8000	8000	8000	8000	8000	27242.5	8000	10275.6
KCS_090	T	M	PU	76.3	34.95	ccRCC	pT3a	G3	N0M0	237283	165554	287529	3.00031e+06	103668	117494	204786	621739	32670.1	65600	126000	336638	109005	12831.4	389062	589089	18929.9	208970	242802	416598	1.16855e+06	335581	63869.5	8000	1.80809e+06	117124	8000	70323	9677.91	155007	8000	8000	8000	8000	8000	8000	8000	13499.3	8000	8000
KCS_091	T	F	PU	68.2	34.53	ccRCC	pT2a	G1	N0M0	27410.9	13378.1	123613	1.05739e+06	10000	15800	85680	219405	8000	8000	48700	122464	13133.3	8000	155689	244002	8000	51946	69464.6	221084	536141	133162	8000	8000	1.52249e+06	136667	8000	28479.2	8000	124879	8000	8000	8000	8000	8000	8000	8000	23071.2	8000	8000
KCS_092	T	F	PU	61.7	34.21	ccRCC	pT2a	G1-2	N0M0	207260	119591	449536	3.48225e+06	125853	120000	371831	835485	47389.9	74500	200000	396366	100941	23128.9	484286	715253	26320.4	203434	239345	637830	1.51083e+06	354290	38143.2	8000	740182	74104.4	12598.4	229831	20945.2	322918	8000	8000	8000	39538.5	8000	14636.7	8000	84842.4	8000	16468
KCS_093	T	M	PU	77.3	20.42	ccRCC	pT3a	G2	N0M0	228067	93466.2	433958	4.71001e+06	119877	101000	167993	434787	8000	32600	98000	233500	22593	17126.4	345768	469910	23641.9	119959	109448	695928	1.80792e+06	329375	35512.1	8000	869336	60158.7	8000	134749	9291.02	218429	8000	8000	8000	8000	8000	8000	8000	32813.3	8000	8104.41
KCS_094	T	M	PU	36.1	24.06	ccRCC	pT1b	G2	N0M0	84434.9	45099.1	139172	1.89401e+06	52800	42600	94015.8	289990	8000	14900	62000	202179	32968	8000	224446	393927	8000	92207.8	146565	299778	986759	259690	8000	8000	1.61091e+06	175127	8000	65479.5	8000	199891	8000	8000	8000	8000	8000	8000	8000	42256.5	8000	8000
KCS_095	T	M	PU	55.7	26.12	ccRCC	pT2b	G2	N0M0	246799	113882	288758	3.85664e+06	147373	114000	176882	595136	24000	63000	110000	381754	83764.5	17989.3	431778	825682	15897.4	155185	246937	532205	1.74714e+06	656145	49817.2	8000	390907	61695.8	17717.1	330604	55980.5	652845	56000	8000	43700	73300	8000	36300	16800	153790	8000	83762.8
KCS_096	T	M	PU	82	26.99	papRCC	pT3a	G1	N0M0	357568	227141	565537	6.43216e+06	235997	201000	382134	1.17843e+06	72382.2	124000	221000	607631	172342	40709.9	700086	1.16815e+06	39988.4	354309	479946	849942	2.37442e+06	738831	116163	30593.6	1.08461e+06	102722	33749.6	444325	69861	546004	46800	8000	24000	73377.4	8000	25600	25289.4	104061	8000	30171.1
KCS_097	T	M	P	70	28.08	ccRCC	pT1a	G3	N0M0	364287	228432	575043	5.44352e+06	158892	218000	443512	1.08411e+06	31300	120000	270000	650304	184061	53809.4	797214	1.00165e+06	57099	361159	368394	960523	2.12277e+06	600473	109346	13908.3	1.16396e+06	136226	29727.6	413405	62296.1	558551	36100	8000	34200	82846.9	9752.8	29700	15110	145767	8000	27659.4
KCS_098	T	M	P	77.8	32.11	ccRCC	pT3a	G2	N0M0	308927	196864	618347	5.6993e+06	194114	162000	370446	932751	25717.9	80000	232000	581643	140048	38706.1	713059	1.00584e+06	37298.7	287639	333700	925469	2.08722e+06	624580	60727.3	8000	1.58138e+06	136639	32547.8	456258	54247.1	650634	54000	8000	23600	89411.9	8000	23694.2	27020	152354	8000	31240.5
KCS_099	T	M	P	72.2	32.14	ccRCC	pT3a	G4 (sarcomatoid)	N1M1	191376	127659	411436	4.33666e+06	167722	141000	392970	1.10985e+06	74647.6	105000	233000	528765	116702	26200	517752	841995	32105.4	256953	318996	670910	1.87211e+06	512936	80571.9	8000	1.76851e+06	111332	8000	80550.6	8000	119609	8000	8000	8000	8000	8000	8000	8000	10326.6	8000	8000
KCS_100	T	M	P	66	27.72	ccRCC	pT1a	G3	N0M0	215935	150027	323953	4.12085e+06	184544	142000	225000	655252	20279.7	83300	165000	535326	133493	32798.1	593681	931596	41415.8	268444	324442	747314	2.21582e+06	615615	100485	9791.63	528433	38786.5	8000	250591	19028.1	384554	32300	8000	12200	42825	8000	10905.9	8000	93022	8000	18040
KCS_101	T	F	P	45.3	18.31	adult cystic nephroma/mcRCC				257949	179951	414182	4.45489e+06	180303	148000	266568	665628	8000	90000	200000	453937	135133	26931.9	586113	802009	31439.4	273147	317238	726398	1.66675e+06	462730	55493.3	8000	715192	55787.3	8000	253792	57755.6	597973	34000	8000	24597.5	55855.3	8000	32045.8	13680.3	136976	8000	31439.1
KCS_102	T	M	P	72.7	29.94	ccRCC	pT1a	G1	N0M0	167645	98399.7	267810	3.40741e+06	155267	88000	180512	559418	27778	45000	105000	344790	68930.6	8000	333818	586713	11186.8	144419	221441	383324	1.32742e+06	380843	45071	8000	1.95063e+06	99537.7	8000	181631	9834.78	261805	8000	8000	8000	19876.8	8000	8000	8000	49789.9	8000	8000
KCS_103	T	M	P	53.8	25.36	ccRCC	pT3a	G3	N1M1	224519	177075	360350	4.76395e+06	144801	8000	292707	837394	21100	100000	205000	502686	147659	40443.4	624429	941857	39087.1	311935	381583	769872	2.09617e+06	534671	93265.6	10098.7	1.7676e+06	110271	8000	107647	8000	147317	8000	8000	8000	8321.15	8000	8000	8000	17588.2	8000	10662.3
KCS_104	T	M	P	55.3	31.48	papRCC	pT1a	G2	N0M0	362227	256228	361990	5.32924e+06	218486	212000	303197	1.03342e+06	65552.3	133000	188000	556146	196780	44292.2	599339	954598	55417.9	307989	412167	651571	1.86955e+06	499270	110778	13284.7	1.0086e+06	62208.6	8000	131082	8000	241253	13200	8000	8000	16173	8000	8000	8000	37497.1	8000	8000
KCS_105	T	F	P	59.6	27.22	ccRCC	pT1a	G2	N0M0	160936	112947	461110	3.90376e+06	127342	99500	369401	837277	30090.2	60000	230000	379602	81240.8	12517	565870	827128	20021.2	235768	274856	735334	1.74414e+06	498531	49688.1	8000	2.34177e+06	131131	8000	69828	9681.5	154209	8000	8000	8000	8000	8000	8000	8000	40709.2	8000	8000
KCS_106	T	M	P	67.3	33.21	ccRCC	pTx	Gx	N0M0	251826	136371	387630	4.25464e+06	146236	106000	257257	776776	42235	60000	160000	404162	101594	18931.5	454736	800151	24146.2	207410	313723	574301	1.81063e+06	606333	70403.7	8883.72	1.63412e+06	59641.1	8000	78844.1	8000	102235	8000	8000	8000	8000	8000	8000	8000	14061	8000	8000
KCS_107	T	F	P	81.7	29.38	ccRCC	pT1b	G2	N0M0	389824	270512	455674	5.35799e+06	178386	186144	315628	950310	34500	132000	233000	600274	207126	56748.8	706759	952675	53812.8	386247	417908	795291	1.86548e+06	509865	126378	16155.7	1.52144e+06	65392.6	8000	88506.6	11350.7	229412	8000	8000	8000	8000	8000	8000	8000	30559.4	8000	13863.4
KCS_108	T	M	P	44.6	28.38	ccRCC	pT1a	G2	N0M0	189889	118319	342363	3.26887e+06	109128	98900	230783	575763	26866.5	50000	160000	405829	114672	22310.9	558198	868448	27402.5	245432	315456	678500	1.82662e+06	620480	54132.1	8000	1.87203e+06	78221	8000	117963	8000	138235	8000	8000	8000	10500	8000	8000	8000	31114.9	8000	8000
KCS_109	T	F	P	60.8	UNK	ccRCC	pT1a	G2	N0M0	255966	102953	385107	4.01956e+06	171038	68500	151558	505913	25712	27800	102000	289448	57391.1	22503.8	407622	603584	13820.6	148312	189744	586450	1.50659e+06	495248	20451.4	8000	2.21319e+06	67436.2	8000	55725.5	8000	28227.5	8000	8000	8000	8000	8000	8000	8000	8000	8000	8000
KCS_110	T	M	P	52.3	31.31	ccRCC	pT1b	G2	NxMx	215746	181149	337238	3.97019e+06	115964	146000	293109	808156	24983.7	93000	186000	493108	142300	26896.7	532758	835453	29561.4	292555	358347	630229	1.84894e+06	527253	87789.3	13584	2.10614e+06	105478	8000	92721.6	8000	195438	8000	8000	8000	8000	8000	8000	8000	22528.9	8000	8000
KCS_111	T	M	PU	70	30.04	ccRCC	pT1a	G1	N0M0	147734	113062	157095	2.78028e+06	96775.6	111000	123232	591875	21915.5	61300	61200	317186	96622.6	8000	276043	679880	18229.1	145850	283352	295464	1.16355e+06	453767	44230.3	8025.06	803925	129243	8000	123962	19194.1	254778	8000	8000	8000	16064.4	8000	8000	8000	42468	8000	11900
KCS_112	T	M	PU	65.5	26.73	ccRCC	pT1a	G1	N0M0	132839	90664.3	238585	3.61688e+06	269752	104000	123685	518858	22684.6	51100	110000	318751	68694	12984.8	384606	569597	27690.4	189037	218807	562576	1.45094e+06	383720	34869	8000	769780	138842	29302.8	408159	80001.7	782515	140719	8000	25116.1	73345	8000	80634.7	24317.3	213232	18676.8	40670.2
KCS_113	T	F	PU	31.4	23.14	ccRCC	pT2a	Gx	N0M0	282124	197603	319860	4.72847e+06	179445	175000	193000	719440	12900	99900	158000	524057	170625	24880.8	558084	903567	50914.1	278369	378715	633477	1.79753e+06	542983	64862.4	8813.66	980712	193026	50208.5	536933	106521	1.02907e+06	86000	12698.1	52068.6	115722	13631.7	85022.7	58529.7	267032	18000	64530.7
KCS_114	T	M	PU	66.7	24.09	papRCC	pT1b	G2	N0M0	161604	67677.8	243754	3.74168e+06	222784	83200	144050	689158	78177.6	51400	87800	363434	53702.1	8544.3	319415	842357	20078.6	113520	258684	418922	1.75698e+06	722312	35522.5	11671.1	1.27331e+06	158704	8000	190937	8000	152835	8609.21	8000	8000	22924.4	8000	8000	8000	14445.9	8000	8000
KCS_115	T	M	PU	59.9	24.84	ccRCC	pT3a	G2	N0M0	22070.8	9933.68	17006.7	632240	10158.4	18400	8258.1	117860	8000	8000	8000	67553.7	8000	8000	59187.4	161120	8000	11302.2	44858	62605.6	211743	114089	8000	8000	723637	159716	8000	62919.3	8000	115876	8000	8000	8000	8000	8000	8000	8000	25425.3	8000	8000
KCS_116	T	M	PU	52.1	31.8	ccRCC	pT1b	G3	N0M0	102719	59776.7	125369	2.03113e+06	79438.9	64400	78548.4	386803	11660.7	46200	57800	304424	76806	8000	206515	643716	8000	84830.7	241731	173539	723848	492486	16226.6	8000	1.03919e+06	87762.9	8000	92118.9	8000	218103	9300	8000	8000	11812.2	8000	8000	8000	69924.9	8000	8000
KCS_117	T	M	PU	73	28.09	ccRCC	pT3a	G2	N0M0	275944	182819	359112	4.5637e+06	158711	149000	193484	610929	8000	78600	151000	442077	127500	25430.3	622714	732596	51052	281636	298997	733562	2.3149e+06	456502	106835	9479.69	1.95283e+06	125133	12218.3	193961	19597.4	259038	8000	8000	16200	24409.4	8000	30999.6	8000	82738.8	8000	25774.2
KCS_118	T	M	PU	77.7	24.68	ccRCC	pT3b	G4 (sarcomatoid)	N0M0	166534	129573	190776	2.85344e+06	57949.7	128000	176426	698581	8600	75000	110000	336330	77862.4	12000	277042	442617	10002.8	151132	194321	318116	1.0888e+06	265641	56317.9	8000	1.11111e+06	116427	8000	109560	11324.9	160712	8000	8000	8000	8000	8000	8000	8000	19727.8	8000	8121.9
KCS_119	T	M	PU	74.7	32.87	ccRCC	pT1a	G2	N0M0	250188	154903	302678	3.63935e+06	120371	120000	210567	626993	17247.7	67000	135000	457681	142985	8492.31	464808	806045	14805.6	204942	293810	389553	1.35296e+06	449134	42287.8	8000	1.10885e+06	100381	8000	188870	34648.5	398775	13500	8000	8000	15221.8	8000	32310.5	8000	102191	8000	20100
KCS_120	T	M	PU	57.1	26.7	ccRCC	pT1b	G2	N0M0	178707	89427.8	262112	3.71022e+06	152249	105000	133738	498080	19647.6	56200	115000	382510	98259.6	8500	410771	930163	16895.6	155058	318682	434410	1.60183e+06	642920	45297.4	8000	1.07203e+06	141548	8000	241964	29903.4	526902	32000	8000	12318	44138.9	8000	27223.5	11292.5	161192	8000	27228.7
KCS_121	T	F	PU	38.7	26.42	mcRCC	pT1b	G1	N0M0	213925	145124	206346	3.25725e+06	96364.9	120000	145836	548023	8000	66800	104000	374971	130152	8000	392689	667098	15584.6	186965	279633	376170	1.19545e+06	425377	49038.8	8000	1.49641e+06	106192	8000	159269	10124.5	286571	8000	8000	8000	11164.9	8000	8000	8000	69783.5	8000	8000
KCS_122	T	M	PU	76.2	20.02	papRCC	pT1b	G1-2	N0M0	137715	31289.4	131104	1.87016e+06	125204	31100	53621.5	256669	32574.9	11000	34200	129953	8000	8000	139274	214883	8000	33422.5	56660.2	186249	740003	236350	12025.8	8000	1.07297e+06	126767	8000	15503.2	8000	40566.1	8000	8000	8000	8000	8000	8000	8000	8000	8000	8000
KCS_123	T	M	PU	75.8	30.12	papRCC	pT3a	Gx	N1M0	240336	137252	412181	4.06303e+06	107550	124000	250005	633166	13200	73600	200000	397691	99278.3	30543.8	514008	548573	31033.2	255181	239412	741190	1.76507e+06	339386	75389.8	8000	1.13105e+06	151576	18846.1	259059	46138	385879	12600	8000	16229.9	23962.6	8000	18598	8000	55892.1	8000	30062.4
KCS_124	T	M	PU	69.8	30.61	ccRCC	pT1a	Gx	N0M0	168192	98344.4	321937	4.13687e+06	126455	102000	226145	769979	30290.7	59900	140000	454265	91343.8	8201.42	423275	844180	19720.9	168010	287549	489647	1.88089e+06	496583	42368.1	8000	1.65559e+06	139549	8000	165272	12203.4	262964	8000	8000	8000	19019.5	8000	8000	8000	73931.4	8000	13197.9
KCS_125	T	F	PU	66.5	20.28	papRCC	pT1b	Gx	N0M0	156726	111032	242337	2.94714e+06	122055	103000	198045	601769	18000	52800	130000	355938	93997.6	11974.9	400236	588985	16973.4	187607	250486	434188	1.30851e+06	388292	52329	8000	1.28277e+06	152883	8000	161774	32778.7	268574	8000	8000	14871.3	26350.8	8000	18374.8	8000	69151.8	8000	22879.9
KCS_126	T	F	PU	76.1	28.28	ccRCC	pT1b	G2	N0M0	137199	87660.9	218519	2.97961e+06	77865.1	77400	111090	395216	8000	40800	83800	299687	68205.3	8000	320986	542915	12332.1	141229	213355	370839	1.24574e+06	392699	17740.7	8000	1.39661e+06	130578	10884.2	256254	50472.6	377493	8000	8000	8096.64	34463.9	8000	15396	8000	78044.6	8000	13000.1
KCS_127	T	M	PU	66	29.07	papRCC	pT2a	G2	N0M0	179788	117980	297686	3.54634e+06	126405	104000	220303	784825	38479.7	68900	133000	470821	107909	9446.87	383940	728985	8000	159722	285124	347646	1.25499e+06	448456	36765.7	8000	2.05159e+06	143628	8000	127932	9858.43	294460	8000	8000	8000	11489.2	8000	10458.8	8000	70353.9	8000	8000
KCS_128	T	M	PU	75.3	31.02	collecting duct carcinoma (CDC)	pT3a	G4	N0M0	154273	90044.9	370054	3.95929e+06	138638	99300	254003	719053	22099.2	58400	158000	349394	64788.1	10058.1	403174	633191	22436.1	176598	220374	564273	1.64829e+06	381349	47383.3	8000	1.56714e+06	143023	8000	139341	12279.8	169435	8000	8000	8000	17626.9	8000	8000	8000	14134.5	8000	21971.3
KCS_129	T	F	PU	63.3	26.3	ccRCC	pT1a	G2	N0M0	210856	133226	363931	3.62787e+06	107941	113000	211044	504705	10436.1	54700	127000	312020	94372	10477.8	444556	704415	15375	178390	261763	453746	1.17447e+06	407853	26801	8000	1.41739e+06	104069	8000	86409.6	12742.5	196782	8000	8000	8000	10959.4	8000	8000	8000	44388.8	8000	8000
KCS_130	T	M	PU	83.6	27.45	papRCC	pT1a	G2	N0M0	122169	71635.6	200727	1.87606e+06	62728.1	49500	92850	245858	8000	20100	64400	163457	39817.5	8000	231978	334500	8000	107355	152273	317969	909732	245483	14542.2	8000	1.78826e+06	164903	8000	69678.7	8000	193163	8000	8000	8000	8000	8000	8000	8000	20788.3	8000	8000
KCS_131	T	F	PU	75.7	24.84	ccRCC	pT1a	G1-2	N0M0	259774	169944	459346	5.28725e+06	165528	187000	350499	1.00024e+06	37100	106000	243000	603909	166418	47504.4	699250	1.13676e+06	64445.8	334891	469755	867798	2.4385e+06	694194	91499.8	16491.2	1.78353e+06	113032	8000	156393	16050.9	262156	13000	8000	8000	17992.1	8000	9500	8000	65673.1	8000	14834.8
KCS_132	T	M	PU	70.1	23.66	ccRCC	pT1a	G2-3	N0M0	489125	371101	612849	7.34589e+06	242704	276779	369585	980262	33320	140000	251000	620414	189064	82279.1	789759	963509	80602	426220	415338	1.06402e+06	2.90032e+06	598303	189867	28819.4	1.55373e+06	71125.9	8000	103412	26678.4	255170	8000	8000	11700	8000	8000	8000	8000	26400	8000	31503.7
KCS_133	T	M	PU	66.9	26.73	ccRCC	pT1a	G2	N0M0	152785	111966	378471	4.73224e+06	143852	147000	292781	859342	22000	87400	220000	509183	87808.6	16260.8	474257	826558	29463.1	196792	244224	682469	2.05631e+06	511786	62875.8	8000	996417	149759	53658.1	518121	79904.7	905655	48700	8000	41026.5	100433	8000	58123.2	37255.8	212094	10000	47655.9
KCS_134	T	M	P	49.1	27.78	ccRCC	pT1a	G1	NxMx	222562	105528	370052	4.42492e+06	151925	121000	223377	712643	23400	55200	145000	507355	108232	13936.1	584647	1.18188e+06	29868.7	206011	343011	639616	2.1603e+06	1.01775e+06	35497.9	11949.8	787452	148056	16732.1	273375	76889	555364	40600	8000	19684.3	65193.7	8000	58045.1	16130.2	170432	8000	45295.7
KCS_135	T	M	P	47.8	26	mcRCC	pT1b	Gx	NxMx	258369	147539	350052	4.72503e+06	136314	135000	214304	664754	9000	79000	141000	521753	132730	17215.7	584853	1.01517e+06	39793.7	278075	382727	728317	2.212e+06	781139	63847.8	8433.31	823958	145075	23874.8	427784	85456.7	848201	48000	8000	45938.4	89783.7	8000	62829.4	28258.7	233719	8000	59461.2
KCS_136	T	M	P	57.2	27.47	papRCC	pT1a	G2	NxMx	345447	265142	352024	4.89586e+06	194191	248000	145439	1.08208e+06	73978.9	144000	184000	753103	253436	48000	668715	1.30063e+06	64420.6	366917	557848	612045	1.93743e+06	825986	137837	51156.1	943658	160617	33395	421875	57826.6	529809	49366.7	8841.09	24612.3	108886	8000	21958.5	51725.7	88559.6	8000	28949.5
KCS_137	T	M	P	55.1	29.03	ccRCC	pT3a	G4	NxMx	143439	91132.9	117297	2.66918e+06	73228.9	84800	68500	465792	8000	50300	43000	290017	70207.5	8000	191925	595877	8000	94979.7	234092	236361	789513	420118	19318.1	8000	920191	167351	8000	172868	18633.1	326792	8000	8000	12540.9	24484	8000	8000	8000	71299	8000	44333.3
KCS_138	T	M	P	59.9	26.04	ccRCC	pT4	G3	NxMx	127095	97829.4	250507	5.56493e+06	187743	140000	197200	1.05662e+06	27100	78900	141000	530048	62095.7	11411.7	315470	678899	27363.8	116099	187703	575120	1.95327e+06	360553	40829.8	8000	1.13916e+06	197046	8000	137314	13846.7	268714	8000	8000	8000	8000	8000	8000	8000	20791	8000	73170.8
KCS_139	T	M	P	60.7	29.26	ccRCC	pT1a	G2	NxMx	173031	98180.8	224214	3.4153e+06	107188	111000	155289	522701	8000	47000	105000	354495	82806.5	8000	326031	710588	8726.87	129274	246604	305801	1.0867e+06	462430	23707.1	8000	883578	95257.1	8000	165632	37246	370476	11800	8000	8000	21552.6	8000	12953.1	8000	89193.6	8000	13621.2
KCS_140	T	M	P	52.5	22.7	ccRCC, mcRCC	pT1a	G1	NxMx	170319	92729.7	215229	2.7889e+06	63723.8	80300	105000	348309	8000	40700	83800	271033	75058.1	8000	296652	543159	8000	129581	194991	331751	889388	352046	8000	8000	866426	91970.1	8004.07	255011	68003.5	539271	18800	8000	8354.83	40380.1	8000	36083	8000	184033	8000	8000
KCS_141	T	M	P	60.2	32.95	mcRCC	pT1a	Gx	NxMx	225349	141796	386358	5.16579e+06	160234	156000	239651	854605	22100	83700	182000	517236	143937	15890.1	536780	1.03789e+06	35007.4	238928	410272	636912	1.99819e+06	697692	46966.4	8019.28	948094	129487	9934.33	256924	45603.7	601513	26400	8000	8966.08	26311.7	8000	14345.8	8000	108683	8000	17931.4
KCS_142	T	M	P	59.8	30.93	chRCC	pT3a	Gx	NxMx	241410	147822	390639	5.31793e+06	258338	167000	301372	1.14976e+06	122619	108000	208000	582753	157016	21424.8	570033	1.36548e+06	54014.5	270375	551265	664646	2.45337e+06	1.01505e+06	89600.7	19119	895925	119103	11010.4	289106	39374.3	479782	40100	10000	8000	49050.7	8000	25383.1	10532.7	159000	8000	13267.3
KCS_143	T	M	P	53.7	31.46	ccRCC	pT1b	Gx	NxMx	302908	119108	353928	4.00977e+06	189642	100000	190872	676058	59189.2	55300	144000	451595	123777	17900	528424	949335	19532.2	202809	354003	555182	1.79892e+06	767442	58403	9561.97	627754	71131.9	9725.66	233223	32161.6	430653	25600	8000	8000	39485.3	8000	19500	8000	132703	8000	15557.4
	number of INT <8000 in N group									0	0	0	0	0	1	4	0	16	0	0	0	0	31	0	0	20	0	0	0	0	0	10	51	0	0	71	0	2	0	14	176	41	1	171	20	43	0	185	21
	number of INT <8000 in T group									0	0	0	0	0	1	1	0	22	2	1	0	2	33	0	0	18	0	0	0	0	0	8	93	0	0	87	0	32	0	71	134	74	35	130	63	99	11	136	35
	% of INT <8000 in N group									0	0	0	0	0	0.483092	1.93237	0	7.72947	0	0	0	0	14.9758	0	0	9.66184	0	0	0	0	0	4.83092	24.6377	0	0	34.2995	0	0.966184	0	6.76329	85.0242	19.8068	0.483092	82.6087	9.66184	20.7729	0	89.372	10.1449
	% of INT <8000 in T group									0	0	0	0	0	0.699301	0.699301	0	15.3846	1.3986	0.699301	0	1.3986	23.0769	0	0	12.5874	0	0	0	0	0	5.59441	65.035	0	0	60.8392	0	22.3776	0	49.6503	93.7063	51.7483	24.4755	90.9091	44.0559	69.2308	7.69231	95.1049	24.4755
QC monitoring	QC monitoring	AVG								267386	167578	387031	4.56e+06	169034	148167	276903	850583	38440.5	87194.4	187500	521524	151447	27911	579324	992998	31965.5	263486	379964	648662	1.86717e+06	602573	75268.1	13380.4	1.40924e+06	123358	5184.78	196138	26063.5	356250	12916.7	674.765	10926.7	31485.5	701.951	13239	6736.24	83707.1	0	21586
		S.D.								46095.6	32824.8	74122.3	820205	28094	28265.1	52842.3	138750	10466.5	13919.5	33653.9	86500.1	26127.7	12630.3	105361	155841	15191.7	45616	57555.5	130211	337854	91754.3	19019.8	6189.54	244986	22633.6	2612.74	34786.1	9527.09	66583.5	4903.43	1292.9	3107.07	10646.2	1628.76	3667.76	5109.57	19713.7	0	6036.6
QC error		RSD								17.2394	19.5877	19.1515	17.987	16.6203	19.0766	19.0834	16.3123	27.2278	15.9638	17.9487	16.586	17.252	45.2522	18.1869	15.694	47.5252	17.3125	15.1476	20.0737	18.0944	15.2271	25.2694	46.2584	17.3842	18.348	50.3925	17.7355	36.5533	18.6901	37.962	191.608	28.4356	33.813	232.033	27.7043	75.8519	23.5508	#DIV/0!	27.9654
[truncated: 12 more columns]

## Sheet: Data S1B
Data S1B. Clinical data together with raw intensities of individual lipids measured in urine samples. Explanation of abbreviations is as follows: N - controls, T - RCC patients, UNK - unknown, QC - quality control, M - males, F - females, ccRCC - clear cell renal cell carcinoma, papRCC - papillary renal cell carcinoma, chRCC - chromosome renal cell carcinoma, mcRCC -multilocular cystic renal cell…
Sample code	Inclusion criterion 3	State	gender	Measured types of samples (P = plasma, U = urine, T= tissue)	Age	BMI	Type of tumor	Tumor stage	Tumor grade	NM code	StS1	StS2	StS3	StS4	StS5	StS6	StS7	StS8	StS9	StS10	StS11	StS12	StS IS Taurocholic acid D4	StS13	IS SHexCer 18:1;O2/12:0	SHexCer 34:1 ;O2	SHexCer 34:1 ;O3	SHexCer 36:1 ;O3	SHexCer 38:1 ;O2	SHexCer 38:1 ;O3	SHexCer 40:2 ;O2	SHexCer 40:1 ;O2	SHexCer 41:2 ;O2	SHexCer 40:2 ;O3	SHexCer 41:1 ;O2	SHexCer 40:1 ;O3	SHexCer 40:0 ;O3	SHexCer 42:3 ;O2	SHexCer 42:2 ;O2	SHexCer 41:2 ;O3	SHexCer 42:1 ;O2	SHexCer 41:1 ;O3	SHexCer 41:0 ;O3	SHexCer 40:0 ;O4	SHexCer 42:3 ;O3	SHexCer 42:2 ;O3	SHexCer 42:1 ;O3	SHexCer 42:0 ;O3	SHexCer 41:0 ;O4
Inclusion criterion 1											include	include	include	include	exclude	include	include	include	exclude	include	include	include	IS	include	IS	include	include	exclude	exclude	exclude	include	include	exclude	exclude	include	include	include	exclude	include	exclude	include	include	include	include	exclude	include	include	include	include
Inclusion criterion 2											include	include	include	include	exclude	include	include	include	exclude	include	include	include	IS	include	IS	include	include	exclude	include	include	include	include	exclude	exclude	include	include	include	exclude	include	exclude	include	include	include	include	exclude	include	include	include	include
NCS_001	included	N	M	PU	50.3	UNK	-	-	-	-	261922	441799	790444	592115	8000	88106.1	150851	101359	8000	97368.1	136084	48260.6	134106	211880	523693	88210.2	65741.5	8000	11724.4	26799.4	16659.5	143731	8000	8000	67045.9	173046	87579.8	8000	47667.7	10471.6	113602	183738	52402.3	93313.1	8000	144355	328203	77375.2	98250.5
NCS_002	included	N	F	PU	61.3	UNK	-	-	-	-	253887	472484	379216	431324	46346.4	258538	82403.5	190908	8000	91248.2	176148	73344.1	133403	109519	466469	115152	82250.1	8341.87	20057.9	34084.7	39790.4	197788	11141.4	19188.1	115103	204595	129333	8000	83062.6	26117.6	146675	236873	89926.2	156817	8000	175773	380804	106865	167823
NCS_003	included	N	F	PU	48.8	UNK	-	-	-	-	106342	212982	423747	433436	103605	115757	314838	219267	8845.46	139293	320570	47575.7	143295	209535	237923	159679	103281	12210.7	36186.2	59989.3	72413.2	333137	24023.9	32405.3	199023	337040	194801	19155.9	123234	52915.5	233984	408516	128703	221554	20895.7	250972	665512	148972	217434
NCS_004	included	N	F	PU	47.6	UNK	-	-	-	-	72571.3	203046	291639	223075	8000	825728	46350.4	86300.8	8000	59792.4	82594.8	54736.1	95238.9	57208.3	103249	16664.4	11928.9	8000	8000	8201.74	8000	71781.3	8000	8000	39353.2	97547.1	53731.9	8000	16665.7	8000	60343.8	121152	39580.2	65700.2	8000	63899.4	201093	42610.2	88297.5
NCS_005	included	N	F	PU	56.9	UNK	-	-	-	-	25815.4	93192.2	396058	310184	8000	81791.9	8063.86	43791.1	8000	47764.1	15867.2	36947.8	11537.4	8000	20712.6	27214.9	8000	8000	9344.27	10752.1	16807	112525	8000	8000	65882.6	126289	66107.3	8000	53836.5	8000	133365	159053	52954.9	60942.4	8000	95608.9	297997	98948.3	83601.4
NCS_006	included	N	F	PU	59.9	25.39	-	-	-	-	158220	404974	659844	1.18523e+06	345109	164794	1.19242e+06	358261	8000	95679.3	596878	14830.3	538876	148443	416425	18647.8	10884.7	8000	8000	8000	8000	23492.2	8000	8000	8000	24771	11744.2	8000	8000	8000	22065.3	36339.4	8000	18745.9	8000	16472.2	70501.7	11371.3	20704.5
NCS_007	included	N	F	PU	42.5	UNK	-	-	-	-	27075.3	83789.3	200804	110751	8000	97261.8	32067.3	150436	8000	199201	70336	203833	31390.7	59388.2	121192	25299.6	15684.7	8000	8000	8000	8000	63089.6	8000	8000	25048.8	70701.5	34596.9	8000	12367.7	8000	43519.9	77093.4	16779.1	37940.8	8000	48488.2	127010	24598.8	41822.1
NCS_008	included	N	F	PU	53.4	UNK	-	-	-	-	155054	357289	230937	335739	8000	68675.8	111936	38412.5	11365.4	20555.5	27116.3	28127.9	45672.5	32817	173345	102825	74797.2	8000	21877.3	30917.4	34078.8	192767	8000	11358	106594	193978	142272	8000	76072.8	21001.1	156284	253583	102955	127849	8000	183194	450223	132826	152750
NCS_009	included	N	F	PU	58	UNK	-	-	-	-	192537	449177	1.10097e+06	1.24551e+06	8000	75973.3	359681	8000	41444.1	35446.5	33453.2	9967.7	41389.2	90157.7	69551.6	91302	52259.3	8000	27079.1	24247.3	36024.8	182474	8000	8000	102511	160088	90523.8	8000	64904.6	15642.9	145953	196584	60885.2	88587.5	8000	148845	329506	83432.8	99855.1
NCS_010	excluded	N	F	PU	68.3	UNK	-	-	-	-	18854.1	41723	110406	72434.7	8000	239053	45585.7	11936.9	8000	23621	8000	12614.4	8000	29330.2	24062	15198.9	8000	8000	8000	8000	8000	10341.5	8000	8000	8000	8314.13	8000	8000	8000	8000	15679.6	15304.5	8000	8000	8000	8000	35204.5	8000	8000
NCS_011	included	N	M	PU	53.6	27.5	-	-	-	-	155178	199354	1.0219e+06	250192	8000	57765.4	54716.6	83401.7	8000	30128.7	65505.5	8000	11427.4	46250.9	43182.7	63166.8	50086	8000	11741.4	30704.1	21063.2	149835	8000	16310.1	87856.7	213622	87568.1	8000	53836.9	22845.5	131649	239497	62672.9	98547.2	8000	155234	413085	81330.2	109985
NCS_012	included	N	F	PU	39.4	28	-	-	-	-	692989	1.00278e+06	1.0481e+06	709142	9773.92	145915	482949	93204.7	8000	272866	100188	126312	102382	214965	218634	174005	103787	15257.6	48215.4	63568.6	77609.2	369437	31681.9	36817.1	225597	353958	184553	24686.4	162761	56861	304560	452324	136502	182858	20978.2	344117	814691	190612	216194
NCS_013	included	N	M	PU	33.4	29.63	-	-	-	-	377343	556579	1.0915e+06	1.01577e+06	8000	33548.7	97484.7	176666	8000	91888.8	155342	88914.7	65868.1	99074	144444	122404	79673.3	8000	44151.5	56152.8	50863.4	283112	16868.1	26230.7	166204	323853	176239	10326	119859	38358.5	283137	387054	141840	222600	10187.4	265612	742076	178528	282296
NCS_014	included	N	M	PU	54.6	26.79	-	-	-	-	123807	551095	1.33881e+06	968465	8000	26634.9	171793	155979	8000	113041	107712	143881	67714	96467.6	85652.9	91217	62177	8000	31966.9	39621.1	32123.6	231417	8000	10560	124599	247472	152397	8000	100416	11937.3	264709	256969	93131.6	195290	8000	175344	511437	155407	185201
NCS_015	included	N	F	PU	54.8	26.5	-	-	-	-	301297	525735	702068	502659	8000	217657	77352.9	211817	8000	177833	240832	67680	247961	191302	379915	188853	112683	12786	40372.7	56504.4	52046	299357	13859	26609.1	167987	320739	219349	8000	82694.7	39206.3	204187	339050	139621	197697	8000	194367	525506	151674	206979
NCS_016	included	N	M	PU	48.9	30.42	-	-	-	-	25532	23712.7	20403.1	19061.6	8000	32100.7	30386.2	255413	8000	130960	79975.5	86688.6	36644.9	80119.7	57786.1	37951.6	27186.5	8000	8766.27	17372.5	15470.1	149611	8000	8000	77544.5	175048	100660	8000	46677	11381	134336	211369	57315.4	104503	8000	115831	402135	106864	111846
NCS_017	included	N	F	PU	47.1	38	-	-	-	-	315486	403917	517416	718851	8000	281821	165986	78956.1	8000	174376	54304	128535	90926.5	186394	210735	108742	54682.2	8000	28350.2	34446.3	51923.7	188334	8647.47	16926.3	101565	188317	119866	18851.3	126645	18204.2	212824	202190	76627.8	113691	8000	165955	398586	116616	129385
NCS_018	included	N	M	PU	60.6	29.06	-	-	-	-	269865	391713	694515	616922	8000	128850	195982	214756	8000	78869.5	140557	49967.6	53333.8	82578.2	144162	86943.9	38749.5	8000	14498.2	12358.4	16499.5	153943	8000	8000	95425	132014	84357.2	8000	60452.3	8586.55	162990	174756	63818.3	74857.7	8000	97884.4	330274	88566.5	91884.8
NCS_019	included	N	F	PU	52.7	28	-	-	-	-	211490	458006	2.12774e+06	564995	31740	70446.7	448066	508740	16769.7	309126	320714	370919	51291.8	182108	40095.5	120360	76911.4	11368.5	72041.8	75877.9	71585.3	394668	27376	37734.8	233282	431277	162644	8000	143489	52290.9	385382	493059	123353	171078	20381.5	319992	915910	188459	202088
NCS_020	included	N	F	PU	57.3	22.1	-	-	-	-	23215	130544	285895	80150.6	8000	72493	103799	92325.2	8000	164992	135820	69864.7	80084.1	119679	134297	60182.5	30688.2	8000	8000	11291.2	13425.5	122298	8000	8000	65813.2	115229	56272.8	8000	40575.2	8000	111618	129571	29498.6	57562	8000	92403.4	245256	44151	64328.5
NCS_021	included	N	F	PU	55.3	27.4	-	-	-	-	74295.9	245884	486844	230539	8902.28	316971	66745.5	683656	8000	203432	134988	89518.8	55563.9	67977.4	53740.9	31381.4	23417.3	8000	8000	8000	10706.8	113819	8000	8000	60151	105324	88337.1	8000	34967.8	8000	92968.3	124341	58014.1	105376	8000	84187.4	222256	78296.4	132605
NCS_022	included	N	M	PU	38.6	28.98	-	-	-	-	218043	531674	1.26006e+06	898473	8000	221331	81836.2	43160.5	8000	99557.2	90223.1	93904.5	103319	287071	224544	74024.7	43342.4	8000	15241.6	18640.5	27762	117433	8000	10631.2	56424.9	127414	68842	8000	57486.2	10658.6	97880.6	118025	31407	48020.7	8000	108637	201883	45281.9	44925.9
NCS_023	included	N	M	PU	58.5	35.19	-	-	-	-	8000	12610.5	23747.9	8000	35093.7	47475.9	279570	190712	8000	70846.1	234679	61265.5	35091.2	84999.1	72021.9	16281.9	11750.5	8000	8000	8000	8000	47403.7	8000	8000	21300.3	61681.3	52472.1	8000	11959.9	8000	42744.2	62476	28265	69811.2	8000	45054.1	130647	50553.4	71587.1
NCS_024	included	N	F	PU	34.2	24	-	-	-	-	136521	375188	760607	367225	9734.46	35540.8	387630	337618	8000	467426	396676	255598	43360.9	626520	102401	111415	83449.7	9463.9	29637.5	41043.1	24363.7	178453	8000	11796.5	98461.4	218591	125761	8000	54504.5	15149	141381	239957	76280.9	148023	8000	120529	361457	100225	142278
NCS_025	included	N	F	PU	53.7	31.64	-	-	-	-	47726.6	110570	775728	276034	8000	205887	227823	21201.4	8000	46856	51585.4	8973.96	13214.6	126310	10114.1	15464.3	12152.5	8000	8000	8000	8700.76	90928.8	8000	8000	38383.9	96302.7	67011.5	8000	30576.3	8000	44648	112603	39010.5	44622	8000	105209	153358	37331.3	56806.1
NCS_026	included	N	F	PU	54.5	38.2	-	-	-	-	44588	153207	145351	95429.1	8000	98687.8	8000	8000	8000	14124.2	8000	82643.7	22171.9	8000	32324.1	12389	8000	8000	8000	8000	8000	36621.9	8000	8000	18119.5	28153.5	10187	8000	8000	8000	33507.5	38981.4	8000	19298.3	8000	19473.1	70277.2	12822.2	16761.9
NCS_027	included	N	F	PU	37.3	26.23	-	-	-	-	496545	1.01488e+06	693015	962195	55936.5	2.65294e+06	565543	252301	8000	188249	297467	196446	213120	296446	357708	140476	113670	13026.5	19550	47951.4	25756.9	177113	8000	17828.3	96260.9	216337	123229	8000	55389.2	15812.2	131584	243946	80762.3	172634	8000	143731	392730	92378.6	192579
NCS_028	included	N	M	PU	52	UNK	-	-	-	-	318243	759124	750958	781484	8000	31872.2	84325.1	412522	8000	471671	178477	403899	81367.8	155400	116337	57285.7	33283.7	8000	9695.83	11734.5	9570.35	115904	8000	8000	61849.7	132913	88539.8	8000	32179.3	8000	120910	149987	53500.1	87237.2	8000	76125.1	242135	78382	94381.9
NCS_029	included	N	F	PU	59.1	UNK	-	-	-	-	126020	264131	720653	421495	57275.3	166548	307244	327868	8000	189348	220272	72493.1	171386	181410	575181	110376	65036.8	8000	50588.6	36145.8	17424.7	245124	8000	8000	110222	204176	151770	8000	56606.6	8000	184210	218387	89759.6	152160	8000	122167	357851	117865	152161
NCS_030	included	N	F	PU	56.2	29.41	-	-	-	-	75335.7	200234	610155	525216	8000	79199.6	177097	8000	8000	8000	8000	8000	15532.4	62401.2	21952.6	32155.3	10542	8000	8000	8000	8000	36920.6	8000	8000	16076.4	29154.3	11811.7	8000	21639.2	8000	27915.4	36448	8000	9658.6	8000	23658.9	63972.8	8069.26	11255.8
NCS_031	included	N	M	PU	58.7	25.9	-	-	-	-	85091.5	772631	1.64541e+06	1.13293e+06	74115.3	11132	243394	330879	8000	142423	300279	114544	64828.4	163431	34468	44507.6	29108.8	8000	8422.16	24195.5	9597.47	170027	8000	8000	121976	236659	128329	8000	38416.8	12000.7	199934	316330	106757	144133	8000	114574	629229	151538	197317
NCS_032	included	N	M	PU	46.6	32.6	-	-	-	-	485382	723229	1.07266e+06	730351	8000	28120.3	75381.8	224980	8000	176954	73221.1	208067	50171.7	62761	71179	128650	108808	18421	59458.9	63346.2	32258.5	288034	8000	15559.8	146123	316934	144680	8000	70047.2	18726.4	230159	308097	90174.1	160109	8000	173202	558036	123001	169985
NCS_033	included	N	M	PU	43.5	23	-	-	-	-	83181.6	297017	651172	392058	8000	54302.2	37453.8	33785	8000	41720.8	41506.9	21376.7	78155.5	39852.6	164394	131346	84341.5	11976.8	41460.9	49586.5	50158.8	316476	13576.4	25675.5	180273	363157	176627	8803.46	101975	41706.8	256531	431751	123323	166477	9051.4	199340	693377	171075	219071
NCS_034	included	N	F	PU	45.5	23.3	-	-	-	-	195380	609676	1.32087e+06	314558	8000	241081	119658	208447	8000	486634	123628	254366	86031.8	205093	142363	107461	93413.6	8993.74	19766.4	31464.6	30780.5	211028	8000	14415.8	107006	219558	160086	8000	73497.6	20333.3	144460	244906	99350.1	204747	8000	151446	394869	131246	205503
NCS_035	included	N	F	PU	38.4	29	-	-	-	-	34911.2	140452	204384	87114.3	8000	14951.5	8000	387363	8000	303144	68869	266187	23267.1	62416.3	35874	27485	19131.1	8000	8000	8000	8000	44981.4	8000	8000	21423.2	55759.8	26353.9	8000	8000	8000	29513.4	67950.6	14640.9	23903.5	8000	43535.2	99037	16092.1	32306.6
NCS_036	included	N	F	PU	29.5	22	-	-	-	-	32420.8	119001	189928	81022	8000	13846.9	8000	426153	8000	314483	70643.3	250176	22002.2	62991.5	38604.6	33462	28829.6	8000	8000	8000	8000	64016.4	8000	8000	31245.8	73210.9	34819.5	8000	8141.94	8000	40992.6	91832.8	26520.5	33040.6	8000	52879	138158	26459.7	45917
NCS_037	included	N	M	PU	43.6	29.8	-	-	-	-	218062	386917	1.23321e+06	813637	53689.7	29793.8	1.07162e+06	70660	10439.9	111878	258446	60003.1	15737.1	552921	21069.2	114860	78898.8	11162.4	37925.5	45897.7	40102.3	221407	9941.97	20312.5	119457	230933	123821	8000	81769.3	25869.3	164897	249132	82388.9	134433	8000	165737	391967	94061.5	147939
NCS_038	included	N	M	PU	54.9	24.49	-	-	-	-	111063	505667	1.99665e+06	1.03733e+06	8000	58063.7	182498	1.24689e+06	8000	1.16515e+06	617794	526114	53950.1	781606	102282	158803	81461.8	9299.42	37171.5	32742.8	40429.7	245640	8000	10678	123464	219549	149678	12622.4	111696	16471.1	250040	256506	88382.8	148648	8000	155147	457945	123844	167272
NCS_039	included	N	M	PU	55.6	27.43	-	-	-	-	553693	339878	1.38362e+06	675018	37185	68322.1	270726	102422	8000	133159	167331	52847.8	151551	191569	232212	69829	51683.9	8000	9393.08	19574.1	9286.32	117275	8000	8000	60894	127307	71234.8	8000	34070.1	8000	76179.1	141743	47220.3	96158.1	8000	94943.8	231961	44763.2	102415
NCS_040	included	N	F	PU	46	24.45	-	-	-	-	64004.4	280745	1.17944e+06	149752	8000	418410	175844	292953	8000	416390	222140	482356	21052.1	221727	45572.9	53464.5	40893.1	8000	8000	12159.6	8000	61174	8000	8000	28946.9	78842.9	42351.6	8000	14147.9	8000	39891	79153.4	20993.7	50334.5	8000	48431.3	129175	33150.3	55438.3
NCS_041	included	N	F	PU	45.1	24.5	-	-	-	-	333965	580628	661872	702807	8000	3.03111e+06	234246	278735	8000	287324	251937	215504	624324	227523	674076	37354.1	32760.4	8000	8000	8000	8000	56453.8	8000	8000	26750.9	79678.7	36159	8000	18583.4	8000	58179.9	88624	16624.6	79141.5	8000	44060.3	160378	31713.3	80266
NCS_042	included	N	M	PU	43.9	25.66	-	-	-	-	1.20187e+06	981978	2.5156e+06	1.86582e+06	8000	14313.6	81553.7	79123.3	8000	116157	70732.6	97904.2	33394.5	70896.7	32251.6	98090.8	61140.6	8000	30293.5	47544.9	32837.4	248762	8000	15592.9	131154	235952	147564	8000	72673.1	28007.3	188327	268746	106407	170995	8262.17	199291	441441	132606	189885
NCS_043	included	N	M	PU	59.1	21.7	-	-	-	-	231952	493362	940924	645472	34911.9	133879	134352	1.01319e+06	8000	212682	932402	120482	79290.4	256024	159932	171973	103287	8523.33	49825.8	54567.9	48572.2	316987	12381.1	22790.1	159930	294163	260732	8000	105536	30068.4	252497	301374	167760	236616	8000	192896	548785	216987	259230
NCS_044	included	N	M	PU	43.6	27.2	-	-	-	-	226066	360873	805716	832115	8000	98508.6	192429	49811	8000	49878.5	119381	31464.9	38022	82205	76879.1	183976	112612	16187.4	49107.9	60492.3	63587.3	328155	15550.3	33697.4	150471	310115	193349	9350.71	116153	40689.9	218767	326591	117024	191446	17413.6	297864	577634	128274	170204
NCS_045	included	N	F	PU	54.2	33.1	-	-	-	-	178969	630131	2.77841e+06	1.3739e+06	19323.6	921584	523525	400038	8000	491688	381789	442380	114455	397419	119269	99038.3	69262.1	8000	25273	38044.2	37911.1	207723	10257.1	21556.7	120959	248423	131508	13815.9	120770	29543.8	206786	283905	92163.2	115437	8744.89	220569	499661	111754	153152
NCS_046	excluded	N	M	PU	59.2	UNK	-	-	-	-	31734.7	60546.9	237598	125085	8000	45380.9	39992.5	8000	8000	26881.6	15899.8	9995.25	9023.94	58877.9	8000	8000	8000	8000	8000	8000	8000	48166.7	8000	8000	21547.2	57327.6	26477.8	8000	17124.3	8000	50438.2	68255.5	15139.9	18225.1	8000	36952.6	122540	29285.5	23277.4
NCS_047	included	N	M	PU	45	23.55	-	-	-	-	916862	996787	2.50591e+06	1.25652e+06	8000	100882	53376.6	27851.5	8000	47078.8	40409.5	12655.2	79019.3	60762	94608.2	90105.2	65838.3	9687.22	32477	49125.4	34860.1	221636	8448.36	17213.6	120434	279539	148351	8000	95495.7	28806.4	222375	314788	99684.3	172054	8000	206557	584940	136654	200652
NCS_048	included	N	M	PU	53.2	24.11	-	-	-	-	103921	197472	635044	197647	8000	12200	130865	92129.3	8000	239927	83602.9	135516	21587	244249	38165.9	82745	59434.9	8424.55	32373.7	48521.4	34154.5	245254	8000	16215.3	131659	267593	138401	8000	67393.2	22110.4	202818	271091	98793.1	122597	8000	159803	479657	124340	143219
NCS_049	included	N	M	PU	39.7	UNK	-	-	-	-	174384	207843	1.03166e+06	400091	8000	19953.7	46829.2	8000	8000	133775	31927.3	43583.4	13267.6	148340	38977	29212.1	13562	8000	8000	8000	8000	44828.1	8000	8000	13847.4	53140.3	29309.1	8000	8000	8000	25348.8	56780.1	12805	24165.6	8000	44116.6	89028.6	17192.4	25105.5
NCS_050	included	N	M	PU	52.4	UNK	-	-	-	-	719373	711423	1.33407e+06	1.1583e+06	67879.1	112100	544916	99080.5	8000	135894	199791	55910.2	127225	290801	236053	173996	117679	11726.9	36577.5	43487.6	50190.7	239962	11397	22641.2	127006	232653	130885	8000	97767.7	33847.1	184605	286892	91989.9	133245	13316	251132	557525	145219	154049
NCS_051	included	N	M	PU	40.2	28.4	-	-	-	-	698698	516425	791466	1.03694e+06	9798.95	68009.5	225247	147874	8000	232902	72539.2	75384.4	120091	126539	238965	121428	70138.1	8611.85	36120.9	46207.3	33545.3	247524	8000	14589	127066	230129	123362	8000	80792.7	21184.2	171785	239009	80219.5	133769	8000	206489	437160	103687	129551
NCS_052	included	N	M	PU	64.4	34.29	-	-	-	-	263341	436922	614542	1.03438e+06	8000	72428.7	135826	43424.3	8000	96581.2	61366.3	33693.3	34683.4	184190	62341.4	75337.3	52563.6	8000	8000	14443.2	8000	91444.6	8000	8000	43224.4	106748	53700.8	8000	17555.5	8000	63809	103153	28264	74100.7	8000	70593.7	192344	33582.8	75731
NCS_053	included	N	F	PU	46.2	20	-	-	-	-	37988.4	141468	279833	53587.6	8000	72646.5	13723	89535.7	8000	48303.3	38906.7	21275.7	17234.7	19569.4	63059.7	31570.4	13318.7	8000	12103.1	8000	8000	89427.5	8000	8000	50510.6	75826.6	54549.5	8000	34731.9	8000	117893	87781.5	33720	45100	8000	53416.4	185951	97578.4	54498.3
NCS_054	included	N	M	PU	54.2	26.3	-	-	-	-	44207.3	114138	314076	261080	8000	47764.8	12707.5	61653.5	8000	16113.1	50211.1	8000	18250.7	31897.4	34280.9	17721.6	13241.4	8000	8000	8000	8000	36479.7	8000	8000	10145	59916.9	23435	8000	8000	8000	9717.28	47926.1	9514.52	32495.3	8000	39747.5	74388.5	8000	30675.1
NCS_055	included	N	F	PU	51.2	23.71	-	-	-	-	121525	192875	825280	357919	38695	568548	327231	519156	40648.2	322397	448225	334248	37359	445927	73675.6	51762.8	24951.6	8000	10493	10088.7	16121.6	104115	8000	8000	42213.5	77801.8	43806.4	8634.56	57802.6	8000	83266.5	101926	25243.1	51671.6	8000	91624.2	181760	39467.5	58544.6
NCS_056	included	N	M	PU	29.8	25.45	-	-	-	-	127654	392391	457667	720642	8000	47328.2	185732	8000	8000	52701.2	13387.3	26494.2	24476.9	111208	12848.5	106925	63279.8	8000	35552.2	44757.6	32960.8	237983	9360.18	12532.8	124720	238228	129223	8000	89626.6	16931.3	181627	244044	96162.4	116108	8000	165674	423909	111447	138402
NCS_057	included	N	F	PU	53.5	30.12	-	-	-	-	44724.4	116911	95112	186402	8000	343125	52989.5	50676.5	8000	46123.2	44104	8077.68	173463	49414.8	224587	14278.1	8000	8000	8000	8000	8000	47844.1	8000	8000	19157.8	55298.6	29794.7	8000	8000	8000	37237.8	58408.1	14984.3	40368.9	8000	16180.7	96707.8	27920.6	48182
NCS_058	included	N	F	PU	40.9	23.4	-	-	-	-	308956	475619	1.35084e+06	938987	8000	818951	137834	167475	8000	88826.9	176202	62846.7	202259	168085	509114	78063.3	55286.5	8000	8375.49	16243.4	19657.1	127446	8000	9677.62	65963	135960	72084.5	8000	55978	12825.3	114255	161440	47595.3	101359	8000	136575	301273	62131	109311
NCS_059	included	N	M	PU	44.5	25.38	-	-	-	-	322852	279496	1.11681e+06	581686	8000	42904.2	145068	8000	8000	44044.6	54320.8	8000	55769.6	170243	71805.1	50949.4	41123.9	8000	14329.4	26885.5	14352	153054	8000	8930.61	70756.6	172154	92894.9	8000	39228.3	8028.54	97999.4	164090	54803	118688	8000	138639	304300	65670.5	118541
NCS_060	included	N	M	PU	36.3	24.82	-	-	-	-	415464	559207	1.29468e+06	395886	279208	356666	1.41017e+06	195058	53220.3	294405	248080	278651	280146	334433	307445	134933	112006	13245.5	33507.3	56093.1	42621.9	266533	14768.4	33661.1	148873	334625	151089	8000	86974.6	54731.2	191864	424122	112096	169623	22055	319380	683305	134393	218115
NCS_061	included	N	M	PU	63.5	15.96	-	-	-	-	327887	512151	1.00266e+06	1.58338e+06	55498.1	83981.9	488895	255213	8000	94991.7	194470	62665	76922.6	140470	265231	145660	98112.3	11038.2	32672.2	41894.3	50928.4	199698	13324.7	25980.5	108691	216855	136538	8000	82799.4	28456	149553	224664	89032.9	181727	10782.1	180706	384986	111980	178152
NCS_208	excluded	N	F	U	64.8	30.48	-	-	-	-	28220.4	60149.5	427947	108634	8000	75787.6	291975	51318.5	20791.6	179600	75417	153059	74897.2	244884	87447.8	8000	8000	8000	8000	8000	8000	8000	8000	8000	8000	8000	8000	8000	8000	8000	10681.5	8000	8000	8000	8000	8000	24251.1	8000	8000
NCS_209	included	N	F	U	42.2	17.3	-	-	-	-	113388	356366	583957	214646	8000	99764	92165.7	142889	8000	321942	125370	342073	36299.2	327020	60745.7	86729.9	31790.1	8000	14673.6	12479.4	10703.8	115645	8000	8000	55207.5	88201.1	78754.6	8000	27903.3	8000	57334	78230.2	39170.9	58803.1	8000	60879.1	124730	47649.2	51226.1
NCS_210	included	N	M	U	36.6	22.4	-	-	-	-	302654	481320	863086	404652	8000	144006	171765	285050	8000	259167	175880	183046	17600.2	340624	37467.2	203307	153561	23047.6	40360.5	64085	46251.4	271595	12874.5	27543.7	151472	301418	109808	8000	77590.9	38088.8	184216	343478	72016.7	98312.1	9531.77	217072	530756	87805.3	108756
NCS_211	included	N	F	U	35.7	19.03	-	-	-	-	1.00785e+06	1.71255e+06	1.89475e+06	908045	24058.2	150150	224324	1.15351e+06	8000	1.08363e+06	301853	903803	126540	323709	190037	135457	107386	9385.34	32640	44952.9	29623.1	288972	8000	10677.1	151007	289969	179273	8000	85349.3	18240.2	218271	343692	108785	230536	8000	190353	585049	164228	219615
NCS_212	included	N	M	U	36.3	29.57	-	-	-	-	111295	149458	325710	114765	30967.8	60626.6	250161	219725	8000	132755	175851	45625.5	51690.6	138598	115775	89125.2	56651.8	8000	11769.3	26386.6	8000	132829	8000	8000	72945.6	157763	73578.1	8000	19818.8	8000	93202.3	181403	41393.1	70800.3	8000	79086.3	273028	53822	83974.5
NCS_213	included	N	F	U	37.4	24.21	-	-	-	-	78723.1	299993	717029	187125	38295.1	570324	252346	203363	8000	130927	358209	128713	149328	236234	347896	201501	140890	12971.2	40811.3	51650.3	35244.5	295659	9285.53	17416.1	162297	331014	208844	8000	95976.6	27701.2	223889	382592	147946	203191	10078.2	264153	649960	177243	237316
NCS_098	included	N	M	PU	47	27.7	-	-	-	-	19083.8	36448.1	176386	60607.5	8000	48963.7	80952.8	41366	8000	59800.4	42933.8	17030.4	38449.2	83059.7	67576.5	48708	30115.7	8000	8000	10346.9	8000	84831.6	8000	8000	44134.5	88689.3	47279.8	8000	9767.1	8000	61144.6	98753.3	28898.9	36908.5	8000	39344.5	161435	40316.8	45943.2
NCS_094	included	N	F	PU	43	23.5	-	-	-	-	22211.1	420151	1.57316e+06	536686	8000	213306	193555	174839	8954.73	194635	159677	164295	190786	231166	238584	106887	79123.9	9856.31	10820.7	15394	8369.99	51632.5	8000	8000	8734.33	58839.7	58590	8000	11263.6	8000	13758.7	47158.8	23900.3	80525.7	8000	47352.1	70425.3	22790.5	65797.1
NCS_214	included	N	M	U	36.9	23.36	-	-	-	-	447925	503580	1.52223e+06	344805	12628.3	46809.2	215951	99352.2	8000	28560.7	62273.2	23468.7	47214	65591.9	54596.9	83529.3	71011.4	8000	8000	23159.6	18147.6	114102	8000	13847.4	54377.8	145175	74665.5	8000	22869.7	21906.3	44193.3	146903	43472.7	77130.3	9407.15	138226	194683	40222.6	71701.2
QC_01		QC	QC	QC	QC	QC	QC	QC	QC	QC	203853	387358	1.48812e+06	909847	8000	70052.3	215391	146975	8000	186124	135577	182743	48738.6	159831	59845	92299.3	52694.2	8000	27889.5	36829.9	32301.7	217337	8000	8000	122199	217591	130880	8000	110283	17100.6	243908	264618	85544.8	128863	8000	162011	506040	139143	151177
QC_02		QC	QC	QC	QC	QC	QC	QC	QC	QC	214064	384586	1.58689e+06	925738	8000	68542.5	213722	155854	8000	190371	137263	185456	51072.5	163612	71451.7	115176	63841.2	8000	39775.4	41857.2	49083.8	283061	13552.8	17767.3	167827	281103	155001	14645	144699	26151.6	315838	341418	112891	152291	8000	223901	642030	180976	186836
QC_03		QC	QC	QC	QC	QC	QC	QC	QC	QC	168774	328849	1.30499e+06	781570	8000	55051.2	175293	107601	8000	136189	102263	145784	42173	122907	50516.4	70332.4	38061.6	8000	19581.2	17883.8	15177.9	167592	8000	8000	99712.2	172708	94362.6	8000	69750.4	8000	193757	211629	66778	93672.5	8000	109795	397783	113706	109276
QC_04		QC	QC	QC	QC	QC	QC	QC	QC	QC	194584	389672	1.61404e+06	893803	8000	50115.1	209000	119430	8000	161705	120032	172032	44996.5	149020	59447.4	67347.1	33017.4	8000	11507.2	11030.8	15232.8	145854	8000	8000	84775.4	145776	82708.3	8000	73148.9	9581.88	164846	173063	57639	75544.1	8000	117644	361224	97338.5	100087
QC_05		QC	QC	QC	QC	QC	QC	QC	QC	QC	181935	357314	1.46821e+06	808396	8000	61906.2	193229	117179	8000	158547	108572	158729	38259.7	146908	61669.7	85918.1	47920.6	8000	16534.7	21416.5	23150.1	175126	8000	8000	106939	174943	98239.1	8000	88025.5	10639.9	193437	205057	69272.6	92953.5	8000	131949	401355	111236	112204
QC_06		QC	QC	QC	QC	QC	QC	QC	QC	QC	181197	323591	1.25686e+06	723945	8000	68576.3	184139	119767	8000	153144	105743	128256	34888.1	145206	38529.1	79713.6	45633.7	8000	15219.7	26650.2	21652.6	190529	8000	8000	106251	195785	99664.5	8000	79690.2	8351.55	205940	221569	78348.9	104219	8000	119645	446219	118869	130710
QC_07		QC	QC	QC	QC	QC	QC	QC	QC	QC	232113	379934	1.44618e+06	838482	8000	104663	222288	170391	8000	190955	136778	157800	44642.2	160738	59501	107994	60783.3	8000	33119	47110.2	45446.1	283294	10724.2	9739.18	163153	282897	163190	8000	127161	20258.4	305972	337804	111160	168432	8000	196963	632401	182851	194460
QC_08		QC	QC	QC	QC	QC	QC	QC	QC	QC	220473	341385	1.57277e+06	785378	8000	89841.8	190667	174295	8000	229435	137405	229231	56348.2	143473	80721.4	115119	62955.3	8000	29672.3	35515.5	38572	236711	8228.14	8000	139276	234044	131756	8324.44	112799	18907.6	255173	273020	92795.2	139048	8000	175356	521925	137587	150466
QC_09		QC	QC	QC	QC	QC	QC	QC	QC	QC	188750	343377	1.43124e+06	750335	8000	97366.9	182576	175604	8000	199939	131325	170422	46917.1	149906	70732.8	108398	60435.9	8000	32025.9	34605.6	39852	250488	8000	14054.2	145545	247017	136578	12760.1	127069	19935.1	272486	299625	97382.9	130991	8446.3	195413	552313	153419	162521
QC_10		QC	QC	QC	QC	QC	QC	QC	QC	QC	172261	319516	1.34119e+06	730448	8000	119616	161785	140975	8000	159736	112369	167874	50066.8	127637	84802.4	116771	70190.1	8000	34085.3	38528.1	35091.6	228270	9518.87	10149.6	131556	232014	135316	8000	108355	15507.5	250571	272947	98024.2	135932	8000	178379	529738	144236	155695
QC_11		QC	QC	QC	QC	QC	QC	QC	QC	QC	193626	349386	1.42814e+06	729192	8000	97272.6	188057	142832	8000	179012	117511	173022	47292.1	139004	79316.4	98054.4	51613.9	8000	17907.5	21580.5	29285.4	171757	8000	8000	104135	180356	95029.4	8000	78588.7	13230	182545	203583	69450.2	98301.2	8000	133890	399850	107047	113034
QC_12		QC	QC	QC	QC	QC	QC	QC	QC	QC	154965	307718	1.11312e+06	654041	8000	91642	152551	127790	8000	145875	103713	140499	40642.4	110619	53797.2	106463	64101.3	8000	26838	34132	29563.8	222840	8000	9659.4	135951	239771	135307	8030.6	109156	12943.9	263444	274210	94946.5	134259	8000	166871	534958	146014	158331
QC_13		QC	QC	QC	QC	QC	QC	QC	QC	QC	190688	312064	1.24348e+06	679476	8000	108382	168699	132358	8000	152079	103582	130691	37082.9	132167	44704.4	100742	58485.5	8000	27001	29092.3	30730.8	206272	8000	8000	113407	187014	104575	8000	100252	13988.6	210607	228376	74485.8	109596	8000	151428	432434	128036	125824
QC_14		QC	QC	QC	QC	QC	QC	QC	QC	QC	189342	334796	1.38288e+06	710641	8000	63385.8	173873	148699	8000	190566	113806	184347	49569.4	133698	63116.5	90269.4	53546	8000	25258	31278.8	34288.8	216882	8000	10029.7	134733	219231	127052	8434.43	112566	12177.4	244294	252013	94034.9	126886	8000	168528	493946	140887	142025
QC_15		QC	QC	QC	QC	QC	QC	QC	QC	QC	198561	331689	1.47014e+06	743726	8000	89005.8	175734	167308	8000	194194	124140	182180	48269	145028	64847.5	91496	46645.3	8000	27921.2	29503.2	37134.1	231830	8961.8	10748.1	135080	225641	119018	11471.3	118017	17487.1	246865	263284	83637.8	121109	8000	182794	502109	139159	142589
QC_16		QC	QC	QC	QC	QC	QC	QC	QC	QC	176809	323540	1.33137e+06	697620	8000	102835	169181	131476	8000	164136	106453	152501	44559.6	124445	61801.4	84008.9	46410.6	8000	19273.5	23921.4	24157.8	176062	8000	8000	107367	176323	96157.8	8000	89633.6	9600.55	195178	209183	69262.9	91644.9	8000	142178	408744	108216	114512
QC_17		QC	QC	QC	QC	QC	QC	QC	QC	QC	175045	331587	1.31779e+06	715617	8000	93156.4	181437	118642	8000	147571	112103	144100	38043.2	132422	54662.2	80014.7	36145.5	8000	18419.2	21294.6	27943.1	178869	8000	8000	105912	180970	96390.3	8000	92821.6	10616.9	207382	217573	65942.4	89800.6	8000	140961	436059	112823	115712
QC_18		QC	QC	QC	QC	QC	QC	QC	QC	QC	174985	320420	1.20449e+06	654730	8000	84257.3	179836	127295	8000	157838	109540	125688	30566	134664	40345.8	57278.8	32427.6	8000	16117.2	17247	24203.3	166855	8000	8000	100231	173885	87312.9	8000	81185.5	8672.52	188051	198445	66646	84649	8000	132066	409087	108092	117770
KCS_021	included	T	M	PUT	51.2	UNK	ccRCC	pT1a	G2	N0M0	33235.4	133524	749350	366275	8000	40095.9	148109	174171	8000	201577	77538.1	87255.3	37911.9	65312.2	47955	47823.1	29495.2	8000	8582.22	17986.5	13669.8	134936	8000	8000	82940.6	162774	106577	8000	59660.4	8000	184808	206352	76079.9	126721	8000	89601.1	425445	126955	163660
KCS_022	included	T	M	PUT	81.2	23.88	ccRCC	pT1a	G1	N0M0	88267.6	298261	1.14424e+06	273023	8000	105069	100482	82804.2	8000	72809	93751.9	8581.33	32713.8	190502	60083.2	50850.2	18237.5	8000	8818.6	9332.99	12293.5	112586	8000	8000	70851.7	103143	52590.1	8000	51243.4	8000	133408	125503	40694.9	44446	8000	84454.5	258419	77089	59214.7
KCS_023	included	T	F	PUT	81	28.04	ccRCC	pT2b	G2-3	N0M1	91949.7	335917	1.12645e+06	717448	60369	152900	239512	654804	12610.7	298011	470124	144383	46226.7	205682	52204.9	32367.6	16607.7	8000	8000	8000	8000	77978.1	8000	8000	42848.4	75331.5	35373.5	8000	34240.5	8000	85783.5	95467	20390.7	43185	8000	50808.2	190568	38147.4	54716.9
KCS_024	included	T	M	PUT	54.9	27.08	ccRCC	pT2a	G2	N0M0	509332	1.41308e+06	1.18858e+06	1.91261e+06	28504.7	54864.6	116898	339711	8000	168211	402884	104272	96494.6	246408	174147	156438	105238	16746	52543.5	71793.5	58571.3	392518	15344.1	28631.6	209691	388500	247294	11073.8	122599	33880	356351	452266	167976	169664	13209.6	271599	865248	273712	206649
KCS_025	excluded	T	M	PUT	61.5	24.69	ccRCC	pT1b	G2	N0M0	216492	355330	2.00778e+06	894698	8000	92172.3	37233.8	112334	8000	79653.3	93520	26243.6	8000	106013	9707.26	47347.6	28469	8000	8000	17293.2	14279.3	149621	8000	8000	83928.9	147253	77928.5	8000	56202.4	8000	138153	157033	52644.4	83069.9	8000	126021	330481	80368.1	96384.2
KCS_026	included	T	M	PUT	64.7	21.33	ccRCC	pT1a	G2	N0M0	159343	282532	572690	654944	8000	100563	125854	8000	8495.15	18171.2	15664.2	40329.8	105655	60849.5	93140.1	38695.6	33002.6	8000	8000	8000	8000	40459.3	8000	8000	17260.4	59495.6	27358.7	8000	13891	8000	45590.5	70815.5	13041.4	26122.9	8000	28318.8	123831	39046.9	41290.5
KCS_027	included	T	F	PU	62.9	26.67	ccRCC	pT1b	G2	N0M0	33783.7	139234	692478	394755	28791.9	1.03861e+06	650523	344980	235047	430228	416211	469637	59737.7	368608	67994.7	36007.3	27841.3	8000	8000	12148.2	13206.8	135509	8000	8000	77318.6	149114	62031.1	8000	44697.3	8000	126868	180351	45596.3	52211.5	8000	116169	352042	79200.9	64861.1
KCS_028	included	T	M	PUT	54.9	22.64	ccRCC	pT1b	G2	N0M0	41648	145409	310614	310213	8000	429152	22765.5	8000	8000	8000	76606.8	49827.1	53869.2	99336.2	82934	109279	32539.3	8000	8000	8000	8000	32888.3	8000	8000	8000	25458.6	11927.1	9086.53	49040.1	8000	11647.2	18241.8	8000	19063.1	8000	22243	40426.1	8000	18733.1
KCS_029	included	T	F	PU	72.8	20.7	ccRCC	pT2a	G3	N0M0	23580.1	102283	405209	364550	8000	230040	105333	40331.8	8000	57696.3	64195.1	100821	20280.6	104848	45710.6	44756.7	21866.5	8000	8063.49	8418.28	10642.1	93443.1	8000	8000	48273.9	88290.6	49256.5	8000	50630	8000	87941.8	95959.2	28334.5	53155.9	8000	62545	168774	42431.6	61851.9
KCS_030	excluded	T	F	PUT	69.9	26.81	ccRCC	pT1a	G2	N0M0	8000	22334	60394	90279	8000	343115	8000	25288.5	8000	8000	9369.09	8000	8000	18102.5	23901.1	33942.6	14615.5	8000	8000	8000	8000	53301.8	8000	8000	28623.6	56219.5	14258	8000	10949.7	8000	48779.4	69698.1	8228.99	18000.8	8000	42844.8	134272	19015.2	21268.6
KCS_031	included	T	M	PUT	32.8	24.8	ccRCC	pT3a	G3	N0M0	1.00266e+06	1.16097e+06	2.13622e+06	2.45753e+06	8000	37844.7	324548	284997	8000	466337	184110	138377	362378	246461	274867	76294	39075.5	8000	17874.7	23130.4	27313.5	189897	8000	8813.92	111973	169029	104234	8000	78759.1	8000	165187	179692	69428.9	90949.2	8000	119449	318897	84578.9	95556.9
KCS_032	included	T	F	PUT	68.2	19.2	ccRCC	pT1b	G1-2	N0M0	11787.5	80620.1	230619	143105	8000	19244.5	8000	15018.3	8000	8000	8000	8000	57085.4	8000	137632	23714.7	12996.3	8000	8000	8000	8000	49731	8000	8000	26553.3	60436.3	27749.8	8000	9617.03	8000	40934.2	76482.3	20559.3	31644	8000	44437.5	128490	27167.7	40275
KCS_033	included	T	M	PUT	71.1	24.84	ccRCC	pT1b	G4 (sarcomatoid)	N0M0	114781	376642	2.68647e+06	2.24024e+06	37712.6	8000	745953	271727	29155.2	196048	399352	86491	24663.5	236908	36036	91849.2	49025.3	8000	20282	20524.1	36564.5	182013	8000	8000	93599.6	173566	89541.1	29845.3	131169	10222.2	210226	209692	58438.7	111185	8000	106520	387665	85701.2	135133
KCS_034	included	T	M	PUT	48.1	27.77	ccRCC	pT3a	G2	N0M0	479172	753771	697130	578772	8000	114691	52933.9	58825.7	8000	96325.4	62706.2	76062.7	301401	138477	420810	61461.8	18312.1	8000	12899	8000	11871.8	125213	8000	8000	51841.7	79220.3	55883.2	8000	53597.4	8000	113267	77521	34220.8	40961.7	8000	72903.1	166077	56600.5	43531.8
KCS_035	included	T	M	PU	51.8	37.01	ccRCC	pT3a	G4 (sarcomatoid)	N1M1	211389	352227	1.80643e+06	1.00356e+06	8000	254744	23103.7	181574	8000	345369	136911	77539	17670.6	358577	32488.1	146364	48376.2	8000	33444.5	18799.6	96617	212060	20326.8	11245.3	99586.2	138623	50286	55959.9	227406	19792.1	232391	176777	38085	41098.2	8000	167296	319744	52465.6	65609.8
KCS_036	included	T	M	PUT	75.1	24.91	papRCC	pT3a	G3	N0M0	39916.5	115927	1.02043e+06	475256	8000	10404.9	159329	9521.71	8000	80279.8	57688.8	23141.6	15349.6	163358	18620.5	17511.2	8000	8000	8000	8000	8000	42844.6	8000	8000	19450.5	40764.9	27744.8	8000	19550	8000	52549.4	51028.2	15308.6	17951	8000	27486.6	104224	32331	28578.8
KCS_037	included	T	F	PUT	59.7	31.64	ccRCC	pT3b	G3	N0M0	91472.3	303615	1.51418e+06	554948	8000	49658.7	77777.9	30350	8000	59470.4	102910	116704	19896.4	60592.5	17113.9	38529.1	31057.9	8000	8000	8000	13544.6	29467.6	8000	8000	9208.23	24851	8442.69	16275	52626.1	8000	20099.8	35850	8000	8000	8000	27906.6	52651.8	8000	8000
KCS_038	included	T	M	PU	66.3	32.51	ccRCC	pT1b	G2	N0M0	18819.5	74712.8	319988	363032	18269	15162.8	323705	9055.65	8000	14061.5	30086.5	8000	17904.2	41517.8	45094	38931.4	18000	8000	8000	8361.24	8000	81210.4	8000	8000	47343.4	76718.8	50151.8	8000	21126.8	8000	84982.5	95355.1	33160	43219.7	8000	61283.1	217959	56578.6	49649.6
KCS_039	included	T	F	PU	73	28.01	ccRCC	pT1a	G2	N0M0	95413	280136	1.43246e+06	1.23772e+06	8000	21588.8	150445	84753.2	8000	108405	78672.8	32709.9	71061.7	93758.1	125201	132558	101950	12559.9	25029.2	46075.1	38141.7	192325	10854.6	14905.9	138920	202771	74671.1	8000	78169.9	21389.5	226542	275249	50951.8	75503.4	13395.7	232385	570423	105611	100400
KCS_040	included	T	M	PUT	50.4	27.47	ccRCC	pT3a	G2-3	N0M0	430532	726274	3.15365e+06	2.19523e+06	75578.6	37258.7	1.7653e+06	591994	15790	1.67766e+06	458963	89099.3	25944.6	2.14426e+06	40851.7	88922.8	64289.5	8792.56	48428.5	46402.8	31663.5	283042	8000	9918.85	164213	289063	207983	8000	121638	17033.2	301297	338057	143441	201919	8000	184246	628177	279573	246463
KCS_041	included	T	F	PUT	72.6	31.25	ccRCC	pT1a	G2	N0M0	114974	210081	426472	400981	8000	205794	319767	104800	8100.29	215942	167610	103470	170069	389042	335243	24750.9	8000	8000	8000	8000	8000	59332.9	8000	8000	32796.8	46643.6	28989.8	8000	21335	8000	54050.4	68807.5	22135.7	35536.1	8000	42334.9	121416	28246.4	50071.1
KCS_042	excluded	T	M	PUT	74.9	30.04	oncocytic adenoma	n.d.	n.d.	n.d.	37853.4	117650	501156	883976	8000	25434.8	20558.2	131443	8000	159693	66983	83732.9	8000	79803.8	8000	22788.6	15910.3	8000	8000	8000	8000	70652.8	8000	8000	31630.2	60862.6	39420.5	8000	29870.9	8000	62464.7	74432.8	25228.2	37538.2	8000	54037	136652	37779.2	43843
KCS_043	included	T	M	PUT	50.2	33.21	ccRCC	pT3a	G2	N1M1	30999.3	166963	526705	594087	8000	30138.2	54120.9	29053.4	8000	46422.5	59810.5	43520.6	184222	75755.5	146456	19565	10313.2	8000	8000	8000	8000	31923.9	8000	8000	12619.2	35737.3	8000	8000	31710.8	8000	52244	38785.7	8000	10206.4	8000	31061.8	99524.1	8774.43	13134.5
KCS_044	excluded	T	M	PUT	69.4	32.11	ccRCC	pT1a	G1	N0M0	11323.7	91748.4	476953	297203	8000	8000	29304	8000	8000	8000	12468.6	8000	8000	25868.5	11148	34189.8	27581.4	8000	8000	8000	8000	20347.4	8000	8000	8000	25907.5	14701.5	8000	8000	8000	9065.54	20623.4	8000	20984.3	8000	17110.4	45171.9	8000	22698.2
KCS_045	included	T	M	PUT	80.9	23.66	ccRCC	pT3a	G3	N0M0	438314	519442	1.42049e+06	268343	8000	30763.1	71454.4	182707	8000	74991.6	157287	46149	77206.2	70413.5	181610	76035.9	28882.9	8000	8000	8000	8000	97126.2	8000	8000	58863.3	81874	54811.6	8000	43143.4	8000	119145	103960	34656.8	69229.3	8000	69768.4	229836	56135.2	78732.7
KCS_046	excluded	T	F	PUT	67.1	UNK	ccRCC	pT3a	G3	N0M0	31775.7	88668.5	157196	202832	8000	60553.4	34036.2	8000	8000	8000	8000	8000	8000	8000	8000	8000	8000	8000	8000	8000	8000	22515.8	8000	8000	8000	25921	8000	8000	8000	8000	14885	40678.7	8000	8000	8000	17760.8	71432.2	8000	8952.24
KCS_047	included	T	M	PUT	44.7	35.65	ccRCC	pT1b	G1	N0M0	29181.3	55121.1	27699.3	65047	8000	27948.8	12885.6	8000	8000	18715.7	8000	8000	45351.3	21511.6	45193.3	8000	8000	8000	8000	8000	8000	20474.8	8000	8000	9091.59	37138.5	15506	8000	8000	8000	22413.1	38363	13083.8	11763.7	8000	26929	92014.3	39946.5	21809.3
KCS_048	included	T	F	PUT	64	29.74	ccRCC	pT3a	G3	N0M0	33712	96541.6	303498	216066	8000	163265	38260.5	13623.4	8000	18847.1	17869.9	12598	32500.5	8000	45843.6	18714.8	11455.9	8000	8000	8000	8000	53599.9	8000	8000	29066.1	64882.5	34116	8000	25850.2	8000	55405.8	82370.1	23119.1	36123.6	8000	64020.7	151620	41624	48153.9
KCS_049	included	T	M	PUT	70.7	31.02	ccRCC	pT3a	G3	N0M0	79957.1	215011	462677	582480	9288.35	145571	134956	379243	8000	196421	202380	77233.7	183539	120325	481283	48365.5	25108.7	8000	8000	8000	8000	63542.9	8000	8000	29813.4	61726.4	40206.6	8000	19586.3	8000	37600.6	67016.8	22548.2	53516.4	8000	39253	113035	33093.2	61768
KCS_050	excluded	T	F	PUT	78	27.48	ccRCC	pT1b	G2	N0M0	35889.6	63235.3	662231	268000	8000	8000	140741	8000	14531.3	8000	8000	8000	8000	17376.7	8000	10518.8	8000	8000	8000	8000	8000	17566	8000	8000	8000	13739.7	8000	8000	37350.7	8000	23132.5	17104.7	8000	8000	8000	28922.4	42626.2	8000	8000
KCS_051	included	T	M	PUT	59.2	24.78	ccRCC	pT3a	G4 (sarcomatoid)	NxM0	425415	1.0548e+06	1.19792e+07	2.90378e+06	39697	45384.4	194776	612978	8000	2.1881e+06	297112	228178	48511	360675	42667	210096	80902.5	8000	81352.5	44075.8	151595	415993	42008	16036	211206	240709	193567	131982	448955	24385.9	453059	237422	133214	109674	17179.1	246713	498317	227626	130460
KCS_052	included	T	M	PUT	77	24.76	ccRCC	pT3a	G3	N0M0	23304.1	701439	3.16672e+06	4.56433e+06	166719	157498	1.53973e+06	540336	365472	2.43298e+06	2.05448e+06	2.09752e+06	112564	4.89079e+06	153325	52233.5	34327.2	8000	8000	8727.23	10924.9	84627.2	8000	8000	40186	80019.9	33366.6	8000	53920.4	8000	69704.8	83475.2	16723.5	40052.6	8000	63002.3	142155	27792.8	42191
KCS_053	included	T	M	PUT	58.3	23.67	ccRCC	pT1a	G3	N0M0	416715	488575	1.66646e+06	795939	8000	24767.9	49770.3	99683.9	8000	175331	85091.6	102330	67586.8	138092	91002.3	64527.5	27966.3	8000	11915.3	11885.2	33473.8	159166	8000	8000	83521.9	142698	73149.1	9833.14	78477.4	9075.88	127245	162432	44510.6	68478.8	8000	113502	250300	57498.9	74881
KCS_054	included	T	M	PU	67.9	35.64	ccRCC	pT1a	G2	N0M0	226787	383132	1.41455e+06	1.2e+06	42550.2	229118	817380	352352	86293.4	388403	243522	180181	118076	431639	380496	134081	92170.9	8000	9395.48	12751.9	18968.7	100299	8000	8000	49626.4	111732	35794.2	8000	59615.7	8262.49	98134	138236	18470.3	51332.2	8000	115923	260377	39829.2	60114.3
KCS_055	included	T	M	PUT	40.5	27.45	ccRCC	pT1b	G1	N0M0	375806	773021	2.13998e+06	1.61132e+06	8000	407508	699420	264814	8000	756849	247811	415536	571000	475800	353329	82757.3	57846.6	8000	12510.9	20854.9	20392.4	144860	8000	8000	73752.8	142088	83261.1	8000	47628.4	13442	114226	155719	51079.2	93200.9	8000	121460	304017	78603.1	108962
KCS_056	included	T	F	PUT	44.4	21.45	ccRCC	pT1b	G1	N0M0	649362	1.11255e+06	1.67651e+06	1.12111e+06	28537.2	1.05049e+06	154778	489491	8000	555692	238066	130339	253752	305465	274888	154210	42981.7	8000	63279.2	30814.5	36878.2	276291	12201.8	12253.4	159120	233653	100876	15672.4	274363	18932.3	286503	250285	76746	89556	8000	156637	417820	102779	111804
KCS_057	excluded	T	M	PUT	77.2	31.14	ccRCC	pT1b	G2	N0M0	497263	1.21821e+06	2.62664e+06	2.7733e+06	136968	47057.2	2.47009e+06	21479.2	100685	28535	87668.9	25093.3	8000	146399	8000	60153.6	39742.8	8000	8000	8089.96	12286.7	74132.6	8000	8000	31892.4	93380.8	40417.1	8000	41098.6	8000	64825	109647	24122	41847	8000	97406.7	192432	50143.8	53827.9
KCS_058	included	T	M	PUT	64.1	29.07	ccRCC	pT2b	G3	N0M0	1.28193e+06	1.28916e+06	2.86663e+06	5.10036e+06	48970.4	145588	263547	218930	8000	209335	270231	30849.2	101459	410747	101508	40013.3	14617.9	8000	8000	8000	19570.1	97942.4	8000	8000	45884.1	91438.4	75385.4	8581.75	70162.1	8000	99276.3	100794	51575.8	57266.8	8000	72789.6	194501	84943.6	64331.6
KCS_059	included	T	F	PUT	66.6	30.12	chRCC	pT2a	Gx	N0M0	39465.6	151721	604998	483561	8000	247719	81649	38795.4	8000	41782.7	65120.4	13039.9	107350	48539.5	123323	20246.5	8000	8000	8000	8000	8000	37604.8	8000	8000	20096.2	44453.3	22774.2	8000	18868.7	8000	52936.2	47712.6	12231	30168.2	8000	39557.6	121484	23325	41531.6
KCS_060	excluded	T	F	PUT	79.9	24.34	ccRCC	pT3a	G4	N0M0	234399	1.04166e+06	6.81769e+06	3.06307e+06	8000	71533.3	198947	101887	78093.9	442280	559866	685463	72803.3	1.66985e+06	8000	8000	8000	8000	8000	8000	10179.2	8000	8000	8000	8000	8000	8000	9900.6	34911.2	8000	8188.82	8000	8000	8000	8000	8000	8000	8000	8000
KCS_061	excluded	T	M	PUT	62.7	23.41	ccRCC	pT3a	G3	NxM1	260297	1.0794e+06	8.25154e+06	3.54402e+06	45061.2	41056.2	530735	688008	96914.1	1.7222e+06	619489	567861	14868.5	722351	8000	55885	14363.6	8000	13886.3	8000	51732.6	104206	8000	8000	41361.8	68808.1	43864.5	36902.6	116599	8000	101530	79663.8	25337.1	30524.6	8000	79381.1	148005	52336	45013.8
KCS_062	excluded	T	M	PUT	67.9	33.9	chRCC	pT2a	Gx	N0M0	37577.4	120358	561047	394039	8000	32089.8	43263	20517.4	8000	29030.8	38953.1	28280.8	8000	35934.8	8000	37068.8	10766	8000	8000	8000	8000	39671.9	8000	8000	12619.5	29159.4	9186.35	8000	42478.5	8000	50048.5	29177	8000	8000	8000	30641.2	80076.5	16528.4	8000
KCS_063	excluded	T	M	PUT	53.2	30.74	eosinophilic granular cell subform + ccRCC residuum	pT1b	G3	N0M0	26227.7	80095.5	660086	200871	9944.1	12945.2	80643.2	202573	8000	167008	77000.4	84346.6	8000	77491.4	8000	10618.2	8000	8000	8000	8000	8000	46777	8000	8000	17480.4	51386.9	16958.2	8000	47274.2	8000	70616.1	57443.9	9559.46	19978.7	8000	43800.1	149797	22689.2	21092.4
KCS_064	included	T	M	PUT	68.1	25.35	ccRCC	pT3a	G4 (sarcomatoid)	NxM1	381994	471842	992057	682639	25573.5	142223	119013	311509	8000	362150	201223	201226	212429	147918	293964	35922.2	8000	8000	8000	8000	25900.7	77650.3	8000	8000	32119	46775.6	45922.2	17123.2	88402.8	8000	102143	52043.7	24081.9	21677.7	8000	33598.2	116561	45694.3	30513.6
KCS_065	excluded	T	M	PUT	47.3	30.09	ccRCC	pT2a	G3	N0M0	8000	12992.6	63772.1	36248.8	8000	8000	12367	10984.2	8000	41965.2	8000	8000	8000	32692	8000	21070	8000	8000	8000	8000	8000	65139.5	8000	8000	34647	68623	37429.4	8000	30686.3	8000	81889	67246.5	21855.6	37368	8000	46494.6	157259	38497.6	39995.3
KCS_066	included	T	M	PUT	64.1	22.09	ccRCC	pT3a	G4	N0M1	287188	330780	1.63203e+06	597210	8000	101002	87926	18052.9	8000	113826	46929	34371.9	122255	160065	416019	86498.8	68234.6	8000	11530.4	24589.7	12276.5	135630	8000	8000	68020.1	159489	105291	8000	47146.4	8000	106992	163423	53128.3	129471	8000	97832.9	289783	75636.8	112506
KCS_067	excluded	T	M	PUT	58.6	17.87	ccRCC	pT3a	G1-2	N0M0	8000	105429	364531	248084	10111	57995.5	180245	8000	136740	8000	115378	21741.8	37761.7	285081	96560.3	51598.3	8000	8000	8000	8000	8000	21852.6	8000	8000	9499.78	10205.5	8000	8000	39739.2	8000	26865.8	15042.3	8000	8000	8000	17840.8	33324.4	8000	8000
KCS_068	excluded	T	F	PUT	58.6	23.8	ccRCC	pT1a	G1	N0M0	12741.9	63870.2	158591	83990.3	8000	116684	20739.9	77817.4	8000	41644.8	27095.2	83407.4	56792.2	8000	80418.7	8000	8000	8000	8000	8000	8000	17472.8	8000	8000	8000	11590.1	8000	8000	8000	8000	14472.1	18433.8	8000	9951.16	8000	11932.5	43272.5	10840.5	9031.49
KCS_069	included	T	M	PUT	59.9	24.54	ccRCC	pT3a	G2	N0M0	165431	384733	842394	942841	8000	42340.7	172391	25001.3	8000	34522.6	43290.7	29397.2	22647.8	52610.5	35201.9	102722	59427.8	17237.9	29918.6	47305.6	31956.2	272795	8444.29	11759.3	166063	310896	145801	8000	90225.8	17681.6	264555	335184	95630	182675	8000	188692	610681	128079	182636
KCS_070	included	T	M	PU	56.1	26.6	ccRCC	pT1b	G2	N0M0	14351.5	70951.9	283222	171213	8000	22776.5	104357	169229	8000	144167	119231	110833	10807.8	120470	14946	26832.4	13998.6	8000	8000	8000	8000	83465.6	8000	8000	49916.9	86628.7	43057.2	8000	31977.5	8000	100758	101867	29380.2	44462.5	8000	72872	215859	56788.4	55769.3
KCS_071	excluded	T	M	PU	61.7	22.09	ccRCC	pT3a	G3	N0M0	31515.4	239586	416266	327059	8000	32986.1	8000	19792.3	8000	25060	33681.8	39983.1	8000	52887.6	8000	9257.83	9529.08	8000	8000	8000	8000	13636.1	8000	8000	8000	11531.2	8000	8000	8000	8000	9250.25	10848.6	8000	8000	8000	8000	28517.4	8000	8000
KCS_072	included	T	F	PUT	57.1	24.03	chRCC	pT2b	G3-4	N0M0	158548	1.10677e+06	2.59041e+06	2.93709e+06	8000	63514.3	129622	64633.9	8000	111127	107614	86274.6	70637.4	221785	58220.8	62157.3	41001.3	8000	15999	21719.4	25722.8	180576	8000	10872.6	124506	229351	112323	8189.89	92289.8	15545	226805	288866	93652.3	114675	8000	138833	575444	127899	144286
KCS_073	excluded	T	M	PUT	69	29.64	papRCC	pT2a	Gx	N0M0	172597	366555	2.10538e+06	1.66825e+06	8000	103707	160001	24741.1	33929.6	107364	70190.1	41376.3	8000	222683	41768.7	151902	106844	23652.5	34430.8	53396.5	57919.9	232197	13656.6	31106.9	129326	288739	148256	10353.9	102357	39821.9	187055	325569	104023	145605	14197.3	236520	518404	141734	176788
KCS_074	included	T	M	PUT	71.9	21.72	ccRCC	pT3a	G3	N1M0	190492	675993	3.24042e+06	1.72531e+06	67776.9	83517.2	328581	55834.8	29150.5	93785.8	156330	111781	30654.9	250706	15420.9	110588	59216.7	8000	20180.9	10448.9	28475.7	128070	8000	8000	50399.4	92389.4	35858	33074.7	146304	8000	165738	107232	26005.2	18918.7	8000	83702.2	201270	52226.6	25982.9
KCS_075	included	T	M	PUT	75.7	26.23	ccRCC	pT2a	G3	N0M0	230197	375604	1.7076e+06	1.37847e+06	10650	19953.1	377854	8000	30790.2	15568.9	35739.5	18701.5	69874.8	59374.7	122568	65415.6	46167.9	8000	10996.7	22786.9	10475.2	145577	8000	8000	87364.8	150359	102241	8000	42482.2	8000	141681	187833	65407.8	97781.5	8000	83180	350666	102504	116189
KCS_076	included	T	M	PUT	61.1	27.64	ccRCC	pT3a	G3	N0M0	54869.4	212726	535517	679702	8000	106714	253539	8000	8000	99114.5	9496.55	33031.5	446250	151099	281574	14111.5	8000	8000	8000	8000	8000	49782.9	8000	8000	19267.6	52214.6	75562.5	8000	8728.9	8000	47076.9	57582.8	54247.9	51038	8000	35421.6	136870	135534	68229.7
KCS_077	included	T	M	PUT	69.9	25.15	ccRCC	pT1b	G2	N0M0	29970.2	77142.2	257887	171107	8000	8000	22268	21541.3	8000	34338.4	17252.4	66880.1	11097.4	8000	36488.3	19583.6	10925.1	8000	8000	8000	8000	80482.8	8000	8000	41344.8	87006.1	43870	8000	13936.6	8000	68226.2	107529	30614	41573.8	8000	62752.7	206430	45008.2	52490.5
KCS_144	included	T	M	UT	50.1	33.77	ccRCC	pT3a	G2	N0M0	75665.3	231786	2.18046e+06	890657	8000	8000	116049	58372.5	8000	62217.3	157556	11073.7	15864.2	172375	37237	136513	99499	11960.2	29377.3	52851.4	41065.5	225728	8361.24	25096.3	136884	270138	116014	8000	87398.5	33436.3	243881	317951	74365.1	159506	8000	220304	677023	112659	161394
KCS_078	included	T	M	PUT	55.3	28.53	ccRCC	pT3a	G4 (sarcomatoid)	N2M0	267332	457361	790055	986778	8000	13304.8	49795	84647.2	8000	70395.2	91345.5	106468	35546.4	63359.2	42750.8	45388.5	18938.4	8000	8000	8000	13371.6	107867	8000	8000	72535.1	83986.2	60673.2	8000	68762.4	8000	133245	116626	41887.2	47896	8000	82088.4	221931	61659.4	57942.3
KCS_079	included	T	F	PU	73.3	36.39	ccRCC	pT3a	G4 (sarcomatoid)	N0M1	517250	1.3668e+06	5.63525e+06	3.59911e+06	113022	267114	2.70375e+06	466607	99637.3	1.27836e+06	272577	201635	34779.1	635676	23116.5	129183	60720.1	8000	36122.3	28474.9	84862	232083	30789.2	13773	121168	186004	115664	65929.1	245182	14233.2	270085	213952	76178.6	123803	10369.4	174915	422162	116264	136914
KCS_080	included	T	M	PU	73.5	29.3	ccRCC	pT2a	G3	N0M0	231684	487378	3.08103e+06	3.20873e+06	14896.5	40255.4	343288	121402	40177.8	243628	269268	191923	11501.4	435788	22479.4	58793.4	27984.9	8000	8218.5	11207.5	20248	113792	8000	8000	60922.9	98281.5	62791.6	8000	48737.2	8000	88661.6	114573	45125.7	49032.6	8000	88991.4	197513	57952.3	59080.2
KCS_081	included	T	M	PU	50.5	34.48	ccRCC	pT1b	G1	N0M0	41889.8	161084	388247	457028	8000	44351.8	14967.6	63292.6	8000	27346.5	37418.8	39332	51501.9	13164.2	78934.2	9164.72	8000	8000	8000	8000	8000	27768.7	8000	8000	10333.7	35906.1	11891.6	8000	8000	8000	23546.7	36190.6	8000	13176.7	8000	20900.6	73730.6	8000	12508.6
KCS_082	included	T	F	PU	70.7	44.82	ccRCC	pT3a	G3	N0M0	28331.7	92897.8	527624	272788	8000	99452.5	59536.1	8000	8000	8000	8000	8000	107387	21025.6	100821	12451.4	8000	8000	8000	8000	8000	41810.9	8000	8000	17918	37930.3	25744.5	8000	22076.3	8000	43076.1	38187.8	12349.2	16079.9	8000	28821.9	86105.1	21765.3	23410.9
KCS_083	included	T	F	PU	73.1	21.09	ccRCC	pT3b	G3	N1M0	94295.1	382483	2.78058e+06	1.22612e+06	11257.6	621088	502795	45782.4	12925.2	173221	52806.2	45194	117464	104073	131979	97052.1	40890.8	8000	14716.9	8000	38785.4	138074	8000	8000	78418.3	100594	69456.7	27571.3	107339	8000	151475	120582	46669.7	40626.4	8000	98447.4	223718	65946.9	50459
KCS_084	included	T	M	PU	72.7	31.31	ccRCC	pT3a	G3	N1M1	46576.7	103012	519872	101530	8000	36955.9	102560	68583.7	8000	65262.1	70264.1	39496.8	37964.8	47226.6	18734.5	17636.1	20275.2	8000	8000	8000	8000	30514	8000	8000	10814.5	25719.4	9924.51	19118.3	72667.9	8000	48417.7	35117.5	8000	8000	8000	22596.1	82020.6	10015.3	12672.5
KCS_085	included	T	M	PU	70.4	24.11	ccRCC	pT3a	G3	N2M1	138171	150148	798458	301585	44947.6	84143.5	77594.5	217710	8000	170376	148075	39781.5	148668	90322.6	195820	34048.1	11412.3	8000	8000	8000	12845.5	113117	8000	8000	53376.2	97349	92855	8000	40461.5	8000	113509	92633.6	57488.8	57152.2	8000	60074.2	204041	104158	60617.9
KCS_086	included	T	F	PU	75.3	30.86	ccRCC	pT1a	G2	N0M0	53496.2	135188	523732	305477	8000	210098	26218.6	310372	8000	141045	116006	193420	37975.3	48057	73208.1	49288.9	25858.4	8000	8000	10038.5	16196.9	111344	8000	8000	58590.8	113317	55100.8	8000	66228.2	8000	144543	135424	37325.6	62610.8	8000	101379	331312	78302.6	75622.5
KCS_087	included	T	M	PU	40.6	36.57	ccRCC	pT3a	G3	N0M0	197067	263450	645704	936083	25961.2	258267	235889	48952.9	8000	44620.4	87820.9	53194.2	68506.8	79701	88114.8	72284.8	45752.8	8000	12737	25790.6	31098.3	170308	8000	9064.19	86033.7	185697	105599	8000	72784.6	14329.2	163323	192634	66010.2	101099	8000	139163	369968	106312	106104
KCS_088	included	T	F	PU	78.8	23.81	ccRCC	pT1a	G2	N0M0	101587	537235	1.20693e+06	621383	8000	97142.8	150870	63892.5	8000	171284	92175.4	99218.2	310558	137075	195096	45113.8	25131.6	8000	8000	8000	8000	82950.2	8000	8000	46082.4	73056.2	48726	8000	22036.4	8000	79566.6	88680.4	31730.7	40009.1	8000	55841.5	170649	43909.9	50747.6
KCS_089	included	T	M	PU	65.3	25.14	ccRCC	pT1b	G3	N0M0	285657	1.59156e+06	5.92652e+06	5.62178e+06	127664	149992	285439	2.07323e+06	25731.4	2.80925e+06	795253	435522	23141.2	1.20871e+06	33648.7	69264.2	45603.7	8000	16694.6	18785.5	28366.5	135352	8000	8000	66162.1	125911	65780.2	8075.81	68158.6	8000	98333.6	132041	40681.5	61664.4	8000	82664.6	210860	51740.5	67910.3
KCS_090	included	T	M	PU	76.3	34.95	ccRCC	pT3a	G3	N0M0	124131	271020	1.64286e+06	729524	8000	92944.7	270040	47736.9	17136.2	92316.5	120708	106941	32572.7	147837	56304.6	55556.2	32498.8	8000	8000	14466.6	25346.8	149607	8000	8000	83091.4	135952	90146.5	9308.39	77420	8000	129256	145385	67136.6	89392.6	8000	113639	292255	87212.9	109056
KCS_091	included	T	F	PU	68.2	34.53	ccRCC	pT2a	G1	N0M0	37796.3	193246	513238	705416	65095.3	190233	384491	149023	8000	43709.2	250819	35643.6	139759	99839.4	146467	31933.8	12229.3	8000	8000	8000	8000	63358.2	8000	8000	31341.8	69877.5	28419.8	8000	33338.1	8000	66591.5	80502.7	12588	28687.7	8000	59041.6	146082	21820.8	33152
KCS_092	included	T	F	PU	61.7	34.21	ccRCC	pT2a	G1-2	N0M0	37493.9	125670	1.13832e+06	480865	8000	297671	177775	18537	8000	31754.7	15382.5	8000	121069	73501.8	163432	63058.1	32459.6	8000	8000	8000	8000	58722.6	8000	8000	28881.1	47307.5	23716.2	8000	26616.5	8000	45597.5	55570	9790.9	21016.2	8000	64932.7	126398	24516.3	24836.9
KCS_093	excluded	T	M	PU	77.3	20.42	ccRCC	pT3a	G2	N0M0	45531.4	130998	1.68764e+06	625652	8000	13306	219768	8000	8000	17759	8000	8000	8000	91238.9	8000	27841.8	20761.7	8000	8000	8000	8000	40064.6	8000	8000	20719.8	39602.3	12625.2	8000	13300.5	8000	37098.8	45581.5	8000	12262.5	8000	49158.5	94253.5	14068.8	18150.1
KCS_094	included	T	M	PU	36.1	24.06	ccRCC	pT1b	G2	N0M0	515709	607877	1.84377e+06	1.16727e+06	8000	16193.8	29003.3	8000	8000	62985.9	25469.8	31398.7	19941.3	83567.1	43129.7	61954	35838.5	8000	15847.7	24842.7	25466.7	196776	8000	8113.49	102381	189972	90624.5	8000	82566.9	14072.7	201627	206888	60881.5	92385.9	8000	164022	437249	110813	106728
KCS_095	included	T	M	PU	55.7	26.12	ccRCC	pT2b	G2	N0M0	150544	338696	1.59954e+06	728367	8000	75567	90572.5	25965.5	8000	173287	40160.8	157628	63419.5	156115	74719.9	31983.9	13190.8	8000	8000	8000	8847.36	92049.5	8000	8000	52465.1	88814.8	55878.2	8000	54154.7	8000	88087	98873.1	32296.1	62778.3	8000	81969.5	190942	49369.2	62399.4
KCS_096	excluded	T	M	PU	82	26.99	papRCC	pT3a	G1	N0M0	8000	64530.1	472329	310030	8000	21535.8	17826.4	8000	8000	12278.8	8000	9004.1	8000	22441.5	8000	10396	8000	8000	8000	8000	8000	39298.9	8000	8000	21606.1	44403.1	24505.9	8000	13449.4	8000	51199.5	62862.3	17692.6	25915.4	8000	37109.1	123970	35183.6	35970.5
KCS_122	excluded	T	M	PU	76.2	20.02	papRCC	pT1b	G1-2	N0M0	457217	847868	1.52387e+07	8.80107e+06	8000	64004.7	1.04876e+06	8000	278646	269865	76256.2	311797	11511.6	1.61646e+06	8000	176115	35951.2	8000	15334.2	8000	20290.9	82461.7	8000	8000	24480.5	36780.6	37195.8	16309.6	88675.4	8000	95547.8	33029.4	17661.7	18873.4	8000	42866.2	82937.9	28507.1	20325.6
KCS_117	included	T	M	PU	73	28.09	ccRCC	pT3a	G2	N0M0	163940	480690	1.40942e+06	715350	8000	61504.2	225737	8000	23546.7	48470.1	51687.5	57649.3	35382	118019	81382.2	78996.8	43293.8	8000	8024.05	13608.7	8000	101611	8000	8000	39170.1	106545	83671.4	8000	42790.4	8000	61263.7	93600.3	34763.5	83462.1	8000	98230.6	152429	43833.5	66543.2
KCS_116	included	T	M	PU	52.1	31.8	ccRCC	pT1b	G3	N0M0	87745.7	258604	586394	470759	13965	343831	302656	128325	8000	135240	126623	67082.2	31407.4	149152	24114.7	75477.2	29594.8	8000	8000	8000	8000	50607.2	8000	8000	17583.6	57773.5	36382.3	8000	9039.3	8000	28700	46486.2	17214.3	47776.2	8000	18481.5	82291.4	23410.1	46663.5
KCS_111	excluded	T	M	PU	70	30.04	ccRCC	pT1a	G1	N0M0	239105	693365	628625	1.20256e+06	8000	144612	186817	217078	8000	261306	90162.7	85958.7	129059	118556	158141	34682	9407.63	8000	8000	8000	8000	15782.7	8000	8000	8000	11179.8	8000	8000	14266.5	8000	30639	16312.6	8000	8000	8000	12319.4	59501.5	8000	8000
KCS_120	included	T	M	PU	57.1	26.7	ccRCC	pT1b	G2	N0M0	168104	237722	708728	486965	8000	123957	174143	65186.9	8000	177456	83742.8	102894	64831.1	167047	129861	73485.2	43596	8000	8000	8050.48	8000	42620.4	8000	8000	9743.18	51403.7	42854.2	8000	8000	8000	8036.25	42618.3	13961.6	38602.6	8000	50752.1	64913.4	12995.8	30589.6
KCS_115	included	T	M	PU	59.9	24.84	ccRCC	pT3a	G2	N0M0	56606.4	115190	319430	473097	8000	71248.8	31876.3	10570	8000	9185.07	10748.3	8000	100502	31030.7	139511	32679	8000	8000	8000	8000	8000	38658.7	8000	8000	29057.2	35817.6	21196.2	8000	16803.7	8000	48862.7	49197.4	11245.1	19244.1	8000	32335.5	100424	20013.5	24822.8
KCS_113	included	T	F	PU	31.4	23.14	ccRCC	pT2a	Gx	N0M0	326764	643345	1.21067e+06	974869	8000	1.65196e+06	101870	392058	8000	405474	391307	240636	85454	472057	73460.1	75971.9	54057.6	8000	12031	16803.6	18140.6	138746	8000	8000	72998.2	121519	84756.6	8234.73	77979.9	8000	132890	141089	54044.3	81465	8000	114923	270229	95187.7	88262.4
KCS_114	included	T	M	PU	66.7	24.09	papRCC	pT1b	G2	N0M0	45604.3	444878	4.98932e+06	2.25806e+06	24038.7	50817	284086	618097	57566.6	820813	460561	1.14697e+06	37912.9	423364	10771.9	35653.7	18247.8	8000	8000	8000	8000	65427.4	8000	8000	24845.6	56548.1	80619.1	8000	17247.5	8000	45199.5	52265.6	37205.2	72738.9	8000	36707.6	103330	40711.2	76267
KCS_112	included	T	M	PU	65.5	26.73	ccRCC	pT1a	G1	N0M0	52825	159636	711289	210735	209876	67049.8	279472	1.09122e+06	8000	290914	159811	77187.4	50183	86042.1	58833.4	34604.9	21170.6	8000	8000	8000	10882.4	90118	8000	8000	33474.6	89298.8	55290.9	8000	37512.2	8000	72441.9	99912.9	35246	46514.3	8000	76331.4	186748	54633.9	61002.4
KCS_121	included	T	F	PU	38.7	26.42	mcRCC	pT1b	G1	N0M0	533919	1.36788e+06	1.58684e+06	2.57275e+06	8000	253116	162644	127396	8000	163214	198910	80851.9	579168	225196	432361	74553.1	49696.1	8000	12005.4	15530.9	20349.5	156169	8000	8000	79476.5	132928	101373	8000	48767.8	9524.57	102767	160682	68134.5	85154.5	8000	101189	257348	87383.2	111115
KCS_118	included	T	M	PU	77.7	24.68	ccRCC	pT3b	G4 (sarcomatoid)	N0M0	227766	699924	4.11884e+06	814628	8000	19975.1	149127	171172	8000	292702	120597	74496.7	16939.7	107864	14689.7	73629.3	39074	8000	8410	10850.8	26038.5	99541.6	8000	8000	49183	103504	61667.9	8000	66627.5	8000	90244.3	106232	32762.9	54911.5	8000	93696.8	201032	57828.5	60896.8
KCS_119	excluded	T	M	PU	74.7	32.87	ccRCC	pT1a	G2	N0M0	115783	418625	1.71864e+06	1.79885e+06	50899.7	24035.2	528502	128401	11626.8	57300.7	327357	49116.6	26284.7	264037	8000	38289.1	17255.1	8000	8000	8000	8000	45976.6	8000	8000	15896.3	44838.2	13720.7	8000	18967.4	8000	33213.7	37644.2	8000	14335.6	8000	46384.8	80436.8	9503.63	10641.7
KCS_123	included	T	M	PU	75.8	30.12	papRCC	pT3a	Gx	N1M0	169914	368611	808940	633833	8000	38262.3	33604.7	88656	8000	49648.7	126124	64672.9	47734.3	73181	42907.1	94721.7	65687.9	8000	13417.9	13861.4	18485	77071.8	8000	8582.27	39140	86301.9	63349.1	8000	49874.6	10622	57533.6	101303	41423.5	65294.4	8000	80486.1	161580	54237.3	66772.4
KCS_124	included	T	M	PU	69.8	30.61	ccRCC	pT1a	Gx	N0M0	286835	510365	2.31703e+06	509348	152663	191675	1.15847e+06	278593	20921.8	213839	528156	112464	74265.1	450441	124888	156245	130673	19176.3	22654.8	38452.5	23009.7	147566	8000	13025.2	69496.4	183155	104648	8000	63982.4	12965.1	98293.2	199301	61285.8	112017	8000	162161	296919	80811.2	110795
KCS_125	included	T	F	PU	66.5	20.28	papRCC	pT1b	Gx	N0M0	64414.3	186554	429536	375574	21127.4	116459	167381	172620	8000	85008.7	287798	109450	198481	179817	274087	21311.5	10567.8	8000	8000	8000	8000	36793.1	8000	8000	16426.5	37980.2	24182.2	8000	11462.3	8000	29548.3	48648.7	10989.3	22843.3	8000	35849.2	91077.5	20754.3	32199.8
KCS_126	included	T	F	PU	76.1	28.28	ccRCC	pT1b	G2	N0M0	23201.5	50986.6	695730	166959	8000	68895.2	10331.1	80085.7	8000	81513.4	36000.7	51905.8	8177.21	15523.3	14757	22965.7	8000	8000	8000	8000	8000	52408.2	8000	8000	21589.8	37909.3	10480.8	8000	40526.3	8000	77558.2	45442.2	8000	8000	8000	32400.8	118784	14880.9	10853.1
KCS_127	excluded	T	M	PU	66	29.07	papRCC	pT2a	G2	N0M0	61785.7	161441	1.03732e+06	787157	12505.6	348320	371495	167726	8000	177345	124968	37012.3	21967.7	154979	8000	18846.6	9496.3	8000	8000	8000	8000	50388.4	8000	8000	15205.3	56434.1	20933.7	8000	8159.34	8000	34772.1	62782.6	10814.2	27366	8000	36405.8	93035.2	29282.7	33976.5
KCS_128	included	T	M	PU	75.3	31.02	collecting duct carcinoma (CDC)	pT3a	G4	N0M0	228127	297237	1.6008e+06	1.25402e+06	8000	123398	494066	8000	58558.4	53171.6	32491.1	12699.3	18384.1	152914	19485.9	101537	20010.7	8000	8000	8000	13395.4	78538.7	8000	8000	24499.1	45630.6	21085.8	8000	73750.3	8000	112289	52765.6	12857.4	17000.1	8000	27150	112063	21757.9	22157.5
KCS_129	included	T	F	PU	63.3	26.3	ccRCC	pT1a	G2	N0M0	105105	515585	918707	1.20218e+06	13628.1	235752	1.45686e+06	30439.4	46861.6	43414	186216	25922.8	284419	210387	349797	116416	101106	19493.3	20450.9	43515.6	36496.7	222434	8865.66	17578.8	125193	260675	106972	8000	65537	31521.7	154100	296904	67640.1	148227	8000	192394	460448	91415.1	174042
KCS_130	excluded	T	M	PU	83.6	27.45	papRCC	pT1a	G2	N0M0	53337	73873.6	750052	209434	8000	11825.3	56695.9	16558.8	8000	120733	8834.77	40948.9	10175.4	37369.8	8000	16869.1	8000	8000	8000	8000	8000	27729	8000	8000	10629.7	16332.5	14934.7	8000	23365.2	8000	52412.2	23193.6	8000	18463.2	8000	21661	68408.9	29103.1	20295.8
KCS_131	included	T	F	PU	75.7	24.84	ccRCC	pT1a	G1-2	N0M0	177301	587239	644633	987398	8000	391335	170207	11017.8	8000	83579.3	35173.3	33385.1	421754	91718.1	703307	73654.8	35205.4	8000	8000	8000	8000	95638.6	8000	8000	48616	61125.7	45877.1	8000	18116.9	8000	78286.9	71034.8	30864.3	34146.2	8000	35534.6	137162	49453	46962.9
KCS_132	excluded	T	M	PU	70.1	23.66	ccRCC	pT1a	G2-3	N0M0	8000	8858.77	48373.1	8517.41	8000	303449	28211.8	8000	8000	16237.5	13720.4	21553	96641	8000	21824.9	8000	8000	8000	8000	8000	8000	8000	8000	8000	8000	8000	8000	8000	8000	8000	8000	8000	8000	8000	8000	8000	8000	8000	8000
KCS_133	included	T	M	PU	66.9	26.73	ccRCC	pT1a	G2	N0M0	292398	515974	4.44329e+06	1.98433e+06	8000	47892.6	132925	224184	8000	457869	163747	137119	43639.3	578777	32797.1	44227.3	27266.2	8000	8000	8000	8000	37891.7	8000	8000	10138.3	32836.5	43619.9	8000	8856.29	8000	19811.8	20718	16339.2	37503.2	8000	27881.1	58435.9	28370.9	37096.4
		number of INT 8000 in N group									1	0	0	1	46	0	3	7	61	1	3	4	1	2	1	2	6	46	22	17	20	1	51	35	3	1	2	61	8	30	0	1	5	2	56	2	0	3	2
		number of INT 8000 in T group									5	0	0	0	66	6	3	17	72	8	8	12	14	6	16	5	20	92	63	59	49	2	90	83	9	2	9	78	8	79	1	2	19	11	95	3	2	11	8
		% of INT <8000 in N group									1.42857	0	0	1.42857	65.7143	0	4.28571	10	87.1429	1.42857	4.28571	5.71429	1.42857	2.85714	1.42857	2.85714	8.57143	65.7143	31.4286	24.2857	28.5714	1.42857	72.8571	50	4.28571	1.42857	2.85714	87.1429	11.4286	42.8571	0	1.42857	7.14286	2.85714	80	2.85714	0	4.28571	2.85714
		% of INT <8000 in T group									5	0	0	0	66	6	3	17	72	8	8	12	14	6	16	5	20	92	63	59	49	2	90	83	9	2	9	78	8	79	1	2	19	11	95	3	2	11	8
		minimum > 7500									11323.7	8858.77	20403.1	8517.41	7552.01	7643.29	7958.74	7662.14	7825.42	9185.07	7733.23	7981.6	7783.23	7584.65	7765.81	7628.56	7537.97	7624.04	7560	8050.48	7943.39	10341.5	7600.3	7590.23	8734.33	8314.13	7951.04	7904.78	7538.21	7619.48	8036.25	10848.6	8228.99	7779.06	7693.07	11932.5	24251.1	8069.26	8952.24
		QC monitoring	AVG								189557	342599	1.38899e+06	762944	1777.68	84203.8	185414	140248	1366.59	172079	117676	162853	44118.2	140071	61100.5	92633.1	51383.8	3086.68	24341.4	28859.9	30714.9	208313	6344.66	7843.04	122447	209282	116030	7357.34	101289	14013.8	230016	247079	82680.2	115455	2461.99	157209	478234	131646	137957
			S.D.								18764.3	25851.4	133211	80915.8	1803.7	19394.9	18676.8	20813.2	1490.18	23423.4	12504.9	25081.3	6351.75	13765.1	12737	17007.5	11131.2	2562.78	7595.81	9245.22	9104.91	38769.2	3117.97	3929.95	22310	37787.4	23391	2957.54	20422.9	4970.75	41759.1	46326.2	15993.3	25032.6	2407.84	30483.3	78945.7	23900.9	26328
			RSD								9.89905	7.54567	9.59047	10.6057	101.464	23.0333	10.073	14.8402	109.044	13.6121	10.6265	15.4012	14.3971	9.82722	20.846	18.36	21.6628	83.027	31.2053	32.0349	29.6433	18.6111	49.1432	50.1075	18.2201	18.0558	20.1595	40.1985	20.163	35.4703	18.1549	18.7495	19.3436	21.6817	97.8005	19.3902	16.5077	18.1554	19.0842
[truncated: 24 more columns]

## Sheet: Data S1C
Data S1C. Clinical data together with raw intensities of individual lipids in tissue samples. Explanation of abbreviations is as follows: N - nonneoplastic tissue, T - tumor tissue, UNK - unknown, QC - quality control, M - males, F - females, ccRCC - clear cell renal cell carcinoma, papRCC - papillary renal cell carcinoma, chRCC - chromosome renal cell carcinoma, mcRCC -multilocular cystic renal …
Sample code	Tissue part	Gender	Measured types of samples (P = plasma, U = urine, T= tissue)	Age	BMI	Type of tumor	Tumor stage	Tumor grade	NM code	IS_SM 18:1;O2/12:0	SM 32:1;O2	SM 33:1;O2	SM 34:2;O2	SM 34:1;O2	SM 34:0;O2	SM 36:2;O2	SM 36:1;O2	SM 38:1;O2	SM 39:1;O2	SM 40:2;O2	SM 40:1;O2	SM 41:3;O2	SM 41:2;O2	SM 41:1;O2	SM 42:3;O2	SM 42:2;O2	SM 42:1;O2	IS SHexCer 18:1;O2/12:0	SHexCer 34:2;O2	SHexCer 34:1;O2	SHexCer 34:2;O3	SHexCer 34:1;O3	SHexCer 34:0;O3	SHexCer 36:2;O2	SHexCer 36:1;O2	SHexCer 36:2;O3	SHexCer 36:1;O3	SHexCer 38:2;O2	SHexCer 38:1;O2	SHexCer 39:2;O2	SHexCer 38:2;O3	SHexCer 39:1;O2	SHexCer 38:1;O3	SHexCer 38:0;O3	SHexCer 40:3;O2	SHexCer 40:2;O2	SHexCer 40:1;O2	SHexCer 39:1;O3	SHexCer 38:0;O4
Inclusion criterion 1										IS	include	exclude	include	include	include	exclude	include	include	exclude	include	include	exclude	exclude	include	include	include	include	IS	include	include	exclude	include	exclude	exclude	include	exclude	exclude	include	include	exclude	exclude	exclude	exclude	exclude	exclude	include	include	exclude	exclude
KCS_145	N	M	T	66.8	20.7	ccRCC	pT3a	n.d.	NxMx	141109	56686.6	73810.9	23906.3	1773844	70606	8000	252394	157143	20003.8	40426.2	303091	15369.8	45662.4	91747.1	30801.7	287338	283456	1582535	20141.5	905490	8000	147144	8000	8000	88333.1	8000	8000	31999.5	204092	8000	8000	10000	38286	8000	8000	192208	950474	8000	8000
KCS_146	N	M	T	67.5	30.2	ccRCC	pT3a	n.d.	NxMx	249276	52024.8	31527.5	47093.7	1709463	56183.3	8000	238745	158125	8000	93555.8	339354	8000	29560.4	110491	130821	622784	370928	3241708	123363	2602246	8000	349847	8000	50424	224449	11000	41087.2	205405	512469	8000	20240.9	78547.2	106661	43801	8000	838639	3753065	8000	8000
KCS_147	N	F	T	80.3	28.4	ccRCC	pT1a	n.d.	NxMx	136843	44620.8	66097.3	18505.1	1404216	68290.2	8000	277846	207143	22453.2	70466.2	336937	8000	26328.6	81143.8	48323	341246	326876	2503911	104835	1531904	8000	375120	8000	48022.5	200200	37663.5	59734.2	185519	394678	8000	26013.5	72278.7	154248	8000	8000	683560	1911226	8000	8000
KCS_148	N	M	T	59.1	30.4	ccRCC	pT2b	n.d.	NxMx	243778	37743.4	42200	51592.1	2464886	82481.4	50178.1	516276	421975	26428.8	149516	665570	8000	31860.3	109184	157933	921754	610740	2357048	32536.8	779056	8000	330177	8000	8000	83302.3	22257.5	65448	76258.2	289432	8000	19264.5	51441.5	229379	8000	8000	350967	1585774	49900	8000
KCS_149	N	M	T	74	30.7	ccRCC	pT3a	n.d.	N0Mx	168960	62155.3	47324.8	43314.3	2654845	104006	23978.8	403614	315060	15539.9	121226	527414	8000	30732.9	94441.1	127309	751003	506854	1268965	92653.6	1404398	8000	404813	8000	20440	166304	56249.1	91407.2	117342	278255	8000	29286.4	43092.8	198681	8000	8000	459596	1414597	8000	8000
KCS_150	N	M	T	18.6	19.6	Wilms tumor (EWING SARCOMA)	-	-	-	184756	66932.1	52000	25426	2148562	86424.6	16200	360495	379777	47589.2	135050	706118	8000	44656.5	146611	166582	854223	736778	1857195	90982.7	1437373	8000	428204	8000	46211.9	168255	47727.1	89003.1	182689	580293	8000	36490.9	123535	341265	30000	8000	754595	2981614	111063	8000
KCS_151	N	M	T	74.2	28	ccRCC	pT1a	n.d.	NxMx	190045	64112	64893.9	24278.5	2350161	86303.8	23536.7	534674	427388	36960.1	89095.4	589880	8000	17541.8	111033	84362.9	492442	466862	1634417	20091.8	743559	8000	299076	8000	8000	108168	24763.4	78881.9	66003.1	279550	8000	13000	75198.1	228212	21399.4	8000	316252	1475177	82372.8	8000
KCS_152	N	M	T	76.6	28.3	ccRCC	pT1b	n.d.	N0M0	183626	42652.5	53832.1	19374.6	2031020	68970.2	8000	422647	310394	14278	66693.9	452568	8000	20934.3	94527.6	83340.9	514891	380385	1595310	55127.2	1348174	8000	540471	8000	18938.8	148168	8000	88108.8	93155.4	345604	8000	16002.4	87213.9	263523	26850.7	8000	387385	2097659	84186.3	8000
KCS_153	N	M	T	81.7	UNK	papRCC	pT1b	n.d.	N0Mx	196836	31595.6	32800	22011.3	2186419	50193.2	21777.3	475836	403328	16426.1	72557.8	509002	8000	8000	88420.7	84079.6	506308	420446	1409385	24161.9	866813	8000	196109	8000	8000	116395	8000	22546.7	84881.7	285058	8000	8000	27321.3	100164	8000	8000	285736	1233172	8000	8000
KCS_002	N	M	PT	80.1	27	ccRCC	pT3a	G2	N0M0	174532	56446.5	50027.3	23138.4	1926280	65333.2	10000	338039	306061	27047.3	98289.2	498423	8000	33698	97551.8	89886.7	596774	525523	1371283	11759.5	657933	8000	214356	8000	8000	60548.3	15928.5	16704.1	28697.2	185322	8000	8000	34463.4	98091.8	13152.5	8000	195828	1095378	8000	8000
KCS_003	N	M	PT	59.2	27.7	ccRCC	pT1a	G2	N0M0	213711	64815.4	62083.8	35892.1	2325008	77680.4	8000	354255	347243	33954.1	99816.7	568958	8000	30293.7	145517	84735.4	598581	584403	1566878	87014.5	1673339	8000	680214	15000	13422	178768	36725.7	166362	133668	485457	8000	35345.5	172812	447504	92407.2	8000	718311	3923721	172350	40389.2
KCS_004	N	M	PT	75.5	34.4	ccRCC	pT3a	G2	NxMx	229251	39811.8	44426.7	59116.4	2972392	119451	63460.8	611710	464993	18400.4	139759	655895	8000	17469.6	92784.4	141309	717925	551630	1849687	30824	739838	8000	224262	16000	15807.3	88653.8	55837.3	28876	107190	231057	8000	8000	18622.1	109743	8000	8000	356263	952442	8000	8000
KCS_008	N	M	PT	66.4	UNK	ccRCC	pT1b	G2	N0M0	383040	64993.8	30676.3	26751.2	1931533	75533.8	8000	324656	262463	16935.4	72452.3	429396	8000	20356.1	64559.6	79251.5	603645	446013	3653402	20774.7	709507	8000	285330	8000	8000	68583.8	17852.6	57367.8	34597.2	240381	8000	8000	43896.8	207329	8000	8000	264522	1323953	43974.2	8000
KCS_009	N	M	PT	80.9	18.93	ccRCC	pT1b	G2	NxMx	356480	71151.9	64393.9	67127.3	3607964	129964	24012.4	465878	403220	30731.4	121872	690936	8000	31362.1	149253	163097	853462	652048	2356174	87327.2	2102143	8000	692966	27600	8000	224276	58135.5	188954	120302	557065	8000	34077.7	168122	443052	129407	8000	658104	4208309	171739	62517.3
KCS_010	N	F	PT	36.9	33	ccRCC	pT1a	G2	N0M0	225720	85799.1	68732.9	63188.8	2755109	101897	26523.2	338697	243142	21287.9	141525	518159	8000	29587.4	106728	162546	821805	542316	2050883	172182	1718836	8000	514785	8000	39947.2	145443	102449	69903	153630	315870	8000	10000	100436	209106	41117.8	8000	863132	2407253	79730.3	11600
KCS_011	N	M	PT	64.2	32.5	ccRCC	pT3a	G3	N0M0	269416	78272.2	72988.8	66196.4	2848458	74050.1	78242.6	664369	560976	35770.2	204094	781568	8000	57842.4	117051	240626	1081390	609154	1942558	34110	640778	8000	140065	8000	18808.3	98798.3	54012.8	11000	116294	282540	8000	8000	33512.2	96783.1	8000	8000	433756	1069764	8000	8000
KCS_012	N	F	PT	52.6	31.5	ccRCC	pT3a	G3	N0M0	181649	67730.1	45757	40468.7	1816420	58181.4	12400	223511	201002	23672.9	94986.8	405095	8000	21227.2	108443	66628.7	438060	383944	2272136	228006	2044231	8000	605271	10000	43872.3	192016	35001.5	126350	200001	408385	8000	33878.1	199182	297894	48517.3	8000	1116056	3492101	165410	13565.1
KCS_013	N	M	PT	66.3	27.4	ccRCC	pT2a	G1-2	N0M0	351081	63294.2	52796.7	67379.4	3186746	125962	34698.7	519890	366697	25661.9	132086	629592	8000	31932.8	110866	176568	953696	618971	3270645	160316	2036758	8000	487514	9000	60040.5	216560	60711.3	85340.4	185118	441743	8000	11000	77527.5	220179	25900	8000	778282	2480000	51600	8000
KCS_015	N	M	PT	70.5	30.69	ccRCC	pT1b	G2	N0M0	218137	57822.3	48088.5	37255.6	2106072	72193.1	16200	319325	261279	19104	89986.9	453190	8000	22343.1	98809	105398	602308	460558	2101550	17734.9	921878	8000	232649	8000	8000	79619.5	72824.1	19138.1	47651.2	237208	8000	8000	32203.6	90302.6	12865.9	8000	273736	1289511	8000	8000
KCS_016	N	M	PT	60.3	35	ccRCC	pT3a	G2	N0M0	226976	79408	60672.2	62970.6	2638100	72028.7	33134.9	425705	370352	21693.8	132210	536451	8000	26270.9	95886.2	125794	694969	495285	1998243	59912.7	770179	8000	173090	25747.8	13222.2	72259.4	150157	20000	119898	270033	8000	8000	31417.6	123730	8000	8000	450887	1045964	8000	8000
KCS_154	N	M	T	67.0822	24.38	ccRCC	pT1b	n.d.	N0M0	307703	56568.2	75735.9	73256.2	3367377	113155	47548.9	533250	447011	28009.9	153048	833357	8000	50053.2	134738	230390	1183792	835903	1644292	17814.9	542285	8000	197479	8000	8000	44391.8	75621.3	16899.1	49771.7	171462	8000	8000	19288.1	125704	8000	8000	274996	948798	8000	8000
KCS_017	N	M	PT	52.9	22.64	ccRCC	pT1b	G2	N0M0	327172	57003.6	54000	50237.8	2760394	123496	44684.4	508518	497742	37763.2	166525	818541	8000	44365.3	133682	190969	1171447	835643	2586154	120384	1567862	8000	565836	13000	47008.5	196413	78743.5	112667	212178	524026	8000	12000	97183.8	320836	60579.3	8000	831041	2991207	80000	23025.8
KCS_155	N	F	T	74.7726	UNK	ccRCC	pT3a	G2	N0M0	315461	76134.7	69834.7	47687.1	2916231	207778	13927.7	432614	197320	8000	81690.4	317212	8000	13595.8	74500.1	112668	681166	260406	2784351	14612.4	490368	8000	62627.1	24577.8	8000	56236.8	79280.4	8000	43385.4	108000	8000	8000	8000	8000	8000	8000	181009	505837	8000	8000
KCS_018	N	F	PT	65.7	UNK	ccRCC	pT1b	G2	N0M0	54147	8000	8000	8156.96	582375	8000	8000	104474	92495.6	8000	69176.6	208143	8000	8000	40905.6	60402.7	303923	153618	680296	8000	237701	8000	58600.5	124080	8000	19100	131601	53682.4	32815.2	101300	8000	8000	8000	53300	8000	8000	150834	450038	8000	8000
KCS_019	N	M	PT	77.5	22.99	papRCC	pT2a	G2	N0M0	282771	82948.8	66560.2	79064.3	2835575	202344	25533.1	362489	264512	15726	126323	539841	8000	33858.9	95896.7	179961	984923	598377	5608340	25391.5	602167	8000	237015	8000	8000	33344.7	73298.6	8000	21961.4	118590	8000	8000	8000	28000	8000	8000	176173	531433	8000	8000
KCS_020	N	M	PT	65.7	28.38	ccRCC	pT3a	G2	N1M1	268900	49022.3	33668.8	74436.2	2816438	106126	41583.9	434796	326134	10205.1	143063	502466	8000	25395.4	84038.2	199135	838507	475802	2385950	24102.2	568413	8000	158849	18881.4	8000	54393	67170.9	8000	69551.7	160428	8000	8000	8000	63900	8000	8000	266836	790612	8000	8000
KCS_021	N	M	PMT	51.2	UNK	ccRCC	pT1a	G2	N0M0	602622	100813	62960.5	58484.9	3545036	172055	21337.5	396332	255244	40404.9	121819	762038	8000	42821.7	273314	146272	838364	716936	2977032	112795	2837350	26480.9	1357136	75582.1	11000	200946	28169.1	200573	86551.1	592150	8000	33429	266387	488729	274778	8000	1005507	7408159	237727	156289
KCS_022	N	M	PMT	81.2	23.88	ccRCC	pT1a	G1	N0M0	172666	57096.9	46744.3	58600.2	1850750	53980.7	42694.5	341443	291718	19241.1	127592	433844	8000	25899.9	85616.9	174060	652142	425549	2119573	19287.7	519884	8000	194716	32781.3	8000	44429.3	123170	24800	55032.9	160000	8000	8000	18300	139000	8000	8000	231532	719369	8000	8000
KCS_023	N	F	PMT	81	28.04	ccRCC	pT2b	G2-3	N0M1	199934	57196.4	59492.1	55116.2	2048052	56754	57351.9	440652	329984	28919	154933	523626	8000	43789.7	94171.1	183908	845384	514366	1935543	72309.8	859922	8000	191066	18600	26435.6	106522	102702	17600	127222	258840	8000	8000	32700	107000	8000	8000	464749	1104128	8000	8000
KCS_024	N	M	PMT	54.9	27.08	ccRCC	pT2a	G2	N0M0	348628	88661.5	76635.8	111609	3872759	146128	87114.9	612234	631107	62351.7	275672	1051105	8000	86127	195515	346171	1776485	1120859	1461672	112561	1094998	8000	455517	15000	28936.2	112181	103588	73874	187598	364234	8000	20906.8	63869.2	280479	14000	8000	692290	1702377	65500	8000
KCS_025	N	M	PMT	61.5	24.69	ccRCC	pT1b	G2	N0M0	182888	39208.5	34605.4	26890.6	2137916	66037.6	12749.7	397128	352120	15978.4	90997	571851	8000	8919.2	71688.6	94983.8	644980	524860	1139477	19738.9	494600	8000	198038	8000	8000	52215.4	8000	30856.3	39162.6	162330	8000	8000	10595.6	124324	8000	8000	222506	819252	8000	8000
KCS_026	N	M	PMT	64.7	21.33	ccRCC	pT1a	G2	N0M0	186677	56514.8	62172.2	22793.6	2273639	84990.8	8000	314784	239747	25662.2	58573.8	522494	8000	20474	174857	49420	484331	501430	1179217	82303	3250065	23821.2	621016	38100	8000	217935	8000	102606	69877.5	431608	8000	33892.1	119796	202134	82057.3	8000	482887	3914366	91584.4	14049.3
KCS_028	N	M	PMT	54.9	22.64	ccRCC	pT1b	G2	N0M0	163310	34916.6	14500	27313	1339887	39758.5	16277.4	259895	272293	22033.4	125491	469179	8000	34038.7	87256.7	140972	730233	498552	2435676	61149.8	800481	8000	370588	8000	14999.6	90068.9	38771.8	73651.9	118909	288803	8000	29098	52443.8	234216	13000	8000	534328	1587344	59600	8000
KCS_030	N	F	PMT	69.9	26.81	ccRCC	pT1a	G2	N0M0	157034	30014	25199.2	20455.3	1209901	27696.1	11856.8	215604	192799	8000	91884.9	312951	8000	28612.4	54963.5	79591.6	469064	293093	2522017	58294.7	583067	8000	123820	8000	21274.1	72447.4	29716.2	8000	107626	183896	8000	8000	16972.2	64023.3	8000	8000	390466	801990	8000	8000
KCS_031	N	M	PMT	32.8	24.8	ccRCC	pT3a	G3	N0M0	201789	29707.5	24617.6	23431.3	1251551	29557.3	17119.9	235246	247497	22936.3	120711	440970	31779.5	59077.1	75957.8	151655	772339	473835	2066004	60158.4	555592	8000	134208	8000	33659	73910.9	8000	14380.4	137635	237267	8000	8000	18135	76911.1	8000	8000	499041	981499	8000	8000
KCS_032	N	F	PMT	68.2	19.2	ccRCC	pT1b	G1-2	N0M0	151473	38784.9	45334.3	21329	2166181	81143.2	8000	359011	325345	30737.7	91300.6	541674	8000	21937.4	97640.8	93493.1	623929	512850	1356460	28108	812795	8000	310638	8000	8000	59623	14438	40101.9	51651.3	209900	8000	8000	46621.9	157158	8000	8000	245374	1082793	8000	8000
KCS_033	N	M	PMT	71.1	24.84	ccRCC	pT1b	G4 (sarcomatoid)	N0M0	236820	32075.8	21038.1	8000	1701631	84245.4	8000	245322	161952	11658.8	33594.3	364495	8000	8000	111533	28724.9	315386	297151	1727049	42156.3	1940722	8000	563555	42453	8000	201417	8000	112191	51350	530235	8000	8000	155162	246743	154669	8000	480460	5283562	123242	52209.8
KCS_034	N	M	PMT	48.1	27.77	ccRCC	pT3a	G2	N0M0	198728	39235.3	22200	37690.5	2802388	116284	17396.6	488189	392443	11886.4	86827.3	648351	8000	13493	75818.5	87346.6	729131	554376	1297720	75600.1	1071443	8000	324560	8000	17935.8	148296	20072.3	86501.1	105375	364324	8000	11441.1	70762.4	248999	8000	8000	474208	1815462	8000	8000
KCS_036	N	M	PMT	75.1	24.91	papRCC	pT3a	G3	N0M0	238725	43546.7	34686.7	41152.1	2598182	92887	21149.9	415228	367958	15073	99082.7	618839	8000	15394.5	83168.7	126090	623159	557064	1874849	37540.2	839165	8000	245201	8000	8000	88594.6	13626.6	35640.1	83187.7	286330	8000	8000	41335	141173	30308.9	8000	357166	1562918	8000	8000
KCS_037	N	F	PMT	59.7	31.64	ccRCC	pT3b	G3	N0M0	225385	45194.4	48507.2	26881.2	2013784	61763.1	8000	280451	193892	9614.82	51649.1	302380	8000	8000	71406.8	51947.3	389410	241857	2019575	15250.1	626671	8000	178228	8000	8000	59074.9	8000	10305.5	39942.1	115832	8000	8000	23164	52805.5	8000	8000	199931	749638	8000	8000
KCS_040	N	M	PMT	50.4	27.47	ccRCC	pT3a	G2-3	N0M0	129091	41543.2	46144.7	20462.2	1716537	55588.4	11300	358452	341401	30225.7	100862	486428	8000	23293.2	80459.9	92199	547878	423941	1267579	8000	228974	8000	29627.3	8000	8000	21282.3	8000	8000	29753.7	117015	8000	8000	8000	29000	8000	8000	162112	498285	8000	8000
KCS_041	N	F	PMT	72.6	31.25	ccRCC	pT1a	G2	N0M0	185132	55937.1	47417.9	27035.3	1935038	74200	15293	410777	285086	16062.9	79294.9	378378	8000	14830.5	59326.8	89393.1	537202	373480	1588050	30259.5	689959	8000	169487	8000	8000	75337	44382.6	13818.4	59383.2	209075	8000	8000	22188.3	91420.6	8000	8000	265198	911286	8000	8000
KCS_042	N	M	PMT	74.9	30.04	oncocytic adenoma	n.d.	n.d.	n.d.	147106	23379.7	23400	13972.4	1965154	87546.8	8000	360220	355062	17274.7	64812.9	595835	8000	10671	103667	73185.1	560537	580525	2806140	52349.4	1300242	8000	329393	10000	12329.6	142839	33151.1	33457	102285	364551	8000	8000	41228.1	123628	34095	8000	352661	1577502	8000	8000
KCS_043	N	M	PMT	50.2	33.21	ccRCC	pT3a	G2	N1M1	144949	18018.7	14100	20648.8	1818793	98102.3	8000	289452	220978	8000	39804.1	316724	8000	8000	47178.6	54759	439547	292651	2247115	47556.4	1076241	8000	615698	8000	8000	90226.2	8000	100489	35186.9	198218	8000	9896.54	40085.2	223974	8000	8000	238764	1201466	46835.7	8000
KCS_044	N	M	PMT	69.4	32.11	ccRCC	pT1a	G1	N0M0	249669	61785.8	48714.4	40122.3	2564161	84738.4	33487.2	521612	410816	19909.9	120473	642846	8000	22303	91092.9	134699	748763	495732	2396080	8432.35	554065	8000	197781	8000	8000	63121	8000	21280.9	29996.5	168580	8000	8000	9564.9	90070.2	8000	8000	163105	803356	8000	8000
KCS_045	N	M	PMT	80.9	23.66	ccRCC	pT3a	G3	N0M0	194125	37299.2	8000	30629.6	2124270	80795.4	17379.8	403500	315779	17296.5	87303.6	516881	8000	19582	65146.9	107204	685672	506789	1322356	8000	617390	8000	175201	8000	8000	71750.6	21159.1	19362.9	27369.5	185359	8000	8000	12968.3	81689.4	8000	8000	153457	749723	8000	8000
KCS_046	N	F	PMT	67.1	UNK	ccRCC	pT3a	G3	N0M0	254828	31526.4	19213.6	26684	1424844	68660.9	15484.9	281051	180028	8000	59735.3	310347	8000	9180.82	34817.9	84023.8	414099	291553	2924328	17515.7	311150	8000	53401.2	8000	8000	26830	19784.2	8000	53292.1	116802	8000	8000	8000	23000	8000	8000	246052	486400	8000	8000
KCS_047	N	M	PMT	44.7	35.65	ccRCC	pT1b	G1	N0M0	133456	49138	8000	11862	1676183	54269.8	16400	378403	306488	29618	85657.6	456611	8000	18873.5	82991.4	55820.3	463398	348202	1574813	39999.4	801318	8000	351168	8000	8000	110720	37638.2	75956.1	83485.1	291513	8000	12078.1	70826.1	256867	12400	8000	362304	1429889	103633	8000
KCS_048	N	F	PMT	64	29.74	ccRCC	pT3a	G3	N0M0	117063	27847.3	16800	13384.5	1406179	46091.3	9109.29	258046	216168	8000	46035.3	298277	8000	8000	20472.9	32233.5	310357	230495	1310285	26033.8	564056	8000	161652	8000	8000	59197	47499.5	16246.9	74520.3	195237	8000	8000	11133.9	106474	8000	8000	299679	787585	8000	8000
KCS_049	N	M	PMT	70.7	31.02	ccRCC	pT3a	G3	N0M0	39620	8000	8000	8000	346988	8000	8000	29897.3	26876.4	8000	8000	65916.4	8000	8000	8000	9484.72	124656	75073.6	375746	8000	159318	8000	10488	8000	8000	8000	23267	8000	8000	12364.5	8000	8000	8000	8000	8000	8000	26146.5	266602	8000	8000
KCS_050	N	F	PMT	78	27.48	ccRCC	pT1b	G2	N0M0	218693	48347.1	12000	104365	2271029	62545.4	118234	596722	361714	9991.85	162135	462376	8000	16844	71878.9	194661	803074	351265	1407156	92432.3	803600	8000	211074	168494	70514.9	122492	304073	101938	171423	232135	8000	8000	21646.9	125243	8000	8000	606167	1117807	8000	8000
KCS_051	N	M	PMT	59.2	24.78	ccRCC	pT3a	G4 (sarcomatoid)	NxM0	300992	54205.9	48375	25299.5	1710156	82718.4	18708.7	215388	96040.4	11127.2	59105.1	253847	8000	17225.2	71515.8	68116.2	410621	217532	2005447	10671.4	994723	8000	203112	20580.9	9462.34	411505	8000	88742.1	216743	1939501	8000	39180.1	240434	350137	234083	8000	2103205	21227329	23200	23111.6
KCS_052	N	M	PMT	77	24.76	ccRCC	pT3a	G3	N0M0	224732	61992.7	70225.7	33594.8	2201623	73353.8	45439.7	567124	477033	52016.5	145760	678760	8000	60248.8	129922	150477	950873	618101	1759918	29842.8	668914	8000	172729	10000	24575.7	111683	64012.9	23141.9	117536	277836	8000	8000	35684.1	116738	8000	8000	405566	1115743	8000	8000
KCS_053	N	M	PMT	58.3	23.67	ccRCC	pT1a	G3	N0M0	143070	37054.8	26700	44817.9	2308003	63072.5	32543	395808	372946	28799.3	130862	635049	8000	26677.9	106464	139705	862947	591246	1400546	87312.9	1207141	8000	287609	8000	15221.1	132452	30524.6	51767.2	137710	354347	8000	8000	55116.1	200059	8000	8000	561483	1786449	51600	8000
KCS_055	N	M	PMT	40.5	27.45	ccRCC	pT1b	G1	N0M0	248714	53752.8	24995.7	30014.4	1744679	51430	8000	192959	180496	20807.1	85601.1	487404	8000	16408	176619	49681.7	481848	426569	1597424	105952	2548725	20227.4	1162636	32515.4	20150.8	322889	68140.9	327671	153330	860582	30223.3	86182.4	418430	825888	304892	8000	1435793	9461734	401388	180315
KCS_056	N	F	PMT	44.4	21.45	ccRCC	pT1b	G1	N0M0	191625	42656.4	50123	38987.7	2087487	73605.4	46328.8	485497	411695	24973.8	134590	575911	8000	41033.3	110997	139583	777136	525052	1582483	15312.1	561700	8000	135845	8000	8000	58496.2	71745.6	18349.3	72896.4	399842	8000	8000	82679	134371	8000	8000	275874	1528371	8000	8000
KCS_057	N	M	PMT	77.2	31.14	ccRCC	pT1b	G2	N0M0	152342	23227.7	20516.4	23942.9	1306297	31990.4	25885.1	270048	198799	8000	86964.1	297475	8000	11916	33549.3	83387.8	471370	257566	3136334	20326.5	627663	8000	189521	8000	8000	54569.3	87172.1	11200	56764.5	171393	8000	8000	8000	83600	8000	8000	228407	765431	8000	8000
KCS_058	N	M	PMT	64.1	29.07	ccRCC	pT2b	G3	N0M0	81624.8	9872.29	8000	8000	781487	22505.5	8000	164096	129848	8000	53024.5	264490	8000	8000	41161.2	50598	351770	272242	1030156	14847.6	469692	8000	144202	8000	8000	68778	23313.2	29766.6	60728.5	200429	8000	8000	48405.4	140745	28544.7	8000	358767	1470152	46309.1	8000
KCS_059	N	F	PMT	66.6	30.12	chRCC	pT2a	Gx	N0M0	200056	79216.7	43549.8	69354.2	2396921	89132.9	50630.6	437789	360872	29363.8	153767	579673	8000	35625.8	88263.1	196789	846590	556619	1939347	23594.5	678804	8000	179843	8000	8000	54708.1	118993	12600	70595.9	204404	8000	8000	8000	8000	8000	8000	275820	949402	8000	8000
KCS_060	N	F	PMT	79.9	24.34	ccRCC	pT3a	G4	N0M0	168746	45718.1	30000	71380.1	1973169	57737.9	68442.2	419089	295361	8000	147832	442832	8000	23667.3	76011.1	120346	578574	335237	1409610	111304	1083881	8000	316836	8000	69886.9	156357	8000	92072.5	205007	273326	8000	8000	47410.3	152762	8000	8000	723331	1548857	32700	8000
KCS_061	N	M	PMT	62.7	23.41	ccRCC	pT3a	G3	NxM1	155001	41603.3	32600	38568.3	1406065	26520.4	47960.1	299792	303314	30811.3	168698	477700	8000	32499.5	70704.6	136070	654169	363084	1994354	68656	855295	8000	251968	8000	34233.3	109629	70863.5	33817.6	173435	311351	8000	8000	39126.9	150912	8000	8000	630407	1442569	33000	8000
KCS_062	N	M	PMT	67.9	33.9	chRCC	pT2a	Gx	N0M0	194691	40377.1	14000	30514.2	1631372	69831.9	27635.4	317549	284464	12650.6	122342	455807	8000	15478.7	42079.7	158961	746601	451116	1850466	54447.1	796740	8000	154729	8000	18378	90480.2	54393.6	8293.83	106043	232090	8000	8000	11928.9	77772.4	8000	8000	383754	887289	8000	8000
KCS_063	N	M	PMT	53.2	30.74	eosinophilic granular cell subform + ccRCC residuum	pT1b	G3	N0M0	156553	40806	14700	30202.1	1288606	20000	20413.7	238261	253476	14952.8	136546	401318	8000	19864	69503.5	117002	640669	343899	1748401	30526.5	502873	8000	161214	20000	8000	39532.4	111720	8000	95067.8	203969	8000	8000	15466.9	146106	8000	8000	349860	942012	8000	8000
KCS_064	N	M	PMT	68.1	25.35	ccRCC	pT3a	G4 (sarcomatoid)	NxM1	216602	97523.3	42111.3	28803.5	1737693	64748.4	8000	236483	117837	8000	90171.7	278487	8000	31586.4	79459.5	79553.7	513141	242944	3096398	16156.9	595993	8000	75777.6	8000	8000	55170	8000	8000	17666.5	123343	8000	8000	12000	11846	12209.2	13372.1	202715	994922	8000	8000
KCS_065	N	M	PMT	47.3	30.09	ccRCC	pT2a	G3	N0M0	196888	50693.5	31500	39805.8	2166154	89987.2	18000	322090	269063	20496.3	107104	514228	8000	16319.7	90558.7	85209.2	617575	451839	1077442	25612.4	819382	8000	311735	8000	8000	97702.2	72635	91210.7	46551.4	258475	8000	8000	60271.2	265093	10000	8000	308746	1715471	60566.9	8000
KCS_066	N	M	PMT	64.1	22.09	ccRCC	pT3a	G4	N0M1	148655	58253.9	22200	22375.4	1932718	79175.4	13349.4	345436	280484	8645.91	94444.3	396788	8000	13039.7	48578.8	83023.1	631461	367160	993776	10696.3	702818	8000	353141	8000	8000	64629.7	114373	58245.8	30143.4	195316	8000	8000	20786	198460	8000	8000	176487	998272	33312.3	8000
KCS_067	N	M	PMT	58.6	17.87	ccRCC	pT3a	G1-2	N0M0	148467	69828.2	39000	38073.7	1935957	77619.3	18200	293252	217974	18394.7	119932	362356	8000	24750	54215.2	106032	716338	348793	1443921	33774.2	797364	8000	112311	8000	8000	79885.7	79319.8	8000	61086.4	200884	8000	8000	8000	32000	8000	8000	284624	874203	8000	8000
KCS_068	N	F	PMT	58.6	23.8	ccRCC	pT1a	G1	N0M0	139898	73714.2	54511.2	16895.2	1425505	65787.6	8000	286782	284709	27500.9	102115	436790	8000	29806.3	94354.5	81410.3	522679	389154	1044382	8000	486807	8000	157680	8000	8000	47456	55813.9	11292.9	20673.8	187621	8000	8000	24841.9	103664	8000	8000	153996	888682	8000	8000
KCS_069	N	M	PMT	59.9	24.54	ccRCC	pT3a	G2	N0M0	127000	46325	18700	30546.8	1767073	39993.5	18345.5	348699	252605	13559.1	80158.1	423824	8000	8000	73911.1	38673.1	441974	317199	942851	45276.9	962184	8000	400634	8000	8000	133295	33891	148704	60251.7	269673	8000	8000	74952.8	309754	15598.4	8000	322038	1771319	94230.2	9604.3
KCS_072	N	F	PMT	57.1	24.03	chRCC	pT2b	G3-4	N0M0	137224	52371.9	37300	36010.9	1708961	55989.1	19659.5	261671	198622	14241.4	86223.7	329066	8000	16283.8	75912.7	82570.8	470099	290368	951584	29209.6	829450	8000	394335	8000	8000	69035.5	93620.2	74057	54215.5	188663	8000	8000	42893	213518	11400	8000	292777	1290882	57426.8	8000
KCS_073	N	M	PMT	69	29.64	papRCC	pT2a	Gx	N0M0	118594	31359.3	17100	21347.5	1305191	31728.1	31149.1	315119	261282	11838.9	93284.8	364709	8000	14057.1	44573.8	67737.4	444875	266563	712448	8000	327584	8000	131948	8000	8000	42778.7	75722.1	20288	39097	134200	8000	8000	9162.58	96652.4	8000	8000	163139	593564	8000	8000
KCS_074	N	M	PMT	71.9	21.72	ccRCC	pT3a	G3	N1M0	165828	53024.1	46690.2	25251.1	2233596	66312.9	21026.1	329909	275605	9907.38	103427	424090	8000	23463.7	67031.9	119566	776747	385673	856640	10291.9	467655	8000	48898.8	8000	8000	54623.6	30603.8	8000	33732.3	121566	8000	8000	8000	14000	8000	8000	152535	494699	8000	8000
KCS_075	N	M	PMT	75.7	26.23	ccRCC	pT2a	G3	N0M0	97356.3	37099.6	24800	18667.4	1319845	36602.9	12700	263122	220818	11251.1	93891	376760	8000	15824.1	50038.7	93979.7	522157	381384	913734	8000	360787	8000	105675	8000	8000	30467.9	80074.8	8000	20257.7	127034	8000	8000	8000	65198.6	8000	8000	140963	590355	8000	8000
KCS_076	N	M	PMT	61.1	27.64	ccRCC	pT3a	G3	N0M0	144926	25666.8	16200	29315.9	1472367	38558.2	21877	268245	233134	13224.4	100373	390501	8000	14820	60937.5	84499.5	495310	343521	931976	8000	397858	8000	136466	8000	8000	53966.8	91158.7	27436.3	44834.7	147310	8000	8000	13859	110048	8000	8000	210429	757974	8000	8000
KCS_077	N	M	PMT	69.9	25.15	ccRCC	pT1b	G2	N0M0	114010	36239.5	20400	19471.3	1341527	48704.6	8000	214917	210565	8275.77	67733.5	314677	8000	9280.55	43928.2	94449.9	449877	323801	878252	8000	373501	8000	199112	8000	8000	17942.1	84435	18753.9	17429.5	125689	8000	8000	8000	110022	8000	8000	106923	601743	14000	8000
KCS_144	N	M	MT	50.1	33.77	ccRCC	pT3a	G2	N0M0	187463	61195	28567.9	43069.1	1741481	66917.3	20438.1	287580	243245	8136.75	122666	417910	8000	14810.4	45503	134398	625415	375926	1311159	8000	373744	8000	167837	29100.4	8000	27696	162748	22800	21829.9	112103	8000	8000	9710.82	96624.5	8000	8000	164077	647247	14300	8000
KCS_078	N	M	PMT	55.3	28.53	ccRCC	pT3a	G4 (sarcomatoid)	N2M0	371459	155922	41638	74594.6	3767417	153450	22011.3	478482	140486	8000	91179.1	332091	8000	15023	78819.9	170579	809923	286169	1708922	8000	223705	8000	8000	24112.5	8000	28642.4	80960.7	11622.8	8000	158610	8000	8000	8000	8000	8000	8000	90045.6	1418738	8000	8000
TKCS_145	T	M	T	66.8	20.7	ccRCC	pT3a	n.d.	NxMx	831622	87692.3	55461.1	67345.1	1337808	23705.7	11401.3	126092	59450.5	8000	105535	186296	13419.8	47214.2	54576.8	126619	490877	254894	9998513	22178.7	261289	32995.6	364416	8000	8000	8000	8000	8000	8000	31045	8000	8000	8000	8000	8000	8000	109279	168011	8000	8000
TKCS_146	T	M	T	67.5	30.2	ccRCC	pT3a	n.d.	NxMx	94528.8	8000	8000	8000	556293	8000	8000	19345.2	44726.1	8000	19119.5	157470	8000	8000	33278.1	41046.1	309886	342664	820256	316054	2204604	91168	476309	26000	71881	200533	30498.9	21900	734598	1011527	8000	65632.6	110092	50662.1	8000	25505.8	2021790	2895146	8000	8000
TKCS_147	T	F	T	80.3	28.4	ccRCC	pT1a	n.d.	NxMx	57253.2	8000	8000	8000	555355	8000	8000	62427.8	44178.6	8000	8500.52	142671	8000	8000	8000	8000	192769	93986.4	854748	23452.4	341869	8000	20236.5	8000	12020.1	83923.5	8000	8000	83878	216168	8000	8000	8000	8000	8000	8000	376900	1028454	8000	8000
TKCS_148	T	M	T	59.1	30.4	ccRCC	pT2b	n.d.	NxMx	17209.7	8000	8000	8000	307831	8000	8000	8000	8000	8000	8000	54100.6	8000	8000	8000	8000	86223	37402.3	307315	20003	380578	8000	53355.8	8000	8000	8000	8000	8000	46209.5	103044	8000	8000	8000	8000	8000	8000	191963	404987	8000	8000
TKCS_149	T	M	T	74	30.7	ccRCC	pT3a	n.d.	N0Mx	72116.4	8169.47	8000	10221.7	764646	8000	8000	39288.4	57172.1	8000	25949.7	142573	8000	8000	19849	65686.5	375710	144032	704748	49420.2	485483	8000	24947.3	8000	8000	29892.3	22651.2	8000	53528.5	149546	8000	8000	8000	55288.3	8000	8000	295607	664962	8000	8000
TKCS_150	T	M	T	18.6	19.6	Wilms tumor (EWING SARCOMA)	n.d.	n.d.	n.d.	152206	20401.8	8000	8000	759532	20667.9	8000	275849	89530.1	8000	8000	140753	8000	8000	40518.4	8000	180583	123428	2594715	8000	8000	8000	8000	8000	8000	8000	8000	8000	8000	8000	8000	8000	8000	8000	8000	8000	8000	8000	8000	8000
TKCS_151	T	M	T	74.2	28	ccRCC	pT1a	n.d.	NxMx	171637	23932.1	15300	21502	1712669	25678.8	8000	176382	218727	8000	60252.6	413125	8000	12300	71441	36332.4	440950	338339	2379064	8000	298326	8000	115208	8000	8000	30408.6	8000	8000	60611	150319	8000	8000	8000	8000	8000	8000	242766	516275	8000	8000
TKCS_152	T	M	T	76.6	28.3	ccRCC	pT1b	n.d.	N0M0	101685	8000	8057.26	8000	943408	30605	8000	60522.8	61675.4	8000	16327.5	167721	8000	8000	14513.6	29581.2	275888	143690	1500975	27597.5	411280	8000	259359	8000	8000	16323.2	8000	8000	68509.2	170004	8000	8000	16216.6	8000	8000	8000	395330	834521	8000	8000
TKCS_153	T	M	T	81.7	UNK	papRCC	pT1b	n.d.	N0Mx	44211.7	9357.78	8000	8000	486185	19519.5	8000	13779.3	28920.8	8000	8000	63941	8000	8000	8000	19133.7	186291	99915.2	590526	8000	8000	8000	8000	8000	8000	8000	8413.42	8000	8000	8000	8000	8000	8000	8000	8000	8000	8000	8000	8000	8000
TKCS_002	T	M	PT	80.1	27	ccRCC	pT3a	G2	N0M0	108762	15096.3	10900	8000	845121	13123.1	8000	79937.4	68158	8000	23858.4	177049	8000	8000	29476.9	31139.1	302905	176871	1148039	17135.3	443012	8000	170904	13000	8000	47055.2	8000	8000	87222	205610	8000	8000	15000	52427.8	8000	8000	370206	1117292	8000	8000
TKCS_003	T	M	PT	59.2	27.7	ccRCC	pT1a	G2	N0M0	65733.8	8000	8000	8000	576949	8000	8000	88908.9	134426	8000	55023.6	258814	8000	8000	26813.7	32949.7	247855	236221	765644	114900	821442	8000	99279.1	8000	62946.6	141444	18523.8	8000	469827	487682	8000	8000	49510.7	8000	8000	8000	1361618	1578387	8000	8000
TKCS_004	T	M	PT	75.5	34.4	ccRCC	pT3a	G2	NxMx	75461.6	8000	8000	9240.72	686703	8000	8000	41842.4	34319	8000	21151.1	143736	8000	8000	8000	25698.2	289727	172105	694725	25222.1	394884	8000	76517.6	8000	8000	11300	8000	8000	26116	79400	8000	8000	8000	8000	8000	8000	197591	392104	8000	8000
TKCS_008	T	M	PT	66.4	UNK	ccRCC	pT1b	G2	N0M0	60015	9569.62	8000	8000	663505	8000	8000	122795	109612	8000	32003.1	184084	8000	8000	40762.9	30446.2	244710	148874	980579	33636.2	499426	8000	231444	63657.7	26229.3	132907	28048.1	14000	92404.1	250064	8000	8000	20000	8000	8000	8000	370980	903170	8000	8000
TKCS_009	T	M	PT	80.9	18.93	ccRCC	pT1b	G2	NxMx	63080.3	8000	8000	8000	356584	8000	8000	8000	20875.4	8000	11096.7	167106	8000	8000	13413.9	17866.8	202157	101600	655467	70578.5	372840	31770.5	554676	8000	8000	15540.5	8000	8000	117595	279486	8000	8000	63389.2	8000	8000	29258.3	1276109	2445571	8000	8000
TKCS_010	T	F	PT	36.9	33	ccRCC	pT1a	G2	N0M0	130798	18208.5	14367.1	24729.7	1563642	35609.7	8000	62638.8	38571.8	8000	25790.2	125866	8000	8000	8000	35839.4	361907	186360	1692350	134867	976278	24659.3	370281	8000	8000	47657.2	8000	8000	102498	167498	8000	8000	8000	8000	8000	8000	560990	810840	8000	8000
TKCS_011	T	M	PT	64.2	32.5	ccRCC	pT3a	G3	N0M0	33745	8000	8000	8000	506820	8000	8000	23211.2	49298.4	8000	15794.7	114504	8000	8000	11138.2	13949.5	161307	133990	649142	119762	1345008	8000	54320.9	8000	33205.9	125869	8000	8000	289597	438320	8000	8000	46227.1	20000	8000	8000	1038042	1630280	8000	8000
TKCS_012	T	F	PT	52.6	31.5	ccRCC	pT3a	G3	N0M0	111494	28794.7	13450.5	11474	918796	11300	8000	109897	145950	10341.3	65967.1	326793	8000	13750.3	78875.9	47803.3	382588	257969	1441928	124033	1257027	8000	140553	8000	69274.7	223719	8000	8000	348050	723300	8000	8000	96015.8	8000	8000	8000	1327578	2701060	8000	8000
TKCS_013	T	M	PT	66.3	27.4	ccRCC	pT2a	G1-2	N0M0	232932	23503.9	10020.5	26510.3	1954145	43285.5	8000	93850.2	93541.5	8000	47415.3	249560	8000	8000	21741.9	87623.6	619376	319528	1595408	173524	1596340	8000	131726	8000	8000	69477.7	8000	8000	138331	277416	8000	8000	21000	8000	8000	8000	753969	1502985	8000	8000
TKCS_015	T	M	PT	70.5	30.69	ccRCC	pT1b	G2	N0M0	91284.5	14700.6	8000	8000	847184	27518.3	8000	53262.2	64700.9	8000	35140.4	255491	8000	8000	16925.1	35967.8	294368	232876	1418645	56046.6	593847	8000	157946	23822.5	8000	85759.1	24102.7	15000	138899	381594	8000	8000	52552.9	8000	8000	8000	969625	2931429	8000	8000
TKCS_016	T	M	PT	60.3	35	ccRCC	pT3a	G2	N0M0	160034	217716	80367.8	221503	3819321	203717	69095.3	185364	111659	10286.3	278794	260620	29294	78766.1	55877.1	534199	1693652	411181	1006878	8000	79768.2	8000	47299.3	8000	8000	8000	8000	8000	8000	8000	8000	8000	8000	8000	8000	8000	8000	14423.2	8000	8000
TKCS_154	T	M	T	67.0822	24.38	ccRCC	pT1b	n.d.	N0M0	135705	8000	8000	12271.1	1228400	45893.8	8000	129564	72272.8	8000	42921.5	249553	8000	8000	9605.67	55608.6	355641	174921	1563058	14934.1	292505	8000	35656.1	8000	8000	52566.3	8000	8000	88424.4	8000	8000	8000	30800	8000	8000	8000	734226	1299201	8000	8000
TKCS_017	T	M	PT	52.9	22.64	ccRCC	pT1b	G2	N0M0	99256.2	8000	8000	8000	603538	11798.5	8000	53655.7	92339.2	8000	38601.6	295482	8000	8000	29490.4	33296.2	302350	162374	3218943	129766	1516251	16596	348970	21584.4	50902	220258	25432	18817.4	354668	1072937	8000	8000	219149	55700	15400	56645.1	2129548	7757459	43000	8000
TKCS_155	T	F	T	74.7726	UNK	ccRCC	pT3a	G2	N0M0	127070	21247.3	12959.7	19190.1	1157980	53130.9	8000	108466	66815.3	8000	38870.9	167812	8000	8383.33	20941.2	69456.4	383922	145207	1595032	14348.9	355543	8000	168671	8000	8000	17114.5	21221.7	8000	48972.2	117000	8000	8000	15400	8000	8000	8000	316321	662434	8000	8000
TKCS_018	T	F	PT	65.7	UNK	ccRCC	pT1b	G2	N0M0	70970.8	8000	8000	8000	572289	8000	8000	73547.2	49854.4	8000	24011.9	78859.3	8000	8000	9625.83	29731.5	201475	68273.2	1072511	57597.3	733057	8000	116702	92966.1	51524.5	149999	66387.6	41785.1	201409	292504	8000	8000	19157.4	81323.7	8000	8000	523254	800221	32216.3	8000
TKCS_019	T	M	PT	77.5	22.99	papRCC	pT2a	G2	N0M0	151573	159613	112745	180991	3922269	208594	72209.6	214031	94946.6	14250.3	188736	271736	13319.1	80131	63127.3	316057	1081433	339876	1954875	105330	703309	22103.6	393861	29129.4	37068.2	67205.3	8000	8000	83424.8	56009.1	8000	8000	8000	8000	8000	8000	498124	365062	8000	8000
TKCS_020	T	M	PT	65.7	28.38	ccRCC	pT3a	G2	N1M1	278155	220556	90022	302462	5384548	274599	98278.3	319446	179614	21027.2	339982	470179	34197.9	107409	104514	686846	1966701	578549	3300038	144762	601648	119975	493614	8000	56715.5	83892.5	8000	8000	96721.6	69243.2	8000	8000	8000	8000	8000	8000	470225	338776	8000	8000
TKCS_021	T	M	PMT	51.2	UNK	ccRCC	pT1a	G2	N0M0	140846	20292	8000	11487.1	916869	8000	8000	62396.2	59020	8000	30949.2	156342	8000	8000	13039.7	41901.8	385344	157052	1215877	108732	1208364	8000	108467	8000	17033	113352	8000	8000	118229	313439	8000	8000	24300	8000	8000	16000	474068	1164918	8000	8000
TKCS_022	T	M	PMT	81.2	23.88	ccRCC	pT1a	G1	N0M0	43420.8	12124.6	8000	8000	726608	8000	8000	62778.3	80907	8000	50630.3	188103	8000	8000	22060.1	64535.8	372181	204535	1916495	95916	801081	11375	268074	8456.21	8000	61845.5	47687.8	44257.3	121610	205000	8000	8000	8000	8000	8000	8000	479127	695656	8000	8000
TKCS_023	T	F	PMT	81	28.04	ccRCC	pT2b	G2-3	N0M1	533892	149916	124565	157532	3714892	135610	70801	411178	211627	26357.3	171592	452735	8000	51933	101293	209328	816852	391656	3765671	203656	1434878	8000	182123	98773.6	90325.9	203721	82925.9	89151.1	157588	279080	8000	8000	8000	27300	8000	8000	860183	1343282	8000	8000
TKCS_024	T	M	PMT	54.9	27.08	ccRCC	pT2a	G2	N0M0	232828	25703.4	12161	42495.3	1583964	104119	10119.8	222634	152267	8000	64724.1	269696	8000	12518.5	45087.9	110000	604375	193017	1801620	48281.1	595099	8000	121601	84432.9	77319.2	248616	40578	8000	187237	404624	8000	8000	27500	54500	8000	8000	385192	918441	8000	8000
TKCS_025	T	M	PMT	61.5	24.69	ccRCC	pT1b	G2	N0M0	125304	8000	8000	8000	674688	36866.8	8000	84370.5	42315.8	8000	8000	109019	8000	8000	8000	14135	188947	103239	1179651	12013.6	266874	8000	27754	8000	8000	43661.7	8000	8000	23661.7	67805.2	8000	8000	8000	8000	8000	8000	182577	449761	8000	8000
TKCS_026	T	M	PMT	64.7	21.33	ccRCC	pT1a	G2	N0M0	73636	9718.32	8000	8000	606984	12974.7	8000	62535.1	62566.1	8000	32895.1	161115	8000	8000	41651	32002.6	244101	129674	676031	8000	75001.5	8000	20731.6	9000	8000	8000	8000	8000	8000	27393.1	8000	8000	8000	38761.2	8000	8000	115661	251280	35143.6	8000
TKCS_028	T	M	PMT	54.9	22.64	ccRCC	pT1b	G2	N0M0	178635	163113	91277.6	154268	3139393	221729	41217.8	228578	125215	8000	134238	237138	8000	37883.1	43679.9	220304	741033	271653	1815693	327370	3284415	178387	1276233	50000	104572	331664	12559.4	17613.6	208802	462433	8000	8000	32889.2	8000	8000	25491.7	690777	1286703	8000	8000
TKCS_030	T	F	PMT	69.9	26.81	ccRCC	pT1a	G2	N0M0	73627.6	8000	8000	8000	567233	8000	8000	69270.9	71748.6	8000	27872.7	195907	8000	8000	25655.7	17529.4	244562	181540	496977	8000	95326.1	8000	20793.9	8000	8000	8000	8000	8000	23463.9	41661.7	8000	8000	8000	8000	8000	8000	144510	219347	8000	8000
TKCS_031	T	M	PMT	32.8	24.8	ccRCC	pT3a	G3	N0M0	160871	80045.1	23954.2	40917	1585406	48095.6	8000	62825.4	36256.4	8000	67454.2	133658	14704.5	16460	21585.2	102582	583573	165276	1463089	10394.8	273509	67549.1	931552	8000	8000	13311.2	8000	20600	9200	44475.4	8000	8000	8000	51586.2	8000	8000	110079	258513	8000	8000
TKCS_032	T	F	PMT	68.2	19.2	ccRCC	pT1b	G1-2	N0M0	80517.1	8000	8000	8000	717053	11526.7	8000	38209.3	27659.9	8000	8000	101168	8000	8000	8000	14338.9	220119	95064.1	925695	30844.9	846789	8000	118931	8000	8000	67139.3	8000	8000	44528.2	191546	8000	8000	8000	8000	8000	8000	228480	720061	8000	8000
TKCS_033	T	M	PMT	71.1	24.84	ccRCC	pT1b	G4 (sarcomatoid)	N0M0	112751	17304.6	18722	8000	1186024	10052.6	8000	116972	202906	8000	38798.3	353218	8000	8000	19277.3	18471	300568	173398	990907	143345	991972	13036.6	186687	8000	13646.8	113733	8000	8000	354282	668591	8000	8000	98931.9	8000	8000	15640.3	1395752	3287233	8000	8000
TKCS_034	T	M	PMT	48.1	27.77	ccRCC	pT3a	G2	N0M0	118100	8000	8000	8000	680739	8000	8000	38756.3	48697.9	8000	8000	109144	8000	8000	8000	16161.6	301365	98962.3	805137	8000	96207	8000	65527.2	8000	8000	8000	8000	8000	8000	42600	8000	8000	8000	8000	8000	8000	19720.2	140567	8000	8000
TKCS_036	T	M	PMT	75.1	24.91	papRCC	pT3a	G3	N0M0	77269.2	48522.5	23499.1	39601.4	1383395	55761.7	8000	58646.1	18828.2	8000	42318.8	66199.4	8000	8000	8000	132345	426191	108221	733278	29474.5	186659	121592	420246	8000	8000	10665.6	8000	8000	34781	25555.8	8000	8000	8000	8000	8000	8000	172141	97052.6	8000	8000
TKCS_037	T	F	PMT	59.7	31.64	ccRCC	pT3b	G3	N0M0	86179.3	14369	8000	8000	957068	36949	8000	99452.8	26151.3	8000	11346.9	97013.6	8000	8000	8000	39401.1	323081	131888	1176558	8000	225925	27049.5	396762	8000	8000	41085.2	8000	11448.1	20689.5	71290.9	8000	8000	8000	8000	8000	8000	170514	367520	8000	8000
TKCS_040	T	M	PMT	50.4	27.47	ccRCC	pT3a	G2-3	N0M0	85970	17240.4	10353.9	8000	755212	26410.4	8000	34518.8	18126.6	8000	50637.2	84538.8	8000	8000	11250.6	64867.9	324481	93129.4	1072376	10231.6	239418	8000	51772.8	154505	8000	8000	60594.2	91072.1	8000	17700	8000	8000	8000	8000	8000	8000	186534	215094	8000	8000
TKCS_041	T	F	PMT	72.6	31.25	ccRCC	pT1a	G2	N0M0	79306.7	83387.3	40099	41735.8	1785414	91588.9	8000	125102	67320.1	8000	77232.1	151794	8000	13177.5	15377	119060	566998	198364	849612	8000	139469	50167.2	566669	8000	8000	18633.6	8000	9329.06	30339.4	81448.7	8000	8000	8000	8000	8000	8000	207888	299134	8000	8000
TKCS_042	T	M	PMT	74.9	30.04	oncocytic adenoma	n.d.	n.d.	n.d.	128774	60201.9	28000	18528.2	2329377	135342	9958	360322	510659	11989.6	47919.2	547806	8000	8000	38364.9	31580.4	293997	256348	1140707	18678.8	734060	8000	133340	8000	8000	58608.3	18450.5	8000	207470	723522	8000	8000	38304.9	8000	8000	8000	528056	1981277	8000	8000
TKCS_043	T	M	PMT	50.2	33.21	ccRCC	pT3a	G2	N1M1	378303	39953.4	11422.7	24806.4	3057982	205442	8000	372652	183488	8000	30424.4	411024	8000	8000	50316	95248.1	648791	380341	4836926	11904.2	722645	8000	67845.8	8000	8000	29224	8000	8000	8000	113290	8000	8000	12868	8000	8000	8000	137902	1294517	8000	8000
TKCS_044	T	M	PMT	69.4	32.11	ccRCC	pT1a	G1	N0M0	52214	8000	8000	8000	505358	8000	8000	63330.7	74470.9	8000	13312.5	158539	8000	8000	15841.2	18591.3	254190	143242	1740173	54689.3	1176470	21526.1	414224	8000	44964.1	306298	8000	13158	249427	648460	8000	8000	40876.9	8000	8000	8000	643779	1943648	8000	8000
TKCS_045	T	M	PMT	80.9	23.66	ccRCC	pT3a	G3	N0M0	123560	11890.8	8000	8000	1587714	48199.6	8000	161824	90520.3	8000	10805.2	290957	8000	8000	16441.2	44778.2	346559	236374	2417359	69837.2	1257176	8000	44572.8	33500	35297	256182	90256.6	30000	64041	300376	8000	8000	22400	8000	8000	8000	448611	1984125	8000	8000
TKCS_046	T	F	PMT	67.1	UNK	ccRCC	pT3a	G3	N0M0	23099.2	8000	8000	8000	309556	8000	8000	8000	8000	8000	8000	49919.2	8000	8000	8000	14872.5	141154	74896.1	590572	134520	955061	8000	22442.7	8000	26488.1	63488.2	8000	8000	66927	101265	8000	8000	8000	8000	8000	8000	372510	423986	8000	8000
TKCS_047	T	M	PMT	44.7	35.65	ccRCC	pT1b	G1	N0M0	62492.6	14936.5	8000	8000	667643	8000	8000	53988.2	37451.5	8000	14481.4	145819	8000	8000	13758.9	17722	222140	119289	904812	8000	206166	8000	57436.7	25000	8000	8000	8000	8000	8000	59854.6	8000	8000	8000	8000	8000	8000	125935	501004	8000	8000
TKCS_048	T	F	PMT	64	29.74	ccRCC	pT3a	G3	N0M0	91892.7	15276.4	8000	14407.8	860436	10202	8000	64626.4	100724	8000	51156.9	220122	8000	9685.49	32696	48623.8	408847	283990	1152480	171933	957808	48568.7	363575	8000	28404.4	95841.8	11352	8000	286677	361763	8000	8000	27445	8000	8000	8000	1104668	1494900	8000	8000
TKCS_049	T	M	PMT	70.7	31.02	ccRCC	pT3a	G3	N0M0	30663.9	8000	8000	8000	200026	8000	8000	8000	8000	8000	8000	37503.6	8000	8000	8000	8000	127142	38515.8	583643	8635.02	321110	8000	386927	8000	8000	35223.2	16767.4	8000	92090.3	217136	8000	8000	46236.7	24530.7	8000	8000	488627	1114771	8000	8000
TKCS_050	T	F	PMT	78	27.48	ccRCC	pT1b	G2	N0M0	573790	373651	180513	456710	9611241	456514	275565	1396037	492813	71092.2	442582	812488	44957.6	146429	163988	666553	2275996	690377	6842045	58231.9	1181656	118530	1764935	35200	20037.4	221394	18534.6	67226.3	51560.1	232439	8000	8000	8000	8000	8000	30228.9	318790	737927	8000	8000
TKCS_051	T	M	PMT	59.2	24.78	ccRCC	pT3a	G4 (sarcomatoid)	NxM0	181076	23394.7	34344.4	11820.5	1620051	47532.2	8000	240021	226384	8000	60167.7	391302	8000	8000	28152.6	63007.2	411978	161228	1755306	67197	369828	114369	885414	8000	61644.4	168023	21114.8	85192.8	422719	633860	8000	8000	79214	8000	8000	17453.1	1585959	2919945	8000	8000
TKCS_052	T	M	PMT	77	24.76	ccRCC	pT3a	G3	N0M0	85861.9	8000	8000	8000	569479	9001.76	8000	69800.6	76960.3	8000	14753.5	178247	8000	8000	18088.8	18166.2	281896	151794	873303	11750	490526	8000	155088	8000	8000	122635	8000	8000	112127	420630	8000	8000	53211	8000	8000	8000	532042	2128359	8000	8000
TKCS_053	T	M	PMT	58.3	23.67	ccRCC	pT1a	G3	N0M0	135692	8206.66	8000	9673.44	855976	14979.3	8000	82110.4	103228	8000	44541.2	264275	8000	8000	18272.8	53679.2	351591	186180	1345630	10860.3	201403	8000	152970	8000	9450.66	51981.7	8000	8000	145125	258980	8000	12000	8000	8000	8000	8000	665703	1309742	8000	8000
TKCS_055	T	M	PMT	40.5	27.45	ccRCC	pT1b	G1	N0M0	109006	17456.9	8000	11938.9	935285	8000	8000	61116	75118.2	8000	38488.4	161849	8000	8000	8000	38606	367768	145011	1554813	8000	242651	8000	20487.5	8000	8000	8000	8000	8000	25851.3	91000	8000	8000	8000	8000	8000	8000	188340	436979	8000	8000
TKCS_056	T	F	PMT	44.4	21.45	ccRCC	pT1b	G1	N0M0	32584.7	8000	8000	8000	163995	8000	8000	8000	101591	21820.3	8000	246937	8000	8000	143409	8000	155158	263806	709546	50256	8914467	8000	36808.4	64230.3	16363.8	615175	88805.9	18000	292214	11390289	75342.8	8000	2524810	794319	386135	19580.8	1115110	35229021	664208	8000
TKCS_057	T	M	PMT	77.2	31.14	ccRCC	pT1b	G2	N0M0	83380.4	12656	8000	8789.11	791728	8000	8000	64214.7	71247.4	8000	22616.9	129174	8000	8000	12172.1	27041.6	247140	101879	1402793	344637	3532925	37889.3	317300	17300	88690.9	300630	8000	8000	445875	1085362	8000	8000	97025.4	60076	8000	34049	1410386	3572741	8000	8000
TKCS_058	T	M	PMT	64.1	29.07	ccRCC	pT2b	G3	N0M0	83985.6	8000	8000	21244.7	934598	8000	8000	62745	126517	8000	87559.6	326824	8000	8000	12367.2	77148.9	390225	425242	910213	138629	801264	8000	8126.28	56144.4	15057.3	66985.9	107098	71905.6	233555	227932	8000	8000	8000	8000	8000	8000	1310771	1391291	8000	8000
TKCS_059	T	F	PMT	66.6	30.12	chRCC	pT2a	Gx	N0M0	203686	37983.7	8000	9667.47	1545180	144956	8000	268539	1797561	222876	62567.2	1533935	8000	8000	223264	70953.3	399781	451674	1275652	8000	703228	8000	27263.9	60897.2	8000	115104	138902	67606.2	145428	2544357	8000	8000	286759	60543.3	136297	8000	191878	2921949	8000	8000
TKCS_060	T	F	PMT	79.9	24.34	ccRCC	pT3a	G4	N0M0	183258	190464	62274.1	236465	3086151	116707	20123.8	98709.4	38125.5	8000	217860	142685	8000	34783.2	11009.4	413967	1196596	239820	1211415	8000	93857.9	22464.1	90831	60085.3	8000	8000	52034	45080	8000	8000	8000	8000	8000	8000	8000	8000	8000	8000	8000	8000
TKCS_061	T	M	PMT	62.7	23.41	ccRCC	pT3a	G3	NxM1	360311	359677	168996	308477	5036185	250808	173817	628425	369752	85873.1	479420	662299	55689	182486	185453	524352	1629701	442702	3083633	100677	1444490	265474	3350807	30000	37838.1	148405	20222.8	97745.3	267107	395471	57657.7	55370.6	100842	156795	8000	170026	708320	651391	56852.5	8000
TKCS_062	T	M	PMT	67.9	33.9	chRCC	pT2a	Gx	N0M0	46202.4	8000	8000	8000	201071	19919.7	8000	122743	658363	96146.7	8000	381060	54581.5	8000	58598.8	95700	57891.8	99828	784941	8000	199964	8000	57200	8000	8000	115558	163736	82863	177763	1454907	8000	8000	149084	109151	686687	8000	135027	911821	8000	8000
TKCS_063	T	M	PMT	53.2	30.74	eosinophilic granular cell subform + ccRCC residuum	pT1b	G3	N0M0	148457	73512.2	18912.8	31977.3	1797385	104441	8000	127160	54298.3	8000	120257	168167	8000	13684.4	18323.5	122262	816543	229785	1662685	8000	107932	8000	30926.3	32000	8000	8000	8000	15000	8000	8000	8000	8000	8000	8000	8000	8000	9990.98	34938.3	8000	8000
TKCS_064	T	M	PMT	68.1	25.35	ccRCC	pT3a	G4 (sarcomatoid)	NxM1	385917	754475	284956	372665	6906603	559286	115966	501541	236072	55808.2	460977	650906	72344.2	135291	140884	388206	1405537	727034	5094371	18567.4	272328	59111.5	426743	29500	8000	8000	8000	8000	8000	8000	8000	8000	8000	8000	8000	8000	29288	82473.5	8000	8000
TKCS_065	T	M	PMT	47.3	30.09	ccRCC	pT2a	G3	N0M0	826995	81790.3	21815.5	75677	1923088	89785	29540.4	198227	107232	8000	113516	277322	8000	26834.2	67534.5	133400	700782	275402	5136966	8841.64	396693	8000	54676.1	8000	8000	38165.3	10945.2	8000	32049.5	80676	8000	8000	8000	8000	8000	8000	189510	395384	8000	8000
TKCS_066	T	M	PMT	64.1	22.09	ccRCC	pT3a	G4	N0M1	98566.4	90331.3	28576.5	25284.6	1562284	140021	8000	139065	66504.2	8000	56406.6	123525	8000	8000	11011.6	91415.4	478094	130601	586563	8000	365818	8000	282185	72979.4	8000	102706	101064	68186.8	23019.4	155488	8000	8000	8000	8000	8000	8000	100869	428414	8000	8000
TKCS_067	T	M	PMT	58.6	17.87	ccRCC	pT3a	G1-2	N0M0	80043.8	32097	8000	26018.1	781895	11541.8	8000	80689.8	83588.6	8000	82916.1	131654	8000	10983.4	8000	133378	511838	169372	692251	29765.4	437308	43178.9	340734	8000	25743.7	104370	26846.9	8000	173125	277576	8000	8000	8000	8000	8000	8000	554483	714248	8000	8000
TKCS_068	T	F	PMT	58.6	23.8	ccRCC	pT1a	G1	N0M0	166285	58678.2	19956.8	8705.15	1044733	43156.6	8000	118827	95257.4	8000	68509.8	201014	8000	11235	34054.9	60218.7	424521	235019	736878	8000	119410	8000	158092	8000	8000	8000	8000	8000	9347.47	67974.9	8000	8000	8000	8000	8000	8000	99676.4	322107	8000	8000
TKCS_069	T	M	PMT	59.9	24.54	ccRCC	pT3a	G2	N0M0	127239	26588.5	8000	8000	1209846	45084.9	8000	101731	71433.4	8000	32341.8	179528	8000	8000	8000	48688.6	396242	166929	606203	8000	302128	8000	53110.3	8000	8000	8000	8000	8000	8000	60143.5	8000	8000	8000	8000	8000	8000	77945.2	408656	8000	8000
TKCS_072	T	F	PMT	57.1	24.03	chRCC	pT2b	G3-4	N0M0	75545.3	26969.7	8000	8000	596981	21527.9	8000	136582	594064	44762.3	70551.9	487614	8000	8000	40131.6	15867.3	135846	110698	997924	8000	8000	8000	12578.5	20599.5	8000	8000	82001.8	21360.1	8000	29800	8000	8000	8000	8000	8000	8000	8000	43700	8000	8000
TKCS_073	T	M	PMT	69	29.64	papRCC	pT2a	Gx	N0M0	21786.3	8000	8000	8000	196615	8000	8000	8000	15419.4	8000	36940.4	59426.2	8000	8000	8000	18720	123461	56490.5	487611	8000	8000	8000	29914.9	107300	8000	8000	150808	63888.8	8000	8000	8000	8000	8000	8000	8000	8000	14400	8000	8000	8000
TKCS_074	T	M	PMT	71.9	21.72	ccRCC	pT3a	G3	N1M0	127087	97048.8	26313.7	11000	2303721	152129	8000	112307	27694.6	8000	134641	112045	8000	8000	8000	102183	693348	142799	1072292	8000	16189.6	8000	8000	67577.1	8000	8000	89343.4	40085.1	8000	8000	8000	8000	8000	8000	8000	8000	8000	8000	8000	8000
TKCS_075	T	M	PMT	75.7	26.23	ccRCC	pT2a	G3	N0M0	66909.1	8000	8000	8000	529695	8000	8000	29100	98635.9	8000	36913.8	308779	8000	8000	36362.1	8390.71	228149	260042	680946	10457.4	209567	8000	8000	8000	8000	8000	17901.1	8000	16395.7	103610	8000	8000	8000	8000	8000	8000	246232	876442	8000	8000
TKCS_076	T	M	PMT	61.1	27.64	ccRCC	pT3a	G3	N0M0	33970.5	8000	8000	8000	416857	8000	8000	50235.8	82090.8	8000	22988.3	182526	8000	8000	38535.6	9947.45	226971	194670	292960	10598.4	397624	8000	8000	16334.7	8000	49925.5	16176.6	8000	60962.9	216690	8000	8000	8000	8000	8000	8000	273376	957551	8000	8000
TKCS_077	T	M	PMT	69.9	25.15	ccRCC	pT1b	G2	N0M0	106458	21658.7	8000	8000	1014587	41171.5	8000	112009	71857.5	8000	31252.1	167455	8000	8000	8000	83628.4	404433	140412	1029564	8000	336387	8000	261597	23420.4	8000	58978.6	94340.5	16758.1	68447.6	261129	8000	8000	10440.8	10908.1	8000	8000	274616	866905	8000	8000
TKCS_144	T	M	MT	50.1	33.77	ccRCC	pT3a	G2	N0M0	124293	22410.7	8000	17602.7	954188	13000	8000	46852.6	58180.8	8000	47139.8	196200	8000	8000	9808.09	40970.4	412275	216663	889014	62661.2	795212	8000	222336	26673.2	8000	30730.7	30394.5	39182.6	73929.9	175099	8000	8000	8000	8000	8000	8000	514645	1146749	8000	8000
TKCS_078	T	M	PMT	55.3	28.53	ccRCC	pT3a	G4 (sarcomatoid)	N2M0	547977	298352	110200	214810	5729781	472262	63692.8	300177	161040	30200	219185	388995	11830	63999.7	76395.6	330157	1044511	586337	3885355	21798.7	472261	17355	217486	8000	8000	8000	8000	8000	8000	8000	8000	8000	8000	8000	8000	8000	16533.6	78328.8	8000	8000
	number of cells with min (all)									0	27	50	40	0	27	82	6	3	76	11	0	142	64	19	5	0	0	0	33	4	127	6	99	98	22	55	61	19	10	151	129	59	64	123	142	6	5	119	143
	%cells with min in total									0	17.5325	32.4675	25.974	0	17.5325	53.2468	3.8961	1.94805	49.3506	7.14286	0	92.2078	41.5584	12.3377	3.24675	0	0	0	21.4286	2.5974	82.4675	3.8961	64.2857	63.6364	14.2857	35.7143	39.6104	12.3377	6.49351	98.0519	83.7662	38.3117	41.5584	79.8701	92.2078	3.8961	3.24675	77.2727	92.8571
	number of cells with min (N)									0	2	5	3	0	2	19	0	0	13	1	0	75	9	1	0	0	0	0	11	0	74	1	53	48	1	14	13	2	0	76	55	14	4	50	76	0	0	47	66
	number of cells with min (T)									0	25	45	37	0	25	63	6	3	63	10	0	67	55	18	5	0	0	0	22	4	53	5	46	50	21	41	48	17	10	75	74	45	60	73	66	6	5	72	77
	% cells with min in N									0	2.5974	6.49351	3.8961	0	2.5974	24.6753	0	0	16.8831	1.2987	0	97.4026	11.6883	1.2987	0	0	0	0	14.2857	0	96.1039	1.2987	68.8312	62.3377	1.2987	18.1818	16.8831	2.5974	0	98.7013	71.4286	18.1818	5.19481	64.9351	98.7013	0	0	61.039	85.7143
	% cells with min in T									0	32.4675	58.4416	48.0519	0	32.4675	81.8182	7.79221	3.8961	81.8182	12.987	0	87.013	71.4286	23.3766	6.49351	0	0	0	28.5714	5.19481	68.8312	6.49351	59.7403	64.9351	27.2727	53.2468	62.3377	22.0779	12.987	97.4026	96.1039	58.4416	77.9221	94.8052	85.7143	7.79221	6.49351	93.5065	100
[truncated: 75 more columns]

## Sheet: Data 1D
Data S1D. Clinical data together with relative concentrations [% for classes - SM, SHexCer] of individual lipids measured in plasma samples. Explanation of abbreviations is as follows: N - controls, T - RCC patients, UNK - unknown, QC - quality control, M - males, F - females, ccRCC - clear cell renal cell carcinoma, papRCC - papillary renal cell carcinoma, chRCC - chromosome renal cell carcinoma…
Sample code	State	gender	Measured types of samples (P = plasma, U = urine, T= tissue)	Age	BMI	Type of tumor	Tumor stage	Tumor grade	NM code	SM 32:1;O2	SM 33:1;O2	SM 34:2;O2	SM 34:1;O2	SM 34:0;O2	SM 35:1;O2	SM 36:2;O2	SM 36:1;O2	SM 36:0;O2	SM 37:1;O2	SM 38:2;O2	SM 38:1;O2	SM 39:1;O2	SM 40:2;O2	SM 40:1;O2	SM 41:2;O2	SM 41:1;O2	SM 42:3;O2	SM 42:2;O2	SM 42:1;O2	SM 43:2;O2	SHexCer 34:1;O2	SHexCer 34:1;O3	SHexCer 40:1;O2	SHexCer 40:2;O3	SHexCer 40:1;O3	SHexCer 42:3;O2	SHexCer 42:2;O2	SHexCer 42:1;O2	SHexCer 41:1;O3	SHexCer 42:3;O3	SHexCer 42:2;O3	SHexCer 42:1;O3
NCS_001	N	M	PU	50.3	UNK	-	N	N	-	1.82855	1.18148	1.96826	37.5698	1.6216	1.40191	1.25171	5.92783	0.260615	0.67392	0.999364	3.71581	0.949903	3.25535	8.54579	1.62238	3.2913	3.59476	13.972	5.92389	0.443692	16.0394	29.2037	2.92917	1.73456	8.34418	1.51255	5.76119	2.35965	5.7814	1.36513	14.344	10.625
NCS_002	N	F	PU	61.3	UNK	-	N	N	-	2.33632	1.42528	3.00348	33.2083	1.28143	1.33412	2.09257	6.6842	0.328855	0.813268	1.48033	4.26415	1.53418	4.79198	7.62756	2.29202	3.31915	5.27249	11.8947	4.59634	0.419255	19.247	30.0059	4.24541	1.63431	7.5683	1.50012	5.0235	2.96439	5.46715	1.55597	11.5926	9.1953
NCS_003	N	F	PU	48.8	UNK	-	N	N	-	2.73865	1.71291	2.82625	33.9954	1.37151	1.44216	1.93497	6.22856	0.120936	0.796663	1.24412	4.29666	1.49527	4.45259	8.17401	2.40111	3.8396	4.49637	11.014	4.88115	0.537093	21.9632	27.0157	5.03145	0.894836	7.94843	1.34765	4.46085	4.4198	6.39213	0.670191	9.61765	10.2382
NCS_004	N	F	PU	47.6	UNK	-	N	N	-	1.99863	1.5717	2.79181	34.9034	1.43341	1.03458	1.9259	5.95086	0.164452	0.677108	1.28936	4.08271	1.37723	4.65511	7.9664	2.43041	3.48404	4.4972	12.3247	5.00252	0.43843	21.1553	28.3765	4.38154	1.86183	6.1448	2.59814	7.31201	3.38425	4.51476	1.33638	10.8006	8.13388
NCS_005	N	F	PU	56.9	UNK	-	N	N	-	2.18324	1.46635	3.31965	33.5533	1.23736	1.21939	1.93903	6.05607	0.234286	0.731633	1.24937	3.88051	1.21252	4.35397	7.5213	2.1415	3.1905	5.0076	14.2485	4.80878	0.445204	18.4655	25.7781	3.81084	2.33252	6.94322	1.32525	6.1117	2.86907	5.50561	2.51727	15.1463	9.19451
NCS_006	N	F	PU	59.9	25.39	-	N	N	-	1.6457	0.979599	2.82828	33.9174	1.27886	1.28403	1.90364	6.4539	0.302745	0.746526	1.31389	4.11541	1.2716	4.20473	7.72827	2.04354	3.39143	4.91842	14.5485	4.63672	0.486832	15.1324	33.0273	2.67366	1.5203	7.48281	0.971401	4.56569	1.7706	5.45698	2.16874	15.5634	9.66668
NCS_007	N	F	PU	42.5	UNK	-	N	N	-	2.03004	1.36454	2.41015	31.8992	1.55191	1.01177	1.67161	5.46224	0.182337	0.653564	1.51451	4.2482	1.45948	4.66144	7.81403	2.51486	3.65412	5.45401	14.9267	4.91006	0.605228	12.2571	33.3117	2.20642	2.33063	6.6841	2.52847	6.89973	2.75933	5.58269	1.6299	14.779	9.03098
NCS_008	N	F	PU	53.4	UNK	-	N	N	-	1.78911	1.24618	2.69096	32.5081	1.0893	1.12598	1.74929	5.02034	0.225228	0.575052	1.39139	3.84932	1.22323	4.93818	7.50564	2.43173	2.92788	6.0467	16.0093	5.01287	0.644237	14.5985	31.9473	2.74041	2.65282	7.1716	3.00791	6.21342	2.26638	5.00128	2.36584	13.5359	8.49864
NCS_009	N	F	PU	58	UNK	-	N	N	-	1.94736	1.28507	3.30963	30.6959	1.02938	1.44559	2.81245	6.4436	0.201622	0.89779	1.84123	3.71428	1.06334	4.95128	5.78501	2.46935	2.60033	6.95735	15.6084	3.87359	1.06741	27.3804	29.6535	3.51708	1.10446	3.63382	2.42433	8.13654	3.04557	2.03621	1.10446	11.8307	6.13287
NCS_010	N	F	PU	68.3	UNK	-	N	N	-	2.80425	1.60333	1.95416	44.4364	1.53764	1.67237	0.105346	6.04695	0.105346	0.604422	0.718986	3.46654	1.12293	3.0217	6.51544	1.57325	3.20007	3.80948	10.8172	4.60465	0.279524	21.1035	41.0968	1.1303	0.591966	4.6657	1.1942	5.19373	2.27303	3.57698	0.727694	10.0512	8.39489
NCS_011	N	M	PU	53.6	27.5	-	N	N	-	3.2443	1.29137	1.22857	36.6723	1.49381	1.49347	1.13238	9.12181	0.359552	1.12992	0.805685	6.01174	1.95401	2.55935	10.1577	0.97535	4.48615	2.25038	6.92857	6.50709	0.196509	14.9723	41.721	1.2873	1.07601	9.89712	1.07601	1.30271	1.07601	5.51406	1.07601	9.05413	11.9474
NCS_012	N	F	PU	39.4	28	-	N	N	-	2.51639	1.18293	2.2947	35.3328	1.35238	1.10048	1.53325	7.39648	0.278068	0.82845	0.925603	4.51107	1.11078	4.07327	9.51753	1.42432	3.36447	4.71761	10.1719	6.22621	0.141313	18.1866	34.6191	3.30231	0.79154	8.72677	1.23437	4.13213	2.05284	4.58919	0.882032	11.6	9.88311
NCS_013	N	M	PU	33.4	29.63	-	N	N	-	2.0524	1.32814	1.79322	39.9372	1.6612	1.41129	1.08078	6.15314	0.143541	0.895021	0.892609	4.53631	1.27953	3.10986	9.26272	1.31258	3.35922	3.36875	9.71119	6.55125	0.160019	16.1072	31.0862	4.02414	1.5491	8.83705	1.3238	4.47267	3.25348	5.70745	1.08279	11.2114	11.3447
NCS_014	N	M	PU	54.6	26.79	-	N	N	-	2.63582	1.57437	0.913235	40.7575	2.02104	1.50441	0.673026	7.35269	0.315427	0.88813	0.494872	5.67462	1.8125	2.26749	10.4374	1.09459	4.3077	2.01017	6.85231	6.27244	0.140244	14.7355	37.1969	2.53339	0.61878	10.3265	0.61878	1.71911	1.27757	7.20686	0.61878	11.7813	11.3665
NCS_015	N	F	PU	54.8	26.5	-	N	N	-	2.84207	1.67964	1.8526	35.2743	1.50193	1.53532	1.53532	7.43242	0.301634	0.947726	0.947726	4.59077	1.92028	3.73949	9.66559	1.77703	4.26928	3.22303	8.85706	5.74459	0.362176	19.6069	30.3768	3.99858	0.808153	8.79636	1.44035	5.25081	3.39378	7.61044	0.530392	8.01377	10.1736
NCS_016	N	M	PU	48.9	30.42	-	N	N	-	2.111	1.12765	2.21779	32.4211	1.26495	1.2121	1.64617	6.84115	0.479347	0.786229	1.23667	4.60146	1.43687	4.44431	9.16341	1.79293	3.46003	4.45984	12.6309	6.13486	0.531253	17.4774	35.4709	3.01967	0.857256	8.35287	0.853903	4.53773	2.55786	4.55164	0.71239	11.6515	9.95681
NCS_017	N	F	PU	47.1	38	-	N	N	-	2.40264	1.32394	2.81042	31.2824	1.31303	1.30278	2.18609	7.44046	0.505728	0.850282	1.37226	4.35205	1.36946	4.32903	8.57008	2.0427	3.60548	4.36117	12.5849	5.42419	0.570889	16.5594	32.8892	3.06784	2.21904	7.69523	0.95078	4.14511	1.86558	5.75356	2.08842	12.9786	9.78723
NCS_018	N	M	PU	60.6	29.06	-	N	N	-	2.14661	1.32135	2.57046	30.8519	1.12173	1.34017	2.23012	7.22644	0.293162	0.833416	1.67521	5.00431	1.72671	5.12495	8.21329	2.41205	3.58235	4.5824	12.4238	4.73209	0.587525	15.2663	29.1247	2.85837	1.94403	9.45036	0.668961	4.20848	2.36968	6.39355	1.27703	15.4379	11.0007
NCS_019	N	F	PU	52.7	28	-	N	N	-	3.19346	1.84992	2.25145	30.6749	1.24246	1.90812	1.41473	5.65122	0.278304	1.09251	1.36438	4.80116	2.06379	5.31809	7.393	2.70423	3.61221	4.73869	12.9326	4.56073	0.954027	16.4661	32.3628	3.39391	2.47731	7.76053	1.97629	5.2474	2.59638	6.24076	1.61731	10.951	8.91023
NCS_020	N	F	PU	57.3	22.1	-	N	N	-	2.57866	1.66035	2.64473	35.2952	1.38503	1.31002	1.61117	4.938	0.124979	0.700184	1.14439	3.40357	1.49551	4.67469	7.29211	2.50269	3.58233	5.20548	12.8641	4.80119	0.785636	19.847	31.1237	3.52094	1.79158	7.57358	1.96385	5.21731	2.87814	6.30587	1.2618	10.3854	8.13076
NCS_021	N	F	PU	55.3	27.4	-	N	N	-	3.05452	1.95959	3.07966	34.3275	1.09861	1.47031	2.18541	6.13147	0.17109	0.848769	1.54382	4.25934	1.64524	5.06038	7.17394	2.50147	3.23841	4.56698	10.9733	4.1089	0.601291	20.3952	26.9095	3.88912	3.0731	8.15544	1.85564	4.96834	2.67212	6.82193	1.92411	10.3467	8.98881
NCS_022	N	M	PU	38.6	28.98	-	N	N	-	2.75787	1.42928	2.31562	31.9132	1.1525	1.22588	1.44221	5.66986	0.214018	0.757161	1.00955	4.93445	1.76364	4.959	8.51006	2.11692	3.49672	3.86858	14.2587	5.48807	0.71666	16.6446	28.5111	3.39095	1.58584	8.83889	0.846906	5.14824	2.64138	6.90362	1.17287	13.761	10.5546
NCS_023	N	M	PU	58.5	35.19	-	N	N	-	2.16363	1.35603	2.66356	36.8866	1.30042	1.11683	1.64933	6.48083	0.123144	0.670585	1.26801	4.97944	1.31007	3.88691	7.06162	1.89106	3.01305	3.52822	13.3328	4.6824	0.635528	21.6237	32.0136	2.76882	1.87326	6.33909	0.608358	4.05955	1.55379	4.58844	2.53571	14.0852	7.95046
NCS_024	N	F	PU	34.2	24	-	N	N	-	2.6436	1.7883	2.70888	35.6394	1.41321	1.37053	2.02435	6.61859	0.296498	0.865958	1.2137	4.3213	1.67471	4.19533	7.73684	2.25298	3.73903	3.66665	10.7115	4.53419	0.584423	16.5235	33.2697	3.75152	1.39244	9.32581	0.953922	4.39225	2.54909	7.57913	0.796107	9.64866	9.8179
NCS_025	N	F	PU	53.7	31.64	-	N	N	-	1.67203	1.05137	3.22663	33.051	1.50373	1.05899	2.15633	5.77997	0.365184	0.783842	1.44666	3.65983	0.94897	4.0714	7.62778	1.90357	3.04455	5.34997	15.5732	5.15184	0.573178	15.7256	28.6908	2.79521	1.28503	9.50685	0.970682	4.91051	1.37035	6.47086	0.685348	16.537	11.0518
NCS_026	N	F	PU	54.5	38.2	-	N	N	-	1.66761	1.38362	2.51875	35.5694	1.23864	1.46237	1.82602	5.97118	0.15111	0.851112	1.36952	3.51767	1.19409	3.95126	7.25662	2.13793	3.14616	4.95059	14.3057	4.73121	0.799467	16.8092	33.3084	3.59456	1.33353	7.44144	1.9396	5.31523	2.60051	5.75954	1.21232	12.1146	8.5711
NCS_027	N	F	PU	37.3	26.23	-	N	N	-	2.07544	1.42987	2.93684	32.6514	1.0858	1.18449	1.97414	6.17142	0.313189	0.839908	1.64392	4.75261	1.39303	5.17694	7.79785	2.1926	2.94794	5.10741	13.4924	4.30053	0.532266	13.2844	34.1561	2.12098	3.12012	9.46812	1.13054	5.64537	1.52489	5.96762	1.65687	13.4929	8.43211
NCS_028	N	M	PU	52	UNK	-	N	N	-	1.78704	1.2499	2.43457	34.2	1.03147	1.21673	1.76796	6.57293	0.327182	0.761438	1.33448	4.07434	1.27215	4.43778	7.46092	1.98334	3.06975	4.45299	15.0334	4.83198	0.69963	14.0396	25.4528	3.20216	2.32191	9.43783	1.04063	5.58663	2.77998	6.86976	2.36835	16.8173	10.083
NCS_029	N	F	PU	59.1	UNK	-	N	N	-	1.9839	1.09516	2.43021	35.0609	1.6186	1.19769	1.71965	6.11027	0.290166	0.645897	1.16347	3.71686	1.00068	3.85328	7.35291	1.70043	2.9441	4.54316	15.498	5.46108	0.613533	17.531	28.8016	3.57409	1.17479	7.38188	1.73356	6.48381	3.59594	5.83137	1.14429	13.153	9.59466
NCS_030	N	F	PU	56.2	29.41	-	N	N	-	2.54405	1.49798	3.03598	34.372	1.14907	1.23471	1.98469	6.26622	0.182921	0.951188	1.47251	4.27798	1.56934	4.51337	8.28901	2.16774	3.54465	4.0276	12	4.41783	0.501151	11.7597	31.6155	2.85252	3.03459	9.15114	0.708226	3.09185	1.42536	7.28488	2.87429	15.8233	10.3787
NCS_031	N	M	PU	58.7	25.9	-	N	N	-	2.44659	1.62133	2.81224	36.8777	1.25091	1.18284	1.58455	5.58652	0.111721	0.695579	1.19166	3.90379	1.37454	4.30413	7.47582	2.0192	3.13067	4.35078	12.3035	5.20828	0.567717	25.9542	26.9657	3.63687	1.10463	5.43581	1.52492	7.29115	3.60666	2.16508	1.10463	10.3936	10.8167
NCS_032	N	M	PU	46.6	32.6	-	N	N	-	2.14153	1.34213	2.63027	33.2115	1.20379	1.22791	1.80608	6.14431	0.3041	0.809176	1.27318	4.02668	1.39868	4.59776	7.76138	2.21087	3.55424	4.50169	13.8388	5.22115	0.794811	17.6014	27.0425	4.18129	1.74758	8.98861	1.84135	6.1699	2.89128	8.01413	1.13357	11.6127	8.77573
NCS_033	N	M	PU	43.5	23	-	N	N	-	2.10108	1.53203	2.71048	34.3284	1.07376	1.35261	1.98233	6.2746	0.211237	0.696448	1.3008	4.11544	1.37853	4.5299	7.29766	2.2153	3.33606	4.63786	13.2897	4.91372	0.722103	15.5474	29.9537	3.61118	2.96137	8.34105	2.79759	6.50631	2.73917	5.91846	2.08313	10.8505	8.69022
NCS_034	N	F	PU	45.5	23.3	-	N	N	-	2.29426	1.34561	2.96863	35.0085	1.2009	1.31111	1.7401	5.40135	0.272214	0.75525	1.17819	3.16741	1.24141	4.55742	6.94238	2.19754	3.15831	5.19956	14.4873	4.74844	0.824108	16.7955	32.8148	2.82538	1.38511	6.67557	2.10139	6.42335	2.04313	5.96257	1.36722	12.9193	8.68666
NCS_035	N	F	PU	38.4	29	-	N	N	-	2.31576	1.73934	2.83754	29.0142	1.1588	1.42117	2.19097	6.48657	0.201333	1.00666	1.82384	5.10095	1.93308	5.42414	7.80884	2.75751	3.67711	4.86266	12.7694	4.55657	0.913502	15.445	27.0158	3.55793	2.357	8.13803	3.01314	6.78266	2.73655	6.68798	1.70996	13.1392	9.41675
NCS_036	N	F	PU	29.5	22	-	N	N	-	2.22527	1.57534	2.29708	31.9193	1.34993	1.52901	1.88833	6.479	0.212789	1.0015	1.75836	4.46362	1.78423	4.73941	7.67282	2.64963	3.78529	4.5795	12.7781	4.59593	0.715489	13.2613	29.926	2.38564	1.66043	8.93457	2.63998	8.21514	2.11663	7.93998	0.915365	11.1399	10.865
NCS_037	N	M	PU	43.6	29.8	-	N	N	-	2.08036	1.19472	2.53468	29.3201	1.24847	1.3145	2.09461	6.57789	0.496285	0.982807	1.53564	4.58673	1.5563	4.72871	9.53547	2.18179	3.95802	4.13726	13.3635	5.94206	0.630072	17.2432	27.6255	4.95243	2.25675	9.17375	1.59431	5.71475	3.00146	5.77562	1.26175	11.2957	10.1048
NCS_038	N	M	PU	54.9	24.49	-	N	N	-	1.85871	1.16579	2.9906	33.6672	1.23507	1.3339	2.16716	5.70621	0.42246	0.733134	1.507	3.44865	1.02854	4.67065	6.99951	2.12069	2.7151	5.55903	15.2947	4.64657	0.729334	19.7416	32.9062	3.39821	1.87734	6.70116	2.48047	5.11566	2.4102	4.49477	2.0069	11.0063	7.86112
NCS_039	N	M	PU	55.6	27.43	-	N	N	-	1.52756	1.07789	2.365	29.3774	1.15983	1.27857	2.12514	6.70845	0.529295	0.857772	1.35139	4.4312	1.25303	4.53863	9.4042	2.08981	3.4978	4.63394	15.0537	5.94924	0.790164	14.0372	29.9601	3.33627	1.83327	9.75655	1.08614	4.55652	1.93958	5.76766	1.65023	15.1367	10.9398
NCS_040	N	F	PU	46	24.45	-	N	N	-	2.49297	1.26645	3.16131	30.2778	1.29513	1.05511	1.8303	5.58735	0.297497	0.711662	1.27044	4.20184	1.1943	4.7756	7.72749	2.37017	3.52742	5.03272	15.7246	5.56889	0.630948	15.1848	37.0855	2.49079	1.4222	7.26084	1.35634	5.66879	2.0816	5.88933	0.847852	11.6834	9.02856
NCS_041	N	F	PU	45.1	24.5	-	N	N	-	2.41412	1.75139	3.13298	33.0124	1.41645	1.41141	2.09606	5.29095	0.0947965	0.842636	1.65367	3.9429	1.43756	5.10708	6.9474	2.58969	3.04821	5.50145	13.3521	4.24949	0.707274	17.1347	34.6385	3.32326	2.09417	6.47533	1.94236	5.77853	2.7463	5.42044	1.43134	10.6383	8.37676
NCS_042	N	M	PU	43.9	25.66	-	N	N	-	2.19327	1.42869	2.7364	32.7927	1.12488	1.18843	1.79446	5.29385	0.135371	0.772088	1.41668	4.3259	1.38302	4.94152	7.84797	2.22407	3.26764	5.0818	14.225	5.194	0.632229	14.9439	31.1879	2.70151	2.23997	8.34468	1.49841	5.63072	2.01963	5.51017	2.15226	14.3466	9.42431
NCS_043	N	M	PU	59.1	21.7	-	N	N	-	1.60185	1.41746	2.92308	38.4418	1.29499	1.2762	0.19745	5.69547	0.131634	0.659773	1.50094	3.64846	1.07023	4.21752	6.69444	2.11188	2.80809	5.41832	14.0875	4.1414	0.661462	15.2195	28.6487	3.70897	2.16412	8.81591	2.68451	6.69797	2.75824	6.49972	1.3884	11.857	9.55694
NCS_044	N	M	PU	43.6	27.2	-	N	N	-	1.74652	0.730362	3.49464	31.4402	1.19926	0.989717	2.37031	5.64648	0.336714	0.691706	1.73425	3.48135	0.758859	4.77161	7.42909	1.70906	2.40484	6.28271	16.9844	5.37598	0.421979	17.3927	29.1947	2.63846	1.24383	8.00023	1.09681	6.17976	2.57408	4.99629	1.09763	14.3578	11.2276
NCS_045	N	F	PU	54.2	33.1	-	N	N	-	2.14698	1.18417	3.38234	37.0181	1.64531	1.07876	2.01404	5.32218	0.322915	0.618076	1.29097	3.43516	0.927098	4.39852	7.60945	1.76665	2.63515	4.52947	13.6679	4.58174	0.425	16.9282	36.4399	3.96121	1.71583	7.77671	0.835455	3.74587	2.62177	3.99015	1.43954	11.9063	8.639
NCS_046	N	M	PU	59.2	UNK	-	N	N	-	2.0582	0.619536	3.34416	31.3735	1.62166	0.994338	1.83645	5.48137	0.548692	0.573611	1.2444	3.49403	0.812081	4.41885	8.05215	1.51579	3.02916	5.13843	17.1356	6.32348	0.38456	17.6388	29.8067	4.11692	1.35524	8.07537	0.582901	4.4177	2.86952	4.24836	0.872369	15.3779	10.6383
NCS_047	N	M	PU	45	23.55	-	N	N	-	1.77066	1.10406	3.0656	36.5261	1.40415	0.923499	1.70739	4.69487	0.0612949	0.566837	1.48397	3.37039	0.930056	4.53072	7.12835	1.96474	2.78834	5.57282	15.0385	4.91728	0.450367	15.8876	29.9094	3.5339	1.27144	7.86633	2.00611	6.68764	2.82202	5.83491	1.54733	12.6662	9.96704
NCS_048	N	M	PU	53.2	24.11	-	N	N	-	2.1141	1.44578	3.23659	33.8035	1.27573	1.37395	2.12795	5.06502	0.159178	0.809292	1.59178	3.54854	1.2076	4.87476	6.71795	2.31149	3.08642	5.78793	14.2147	4.49717	0.750532	14.3614	34.4434	2.73351	2.48701	7.73834	2.40998	4.96669	2.02089	5.74091	2.28785	12.8401	7.9699
NCS_049	N	M	PU	39.7	UNK	-	N	N	-	1.28407	0.822047	2.90516	32.6469	1.31758	1.08088	2.09852	5.59263	0.0960781	0.734997	1.51323	3.57845	0.900338	4.29806	7.59875	1.89775	2.90676	6.11379	17.0867	5.03837	0.488909	13.5507	30.9658	3.07146	1.72873	9.08813	0.988319	5.55203	1.48808	5.5918	1.52191	15.1757	11.2773
NCS_050	N	M	PU	52.4	UNK	-	N	N	-	1.70687	1.04163	3.50341	33.932	1.05017	1.12593	2.00488	5.27696	0.158126	0.662309	1.59782	3.59165	0.915802	5.07877	7.05979	1.96168	2.33808	6.33241	15.7776	4.37867	0.505402	14.6758	34.3907	3.18327	2.7274	7.3233	1.80783	5.20927	2.07312	4.21989	2.70104	13.8097	7.87871
NCS_051	N	M	PU	40.2	28.4	-	N	N	-	1.24524	0.84023	3.00387	29.8201	1.24843	0.944832	1.90554	4.63325	0.14089	0.690759	1.46092	3.26573	0.902843	5.34012	7.09975	2.24675	2.5976	7.72172	19.422	4.81877	0.650707	16.6071	27.9114	3.42508	2.71553	7.87307	1.80067	5.65705	2.24735	4.80414	2.1017	15.4213	9.43563
NCS_052	N	M	PU	64.4	34.29	-	N	N	-	1.73821	1.07334	2.89844	34.3717	1.38658	1.3055	1.8443	5.19418	0.225067	0.689015	1.40704	3.54592	0.947164	4.43456	7.80303	1.78028	2.66497	5.27635	15.4806	5.31985	0.613898	14.8409	31.2474	4.33355	1.52403	9.01753	1.87522	6.43997	3.24022	5.18453	1.20597	11.0365	10.0542
NCS_053	N	F	PU	46.2	20	-	N	N	-	2.76143	1.75385	2.78494	34.9026	1.73465	1.48879	1.94696	5.99332	0.163557	0.754879	1.44685	3.81616	1.34427	4.59627	6.16342	2.29708	2.84619	5.22158	13.2527	4.08026	0.650267	15.1201	38.178	2.89648	1.41142	6.41788	2.51601	6.30431	2.71852	5.62986	0.816169	10.2489	7.74236
NCS_054	N	M	PU	54.2	26.3	-	N	N	-	2.23826	1.15747	2.77534	31.0139	0.960737	1.33998	2.4992	7.11412	0.199525	0.861419	1.65657	4.69288	1.31448	5.06676	7.21543	2.16415	2.78225	5.22188	14.2227	4.62015	0.882784	15.2554	33.0089	3.68922	2.28244	8.18817	1.8159	5.34531	1.99534	5.60977	1.67235	12.2191	8.91805
NCS_055	N	F	PU	51.2	23.71	-	N	N	-	1.53206	0.995281	3.33649	37.1535	1.56252	1.13818	1.65283	3.99346	0.0791775	0.643317	1.52417	3.50572	0.877278	5.08661	8.333	1.70791	2.32616	4.71402	13.813	5.76894	0.256338	12.4971	36.6651	2.87547	1.78989	6.77606	2.70586	5.9981	2.91277	4.16896	1.41476	12.1806	10.0154
NCS_056	N	M	PU	29.8	25.45	-	N	N	-	2.22599	1.38593	2.76973	32.6553	0.960704	1.45513	2.13671	6.62823	0.212294	0.878699	1.65898	4.32688	1.33211	4.84344	7.91336	2.2046	3.01616	4.62646	13.2435	4.86709	0.658758	15.2123	37.0496	2.6301	1.90654	7.50643	1.27606	4.7713	1.71339	6.17154	1.46338	11.5933	8.70595
NCS_057	N	F	PU	53.5	30.12	-	N	N	-	2.36296	1.85045	2.85256	34.9845	1.19151	1.47259	2.36755	6.4334	0.25817	0.836987	1.57958	4.15481	1.62653	4.74228	7.09964	2.54162	2.95829	4.36985	12.0654	3.53732	0.713985	19.4772	33.3015	3.20024	2.99407	6.92783	1.54582	5.02724	1.97939	4.7065	1.87371	11.9469	7.01952
NCS_058	N	F	PU	40.9	23.4	-	N	N	-	2.15531	1.1645	3.03667	35.8243	1.40704	0.973873	1.68423	5.16846	0.088466	0.576672	1.18256	3.54762	1.02032	4.31859	8.36245	1.89236	3.09529	4.6367	13.9603	5.48384	0.420508	15.028	30.6569	2.9275	1.94056	9.25665	0.835715	4.16111	1.87469	6.674	1.17393	13.9526	11.5184
NCS_059	N	M	PU	44.5	25.38	-	N	N	-	1.90421	1.09837	3.09164	36.6675	1.21646	0.910481	1.7504	5.04763	0.0910481	0.517836	1.34296	3.13435	0.840185	4.14582	7.14473	1.92901	2.65793	5.65672	15.5169	4.77363	0.562201	16.0797	33.8891	1.95938	0.783602	6.88059	1.16268	5.26507	2.22754	5.50927	0.65129	14.1663	11.4255
NCS_060	N	M	PU	36.3	24.82	-	N	N	-	2.4427	1.73557	2.6547	35.9932	1.11352	1.24572	1.99316	5.88908	0.0800822	0.738536	1.3347	4.14759	1.42742	4.43001	7.50366	2.26565	3.14642	4.55183	12.3181	4.56339	0.42492	17.4425	31.9067	3.4361	1.60758	6.65217	1.83238	5.86942	2.11307	4.95235	1.21184	13.2668	9.70908
NCS_061	N	M	PU	63.5	15.96	-	N	N	-	1.27732	1.11892	2.3461	35.3891	1.1825	0.957938	1.33795	4.37158	0.0633347	0.593763	1.38545	3.34658	0.826975	3.8518	7.0485	2.06238	2.52092	6.21386	18.3817	5.22987	0.493506	15.1504	31.5235	1.87983	1.10643	6.82622	2.09573	6.63037	2.10935	4.56981	2.09649	16.3442	9.66764
NCS_062	N	F	P	37.8	21.8	-	N	N	-	2.97094	2.08863	2.19615	37.877	1.06954	1.62827	1.60283	6.55646	0.101767	0.824313	1.19067	4.76391	1.81909	3.85031	7.83999	2.23724	3.25904	3.57294	9.975	4.25458	0.321304	19.0547	30.9488	3.44961	1.75114	7.81522	1.86382	5.44293	2.12953	5.90017	1.05989	10.7698	9.81435
NCS_063	N	F	P	41.6	22.68	-	N	N	-	1.43836	0.881693	2.3569	42.819	1.8023	0.919813	1.32886	4.47972	0.691699	0.378963	1.21415	3.64121	0.735499	3.48379	6.70915	1.43093	2.24755	4.41677	14.8862	3.81166	0.325855	13.7223	27.2365	4.04309	1.4031	7.34985	2.03597	6.97405	3.30773	5.0021	1.67633	17.7471	9.50181
NCS_064	N	F	P	47	24.93	-	N	N	-	2.55635	1.6805	3.18964	32.0939	1.16164	1.30232	2.24949	6.40924	0.190659	0.667828	1.55236	4.25507	1.36567	5.11237	7.10197	2.41388	2.94137	5.24819	13.3678	4.54218	0.597618	15.1818	29.3155	2.49039	1.2884	8.10907	1.67221	6.30835	1.81832	5.21208	1.10986	16.3313	11.1628
NCS_065	N	F	P	50.1	23.14	-	N	N	-	1.47031	1.1136	3.62538	31.5816	0.888174	1.14796	3.28568	7.36578	0.10514	0.631915	2.26374	3.58632	0.800801	4.96492	6.43745	2.30849	2.47332	6.17226	15.1525	4.09519	0.529515	9.9648	37.0035	0.754564	1.70599	7.46435	2.23721	5.48218	0.714097	5.08207	2.85317	18.3972	8.3409
NCS_066	N	F	P	37.2	23.88	-	N	N	-	1.95105	1.41474	2.96065	30.8182	1.06317	1.47274	2.45025	6.26806	0.188772	0.712776	1.39951	3.60411	1.45144	5.04243	7.22768	2.49589	3.65205	5.72884	14.4443	4.85426	0.799012	12.9257	35.1528	2.65884	1.45053	8.22043	2.20878	6.23188	2.21854	6.96743	0.884319	13.0779	8.00295
NCS_067	N	F	P	40.8	23.23	-	N	N	-	3.61846	2.03178	1.79066	37.0266	1.55473	1.39274	1.16344	6.82397	0.226461	0.990767	0.608614	4.46546	1.63773	3.80506	8.68078	1.80341	4.08168	3.99653	8.94949	5.12522	0.226461	18.5253	29.1758	2.09349	0.978873	7.40815	9.2993	2.98024	2.08753	7.03416	0.978873	9.05691	10.3814
NCS_068	N	F	P	44	23.62	-	N	N	-	2.31021	1.48976	1.41863	41.1043	1.8064	1.24171	0.914261	7.11464	0.259365	0.473341	0.667865	4.43285	1.03435	2.97732	8.73862	1.445	3.78892	3.83074	9.32283	5.36951	0.259365	17.9433	35.9182	2.12829	1.03527	8.20729	1.12586	3.13604	1.03527	6.86575	1.03527	11.4711	10.0984
NCS_069	N	M	P	47.6	20.53	-	N	N	-	2.81595	1.4948	1.35354	40.8702	1.35536	1.30003	0.595453	5.32316	0.189786	0.495815	0.545634	4.48	1.30812	3.17519	8.94026	1.59712	4.19223	3.87442	9.67278	6.23037	0.189786	19.8257	31.7999	2.42007	1.49876	8.25987	0.807559	4.00924	2.07899	6.55287	1.11189	11.7516	9.88356
NCS_070	N	F	P	36.2	26.96	-	N	N	-	2.984	1.89618	2.13317	36.5226	1.23946	1.76374	1.40979	7.95969	0.159074	0.946491	1.00416	5.28549	1.78561	3.1818	9.59888	1.30467	4.24336	2.83076	7.72527	5.86669	0.159074	24.0116	37.8577	1.92625	1.20886	6.7979	1.20886	2.21432	1.20886	3.99896	1.20886	8.15446	10.2034
NCS_071	N	F	P	26.6	19.84	-	N	N	-	2.39181	1.46835	1.56132	39.6101	1.79649	1.172	0.952053	6.63072	0.136466	0.695175	0.929576	4.93428	1.49905	3.19288	9.15425	1.42911	3.85923	2.72718	9.32952	6.40197	0.128439	14.0388	38.1199	1.64349	0.929661	7.5855	1.76039	5.77054	3.61373	5.24961	0.929661	9.08742	11.2713
NCS_072	N	M	P	58.6	29.89	-	N	N	-	2.46581	1.3648	2.84299	32.9551	1.29452	1.1249	1.7947	5.83341	0.246239	0.613391	1.13552	3.69577	1.33705	4.38575	7.95979	2.22965	3.90809	4.39222	14.1269	5.8073	0.486057	16.0198	33.3024	1.87467	1.2634	6.22308	1.2634	4.72288	1.60987	6.06407	1.2634	14.9579	11.4351
NCS_073	N	F	P	40.2	21.3	-	N	N	-	2.56629	1.60712	2.42742	42.6328	2.03819	1.31496	1.02119	5.1305	0.105619	0.481888	0.806667	3.59988	1.08404	3.69301	7.70258	1.77579	3.20082	3.40585	10.5634	4.675	0.166973	16.4915	33.7674	2.56172	1.10629	8.58522	1.20788	4.50853	1.80148	6.12815	0.76114	12.47	10.6107
NCS_074	N	M	P	30	25.42	-	N	N	-	2.28483	1.61664	2.75249	35.6707	1.0979	1.19245	1.67432	6.05423	0.217752	0.673996	0.939446	3.2603	1.22727	4.06654	7.40905	2.15067	3.25854	4.17063	14.3772	5.23269	0.67233	18.9771	33.5666	2.44537	0.970793	6.58873	1.78234	6.96396	1.68532	5.56013	1.01854	11.9506	8.49059
NCS_075	N	F	P	40.1	21.3	-	N	N	-	2.97618	1.71898	2.64686	33.9304	1.26501	1.11303	1.5801	5.41561	0.0795018	0.735392	1.26209	5.13419	1.75114	4.70039	8.05696	2.22625	3.38397	3.83252	13.0114	4.78267	0.397356	19.645	27.9462	2.65934	1.77483	7.54944	1.07974	6.96198	2.56102	5.19199	1.17046	13.9788	9.48122
NCS_076	N	F	P	39.2	22.48	-	N	N	-	3.18064	1.82962	2.31303	32.1373	1.77523	1.15715	1.54036	5.58316	0.129974	0.607379	1.05196	5.65369	2.30324	4.63762	9.70358	2.20945	4.34364	3.25131	10.6108	5.74946	0.231413	19.6353	34.8543	1.89726	1.35159	7.29329	1.35159	2.6307	1.35159	4.0573	1.35159	13.4834	10.742
NCS_077	N	M	P	43.2	28.81	-	N	N	-	2.79499	1.76233	2.16382	31.154	1.64534	1.50177	0.0629012	7.69862	0.758921	1.06146	0.998557	5.26896	1.87365	4.21832	9.03825	2.03034	4.05247	3.11935	12.1965	5.76863	0.83075	18.7716	28.3429	4.39977	1.52431	8.10041	1.30395	5.756	2.63509	6.20447	1.06465	12.6214	9.27546
NCS_078	N	M	P	59.9	22.75	-	N	N	-	2.43436	1.8485	2.55886	37.6071	1.39534	1.46142	1.45193	4.93569	0.111979	0.715528	0.805681	3.37345	1.30923	3.63006	7.25162	2.26053	3.80601	3.94874	13.1138	5.2826	0.697533	15.7075	34.2955	2.68661	1.96053	7.26801	1.71241	4.78988	2.29351	6.3533	1.582	12.0524	9.29844
NCS_079	N	M	P	42.6	26.47	-	N	N	-	2.19929	1.43113	2.39348	30.0277	1.17658	1.09294	1.67631	5.78427	0.180292	0.743201	1.41146	4.98958	1.78669	4.81337	9.31536	2.3454	4.17516	4.01121	13.2453	6.4863	0.715016	15.969	29.7769	3.77978	2.91832	8.73806	1.54622	5.06004	2.40396	6.93963	1.47043	12.0945	9.30316
NCS_080	N	M	P	44.8	24.96	-	N	N	-	1.28611	0.956768	2.85458	32.1562	1.06758	1.15556	2.34947	6.41641	0.217437	0.646841	1.35385	3.73682	0.948078	4.25881	7.54098	1.95139	3.07353	5.5589	16.5963	5.20581	0.668584	15.7174	28.433	3.05006	1.60226	8.23336	1.41227	5.07198	1.75823	6.72146	2.07362	15.1735	10.7528
NCS_081	N	M	P	48.6	21.3	-	N	N	-	2.6682	1.62724	2.63184	33.4968	1.08712	1.31481	1.53929	4.98077	0.109674	0.600965	1.22502	3.99066	1.47706	4.86734	7.67962	2.55051	3.33703	4.93706	14.0116	5.35528	0.512119	16.8276	29.2499	3.8322	2.99141	7.22222	1.87127	5.54939	2.76324	6.18982	2.12809	12.842	8.53285
NCS_082	N	M	P	42.2	23.77	-	N	N	-	1.83579	1.39342	2.60568	33.8115	1.25027	1.29219	1.75848	5.36154	0.297874	0.599943	0.972216	3.83013	1.31051	4.32192	8.23458	2.16218	3.59416	4.59169	14.0735	5.69143	1.01099	20.1652	33.2984	4.48704	1.10596	6.00896	2.57703	6.55039	3.34719	4.08698	0.953963	10.2695	7.14935
NCS_083	N	M	P	49.9	29.91	-	N	N	-	2.36764	1.25267	1.42539	37.8076	2.03716	1.39897	1.07424	9.88348	0.840942	0.914181	0.798754	5.50924	1.09469	2.84426	8.54592	1.08003	2.74725	3.19565	9.89695	5.16186	0.123122	23.6937	29.8005	4.43723	0.63941	6.59154	1.07818	5.10769	3.17399	3.7301	0.757073	11.3671	9.62354
NCS_084	N	M	P	50.1	28.31	-	N	N	-	2.58437	1.62973	1.62976	37.7156	2.09054	1.40025	1.26654	9.31417	1.20088	0.742518	0.705264	4.75541	1.42152	2.73592	9.97522	1.19971	3.74823	2.29398	7.62951	5.8581	0.102771	16.209	33.2187	2.98994	0.759441	10.0557	0.759441	1.90139	1.79286	8.59615	0.759441	10.145	12.8129
NCS_085	N	M	P	51.3	29.4	-	N	N	-	1.73632	1.22952	1.83797	36.8443	1.59042	1.36171	1.31742	7.69612	0.433915	0.853465	0.95895	4.81069	1.22198	3.2846	9.40685	1.34434	3.42497	3.43448	10.3279	6.54647	0.337641	15.3318	35.0195	2.00623	1.1434	8.4563	1.28767	4.04989	2.09146	5.07127	1.32242	13.6146	10.6054
NCS_086	N	M	P	55.1	28.39	-	N	N	-	2.53476	1.26309	2.61689	38.1174	1.48127	1.13252	1.45177	5.22558	0.184516	0.599955	1.07636	3.16929	1.04088	3.79152	6.51033	1.89273	2.96247	4.76469	14.8185	4.7785	0.586941	20.5868	32.589	2.23285	0.697711	7.42983	0.645549	5.44389	1.2374	5.37998	1.27929	14.124	8.35367
NCS_087	N	M	P	49	25.34	-	N	N	-	2.16921	1.23206	2.37709	35.6397	1.53586	1.14014	1.43957	5.6137	0.386146	0.760091	1.09407	4.14641	1.2039	3.67145	9.90141	1.7614	3.69876	2.86204	11.7757	7.08431	0.50703	17.5551	32.5803	4.32557	1.50923	9.55263	0.58209	3.46604	2.38084	6.50748	0.679246	10.567	10.2945
NCS_088	N	M	P	43.6	26.3	-	N	N	-	2.09542	1.33613	2.79022	32.8427	1.10807	1.17807	1.68072	5.158	0.19442	0.753968	1.49223	4.04643	1.2846	4.85335	8.62408	2.14934	3.25734	4.66863	13.8954	6.01104	0.579829	13.3732	32.9497	2.56156	1.95638	9.29921	2.06542	6.12953	1.96527	5.97677	1.32294	12.2979	10.1021
NCS_089	N	F	P	60	31.4	-	N	N	-	2.35333	1.64745	2.34348	31.4711	1.23087	1.58356	2.34456	8.77592	0.351932	1.13666	1.6127	5.58564	2.0076	4.28549	9.1583	2.07726	4.00285	3.24989	9.19635	5.13892	0.446151	16.1962	29.14	4.64078	1.46383	9.70563	1.03062	4.79155	3.45798	7.93162	0.558166	9.4905	11.5931
NCS_090	N	F	P	40	21.8	-	N	N	-	1.78893	1.21954	1.92524	32.8925	1.43227	1.25388	1.39045	6.60775	0.266309	0.828803	1.38727	5.00848	1.42935	4.07753	9.56859	2.02438	3.45748	3.92255	13.6181	5.40597	0.494712	15.4195	37.7717	1.65735	0.879465	7.542	1.99935	5.93336	1.64159	4.9283	0.691113	11.7988	9.73747
NCS_091	N	F	P	47	24.5	-	N	N	-	2.72262	1.90167	2.30401	33.3984	1.50134	1.6744	1.77797	6.79223	0.473016	0.966663	1.0616	4.31232	1.68859	4.14855	7.41482	2.37547	3.67712	3.94856	11.9496	5.07649	0.834593	11.7537	32.2072	1.63404	2.17779	9.54639	1.97723	6.37405	2.04475	8.31529	1.00883	12.9397	10.0209
NCS_092	N	F	P	40	18.7	-	N	N	-	2.26886	1.27359	2.23134	31.1886	1.41001	1.03155	0.073682	5.33367	0.208776	0.666822	1.00392	4.67296	1.56383	4.6667	9.64785	2.33809	3.86348	4.52792	15.2421	6.27981	0.506445	19.1235	31.773	3.75082	0.917392	5.6324	2.18233	7.93377	3.91473	4.42751	0.68697	10.7682	8.88937
NCS_093	N	F	P	60	27.6	-	N	N	-	2.22757	1.45726	2.73506	27.9397	1.08036	1.42851	2.95363	8.29229	0.382423	0.978082	1.89825	4.81747	1.5366	4.74556	7.19982	2.32884	3.34549	5.04506	13.9821	4.53762	1.08829	20.2177	23.8533	3.94962	2.41349	7.13802	2.48578	6.49733	3.2227	6.33543	2.06858	12.9879	8.83016
NCS_094	N	F	PU	43	23.5	-	N	N	-	2.58579	1.45631	2.63965	31.8183	1.44345	1.42283	2.04241	6.9275	0.443167	0.846755	1.402	4.7719	1.57103	4.57614	8.60455	2.09618	3.4154	3.84838	11.8431	5.56714	0.678021	19.0216	32.1336	4.21759	1.75459	7.51552	1.52129	5.39805	2.67805	5.73786	0.929755	10.2488	8.84332
NCS_095	N	F	P	63	20.5	-	N	N	-	1.97899	1.45477	2.77498	33.4168	1.16816	1.40515	2.3318	6.91207	0.264015	0.784403	1.30358	3.79971	1.38648	4.58179	7.40615	2.43986	3.50139	4.73242	12.9868	4.60418	0.766513	18.3841	28.7824	3.77286	2.01806	7.99151	2.05931	6.37168	2.63464	7.16274	1.54083	11.3097	7.9721
NCS_096	N	F	P	61	30.4	-	N	N	-	2.65031	1.92258	3.18257	33.6986	1.06382	1.75602	2.70432	7.14904	0.270652	0.988096	1.65399	3.85192	1.53092	4.64452	6.52132	2.55773	3.07683	4.92201	11.3199	3.72818	0.806648	15.9083	30.5903	3.7074	2.25036	8.30725	2.27691	5.93696	2.15802	7.33239	1.64959	11.1978	8.68471
NCS_097	N	M	P	65	32.6	-	N	N	-	2.02986	1.51422	2.90201	31.4855	1.11501	1.65879	2.7146	7.66781	0.489937	0.980191	1.58919	4.08961	1.29797	4.33578	8.08501	2.21095	3.40252	4.22752	12.5035	4.83373	0.866359	13.8519	33.715	2.25484	3.0697	9.5626	0.677466	2.8892	0.934836	7.76086	2.00015	13.3304	9.95313
NCS_098	N	M	PU	47	27.7	-	N	N	-	2.74964	1.37627	1.69506	35.3473	1.44265	1.44584	1.05933	6.97276	0.146016	0.800224	0.846033	5.44888	1.56394	3.53748	9.58953	1.61658	4.04155	3.53577	10.4327	6.18074	0.171624	16.4598	31.9647	2.95455	1.27394	8.97615	0.874922	4.25227	2.1177	6.05179	0.835289	12.5505	11.6883
NCS_099	N	F	P	62	24.3	-	N	N	-	2.62735	1.46671	1.5702	34.1378	1.69248	1.52854	1.35423	7.73674	0.298518	1.06462	1.20674	5.93893	1.72644	3.6926	8.65421	1.78649	3.70191	3.79414	10.2362	5.40098	0.384177	20.1478	28.7001	3.50182	1.18358	7.00285	1.35191	6.15104	3.27406	5.46464	1.0076	12.4522	9.76237
NCS_100	N	F	P	32	34.8	-	N	N	-	2.26686	1.76223	1.37649	36.712	2.47478	1.83451	0.644726	10.1788	2.07584	1.24485	0.683261	4.34505	1.73014	2.27361	9.85756	1.25115	4.96478	1.90222	6.31004	5.92622	0.184866	18.7567	35.3023	3.698	1.07785	8.51223	0.898966	3.00415	2.10905	7.82444	0.903164	8.69953	9.21361
NCS_101	N	M	P	44	26.5	-	N	N	-	2.72005	1.83707	1.39707	42.5194	1.38211	1.57414	0.887107	7.222	0.125048	0.819434	0.644366	5.29991	1.68478	2.32021	9.53735	1.13226	3.99499	2.42378	6.4594	5.90181	0.117692	17.4651	32.2453	3.93221	1.24187	10.8649	0.852601	2.59079	2.10462	8.58153	0.804204	9.34468	9.97221
NCS_102	N	F	P	40	24.7	-	N	N	-	2.47315	1.98342	1.56547	42.4036	1.92097	1.60886	1.05049	7.81966	0.281086	0.899068	0.811054	4.93233	1.58502	2.52482	8.7565	1.2793	3.72647	2.22059	7.05848	4.90422	0.195451	16.2793	32.3027	4.60443	1.03016	9.46469	1.17279	4.96258	3.24304	8.46767	0.457319	8.00521	10.0101
NCS_103	N	F	P	40	25.2	-	N	N	-	2.01348	1.42546	1.77594	40.0819	1.52229	1.15191	0.965574	5.26317	0.146422	0.627623	0.813115	4.56533	1.32727	3.43251	9.76471	1.41725	3.63679	2.85637	10.3367	6.60967	0.266487	13.5295	34.6754	3.03175	0.865326	8.33524	1.48738	5.38225	2.50352	5.24714	1.14685	13.3615	10.4341
NCS_104	N	F	P	43	24.6	-	N	N	-	2.11501	1.6501	2.41765	35.3383	0.93682	1.36776	1.97302	7.7823	0.168584	0.91502	1.46318	4.75218	1.36923	4.43756	7.65351	2.01084	2.79951	4.23138	12.3089	3.85711	0.452017	16.4945	35.9586	2.08803	1.1762	8.35454	1.1762	6.06281	1.38709	3.89318	1.1762	12.494	9.73868
NCS_105	N	F	P	54	25.7	-	N	N	-	1.93943	1.37708	3.10583	33.6086	1.25161	1.32851	2.82246	8.16636	0.538024	0.907649	1.86093	4.253	1.18807	4.54347	6.57586	1.97187	2.47538	5.03123	12.7452	3.67794	0.631567	15.0957	31.3166	3.56426	2.23923	6.59626	4.43685	8.66792	2.24773	4.13378	1.71205	11.8248	8.1648
NCS_106	N	M	P	42	27.7	-	N	N	-	1.77727	1.46858	3.05519	32.6972	1.32134	1.51899	2.38191	6.87654	0.243047	0.780689	1.6338	3.80778	1.09733	4.46439	6.71347	2.29562	2.81728	5.62171	14.5093	4.15663	0.761899	14.8323	29.332	2.79527	1.57416	8.67662	1.82504	5.92487	2.31429	5.95667	1.57249	15.0107	10.1856
NCS_107	N	M	P	38	24.2	-	N	N	-	2.47734	1.86579	2.51431	36.8031	1.22152	1.34524	1.48056	6.00754	0.182534	0.843758	1.17808	4.46918	1.54748	3.97916	8.07293	1.92003	3.42598	3.50075	11.4162	5.26848	0.479982	14.4011	34.8865	2.78777	2.50719	8.87014	1.3172	4.17448	1.88114	6.20372	1.30613	12.5543	9.1104
NCS_108	N	F	P	43	19.1	-	N	N	-	1.98258	1.4989	2.32912	39.1381	1.66084	1.36849	1.60978	5.81688	0.0935718	0.607047	1.21643	3.56244	1.15966	3.65083	7.69385	1.92157	3.35808	3.95181	12.2314	4.80779	0.340832	20.0421	33.7672	3.21667	0.881482	5.64751	1.6532	6.92064	3.16395	3.66654	0.670387	11.606	8.76438
NCS_109	N	F	P	32	22.3	-	N	N	-	2.60515	1.8951	2.64164	35.4458	1.45315	1.58924	1.78305	6.17838	0.287558	1.00781	1.22488	3.87981	1.64171	4.43258	7.838	2.45307	3.90177	3.61506	10.3992	5.01861	0.708461	14.3374	31.0736	2.85442	1.60347	8.85333	2.42926	5.56962	2.6445	9.12074	1.51316	9.76214	10.2383
NCS_110	N	F	P	45	28.9	-	N	N	-	3.05509	1.79452	2.97519	34.3202	1.26541	1.26694	1.71501	5.29362	0.0857505	0.826604	1.3442	4.77325	1.93964	5.20806	7.44561	2.56947	3.54543	4.41364	11.4392	4.21955	0.503571	18.5339	26.8219	3.85387	1.73882	6.89172	3.1289	7.60866	3.48389	5.3452	1.27016	11.8639	9.45913
NCS_111	N	F	P	40	21.6	-	N	N	-	2.55803	1.73894	2.42705	32.9513	1.12509	1.40969	1.81867	6.62688	0.214064	0.785771	1.35748	4.85265	1.63827	4.65828	8.20737	2.13338	3.43676	3.92063	12.1963	5.20919	0.734194	16.5957	29.0077	3.50332	1.34717	9.47188	1.84023	6.42807	2.76451	7.14062	0.533756	11.5291	9.83788
NCS_112	N	F	P	37	23.4	-	N	N	-	1.98496	1.43403	2.56632	34.4391	1.58739	1.3182	2.05846	6.79132	0.366993	0.689611	1.59892	4.38806	1.35713	4.39591	8.14784	1.96825	3.19554	4.08425	11.9136	5.11785	0.596308	19.3761	31.5596	4.08109	1.03695	7.21486	1.80622	6.37585	3.63102	5.17237	0.518063	10.7502	8.47771
NCS_113	N	F	P	56	UNK	-	N	N	-	3.26595	1.9543	2.52082	31.2159	1.34133	1.23061	1.4587	4.99751	0.217711	0.8487	1.29427	4.84043	2.31203	5.62867	8.06438	2.94552	4.11527	4.52192	11.8277	4.59459	0.803664	19.591	29.1347	3.51602	2.92225	7.20681	2.61837	6.17147	2.52909	6.33925	1.76583	10.8918	7.31341
NCS_114	N	M	P	46	29.1	-	N	N	-	2.51291	1.44332	2.71097	37.0406	1.66864	1.10765	1.5074	5.77482	0.250025	0.699566	1.08266	4.00902	1.26197	3.92936	7.97266	1.72846	3.36732	3.46221	12.2213	5.8923	0.356847	16.9909	35.6095	3.55271	1.26992	7.94544	1.02054	4.24934	2.34358	5.6125	0.93917	10.8988	9.56756
NCS_115	N	F	P	43	26.2	-	N	N	-	1.94606	1.33183	2.61311	36.4784	1.37331	1.26174	1.88014	6.3618	0.312693	0.790487	1.21613	3.85952	1.14728	4.14383	7.36347	1.75733	2.87541	3.97984	13.5663	5.06686	0.674399	17.7854	29.2182	3.23855	1.72806	8.84083	1.79417	6.6349	2.39288	5.62342	1.1324	12.4027	9.20843
NCS_116	N	M	P	48	26.5	-	N	N	-	2.19186	1.45949	2.22115	34.6454	1.37362	1.35228	1.7652	6.7474	0.427888	0.861578	1.19822	4.13567	1.42956	4.10766	8.06253	1.91619	3.40679	3.8757	12.7597	5.3259	0.736201	16.7506	33.2552	4.15418	1.68736	6.80527	1.8061	5.57523	3.01819	5.40622	1.78981	11.5082	8.24364
NCS_117	N	F	P	47	23.6	-	N	N	-	2.44655	1.57299	2.52951	33.822	1.4849	1.36441	1.91888	6.31415	0.48667	0.875981	1.10427	4.21658	1.6712	4.17717	8.3817	2.12343	4.17512	3.51871	11.5337	5.62241	0.659718	15.6661	31.1529	3.7179	2.39212	9.28093	2.03126	5.0705	2.61245	7.48128	0.98176	10.0345	9.57823
NCS_118	N	M	P	66	31.2	-	N	N	-	2.07991	1.38962	3.11111	31.0501	1.04897	1.2795	1.90195	6.3832	0.205559	0.89046	1.46969	4.17406	1.22175	4.66247	8.22364	2.10655	3.36136	4.73884	14.7842	5.18097	0.736025	15.1778	28.6316	3.59167	1.82225	8.931	1.50007	5.77948	2.14594	7.58499	0.777817	13.2672	10.7901
NCS_119	N	M	P	43	25.7	-	N	N	-	2.50819	1.5389	2.84898	32.752	1.15996	1.29181	1.67858	5.47354	0.25013	0.279248	1.23766	4.32996	1.59095	4.84767	7.83921	2.26666	3.405	4.54261	14.046	5.26862	0.844311	17.3406	31.0751	3.56947	1.22489	9.94661	1.36077	4.66281	1.85046	7.01615	0.763432	11.7958	9.39387
NCS_120	N	F	P	26	18.9	-	N	N	-	1.73207	1.18024	2.54768	31.9258	0.973984	1.15821	0.774305	5.72674	0.0957917	0.761108	1.50654	4.38723	1.19663	4.67227	7.33184	2.41646	3.29606	6.05922	17.2501	4.50458	0.503145	14.876	36.2826	1.25713	2.2691	7.73887	3.38509	7.1277	1.27145	4.59095	1.19684	12.722	7.28225
NCS_121	N	F	P	32	24.3	-	N	N	-	1.31947	0.835363	3.00423	35.432	1.90222	1.00892	1.59201	4.54378	0.193049	0.440885	1.31298	3.17029	0.83265	4.69528	8.09219	1.79258	2.98955	5.31947	14.6262	6.63153	0.265399	13.8886	31.6861	1.64926	0.984282	7.43846	2.59318	7.03635	2.51276	4.56343	1.42077	14.0983	12.1286
NCS_122	N	F	P	58	25.71	-	N	N	-	2.29333	1.58473	3.34539	32.7046	1.39847	1.23563	2.16092	5.18118	0.200495	0.633009	1.6205	3.71539	1.2463	5.09179	7.06786	2.51371	2.782	6.14398	14.0803	4.27181	0.728561	18.7344	31.4586	3.04587	1.26681	6.59518	2.44939	6.47739	2.48516	4.95424	1.13095	12.8059	8.59613
NCS_123	N	M	P	58	33.17	-	N	N	-	2.18158	1.22705	3.53907	31.407	1.22163	1.17992	2.30657	5.55072	0.393573	0.76253	1.24413	4.15079	1.37315	5.1706	10.2743	2.16024	3.50047	4.21671	11.7839	5.84165	0.514449	23.5195	30.2909	5.11467	1.29485	7.29974	1.29485	3.08979	1.61857	2.85342	1.29485	12.5506	9.77823
NCS_124	N	F	P	44	20.76	-	N	N	-	2.31615	1.8101	2.61201	33.431	1.30271	1.24736	1.75897	5.29402	0.144862	0.7796	1.50073	4.32166	1.57943	4.63477	7.17798	2.68797	3.19401	5.1294	14.0762	4.32883	0.672213	15.6961	31.7889	3.23585	1.56241	7.7456	1.22811	5.16321	2.05413	5.89031	1.27718	14.7622	9.59601
NCS_125	N	F	P	57	22.99	-	N	N	-	1.77689	1.42403	3.41443	35.8801	1.37542	1.28153	2.29436	5.3235	0.128612	0.666028	1.66737	3.50062	1.19804	4.87964	6.96959	2.543	2.91743	5.44272	12.5169	4.26893	0.530843	15.3441	35.3847	2.56792	0.95108	6.93658	2.1756	7.23286	2.08049	5.23946	0.95108	11.4295	9.70669
NCS_126	N	M	P	63	26.23	-	N	N	-	2.171	1.42514	3.00057	31.5785	1.02326	1.14234	2.32571	7.03947	0.238721	0.810026	1.71005	4.66462	1.35028	4.79469	7.92964	2.19226	2.94621	4.73555	13.7175	4.50945	0.695022	20.9243	41.7406	2.60208	1.38777	6.29649	1.38777	2.2319	1.38777	2.06803	1.38777	12.279	6.30653
NCS_127	N	F	P	54	26.64	-	N	N	-	1.94685	1.37579	3.03	29.6498	1.39999	1.01284	1.90791	4.7582	0.220397	0.753741	1.79014	4.44702	1.4037	5.64702	9.19567	2.49144	3.27964	5.18285	13.9074	5.98497	0.614628	17.3121	25.5926	5.14192	1.10604	7.96544	3.18247	8.39016	3.82308	4.82515	0.767378	12.0387	9.85493
NCS_128	N	F	P	44	23.88	-	N	N	-	3.28454	2.10853	2.8676	35.8124	1.67674	1.25225	1.52358	4.42437	0.121468	0.744396	1.12007	3.5804	1.47068	4.60707	7.1888	2.31644	2.97594	4.81278	12.6426	4.68062	0.78873	18.997	35.5248	2.41996	1.1944	5.65875	2.33983	6.79831	2.30965	3.37932	1.06041	12.7312	7.58638
NCS_129	N	M	P	51	34.66	-	N	N	-	2.23575	1.3863	3.19727	31.7935	1.12037	1.04417	2.09751	5.80111	0.28551	0.649709	1.50825	4.33552	1.19562	4.75224	9.00522	2.01902	2.86239	4.77926	13.7277	5.652	0.551605	14.5019	33.4369	2.40041	1.70029	9.97537	0.800137	3.3913	1.16455	5.00183	1.20449	15.6879	10.7348
NCS_130	N	F	P	66	25.78	-	N	N	-	2.15378	1.46825	3.2459	35.4187	1.42346	1.23125	2.25194	6.74443	0.392759	0.795652	1.3152	3.77752	1.18385	3.93618	7.55721	1.94812	2.93368	4.37924	12.9625	4.28355	0.596755	18.2832	34.1307	2.00984	0.992514	8.96501	0.992514	2.48866	1.20342	7.05784	0.992514	13.091	9.79278
NCS_131	N	M	P	33	21.45	-	N	N	-	2.34046	1.75401	2.83339	37.2933	1.43724	1.31823	1.78736	5.41972	0.297044	0.6795	1.15515	3.22829	1.11766	3.99902	6.8086	2.11782	3.09151	4.50111	13.3253	4.73518	0.760103	18.8531	33.7521	1.84349	1.02069	7.34607	1	6.25197	1.74759	6.25951	0.820192	13.3647	7.74056
NCS_132	N	F	P	63	24.17	-	N	N	-	2.26996	1.74434	3.15392	33.8236	1.18413	1.50735	1.14519	7.02044	0.158271	0.979775	1.73345	4.35773	1.53092	4.76863	6.72471	2.48995	3.12832	5.08462	12.602	3.93012	0.662611	15.5559	32.4967	3.89748	2.1416	7.66207	1.92621	5.38535	2.61863	6.91955	1.46888	11.0177	8.90987
NCS_133	N	F	P	31	21.46	-	N	N	-	2.12087	1.63421	2.71735	33.5583	1.25695	1.30999	2.08946	6.21955	0.184914	0.836935	1.7612	4.09861	1.28129	4.63124	6.70308	2.39361	2.58326	6.02877	14.1133	3.74901	0.728145	12.7595	33.7938	2.44109	2.32924	8.6472	2.00226	5.55681	1.00185	6.32995	1.22372	14.9302	8.98444
NCS_134	N	M	P	38	21.5	-	N	N	-	1.75216	1.47353	2.23344	35.9329	1.4269	1.28348	1.70257	5.88049	0.192521	0.720318	1.1787	3.62567	1.07315	4.14458	6.97036	2.08488	2.77467	4.87108	15.4619	4.55054	0.666188	19.9464	32.2811	3.18075	1.35476	6.96881	2.01277	7.37314	1.72308	4.2797	1.14293	13.3118	6.42476
NCS_135	N	F	P	44	26.45	-	N	N	-	2.08018	1.4894	2.54331	31.8191	1.42061	1.11984	1.73542	5.78239	0.20956	0.753107	1.24426	4.45529	1.42144	4.63904	9.05381	2.2263	3.43974	4.79958	13.8534	5.19913	0.715039	16.3172	30.8995	3.0278	1.36316	9.02835	0.957507	5.13411	1.49143	6.02998	1.09277	14.158	10.5002
NCS_136	N	M	P	65	26.3	-	N	N	-	2.35543	1.39654	2.9112	31.3932	1.3838	1.07654	1.97573	6.49771	0.327444	0.716342	1.50553	4.43481	1.2899	4.25903	8.84682	1.96166	3.25069	4.14956	13.9616	5.59827	0.708173	14.9965	28.0313	1.66656	1.66656	9.02501	1.66656	2.71678	1.66656	6.11256	1.66656	16.0171	14.7679
NCS_137	N	F	P	60	23.42	-	N	N	-	3.05399	2.21524	3.27118	32.8064	1.13781	1.67858	2.27144	5.85926	0.141429	0.857146	1.28572	3.95452	1.85105	5.47385	6.95029	2.93797	3.30504	4.83487	11.5128	3.81451	0.786873	21.3822	27.5399	4.07744	1.9483	6.87484	2.64945	7.0949	3.1959	6.05761	1.59968	9.62191	7.95785
NCS_138	N	F	P	55	21.26	-	N	N	-	2.27038	1.34774	2.76271	31.709	1.2396	1.27145	2.3638	7.13731	0.186506	0.792355	1.56628	4.65874	1.54783	4.68201	7.87699	2.42465	3.50635	4.42662	12.6742	4.78317	0.772254	19.9932	24.8826	5.33644	0.97289	7.50726	2.82087	7.62505	3.73913	5.68063	0.718162	11.0361	9.6876
NCS_139	N	M	P	27	24.3	-	N	N	-	2.56214	1.44203	2.96799	33.4374	1.28544	1.08202	1.64201	5.25868	0.0759313	0.717551	1.33829	4.3774	1.34596	5.0866	7.62386	2.24102	2.90384	5.06789	13.8901	5.11754	0.53628	16.9167	29.4902	3.61638	1.81403	7.37278	1.98872	6.91863	3.25994	5.22911	1.16339	13.0523	9.17778
NCS_140	N	F	P	54	28.73	-	N	N	-	2.32193	1.41418	3.43485	30.7155	1.26256	1.2994	2.88611	6.8086	0.267924	0.771464	1.781	4.45473	1.49283	5.08862	7.67731	2.44593	3.22112	5.01419	12.3346	4.7547	0.552462	21.414	28.1962	3.74577	0.912226	7.77849	1.21615	5.06101	1.95563	6.0176	0.652976	12.9843	10.0657
NCS_141	N	M	P	43	37.13	-	N	N	-	2.45298	1.6211	2.94092	31.3234	1.29202	1.48645	2.50494	7.48667	0.722805	0.957933	1.32129	4.23258	1.42113	4.5501	7.7077	2.20948	3.28602	4.3493	12.4518	4.7421	0.939311	17.8284	34.4022	3.96592	0.952684	7.72016	1.0546	4.29392	2.05541	5.21838	0.854392	12.9652	8.68872
NCS_142	N	F	P	27	17.58	-	N	N	-	2.73484	1.83701	2.48627	36.3771	1.29934	1.40852	2.19666	6.50087	0.124434	0.794995	1.64184	3.87607	1.24675	4.37269	7.18082	2.09175	2.45188	4.71889	12.3324	3.85258	0.474291	15.917	32.6086	3.2293	2.31484	6.56479	2.915	6.82928	3.17574	5.53149	1.58183	11.7337	7.5984
NCS_143	N	F	P	62	28.63	-	N	N	-	2.57643	1.24118	2.01889	33.4914	1.38277	0.0628447	0.0628447	5.16907	0.221925	0.750995	1.37473	4.14159	1.53577	5.21377	8.67568	2.65499	3.66347	5.56279	14.216	5.24214	0.740735	15.0225	34.2333	2.77777	1.98302	8.18758	1.46709	4.01706	1.89698	5.70924	1.6162	12.9702	10.1191
NCS_144	N	F	P	48	29.37	-	N	N	-	2.62297	1.50453	3.20383	30.3352	1.14893	1.2262	2.08354	5.31956	0.184685	0.772604	1.47542	4.66998	1.63059	5.3877	9.55113	2.29413	3.26207	4.60177	12.6282	5.50457	0.592386	21.2457	27.8327	4.68609	1.97529	8.39516	0.819752	5.38111	2.30401	5.50838	0.827412	11.7136	9.31076
NCS_145	N	F	P	79	21.88	-	N	N	-	1.73012	1.18018	3.11332	32.2906	0.976154	1.17186	2.6003	6.27186	0.142738	0.704877	1.67408	3.98485	1.26122	4.88618	7.44965	2.30824	2.93299	6.22224	13.8177	4.77927	0.501592	18.6176	32.4852	2.90724	2.26435	7.4635	1.69438	5.49884	2.26454	4.30625	2.24886	11.8459	8.40336
NCS_146	N	M	P	59	25.08	-	N	N	-	2.86411	1.65094	3.18465	30.2514	1.09924	1.37305	2.64746	7.80714	0.25113	0.864513	1.62732	5.01868	1.58859	4.96155	7.98114	2.20609	3.13011	4.45776	11.7214	4.74322	0.570513	19.7592	26.186	4.26563	1.61908	8.11388	1.21246	5.72435	2.0337	5.99502	0.930859	13.8902	10.2697
NCS_147	N	F	P	59	29.05	-	N	N	-	3.11077	2.01368	2.92503	30.6039	1.36543	1.54471	2.05961	6.37661	0.258738	1.00406	1.2023	4.36351	1.79461	4.88554	7.75566	2.63987	3.6947	4.61869	12.7686	4.50022	0.513809	22.4509	33.1559	3.75393	1.21004	7.18997	0.68655	4.1418	1.62213	5.64092	0.693912	10.2831	9.17086
NCS_148	N	M	P	65	25.45	-	N	N	-	1.99936	1.24827	3.0091	34.0179	1.34948	1.19859	1.88351	5.69948	0.237943	0.599297	1.28421	3.60082	0.994085	4.4202	7.07747	2.10427	2.544	5.61439	15.41	5.1335	0.574143	19.8551	35.1394	2.62172	1.97328	6.73789	1.85125	5.20191	1.53893	4.69233	1.56746	11.4555	7.36521
NCS_149	N	F	P	39	22.2	-	N	N	-	2.08972	1.57744	3.42047	36.6861	1.18046	1.34529	2.15247	5.80561	0.0986549	0.696862	1.27354	3.43982	1.08792	4.14445	6.37327	2.2837	2.74358	5.21116	13.8308	3.99191	0.566745	18.1847	33.4509	2.27323	1.32023	7.78681	1.59151	5.97588	1.86916	6.3228	0.838914	11.8361	8.54987
NCS_150	N	F	P	52	22.72	-	N	N	-	2.38787	1.71368	3.113	37.6887	1.92961	1.40192	2.0813	6.24378	0.130178	0.656453	1.41304	3.76866	1.29617	4.27726	7.25537	2.14988	2.83749	4.37751	10.7401	4.33395	0.204125	19.5883	30.547	4.28401	0.872322	5.84233	1.82787	8.47433	4.71781	4.75363	0.694731	9.6431	8.75453
NCS_151	N	F	P	63	26.2	-	N	N	-	2.59172	1.88959	3.4508	30.384	0.908661	1.44648	3.00428	7.36127	0.220916	1.00815	2.10397	4.58286	1.41161	5.25524	6.18136	2.74759	2.58316	5.73881	12.6528	3.57882	0.897939	18.1619	37.1628	1.64699	2.8249	6.96605	0.850871	3.8075	1.1241	5.37482	1.92876	12.2678	7.88354
NCS_152	N	M	P	45	28.09	-	N	N	-	2.09031	1.22598	3.14103	31.1752	1.19057	1.17428	2.06478	5.60088	0.221145	0.733927	1.56571	4.862	1.20208	4.8214	8.54688	2.01776	2.66306	5.05275	14.7259	5.23207	0.692327	18.2616	32.1672	2.14286	0.963722	7.31949	0.907032	5.38538	1.0771	4.92155	0.907032	16.4118	9.53522
NCS_153	N	M	P	63	29.65	-	N	N	-	2.1171	1.37702	3.03867	30.3371	1.1424	1.40734	2.69483	7.5415	0.268919	0.845303	1.61352	4.82544	1.41267	4.80912	7.73614	2.31479	3.0833	4.81357	13.4783	4.40871	0.734343	22.1892	29.1906	4.09617	0.877543	7.78847	0.702035	5.32935	2.16502	4.84023	0.702035	12.1983	9.92107
NCS_154	N	F	P	65	38.1	-	N	N	-	2.51595	1.4676	4.02122	32.0366	1.18731	1.1874	2.86794	6.05276	0.148425	0.737886	1.69629	3.81896	1.31201	5.51097	6.63127	2.60299	2.84533	6.21871	13.2319	3.41461	0.493903	18.5635	25.0001	4.49193	1.68338	8.42825	1.47247	6.04289	2.43097	6.53128	1.29628	14.1241	9.9348
NCS_155	N	F	P	45	28.03	-	N	N	-	2.4083	1.90816	3.50606	34.513	1.15955	1.44879	2.5015	6.27458	0.126769	0.798647	1.74761	3.96978	1.33175	4.64803	6.66739	2.46671	2.80333	5.2412	12.171	3.56311	0.744813	13.1403	35.0112	1.62181	1.76246	9.59826	0.906104	3.94681	0.784428	8.11306	0.833518	13.7291	10.553
NCS_156	N	F	P	72	31.14	-	N	N	-	2.16168	1.39205	3.7954	29.1247	1.11752	1.31298	2.61202	6.75505	0.487038	0.892248	1.71921	4.10476	1.25536	5.00022	7.30675	2.3139	2.88334	5.91355	14.6706	4.41312	0.768497	19.3866	29.614	2.69093	2.64138	9.20509	1.13012	4.51432	1.6947	6.2093	1.22471	12.4854	9.2035
NCS_157	N	F	P	57	23.44	-	N	N	-	2.05881	1.44565	3.19882	34.7068	1.34253	1.26951	1.96598	5.44939	0.104911	0.648863	1.34004	4.08702	1.31976	4.71392	8.48673	2.29802	3.56172	4.54458	11.8227	5.32918	0.305108	13.3819	29.2115	3.82793	0.923469	10.2112	1.6878	5.3977	2.81999	8.1917	0.504107	11.1238	12.7189
NCS_158	N	M	P	64	24.72	-	N	N	-	1.88127	1.08798	3.4803	35.9066	1.3705	1.1722	2.12859	6.57477	0.327587	0.637998	1.35116	3.97477	0.996836	4.00648	8.46004	1.58537	2.62633	4.40972	12.5868	5.13847	0.296259	18.8855	31.0105	3.89824	1.41518	7.40032	1.04437	5.00561	2.52392	4.3314	1.4166	13.8079	9.26043
NCS_159	N	F	P	53	30.12	-	N	N	-	2.3507	1.7458	3.5766	31.961	1.1809	1.36681	2.45539	5.64095	0.177064	0.695832	1.59669	3.47167	1.38767	5.26853	6.69273	2.85105	2.99066	6.4556	13.3073	4.18945	0.63755	13.5925	30.5221	3.15424	2.78071	8.80486	3.11743	6.18604	1.78888	6.06472	2.01506	12.4707	9.50271
NCS_160	N	F	P	52	27.51	-	N	N	-	2.07104	1.33173	3.35794	32.7281	1.19135	1.18405	2.57616	6.26298	0.218466	0.683748	1.41753	4.03118	1.28191	4.80534	9.18729	2.24589	3.40558	4.45087	11.9289	5.25006	0.389873	17.2349	29.6778	3.67146	1.30822	9.43783	0.827312	4.77093	1.92013	6.39837	0.791668	13.0993	10.862
NCS_161	N	M	P	25	30.72	-	N	N	-	2.30627	1.29687	2.78631	28.1265	0.980487	1.28551	2.17127	6.07502	0.360996	0.814737	1.30288	4.60404	1.38566	4.74847	10.0133	2.22082	3.59021	4.70579	13.9145	6.69592	0.61447	15.338	31.953	3.36315	2.01058	9.10845	0.621451	3.67834	1.85704	7.18835	1.45735	13.0147	10.4096
NCS_162	N	F	P	28	26.83	-	N	N	-	2.18749	1.49938	2.75754	30.5349	1.31683	1.40445	1.94209	5.71167	0.278592	0.794393	1.4264	4.19024	1.53876	4.78636	7.82233	2.56737	3.70027	5.05638	14.6128	5.13878	0.733025	18.8593	35.6359	3.29853	1.29002	6.39178	1.79623	5.29921	2.26978	5.01934	0.653175	11.9131	7.57372
NCS_163	N	M	P	77	23.94	-	N	N	-	2.74627	1.87012	3.14398	34.351	1.22136	1.42066	1.78819	4.64039	0.0918834	0.798679	1.61856	4.15717	1.58862	4.9832	6.51069	2.65569	2.84127	5.57967	13.0032	4.04938	0.93998	15.8866	29.5428	3.66448	1.77239	7.28351	2.54875	6.88735	3.14841	5.25621	1.06708	13.3136	9.62882
NCS_164	N	M	P	63	26.28	-	N	N	-	2.18811	1.38741	2.68257	31.4889	1.31795	1.14388	1.61552	5.14461	0.155824	0.645627	1.33336	4.48397	1.18404	4.49919	10.0606	2.00712	3.03386	4.34952	14.8518	5.83232	0.59374	16.4595	26.562	4.57745	1.21004	8.67301	0.71647	5.59394	3.50274	6.24071	0.636862	15.3657	10.4615
NCS_165	N	F	P	73	25.1	-	N	N	-	2.96007	2.05766	2.80005	31.2052	1.04347	1.67369	2.33715	6.84778	0.333858	1.11805	1.59916	4.58226	1.86416	5.15996	7.95407	2.62853	3.6049	4.40651	10.9899	4.09769	0.735833	17.8358	29.624	4.78333	2.65332	7.72001	2.90045	6.34633	3.0619	5.79361	1.50457	9.59965	8.17703
NCS_166	N	M	P	76	28.38	-	N	N	-	3.07168	1.93285	2.52138	37.4927	1.63362	1.33514	1.5856	6.31569	0.383059	0.827096	1.10106	4.22481	1.56384	3.56431	7.5513	2.06099	3.56858	3.55936	10.9861	4.07538	0.645446	23.4508	32.4121	3.37524	0.520561	7.32709	0.680362	4.07368	3.09382	5.83279	0.520561	8.31869	10.3943
NCS_167	N	F	P	45	21.14	-	N	N	-	2.33114	1.3867	3.0456	32.9966	1.02223	0.965339	1.95521	5.24413	0.130605	0.624631	1.4764	3.64276	1.19176	4.95625	6.67833	2.60893	3.05485	6.55164	15.3175	4.29619	0.523211	16.7451	31.503	2.60142	2.00831	6.2686	2.95552	7.63156	3.06164	5.36544	1.75947	11.948	8.15202
NCS_168	N	F	P	54	23.78	-	N	N	-	2.52861	1.44677	2.86227	35.3701	1.46626	1.08895	1.81463	5.23753	0.0996927	0.57515	1.1503	3.73063	1.3741	4.74707	8.37686	2.23638	3.40853	4.77373	12.3523	4.94318	0.41692	19.2961	30.0323	4.23254	1.27918	8.08373	1.52467	5.71863	2.90216	5.85847	0.991013	10.7328	9.34843
NCS_169	N	M	P	54	25.68	-	N	N	-	1.9216	1.20191	2.507	32.3882	1.66131	0.989959	1.91995	6.12901	0.589211	0.572087	1.11433	4.37316	1.22738	4.02947	9.44107	1.80638	3.2702	3.97465	14.1192	6.09248	0.671387	16.9874	30.9148	3.62652	1.30807	9.01316	0.823743	4.46848	1.93498	6.41523	0.735993	12.5065	11.2652
NCS_170	N	F	P	54	28.23	-	N	N	-	2.03827	1.27298	3.2979	35.1207	1.43509	0.977764	1.98037	5.79238	0.401827	0.575739	1.34008	3.58912	1.13248	4.43003	7.97294	1.96146	2.9961	4.86828	13.2958	4.9597	0.560953	15.5929	31.4334	2.91018	1.5344	7.41136	2.04579	6.70248	3.15697	4.80541	0.874893	13.3351	10.1971
NCS_171	N	M	P	56	33.95	-	N	N	-	1.83861	1.14115	2.77833	33.3958	1.54559	0.981091	2.10851	6.35667	0.539753	0.672356	1.44762	4.67854	1.33588	4.02929	8.51912	1.90945	3.38652	4.01464	13.1474	5.62738	0.546367	14.1548	31.0345	2.74759	1.31838	11.5056	0.458568	2.32447	1.42213	9.12459	0.881386	11.6888	13.3392
NCS_172	N	F	P	52	18.83	-	N	N	-	2.10205	1.53796	3.16151	35.8716	1.35527	1.12118	1.83075	5.35471	0.0925248	0.680329	1.66545	3.89095	1.17197	4.7554	6.85233	2.28874	2.48564	5.9045	13.6628	3.76785	0.446575	14.8537	32.9288	3.22165	2.74689	7.68756	2.53256	5.32571	2.45289	5.56301	2.46102	12.1608	8.06538
NCS_173	N	F	P	74	23.83	-	N	N	-	1.88855	1.37779	2.9652	31.7407	1.37516	1.21388	2.63797	7.08046	0.331161	0.820493	1.70842	4.44204	1.26565	4.62601	7.51343	2.1709	2.85903	4.99736	14.0308	4.11878	0.83628	21.367	23.1806	5.12948	1.15317	7.63499	0.959309	6.42741	3.80504	5.1464	1.21576	13.1637	10.817
NCS_174	N	M	P	74	24.31	-	N	N	-	1.62349	1.23607	3.48399	35.9017	1.18488	0.941501	2.1881	5.25887	0.084782	0.53867	1.68159	3.58827	0.912207	4.6038	6.59529	2.03174	2.19773	6.31311	15.3571	3.80727	0.469848	11.2342	32.1197	2.31217	2.80373	8.40307	2.90172	6.31869	1.95733	5.25039	3.06561	15.0704	8.56294
NCS_175	N	M	P	71	27.44	-	N	N	-	2.0626	1.46699	2.96302	32.311	1.24751	1.12611	2.28121	6.35562	0.218626	0.791576	1.61613	4.22489	1.39703	4.84304	7.87427	2.18263	3.14552	4.79778	13.4627	4.93196	0.69975	15.889	36.3009	2.77241	1.64955	6.7299	1.97319	5.55982	2.44894	4.59593	1.17411	12.2536	8.65262
NCS_176	N	F	P	67	25.71	-	N	N	-	2.5837	1.66661	3.41941	36.1452	1.34164	1.11518	2.08087	5.84102	0.287093	0.699132	1.5441	3.78735	1.47815	4.71516	6.88713	2.41315	3.27816	4.88518	11.1648	4.05995	0.606982	14.521	31.7027	4.06508	1.94806	6.99473	2.46046	7.09036	2.22067	6.77727	1.48511	11.4663	9.26819
NCS_177	N	M	P	69	24.84	-	N	N	-	1.99449	1.30807	2.95255	32.5449	1.10886	1.03747	2.05998	5.77167	0.268897	0.601432	1.46223	3.77401	1.2073	4.61652	8.01599	2.23697	3.22375	5.1758	14.3603	5.62085	0.65791	15.4476	29.9256	3.41388	1.86837	7.90856	2.27654	6.67529	2.36614	6.31894	1.755	12.3174	9.72668
NCS_178	N	M	P	52	25.83	-	N	N	-	2.2802	1.50755	3.04977	33.0583	1.21364	1.26656	2.46905	6.47499	0.5044	0.76088	1.44615	3.9099	1.26392	4.75931	7.30874	2.1352	2.83713	4.81527	13.9431	4.2739	0.722081	18.809	30.7415	3.10884	1.7958	7.98433	1.36513	5.48429	1.83002	5.55481	1.24745	13.0809	8.99785
NCS_179	N	M	P	54	28.73	-	N	N	-	2.03971	1.31808	2.51173	34.9394	1.24764	1.09992	1.30437	4.15677	0.143618	0.592894	1.17352	3.81819	1.20753	4.31168	9.06442	1.93713	3.00836	4.56704	15.0926	5.74903	0.716293	20.0908	29.024	4.5497	1.47447	6.47927	2.92669	6.98568	3.36079	4.21582	1.69471	10.8568	8.3413
NCS_180	N	M	P	53	24.69	-	N	N	-	1.88127	1.11177	3.08431	35.2694	1.31931	0.94543	1.63824	4.99514	0.276715	0.570039	1.15398	3.54607	1.08849	4.29982	9.06048	1.74863	3.16451	4.25697	13.8638	6.24109	0.484529	17.1207	29.2158	3.56872	1.48925	9.57425	1.00087	5.01831	2.69105	6.33204	0.679068	12.9207	10.3893
NCS_181	N	M	P	67	28.07	-	N	N	-	2.27398	1.1952	4.03376	33.0532	0.982302	1.02054	2.64637	6.27583	0.106735	0.692844	2.05981	4.1188	0.833233	4.85711	6.3649	2.09725	1.83742	6.62245	14.7782	3.69766	0.452403	24.603	30.3007	3.36929	1.39227	5.39049	2.18164	7.06606	2.07007	2.86542	1.4772	12.4357	6.84818
NCS_182	N	M	P	61	30.47	-	N	N	-	2.1162	1.51132	3.05251	35.5173	1.35417	1.33029	2.19398	6.26554	0.205367	0.815338	1.5755	3.66392	1.35664	4.5465	7.53004	2.2726	3.32572	4.29845	11.7367	4.70645	0.625531	17.2169	29.3673	4.41609	1.31658	8.70317	0.960552	5.14133	3.61581	6.31526	0.835496	11.3346	10.7769
NCS_183	N	F	P	54	20.7	-	N	N	-	2.5226	1.75697	2.84119	31.0609	1.32013	1.22836	1.95725	5.68105	0.177803	0.757206	1.54246	4.23058	1.6699	5.22308	6.88898	2.89804	3.42687	5.6185	14.2205	4.15416	0.823465	16.9499	26.0075	2.71825	2.43389	7.756	1.86048	6.53767	2.49915	6.43962	1.61288	15.7731	9.41156
NCS_184	N	M	P	50	27.76	-	N	N	-	1.87932	1.2834	2.57177	31.3619	1.3369	0.969937	1.5988	5.4358	0.436061	0.603736	1.12829	4.26423	1.32943	4.38022	10.2059	1.94434	3.6902	4.11103	13.821	7.05989	0.587845	20.2378	32.2846	4.50686	1.55769	6.39826	1.06176	4.81944	3.09736	3.93973	0.750694	12.0031	9.3427
NCS_185	N	F	P	39	21.26	-	N	N	-	1.69943	1.40581	2.66452	42.4127	1.31464	1.22908	1.74377	5.625	0.267166	0.552882	1.18825	3.24368	0.862374	3.53855	6.04286	1.69178	2.22327	4.52031	13.6748	3.53359	0.56553	17.4468	33.0513	2.51263	2.01295	6.46983	2.90211	8.11093	2.34774	4.15827	1.45364	12.8676	6.66618
NCS_186	N	F	P	73	28.23	-	N	N	-	2.07668	1.01368	3.67584	36.9192	1.2821	0.861784	2.18201	6.04688	0.28939	0.469905	1.40913	3.38674	0.73089	4.01016	6.21069	1.61229	1.94916	5.73728	15.3885	4.22681	0.520875	18.7869	36.4959	1.77271	1.0323	7.7682	0.745857	4.26047	1.00383	4.12571	1.26307	14.2068	8.53829
NCS_187	N	F	P	66	34.15	-	N	N	-	2.76294	1.74204	3.65657	32.2454	1.24612	1.22272	2.31773	5.783	0.27869	0.732503	1.49318	4.22658	1.87522	5.24891	7.66273	2.71124	3.65027	4.8434	11.2528	4.43892	0.609094	18.7595	28.0117	3.38289	2.48013	9.37363	1.19046	5.26384	2.00394	6.32937	0.99205	11.773	10.4395
NCS_188	N	M	P	70	25.36	-	N	N	-	1.78628	1.30367	3.17738	38.068	1.41535	1.11964	1.51609	4.60075	0.132541	0.567686	1.03491	3.15072	1.02641	4.36186	7.97944	1.80485	2.82956	4.24955	13.9545	5.30805	0.612784	17.1548	30.7057	4.36943	1.59351	7.73361	1.69398	6.6671	2.79493	4.58307	0.504247	12.9732	9.2263
NCS_189	N	F	P	67	23.05	-	N	N	-	2.43079	1.43188	3.1588	32.9277	1.39906	1.11557	1.70288	4.64088	0.239739	0.566236	1.23389	4.78106	1.65265	5.71451	10.2917	1.96631	3.43746	3.34124	11.117	6.31238	0.538285	17.9869	27.7755	2.26924	1.75342	8.21484	2.41825	7.61304	3.59839	4.72113	0.858091	11.521	11.2702
NCS_190	N	F	P	67	26.26	-	N	N	-	2.45895	1.54831	3.36474	34.0097	1.13024	1.26962	2.16272	5.8501	0.206818	0.72678	1.58366	4.12383	1.38281	5.17997	6.9737	2.20616	2.8026	5.05545	12.9562	4.38105	0.626572	13.6504	30.4594	2.57573	3.14308	8.38155	2.3024	5.72126	2.20689	5.68354	2.23113	14.2097	9.43491
NCS_191	N	M	P	69	25.86	-	N	N	-	2.18208	1.45218	2.89617	32.0229	1.04562	1.17802	1.95655	5.3476	0.142175	0.718998	1.56798	4.23614	1.34956	4.92366	7.50379	2.43786	2.91201	5.96516	14.8161	4.60635	0.739017	18.3867	31.1172	3.12893	1.83707	6.41165	2.01827	6.34655	2.05089	5.12787	2.25904	13.1261	8.18976
NCS_192	N	M	P	47	25.64	-	N	N	-	2.64014	1.5668	3.1632	35.7429	0.975533	1.21165	1.77876	4.7029	0.0709	0.514289	1.21694	3.85473	1.48451	5.07077	7.36185	2.36496	3.07631	4.85131	12.8766	4.91653	0.558416	13.821	29.7175	2.49801	3.23398	9.17556	1.24549	4.54398	1.75662	6.6531	2.37902	15.2581	9.71768
NCS_193	N	M	P	64	33.5	-	N	N	-	1.82512	1.34228	2.81033	32.1751	1.1232	1.22466	2.4362	6.24844	0.177773	0.737428	1.5407	4.52256	1.23917	4.84734	8.26118	2.27164	2.67708	5.13438	14.3005	4.42666	0.678214	18.0302	33.7144	2.86649	1.50204	7.21208	1.45618	4.62281	2.06387	4.59149	0.917276	12.9383	10.0849
NCS_194	N	F	P	42	16.67	-	N	N	-	2.28041	1.55226	3.28284	33.6586	1.21946	1.17275	1.88981	4.32514	0.119669	0.57042	0.15158	3.72456	1.35858	5.50977	7.45348	2.76301	2.95181	5.87246	15.0236	4.47753	0.642316	13.5656	29.3097	3.62188	1.89894	9.62199	2.08616	5.93202	2.51494	7.40604	1.44019	12.622	9.98049
NCS_195	N	M	P	46	19.94	-	N	N	-	2.40769	1.73179	2.23583	36.4635	1.47868	1.20987	1.31284	5.05432	0.201345	0.695034	1.09403	4.245	1.52663	4.10368	8.94354	2.08904	3.82001	3.43672	11.7139	5.6545	0.582083	13.2201	31.6795	3.5905	1.66632	8.99101	1.60585	5.59076	2.90237	8.06077	1.24975	11.5174	9.92562
NCS_196	N	F	P	71	22.99	-	N	N	-	2.18183	1.39457	2.75764	33.3199	1.24453	1.18482	2.17245	7.15822	0.22974	0.801921	1.69054	4.8072	1.44381	4.57577	7.36949	2.09971	3.22703	4.35582	12.9266	4.38839	0.670016	18.0799	34.3244	2.32347	0.842218	6.37993	1.14426	5.27304	2.61531	4.88473	1.088	13.7269	9.31785
NCS_197	N	M	P	73	25.68	-	N	N	-	2.6323	1.54464	2.8403	35.3606	1.46618	1.0268	1.87896	6.26262	0.130325	0.748778	1.61129	4.5481	1.3693	4.32189	7.22004	2.10738	3.1739	4.0607	12.6516	4.43563	0.608654	20.1031	33.19	3.17958	1.6825	7.62067	0.946345	4.39549	2.10202	5.53869	1.03634	11.6909	8.51441
NCS_198	N	M	P	51	24.11	-	N	N	-	2.69018	1.63332	2.57266	33.823	1.12848	1.23592	1.58905	5.67701	0.136835	0.756689	1.16656	4.87473	1.79783	4.58181	8.98787	2.19058	3.55218	3.49813	12.1066	5.49541	0.505133	15.8743	23.1565	3.77528	2.65426	10.0477	2.09177	5.68626	3.26828	7.42366	1.87562	12.8778	11.2685
NCS_199	N	F	P	73	20.2	-	N	N	-	2.36197	1.63477	2.43096	41.1335	1.49083	1.06182	1.23889	5.34674	0.154834	0.536665	0.844336	3.16506	1.22198	3.58545	7.18423	1.99601	3.52383	3.65282	12.1577	4.80685	0.470702	18.6922	27.2703	3.77299	1.09154	7.62337	2.04258	7.56824	3.68735	7.30418	0.853069	10.1111	9.98308
NCS_200	N	M	P	60	23.29	-	N	N	-	1.98223	1.27769	2.84458	40.0404	1.71466	1.04267	1.51909	5.20418	0.169917	0.586986	1.23576	3.39492	0.90878	3.6209	7.21506	1.68705	2.71242	4.06466	13.4829	4.89815	0.396946	13.7771	32.4576	2.54737	2.18312	8.38944	1.00042	4.07941	1.90545	7.32762	2.0021	13.838	10.4923
NCS_201	N	M	P	66	29.4	-	N	N	-	3.02559	1.70203	2.73802	33.2297	0.968768	1.1848	1.66359	5.88435	0.149317	0.755513	1.20915	5.02924	2.03062	4.79352	8.96893	2.36017	3.85511	3.43362	11.0761	5.57333	0.36859	17.3316	31.493	3.18271	1.80309	8.8766	1.06381	4.10228	2.03336	6.94987	1.22274	11.8286	10.1123
NCS_202	N	F	P	59	29.74	-	N	N	-	2.84081	1.62145	3.16218	33.8196	1.21086	1.20155	2.03608	6.15246	0.208905	0.796336	1.36728	4.50394	1.68376	4.53813	8.80333	2.19866	3.82038	3.77967	10.8509	4.99998	0.403772	19.8794	29.8851	3.99257	1.09636	7.35697	1.26995	5.44512	3.78789	6.80994	0.829548	9.67269	9.97446
NCS_203	N	M	P	55	30.76	-	N	N	-	1.68212	0.967137	2.18886	34.2287	1.94908	1.10011	1.79176	7.40849	1.09289	0.722744	0.978583	4.06698	0.930624	3.28234	8.80786	1.32645	2.78761	3.13942	14.6806	6.3515	0.51617	19.2524	28.7183	3.3114	1.82798	8.33388	0.790061	4.4838	1.97621	5.60448	1.33464	14.4022	9.96459
NCS_204	N	M	P	50	28.04	-	N	N	-	2.39887	1.00238	2.22404	30.0238	1.32009	1.06711	1.90483	7.69096	0.425289	0.714873	1.26078	5.2836	1.53903	4.11537	11.1839	1.719	3.94584	3.13707	12.103	6.57822	0.361913	20.6632	35.1495	1.59036	1.49194	8.10168	1.49194	2.14739	1.49194	4.64811	1.49194	10.8935	10.8385
NCS_205	N	M	P	45	32.74	-	N	N	-	2.99173	1.16428	2.95962	36.9784	1.88823	1.00399	1.64736	6.43694	0.505827	0.545437	1.00399	3.75191	1.02898	3.68405	8.11155	1.40671	3.27419	3.31913	12.2561	5.60188	0.439693	13.9952	24.0094	2.44663	1.2369	12.1012	0.420526	3.09904	1.50552	10.0274	0.805233	13.2468	17.106
NCS_206	N	M	P	39	25.66	-	N	N	-	1.93983	1.33647	2.31409	34.1399	1.36038	1.37168	1.60434	6.17732	0.377131	0.865393	1.23039	4.40601	1.20336	3.72812	8.5462	1.77137	3.04526	3.58882	15.0589	5.16615	0.76894	19.2711	28.0014	3.47394	1.54987	8.27228	1.20371	5.79662	2.14876	6.68161	1.63873	11.8515	10.1105
NCS_207	N	F	P	38	20.86	-	N	N	-	3.07308	1.6404	3.08258	37.3672	1.48818	1.48138	1.46599	5.25877	0.0701245	0.583787	1.06063	3.8842	1.36603	4.59912	7.43566	2.09376	2.81484	4.13461	12.0826	4.55868	0.458347	16.6635	27.2857	3.55544	1.65587	7.51891	2.75152	7.18105	4.19202	6.04706	1.09619	11.2566	10.7961
QC_01	QC	QC	QC	QC	QC	QC	QC	QC	QC	1.91274	1.21808	3.06983	33.7926	1.19786	1.2509	2.12117	5.99366	0.294485	0.653882	1.47834	3.79824	1.15003	4.64635	7.18775	2.13439	2.73304	5.45632	14.8615	4.34528	0.703544	18.047	30.3375	3.11745	1.44517	7.14021	2.05963	7.09988	2.68389	4.67296	0.980722	13.6552	8.76034
QC_02	QC	QC	QC	QC	QC	QC	QC	QC	QC	2.10835	1.17628	2.74578	35.8312	1.30944	1.02121	1.91732	6.51501	0.292015	0.70745	1.21362	3.99126	1.11893	4.25548	7.76795	1.89154	2.94407	4.44772	13.5002	4.72068	0.524512	17.7127	33.4119	2.4062	1.76043	7.49736	1.46105	6.72941	1.95557	4.12475	0.875573	12.5671	9.49799
QC_03	QC	QC	QC	QC	QC	QC	QC	QC	QC	1.94253	1.12111	2.85498	33.7014	1.21362	1.09058	2.03734	6.35791	0.327261	0.685105	1.43313	4.06766	1.27107	4.4308	7.90143	1.8978	3.00338	4.74658	14.5979	4.81557	0.502811	16.8126	31.2041	2.39128	1.13138	7.39496	1.69864	7.09027	1.78404	5.12773	1.39488	14.2584	9.71173
QC_04	QC	QC	QC	QC	QC	QC	QC	QC	QC	1.88813	1.18863	2.83116	34.4721	1.28637	1.11802	1.97945	6.17604	0.338905	0.658032	1.31606	4.06779	1.18433	4.32991	7.66669	1.95252	2.98914	4.76123	14.4729	4.68909	0.633516	17.7998	33.0547	2.07845	1.23341	7.6327	1.62215	6.9753	1.85568	3.96584	0.976323	14.1594	8.6462
QC_05	QC	QC	QC	QC	QC	QC	QC	QC	QC	2.03514	1.1623	2.9742	34.7788	1.31082	1.07399	2.19087	6.33504	0.29548	0.609672	1.41315	3.89564	1.12234	4.44382	7.44849	1.98338	2.84946	4.8759	14.3068	4.34867	0.546062	16.9381	31.7452	3.14018	1.40234	8.04379	1.74742	6.8024	2.23322	5.14249	1.03098	12.9882	8.78573
QC_06	QC	QC	QC	QC	QC	QC	QC	QC	QC	2.01034	1.26232	3.05926	35.7019	1.3225	1.08412	2.15943	6.24291	0.259926	0.534991	1.41407	3.80175	1.08131	4.34875	7.07211	1.93312	2.80796	5.17526	14.0534	4.13325	0.541341	17.2353	33.0978	2.64681	0.986827	7.95882	1.64076	6.47233	2.05318	4.28183	0.851362	13.4515	9.3235
QC_07	QC	QC	QC	QC	QC	QC	QC	QC	QC	1.93989	1.09882	3.08596	32.5104	1.2056	1.09451	2.25238	6.21025	0.234964	0.791857	1.61798	3.98285	1.16401	4.7924	7.5563	2.19288	3.03125	5.24757	14.6947	4.63655	0.65888	16.252	30.8823	3.35661	1.62084	7.22074	2.36594	7.18326	2.35826	5.12972	0.721115	13.925	8.98424
QC_08	QC	QC	QC	QC	QC	QC	QC	QC	QC	2.14281	1.41341	2.72461	35.1655	1.32662	1.37983	1.94117	6.70887	0.279946	0.744941	1.41369	4.13219	1.23857	4.09899	7.72876	1.92673	3.08375	4.19611	12.9525	4.78437	0.616569	17.3972	31.3807	2.76777	1.18151	7.89558	1.75983	7.09677	2.80834	5.22332	0.901734	12.5065	9.08077
QC_09	QC	QC	QC	QC	QC	QC	QC	QC	QC	2.0429	1.34292	2.80579	34.5678	1.27685	1.10633	1.98548	6.67801	0.284106	0.612118	1.45358	4.006	1.17922	4.24658	7.87724	1.89765	2.95784	4.55969	13.6709	4.94841	0.500535	18.1544	32.4948	1.77475	0.913431	7.16597	2.2942	7.0582	1.90861	4.36055	0.934727	13.9776	8.96278
QC_10	QC	QC	QC	QC	QC	QC	QC	QC	QC	2.00227	1.38729	2.62543	35.3069	1.25874	1.05137	1.92271	6.64258	0.345883	0.665356	1.15113	4.0451	1.13002	4.05795	8.07521	1.98469	2.98745	4.28922	13.6962	4.8479	0.526588	20.0487	33.7522	1.8104	1.17678	5.92285	1.99299	5.9632	2.12729	3.52707	1.17678	13.432	9.06971
QC_11	QC	QC	QC	QC	QC	QC	QC	QC	QC	1.97814	1.30562	2.87744	34.2226	1.38871	1.11679	2.17529	6.68327	0.354109	0.687823	1.37565	3.93766	1.16914	4.4449	7.48524	1.90466	2.95385	4.62754	14.1538	4.6213	0.53652	16.6463	30.8315	3.00138	1.15674	8.11294	2.33575	6.72574	2.75734	5.23588	0.941456	13.1718	9.08316
QC_12	QC	QC	QC	QC	QC	QC	QC	QC	QC	2.06263	1.20667	2.96624	34.1936	1.34921	1.13577	2.08004	6.49332	0.279749	0.630985	1.44225	3.89277	1.15551	4.36184	7.6765	2.00949	2.84316	4.93555	14.1926	4.56635	0.525731	17.7134	31.1752	2.78065	0.907324	7.42087	2.0704	6.88357	2.83104	4.98713	1.02877	13.0267	9.17499
QC_13	QC	QC	QC	QC	QC	QC	QC	QC	QC	2.02546	1.36047	2.96333	33.527	1.27169	1.1986	2.14793	6.60981	0.330342	0.659232	1.40408	3.86541	1.13905	4.40317	7.35142	2.07043	2.81088	5.20842	14.5508	4.5756	0.526875	16.4955	30.8772	3.63651	1.06262	7.81086	1.865	7.99375	2.08259	4.77969	0.870579	13.0921	9.43356
QC_14	QC	QC	QC	QC	QC	QC	QC	QC	QC	1.96321	1.20791	3.02907	33.1203	1.2307	1.04529	2.18603	6.31676	0.167639	0.746052	1.62943	3.84795	1.08578	4.64105	7.35224	2.22589	2.78918	5.60959	14.6582	4.63179	0.515901	17.7754	31.6987	2.70244	1.23618	7.29342	1.76035	7.32105	2.36779	4.55719	0.84396	13.5141	8.92946
QC_15	QC	QC	QC	QC	QC	QC	QC	QC	QC	2.1608	1.40561	2.98841	35.2061	1.30301	1.14842	2.09348	6.43109	0.291873	0.63163	1.35896	3.90059	1.11374	4.38374	7.33648	1.91193	2.82264	4.92316	13.6979	4.27969	0.610783	16.8577	31.9279	3.25851	1.13921	7.21368	1.59129	6.69085	2.65303	5.47971	1.28003	13.1828	8.72537
QC_16	QC	QC	QC	QC	QC	QC	QC	QC	QC	2.04128	1.30497	2.89731	34.8652	1.29533	1.08904	2.09441	6.54293	0.220937	0.609862	1.41172	4.04569	1.06332	4.12912	7.60496	1.99538	2.87493	5.0084	13.7934	4.54722	0.564619	17.25	31.3427	3.28704	1.02553	7.17041	2.07516	7.22211	2.19824	5.39024	0.677874	13.6483	8.71244
QC_17	QC	QC	QC	QC	QC	QC	QC	QC	QC	2.08959	1.27401	2.98586	33.9787	1.24228	1.10178	2.0744	6.54589	0.258133	0.695768	1.57025	3.96067	1.18482	4.40053	7.52758	2.00112	2.88083	4.94275	14.0788	4.69444	0.511816	18.8534	31.9057	2.6496	0.920477	6.77547	1.6684	6.20349	2.13488	4.64165	0.903043	13.6569	9.68705
QC_18	QC	QC	QC	QC	QC	QC	QC	QC	QC	2.07328	1.33685	3.13955	34.9678	1.24569	1.05172	2.31122	6.48936	0.305653	0.612598	1.51794	3.82034	1.07696	4.44299	6.89831	2.02854	2.54019	5.24041	14.1357	4.1552	0.609684	17.9794	31.2638	2.28403	1.05007	7.40397	2.27673	7.10398	2.1117	4.9306	0.87729	13.9665	8.7519
KCS_001	T	M	P	70.7	28.3	papRCC	pT1b	Gx	N0M0	1.80657	1.14974	1.98914	37.2819	1.49354	1.89645	1.20239	5.75849	0.226062	0.776175	1.09486	3.73101	1.02878	3.33056	8.59734	1.62206	3.09327	3.26051	13.8362	6.29884	0.52612	19.8899	27.0823	3.80988	1.19192	7.85081	1.88102	7.61531	3.39515	4.42855	1.08232	11.5036	10.2692
KCS_002	T	M	PT	80.1	27	ccRCC	pT3a	G2	N0M0	3.04159	1.88116	2.51039	33.2484	1.21441	1.47121	1.63278	6.67216	0.204441	0.948205	1.38829	4.37707	1.46334	4.22313	8.60058	2.01856	3.71901	3.49526	11.6605	6.01804	0.211492	20.6529	34.8401	2.19425	1.4941	8.02141	1.05642	3.33291	1.05642	5.56985	1.05642	11.1376	9.5876
KCS_003	T	M	PT	59.2	27.7	ccRCC	pT1a	G2	N0M0	2.11668	1.69148	2.18859	36.8654	1.40725	1.41336	1.44302	6.23003	0.177906	0.62366	1.06744	4.77385	1.50225	3.86964	8.77211	1.96996	3.11756	3.20835	11.7525	5.44534	0.363574	21.6541	28.2646	3.92946	1.6823	7.90416	1.56925	5.86784	2.79055	5.27418	0.909756	11.0709	9.08288
KCS_004	T	M	PT	75.5	34.4	ccRCC	pT3a	G2	NxMx	1.56961	1.06451	2.84484	41.3151	1.19219	1.33398	1.97069	7.64347	0.246448	0.621772	1.06945	3.63522	0.636262	3.00738	8.02558	1.17466	2.43882	3.26495	12.0507	4.6549	0.239421	18.247	34.3852	2.32382	1.15858	8.18439	1.14192	5.5789	1.43751	3.92083	1.14192	12.4842	9.99577
KCS_005	T	F	P	51.4	15.79	ccRCC	pT3	G4 (sarcomatoid)	N1M1	0.805463	1.02277	1.72924	40.8338	1.56399	1.36503	1.39861	9.67864	0.844171	0.728013	0.719741	3.01277	0.592801	2.30658	6.60166	1.20177	1.82262	3.44687	16.8312	2.80922	0.68502	14.0151	36.1759	3.32934	3.32934	3.32934	4.45799	14.1817	3.32934	3.32934	3.32934	7.86393	3.32934
KCS_006	T	M	P	82.3	27	papRCC	pT1a	Gx	NxMx	2.07876	1.10583	2.54188	40.055	1.14216	1.07053	0.900526	4.01017	0.134658	0.309714	0.706955	3.16317	0.69649	3.56008	7.41475	1.47128	2.72386	4.53705	16.3002	5.59231	0.484666	19.8632	35.724	1.76436	1.76436	4.00627	1.8179	6.50777	2.07197	2.13047	1.76436	13.5651	9.0202
KCS_007	T	F	P	56.3	29	ccRCC	pT1a	G2-4	N0M0	1.85746	1.04	3.07314	32.7152	1.3845	1.13179	2.60529	7.31432	0.672084	0.679075	1.59137	3.78463	0.944097	4.84482	7.74094	1.73291	2.49109	4.90753	13.9011	5.04734	0.541345	14.7462	23.2984	4.64982	1.10365	10.2131	1.98873	6.32637	3.27643	6.95891	0.899133	13.5174	13.0219
KCS_008	T	M	PT	66.4	UNK	ccRCC	pT1b	G2	N0M0	1.98356	1.17946	2.25969	37.9612	1.46092	1.22057	1.28527	6.0565	0.210527	0.620745	0.932861	3.63849	0.892042	3.30984	8.11724	1.53093	2.9693	3.7117	14.2433	5.88678	0.529062	15.7631	37.2017	1.93197	0.857719	7.35157	0.857719	5.99266	1.90786	4.06805	0.857719	13.0549	10.155
KCS_009	T	M	PT	80.9	18.93	ccRCC	pT1b	G2	NxMx	1.40886	1.01302	2.66387	38.3353	1.22952	1.33104	1.69403	5.35405	0.0751726	0.60276	1.24138	3.31897	0.750835	3.78265	6.4211	1.81775	2.36053	5.44322	16.0397	4.45618	0.660014	16.5882	30.0337	3.35453	1.76858	6.3744	3.29776	7.65144	2.49711	5.16643	2.70798	12.5168	8.04307
KCS_010	T	F	PT	36.9	33	ccRCC	pT1a	G2	N0M0	1.82739	1.1108	4.43937	29.359	1.27629	1.25141	3.69704	7.44773	0.79135	0.731596	1.81936	3.27078	0.946995	5.45052	6.42511	2.14457	2.39685	6.8414	14.2314	4.02318	0.517787	21.0521	29.6552	2.31688	1.21908	5.89507	3.05097	8.20134	1.47625	2.68174	1.24875	15.8889	7.31378
KCS_011	T	M	PT	64.2	32.5	ccRCC	pT3a	G3	N0M0	2.55256	1.46595	1.51181	45.0523	1.36419	1.62392	0.789224	6.77539	0.129913	0.870419	0.644695	4.69858	1.40406	2.31383	10.3097	0.895192	3.73002	1.96379	5.99877	5.77577	0.129913	15.5288	33.2954	3.1268	0.687532	10.5521	1.70852	5.22865	3.27078	6.99909	0.57561	7.29996	11.7267
KCS_012	T	F	PT	52.6	31.5	ccRCC	pT3a	G3	N0M0	2.7065	1.59453	1.92455	33.1817	1.46918	1.26672	1.33005	6.96866	0.281357	0.825899	0.923436	4.56953	1.87483	3.55759	10.4987	1.85111	4.87059	3.87	9.64645	6.48289	0.305737	15.0816	30.6317	4.29181	0.914668	7.86358	4.16187	8.18348	3.54276	6.52345	0.669632	8.8435	9.29199
KCS_013	T	M	PT	66.3	27.4	ccRCC	pT2a	G1-2	N0M0	1.44724	0.764403	1.14587	39.8832	1.34342	1.02907	6.30805	7.3714	0.213832	0.534581	0.604076	4.38529	0.670994	2.23037	9.67902	0.601107	3.25396	2.7881	9.27038	6.26176	0.213832	16.0005	23.8026	4.2564	0.960543	6.30761	5.19025	14.1141	6.31094	2.75822	0.960543	10.159	9.17922
KCS_014	T	M	P	63.1	27.3	ccRCC	pT1a	G1-2	N0M0	1.8639	1.28826	1.47029	44.8263	1.85798	1.59656	0.0912322	7.35892	0.204132	0.727577	0.699066	4.01791	0.921261	2.50473	8.69491	1.16246	3.09269	3.51873	8.88092	5.12543	0.096787	20.6894	33.2688	4.70992	1.06371	7.8934	1.53586	4.62244	3.11924	5.52452	1.05993	8.3594	8.15337
KCS_015	T	M	PT	70.5	30.69	ccRCC	pT1b	G2	N0M0	2.9186	1.66514	1.87322	45.8068	1.49067	1.34081	0.800959	5.40268	0.128153	0.544652	0.55106	3.8415	1.29897	2.3828	8.27997	1.20033	3.59101	2.38145	8.83847	5.53465	0.128153	14.458	33.6455	3.30345	0.627576	9.70787	1.21679	4.48178	2.97872	8.17659	0.644697	9.12319	11.6358
KCS_016	T	M	PT	60.3	35	ccRCC	pT3a	G2	N0M0	2.12388	1.08231	1.94071	36.2834	1.25474	1.19932	1.42197	8.45015	0.25997	0.647369	1.0328	5.28599	1.44939	3.12364	10.2677	1.16312	4.28945	2.34494	9.56063	6.66881	0.149681	20.7421	34.2107	1.94036	1.81759	8.80496	1.81759	1.81759	1.81759	4.57218	1.81759	10.1786	10.4632
KCS_017	T	M	PT	52.9	22.64	ccRCC	pT1b	G2	N0M0	1.22032	0.917998	2.37182	36.2894	2.16703	1.07235	1.92432	5.76394	0.408081	0.603196	1.27341	3.31495	0.810058	3.59376	6.79527	1.69941	2.49615	5.51103	16.2899	4.95601	0.521526	10.9084	33.4194	2.40896	0.783419	7.09676	2.54608	8.1929	2.8102	3.95956	0.783419	15.941	11.1499
KCS_018	T	F	PT	65.7	UNK	ccRCC	pT1b	G2	N0M0	1.33106	1.04805	2.62602	32.4873	1.2102	1.10971	1.94265	5.44513	0.188283	0.718188	1.28946	3.98633	1.07223	4.56133	7.82238	2.36251	3.11571	5.71346	16.2595	5.17576	0.5347	12.7238	34.5272	1.99168	2.31022	9.3305	2.48409	4.79264	1.38968	5.87215	1.68936	13.2991	9.58963
KCS_019	T	M	PT	77.5	22.99	papRCC	pT2a	G2	N0M0	1.82674	1.09986	3.65773	40.1965	1.59002	1.02863	1.57788	4.07319	0.074239	0.355016	1.02863	2.50871	0.596631	4.05692	5.19746	1.90991	2.3324	6.65996	16.1376	3.64208	0.449898	20.5784	34.2476	1.61967	0.903487	5.51959	1.16968	6.16653	1.6443	3.57645	0.903487	15.1794	8.4914
KCS_020	T	M	PT	65.7	28.38	ccRCC	pT3a	G2	N1M1	1.22033	0.839914	2.02434	39.3316	1.1025	1.01505	1.20178	5.80599	0.0814481	0.667874	0.983486	3.86901	0.884118	3.37419	8.90918	1.47378	3.24202	3.68244	14.0865	6.00455	0.199897	14.6952	38.2507	1.6488	1.14182	9.041	1.1087	4.99738	1.63271	4.46587	0.84685	12.4527	9.71827
KCS_021	T	M	PUT	51.2	UNK	ccRCC	pT1a	G2	N0M0	2.11618	1.24759	2.46562	33.3913	1.20583	1.15564	1.76925	6.05264	0.198401	0.746562	1.27836	3.88462	1.45655	4.175	9.22593	2.05351	3.926	4.10432	13.0205	6.19364	0.332478	20.4181	25.8616	4.82568	0.879514	8.28285	1.90994	7.20289	3.24951	5.68751	0.610045	10.9519	10.1205
KCS_022	T	M	PUT	81.2	23.88	ccRCC	pT1a	G1	N0M0	2.19602	1.34874	2.41348	33.2478	1.14619	1.1857	1.90564	6.82078	0.153217	0.777636	1.32429	4.23535	1.18846	4.31808	6.556	2.00628	2.62317	5.5358	15.7876	4.45565	0.774105	16.2738	28.9977	1.90986	1.98688	5.80499	3.75489	8.84133	2.88383	4.06631	2.80685	14.7828	7.89071
KCS_023	T	F	PUT	81	28.04	ccRCC	pT2b	G2-3	N0M1	1.74571	1.41615	2.68288	33.4896	1.23959	1.44967	2.61739	8.81196	0.642081	0.977533	1.43637	4.55695	1.37636	4.18942	8.32257	1.83228	3.10163	3.93285	11.0703	4.5577	0.55102	16.6738	27.911	4.05939	2.41778	6.82494	4.37101	9.18965	3.50433	4.0241	1.38539	10.846	8.79267
KCS_024	T	M	PUT	54.9	27.08	ccRCC	pT2a	G2	N0M0	1.53769	1.07794	2.42902	36.8166	1.238	1.15258	1.31299	4.47739	0.125952	0.623821	1.26546	4.22937	1.13858	3.96422	8.05752	1.95502	3.2212	4.49942	14.712	5.42016	0.745013	13.6507	31.8566	3.10584	1.41652	6.08215	4.5702	9.44553	3.25061	5.02285	1.49916	11.8141	8.28577
KCS_025	T	M	PUT	61.5	24.69	ccRCC	pT1b	G2	N0M0	1.61197	0.902656	2.80323	35.4459	1.24039	1.05086	1.68838	5.31013	0.151324	0.699173	1.50624	3.71489	0.881722	4.17726	6.94151	1.80357	2.59136	5.51331	16.5972	4.77954	0.589347	13.992	28.5677	2.7538	1.67914	7.16322	3.61985	7.75366	2.7021	4.16324	1.82131	15.9953	9.78864
KCS_026	T	M	PUT	64.7	21.33	ccRCC	pT1a	G2	N0M0	2.48558	1.52808	2.89092	36.7706	1.01538	1.19843	1.43978	4.20218	0.0665793	0.630007	1.08191	3.32965	1.29555	4.51128	7.02352	2.49455	3.33835	5.38742	14.0358	4.68416	0.590221	9.96654	37.149	1.30123	1.87667	8.22974	2.78402	7.2011	1.55011	6.80295	1.00799	13.1452	8.98543
KCS_027	T	F	PU	62.9	26.67	ccRCC	pT1b	G2	N0M0	1.50186	1.09639	3.25348	38.4519	1.06572	1.22085	1.93819	6.45947	0.123863	0.645982	1.57051	3.32596	0.823646	3.98117	5.68911	1.9348	2.21616	5.96531	15.1337	3.12349	0.478498	20.3649	31.027	3.30786	3.10849	5.39588	3.06537	6.77137	2.4393	4.17788	3.27351	11.3935	5.67493
KCS_028	T	M	PUT	54.9	22.64	ccRCC	pT1b	G2	N0M0	2.02113	1.21564	2.99147	37.4712	1.39312	1.10974	1.53379	5.06734	0.108267	0.568403	1.30823	3.46002	1.06771	4.29252	7.49143	2.03481	3.0596	4.67306	13.8043	4.94613	0.382086	14.1838	27.4601	2.94706	2.89489	9.13169	2.579	5.97592	2.67815	7.15892	2.20941	12.8923	9.8888
KCS_029	T	F	PU	72.8	20.7	ccRCC	pT2a	G3	N0M0	2.17767	1.33478	3.50589	38.0346	1.41458	1.17293	1.85205	4.78608	0.0756726	0.605381	1.70263	3.58988	0.990499	4.4023	5.77782	2.17761	2.1884	5.5628	14.9814	3.22295	0.444074	15.4174	25.5112	3.48671	2.3042	6.80901	3.52283	7.26883	2.77196	5.14812	2.54239	15.5361	9.68131
KCS_030	T	F	PUT	69.9	26.81	ccRCC	pT1a	G2	N0M0	1.7476	1.06947	2.85592	33.1236	1.53619	0.992656	1.93127	6.30664	0.276767	0.776212	1.58974	4.50934	1.38453	4.41643	7.89557	2.05949	3.23811	4.516	14.4764	4.77553	0.522467	14.9789	31.7406	3.33103	1.58711	8.17745	1.26253	5.94489	2.62501	5.45895	1.14824	14.1781	9.56719
KCS_031	T	M	PUT	32.8	24.8	ccRCC	pT3a	G3	N0M0	1.5679	0.97477	2.2133	32.7785	1.09272	1.00647	1.71484	7.09765	0.307627	0.647912	1.21615	4.24707	0.905237	3.90555	8.72586	1.5481	2.54854	4.26247	16.9631	5.68939	0.586856	16.4618	30.2219	2.97221	1.34269	7.36284	3.92545	8.43454	2.70054	3.36278	1.64259	14.0174	7.55523
KCS_032	T	F	PUT	68.2	19.2	ccRCC	pT1b	G1-2	N0M0	1.60138	1.27526	2.66829	37.0088	1.4645	1.18478	1.70299	5.5343	0.231649	0.732855	1.38021	3.60528	1.05705	4.11628	6.68416	1.93219	2.8146	5.05929	15.1083	4.1392	0.698642	14.8734	27.8232	3.48795	1.20171	6.27312	4.36336	10.1018	3.62608	5.31801	1.60856	12.7514	8.57141
KCS_033	T	M	PUT	71.1	24.84	ccRCC	pT1b	G4 (sarcomatoid)	N0M0	2.11802	1.28563	2.58707	31.4814	0.936454	1.21034	2.1443	6.69672	0.163359	0.764819	1.51479	4.94483	1.4139	4.79528	7.57017	2.30073	3.06503	4.87217	14.915	4.45662	0.763324	16.607	28.2361	2.89808	1.51179	7.24473	3.23713	9.03305	2.96821	5.05705	1.83321	12.7572	8.61643
KCS_034	T	M	PUT	48.1	27.77	ccRCC	pT3a	G2	N0M0	1.23224	0.717188	2.68654	33.0081	1.1288	0.930818	2.02717	6.18315	0.118894	0.594472	1.41578	3.13068	0.564854	4.108	5.73921	1.52452	1.87514	7.10678	20.7003	4.59055	0.616851	15.798	28.7193	2.28631	1.45283	5.68416	3.48809	8.62066	2.70896	3.62833	2.66562	16.7836	8.16418
KCS_035	T	M	PU	51.8	37.01	ccRCC	pT3a	G4 (sarcomatoid)	N1M1	1.05233	1.16553	4.16878	35.8482	0.999763	1.27004	3.69371	9.46508	0.545859	0.660284	1.51082	2.60225	0.434551	3.32588	3.82389	1.46411	1.16042	7.1	16.8703	2.24207	0.596149	17.6922	36.4197	2.83494	2.83494	2.83494	5.41446	12.315	2.83494	2.83494	2.83494	8.31417	2.83494
KCS_036	T	M	PUT	75.1	24.91	papRCC	pT3a	G3	N0M0	1.37689	0.890989	3.00301	36.9243	1.22599	1.20202	1.62578	4.98876	0.219636	0.575837	1.16426	3.22851	0.725715	4.57925	7.13171	1.69814	2.32415	5.68293	15.8764	5.00675	0.54902	15.9623	33.131	1.74754	1.31817	6.6076	2.99218	7.9516	1.63631	3.32959	2.43399	14.1681	8.72167
KCS_037	T	F	PUT	59.7	31.64	ccRCC	pT3b	G3	N0M0	1.89889	1.53997	3.23297	35.1709	0.869487	1.57818	2.75002	7.59576	0.249394	0.929345	1.73517	3.53479	1.11235	4.31931	5.77147	2.20346	2.18153	5.22246	14.5312	2.58087	0.992464	14.055	32.1365	3.41944	1.76832	5.63673	7.22075	11.4509	3.02249	3.16349	1.4064	10.3865	6.3334
KCS_038	T	M	PU	66.3	32.51	ccRCC	pT1b	G2	N0M0	1.63708	0.929227	2.79176	34.8247	1.29343	1.10555	2.04315	7.30536	0.50585	0.616229	1.35448	4.54277	0.922052	3.8519	8.49246	1.54649	2.82838	3.68301	14.1225	5.31909	0.284518	21.4533	30.437	3.27255	1.60768	8.74915	0.800992	5.2961	1.83341	3.71537	0.874163	12.0395	9.92074
KCS_039	T	F	PU	73	28.01	ccRCC	pT1a	G2	N0M0	1.59874	0.886258	4.01877	30.1462	0.995567	0.970149	3.08609	6.38792	0.307228	0.655212	1.76654	3.6209	1.08182	5.7333	8.6025	2.22322	3.21738	6.12263	13.5413	4.77465	0.263617	13.8437	32.8042	2.83931	2.63929	9.2205	2.07089	6.0143	2.05624	5.16752	1.33253	12.0347	9.97687
KCS_040	T	M	PUT	50.4	27.47	ccRCC	pT3a	G2-3	N0M0	1.87489	1.4213	2.64542	29.6622	1.0233	1.18414	1.87627	5.10532	0.0858916	0.812218	1.50102	3.73102	1.46046	5.27155	7.60195	2.96399	3.70767	5.87883	16.7914	4.50619	0.89506	15.092	28.3789	1.55165	1.4237	8.19312	2.77838	6.56719	1.65151	6.20309	1.25751	15.7768	11.1261
KCS_041	T	F	PUT	72.6	31.25	ccRCC	pT1a	G2	N0M0	2.09822	1.23137	3.63369	33.6382	1.22272	1.00981	2.33728	5.90435	0.153637	0.608946	1.67282	3.89645	0.998553	4.82478	6.23601	2.1502	2.39722	6.30539	15.3741	3.75376	0.552507	14.7885	32.3158	2.1882	1.48402	7.18694	1.40794	6.74023	1.99297	5.15185	1.2776	15.397	10.069
KCS_042	T	M	PUT	74.9	30.04	oncocytic adenoma	n.d.	n.d.	n.d.	1.06881	0.888244	2.77554	34.7741	1.66073	0.989696	2.3549	6.48034	0.521546	0.515778	1.33654	3.40734	0.656855	4.0004	5.97284	1.79141	2.46343	5.75007	17.6663	4.51403	0.411042	29.2281	31.9975	2.35452	1.18202	3.74642	1.18202	6.13585	1.18202	2.73355	1.4995	12.1067	6.6518
KCS_043	T	M	PUT	50.2	33.21	ccRCC	pT3a	G2	N1M1	1.27984	0.709855	3.05105	35.3368	1.23039	0.922977	2.02339	6.27046	0.185029	0.574171	1.38163	3.80971	0.570022	3.75536	7.42467	1.37903	2.29661	5.1108	17.2444	5.09004	0.353766	8.34675	21.8539	2.69402	1.30968	7.29286	2.85635	12.4612	10.3041	4.40807	1.19333	14.831	12.4487
KCS_044	T	M	PUT	69.4	32.11	ccRCC	pT1a	G1	N0M0	1.80182	0.965707	3.323	36.5963	1.31345	1.02236	1.88879	5.26423	0.126412	0.30339	1.28151	4.16121	0.823513	4.62562	8.13768	1.66217	2.58995	5.02356	14.0214	4.81729	0.250666	17.3964	42.0366	1.67461	1.67461	4.75779	1.67461	2.762	1.67461	1.77905	1.67461	13.8051	9.08997
KCS_045	T	M	PUT	80.9	23.66	ccRCC	pT3a	G3	N0M0	1.82372	1.10265	2.86763	37.0116	1.17542	1.11935	1.89585	6.13218	0.180153	0.675278	1.34566	3.99092	0.959877	4.16428	6.99603	1.89279	2.65559	4.89951	14.5255	4.2148	0.371138	16.3693	33.0415	1.03742	1.25996	8.37734	1.0905	6.56251	1.03742	4.98966	1.03742	14.7037	10.4933
KCS_046	T	F	PUT	67.1	UNK	ccRCC	pT3a	G3	N0M0	1.83568	0.85986	4.07295	37.3484	0.908406	0.88845	1.94659	5.0455	0.167632	0.23678	1.31172	2.81493	0.418902	4.52473	6.24289	1.78731	2.39904	6.73138	15.725	4.3732	0.360674	13.1906	44.239	2.98707	2.98707	2.98707	2.98707	7.84603	2.98707	2.98707	2.98707	8.84982	4.96503
KCS_047	T	M	PUT	44.7	35.65	ccRCC	pT1b	G1	N0M0	2.33196	1.53667	2.96919	30.6875	1.10616	0.137218	1.76692	4.99452	0.11386	0.902259	1.32519	5.04576	1.56164	5.29917	11.6699	2.00051	3.45699	3.63529	12.492	6.30088	0.666416	12.8841	32.7957	3.79058	2.24157	10.8274	0.64741	3.40144	2.36004	5.74779	0.667678	13.0346	11.6017
KCS_048	T	F	PUT	64	29.74	ccRCC	pT3a	G3	N0M0	1.74824	1.02482	3.75894	31.1455	1.4024	1.12458	2.62078	6.20134	0.445039	0.787924	1.77641	3.83742	0.901788	4.87482	7.18486	1.91029	2.42866	6.17407	15.8312	4.18038	0.640491	15.1585	26.4827	3.75058	1.73822	7.34373	5.21863	8.9308	2.74146	4.97181	1.7859	13.334	8.54362
KCS_049	T	M	PUT	70.7	31.02	ccRCC	pT3a	G3	N0M0	2.26529	1.6484	2.51209	33.5733	1.49713	1.48688	1.98376	6.82473	0.373277	0.811543	1.30528	3.5124	1.06532	4.05477	6.20429	2.20235	2.90188	4.70718	15.9689	4.10622	0.995055	18.7956	43.3187	1.72337	1.72337	2.39596	1.9133	6.67854	1.72337	1.72337	1.72337	12.9095	5.37147
KCS_050	T	F	PUT	78	27.48	ccRCC	pT1b	G2	N0M0	1.43049	0.733246	5.05116	36.3002	1.35247	0.932904	3.69186	8.7599	0.818593	0.539196	1.61037	2.71895	0.276087	3.45409	4.27819	0.994289	0.962486	7.30892	16.0674	2.21509	0.504209	12.1082	39.3074	2.43116	2.43116	2.43116	7.33037	8.86215	2.43116	2.43116	2.43116	14.6618	3.14308
KCS_051	T	M	PUT	59.2	24.78	ccRCC	pT3a	G4 (sarcomatoid)	NxM0	1.52274	1.48879	2.68987	34.3104	0.865877	1.54591	2.93622	10.036	0.396001	1.01652	1.54203	3.83255	0.923956	4.01145	5.75656	1.7924	1.89902	4.67309	15.1655	2.59037	1.00477	18.8891	42.2442	2.79464	2.79464	2.79464	2.79464	7.03879	2.79464	2.79464	2.79464	9.47073	2.79464
KCS_052	T	M	PUT	77	24.76	ccRCC	pT3a	G3	N0M0	1.83951	1.57685	2.53706	39.7573	1.30811	1.45558	1.7865	7.33208	0.233177	0.752376	1.01244	3.47873	0.711132	3.31379	5.69899	1.85696	2.12912	4.35388	15.111	3.07578	0.679685	12.415	36.7326	4.59939	4.59939	4.59939	4.59939	9.45792	4.59939	4.59939	4.59939	4.59939	4.59939
KCS_053	T	M	PUT	58.3	23.67	ccRCC	pT1a	G3	N0M0	1.07993	0.906075	2.74177	38.4682	1.32395	1.18262	1.96232	5.35108	0.167653	0.635134	1.1687	2.82077	0.631038	3.91446	5.85687	1.6638	2.11306	6.20624	17.5365	3.77116	0.498638	13.8836	36.024	1.96253	1.8841	7.27067	2.47646	5.65897	1.1338	4.87868	2.11394	15.7161	6.99708
KCS_054	T	M	PU	67.9	35.64	ccRCC	pT1a	G2	N0M0	1.49648	0.921202	3.5914	33.5227	1.3351	1.07158	2.35546	6.24122	0.519727	0.626462	1.50021	3.65267	0.746192	3.9966	5.76251	1.66172	2.25186	6.13756	17.8717	4.04695	0.690648	16.7181	35.6208	1.51511	1.51511	7.38616	1.51511	4.00225	1.51511	2.65144	1.51511	16.2164	9.82928
KCS_055	T	M	PUT	40.5	27.45	ccRCC	pT1b	G1	N0M0	1.74742	1.02779	2.89603	32.2364	0.936431	0.98029	2.11489	6.34886	0.257514	0.604198	1.6024	4.51764	1.07541	4.99499	7.45403	2.00401	2.73886	5.42697	16.3676	4.04794	0.62034	16.6339	30.4683	2.11643	1.24496	9.45601	1.24496	4.44896	1.24496	5.8416	1.24496	16.1767	9.87823
KCS_056	T	F	PUT	44.4	21.45	ccRCC	pT1b	G1	N0M0	1.56758	1.30668	2.17441	32.708	1.11644	1.16956	1.97388	7.23806	0.302935	0.779709	1.29569	4.15628	1.22878	4.66528	7.61807	2.24204	3.09596	4.92281	15.1355	4.7122	0.590148	14.4457	27.6007	4.48036	2.44791	7.10299	2.34924	9.49666	5.02033	5.74661	1.77489	11.7555	7.77913
KCS_057	T	M	PUT	77.2	31.14	ccRCC	pT1b	G2	N0M0	1.61986	1.04342	2.70995	34.9711	1.34131	1.09972	2.40343	7.72921	0.383545	0.65594	1.30409	3.59568	0.848126	3.83276	6.64232	1.79625	2.64174	4.87102	15.5949	4.1858	0.729894	12.483	22.3969	2.53208	1.18548	4.39752	9.08055	19.8998	5.67203	2.38884	1.18548	10.1564	8.62187
KCS_058	T	M	PUT	64.1	29.07	ccRCC	pT2b	G3	N0M0	1.58531	1.11757	2.14575	31.2854	1.18383	1.14957	2.09637	7.16478	0.296905	0.815824	1.46477	4.39007	1.10932	4.17376	8.37802	1.83942	2.87478	5.09457	15.8803	5.24794	0.705738	9.94203	17.0074	6.12007	1.2948	5.537	8.73973	20.9518	9.3031	3.09773	1.34861	9.92981	6.7279
KCS_059	T	F	PUT	66.6	30.12	chRCC	pT2a	Gx	N0M0	1.88073	1.1685	2.88248	34.4061	1.47853	1.03457	2.03289	6.48791	0.257547	0.708551	1.25192	4.25675	1.30011	4.36024	8.23485	2.11574	3.26185	4.82432	12.8237	4.82577	0.406949	18.7166	27.5254	3.45083	1.66552	8.20892	1.83075	5.89324	2.37559	4.5435	1.28547	13.3649	11.1392
KCS_060	T	F	PUT	79.9	24.34	ccRCC	pT3a	G4	N0M0	1.24902	1.18557	3.18582	47.029	1.06118	1.0737	2.56816	9.29991	0.13005	0.482002	1.09132	2.38525	0.383375	2.64144	3.84016	1.34501	1.30303	4.55766	13.1715	1.78112	0.235723	23.9118	42.259	2.22295	2.22295	2.22295	5.30084	5.531	2.22295	2.22295	2.22295	7.21895	2.4408
KCS_061	T	M	PUT	62.7	23.41	ccRCC	pT3a	G3	NxM1	1.70911	1.44633	2.54882	39.5971	0.883361	1.14302	2.10603	9.14021	0.259884	0.741433	1.18901	3.7106	0.856368	3.40223	6.11496	1.69193	1.93881	4.15528	14.0136	2.77332	0.578591	15.7934	24.7434	1.07907	1.80467	3.45396	11.5739	17.2435	1.75085	1.4041	3.78529	13.9632	3.40466
KCS_062	T	M	PUT	67.9	33.9	chRCC	pT2a	Gx	N0M0	1.56856	0.646147	2.9055	36.4864	1.27239	0.784724	1.8728	5.72051	0.19343	0.477399	1.39241	3.59062	0.558254	4.05003	7.51115	1.34033	2.25779	5.43122	16.6091	5.07595	0.255341	20.4832	29.633	2.4365	1.01501	7.64138	1.18014	3.87929	1.10265	3.19554	1.01501	17.4864	10.9318
KCS_063	T	M	PUT	53.2	30.74	eosinophilic granular cell subform + ccRCC residuum	pT1b	G3	N0M0	1.2026	0.80676	2.47892	37.4393	1.03502	0.85894	1.53969	6.86033	0.166499	0.421145	1.01858	3.12609	0.466562	3.26843	7.55578	1.34665	2.34999	4.83269	18.3492	4.49509	0.381694	19.4354	37.6184	3.49216	3.49216	3.49216	3.49216	6.23173	3.49216	3.49216	3.49216	8.77725	3.49216
KCS_064	T	M	PUT	68.1	25.35	ccRCC	pT3a	G4 (sarcomatoid)	NxM1	2.18958	1.54434	2.20109	36.4539	1.2407	1.32635	1.70849	8.20503	0.495746	0.874183	0.979687	3.59407	0.921196	3.67878	6.79337	1.66765	2.18037	3.99626	15.124	3.9068	0.918469	20.3589	35.9085	1.12187	1.12187	6.9193	1.94262	5.86974	1.12187	3.4531	1.18114	14.0212	6.97988
KCS_065	T	M	PUT	47.3	30.09	ccRCC	pT2a	G3	N0M0	1.70823	0.921	3.20045	31.6119	1.37723	0.936005	2.68943	8.05037	0.652729	0.593901	1.38117	3.79817	0.729897	3.92401	7.31084	1.79319	2.71871	5.17393	16.3324	4.7162	0.380238	13.1117	26.3663	1.33368	1.33368	7.30172	2.23433	7.58686	1.3854	4.6117	1.45809	21.2713	12.0053
KCS_066	T	M	PUT	64.1	22.09	ccRCC	pT3a	G4	N0M1	2.65422	0.984527	3.24194	39.9745	1.53427	0.743176	1.46091	5.67737	0.133244	0.339096	1.06928	3.32476	0.499087	3.9722	6.11503	1.27981	1.67138	4.86952	16.1918	4.00659	0.257319	22.8885	34.1651	1.44909	0.95551	4.59416	1.8168	9.16137	1.98155	1.63134	1.14161	13.4199	6.79507
KCS_067	T	M	PUT	58.6	17.87	ccRCC	pT3a	G1-2	N0M0	1.93413	1.40038	2.53786	40.8543	1.51338	1.01921	1.49318	5.52136	0.399813	0.577656	0.903862	2.88858	0.702424	3.52792	4.53503	1.66315	1.7339	5.08016	17.8648	3.2401	0.608773	17.8145	27.1331	1.98097	1.69466	3.80244	6.75299	13.0791	2.84904	2.44317	2.08616	14.7213	5.64264
KCS_068	T	F	PUT	58.6	23.8	ccRCC	pT1a	G1	N0M0	2.79822	1.51068	2.45581	31.583	1.55079	1.11139	1.69838	6.70457	0.491818	0.695359	1.34912	4.67721	1.58673	4.72331	7.21375	2.22755	3.19536	4.6916	14.4157	4.46903	0.850654	17.4821	39.608	1.5724	1.07015	4.33962	2.06866	6.98774	1.38316	3.76684	1.07015	12.211	8.4402
KCS_069	T	M	PUT	59.9	24.54	ccRCC	pT3a	G2	N0M0	1.67143	0.960814	2.54261	34.5329	1.04293	1.00043	2.08503	7.65546	0.339289	0.641302	1.2826	4.21277	0.899951	3.71717	7.23846	1.57479	2.35299	4.67799	15.8851	5.12038	0.565626	16.0459	25.8721	4.04421	1.53939	6.577	3.90088	10.7295	3.68264	4.47807	1.3555	13.6699	8.10495
KCS_070	T	M	PU	56.1	26.6	ccRCC	pT1b	G2	N0M0	2.14453	1.0964	3.22374	31.7415	1.14833	1.10928	2.0243	5.85085	0.205068	0.656061	1.47376	4.05833	1.11386	4.44094	8.35353	2.13409	3.2185	4.78396	14.8353	5.72785	0.659826	17.0352	31.5793	4.30359	0.8451	7.89675	1.49832	5.63536	3.17829	4.87469	0.906318	12.7406	9.50648
KCS_071	T	M	PU	61.7	22.09	ccRCC	pT3a	G3	N0M0	1.30717	0.933401	2.87516	33.8516	1.16695	1.04097	2.36191	6.77779	0.318633	0.749501	1.66556	3.66565	0.637214	4.18239	6.15386	1.60482	1.8052	6.16328	17.7926	4.26534	0.681034	15.7026	24.6839	1.86018	1.45789	4.53655	10.0254	13.5313	2.86782	3.27372	2.12881	13.1429	6.7889
KCS_072	T	F	PUT	57.1	24.03	chRCC	pT2b	G3-4	N0M0	1.44895	1.16881	3.20475	36.4215	1.11679	1.26234	2.91041	7.90581	0.0899295	0.736066	1.8135	3.37808	0.727083	4.01935	6.29668	1.7223	2.20768	5.47477	14.0312	3.62064	0.443361	18.2361	37.0285	1.17723	1.17723	6.34512	1.31733	5.23432	1.36565	4.10828	1.17723	13.6717	9.1613
KCS_073	T	M	PUT	69	29.64	papRCC	pT2a	Gx	N0M0	1.46985	1.13977	2.89196	32.6042	1.1466	1.28434	2.50735	7.72285	0.374998	0.951364	1.98201	4.20885	1.10775	4.63118	7.30859	2.02186	2.54553	5.51289	14.5931	3.38824	0.606643	15.8826	36.4092	2.55322	2.58866	8.66832	1.49286	4.48119	1.67196	4.68632	1.89912	11.6227	8.04388
KCS_074	T	M	PUT	71.9	21.72	ccRCC	pT3a	G3	N1M0	1.00129	1.07888	1.51221	41.6589	1.13236	1.14301	1.35177	8.71389	0.243604	0.642944	0.714382	3.3213	0.444804	2.46938	6.06272	1.08833	1.52551	3.60256	18.3455	3.28265	0.66401	18.7516	44.1292	1.94329	1.94329	1.94329	1.94329	6.4053	1.94329	1.94329	1.94329	12.5217	4.58911
KCS_075	T	M	PUT	75.7	26.23	ccRCC	pT2a	G3	N0M0	1.72114	1.25237	2.81752	35.3909	1.36648	1.13951	1.84976	5.56382	0.130685	0.594457	1.40247	3.75743	1.07107	4.28933	7.92849	2.08145	2.98226	4.90543	14.3605	4.86362	0.531341	15.2761	27.721	3.74849	0.854271	6.24628	4.01424	11.4398	5.80515	4.37955	0.618791	10.7506	9.14573
KCS_076	T	M	PUT	61.1	27.64	ccRCC	pT3a	G3	N0M0	1.4208	1.11449	3.2152	37.4579	1.58419	1.23843	2.57337	6.60225	0.10769	0.705367	1.46458	3.14721	0.610306	3.65312	6.38396	1.67968	2.22437	5.51209	14.9976	3.83375	0.47358	13.7412	22.0056	4.94441	1.00741	6.62644	5.1139	14.2317	6.55768	5.00584	1.09222	11.3026	8.37098
KCS_077	T	M	PUT	69.9	25.15	ccRCC	pT1b	G2	N0M0	2.30896	1.27231	3.32067	40.7581	1.29713	1.11579	2.00752	5.65579	0.107403	0.602526	1.484	3.476	0.830948	3.83581	6.71317	1.65502	2.1643	4.52565	12.4675	4.06683	0.334525	16.4262	37.1535	2.13762	0.962454	7.89336	0.990579	4.68249	2.17378	5.64942	0.528664	10.8966	10.5054
KCS_078	T	M	PUT	55.3	28.53	ccRCC	pT3a	G4 (sarcomatoid)	N2M0	1.89474	1.00756	3.36334	31.7229	0.815789	0.99532	1.79586	5.04551	0.103799	0.599729	1.38399	3.85194	0.945974	4.6469	7.61668	1.82845	2.35148	6.65521	17.8695	5.13327	0.37205	21.164	30.7564	1.9707	2.30266	6.61424	1.31759	5.06739	1.01142	2.88526	1.73418	16.0265	9.14968
KCS_079	T	F	PU	73.3	36.39	ccRCC	pT3a	G4 (sarcomatoid)	N0M1	2.09034	1.82713	3.48746	36.537	1.45695	1.68128	3.06383	10.3364	1.03872	0.997288	1.42348	3.17644	0.975875	3.45351	5.66405	1.79601	2.16309	4.19243	11.551	2.41938	0.668261	22.2828	34.3037	1.54532	1.06023	6.38364	2.31771	6.31982	1.11278	5.96735	1.06023	10.764	6.88243
KCS_080	T	M	PU	73.5	29.3	ccRCC	pT2a	G3	N0M0	1.82557	1.56265	3.33208	39.9478	1.30396	1.52768	2.63236	7.83199	0.375801	0.763842	1.52768	3.494	0.99465	3.62006	6.59793	1.8242	2.61913	3.9535	10.77	3.27516	0.219939	14.4578	35.6431	1.65895	2.46165	10.537	0.488245	2.86212	0.753273	7.25094	1.19559	12.551	10.1404
KCS_081	T	M	PU	50.5	34.48	ccRCC	pT1b	G1	N0M0	1.94954	0.956992	3.82237	32.4319	1.07452	0.896916	2.84091	6.94893	0.299996	0.544056	1.64771	3.87095	0.764123	4.34385	8.03966	1.79787	2.66899	5.33865	14.3044	5.33129	0.126335	14.0592	31.2319	1.90506	1.90506	8.78084	1.90506	2.33866	1.90506	4.19476	1.90506	18.3934	11.4759
KCS_082	T	F	PU	70.7	44.82	ccRCC	pT3a	G3	N0M0	2.2761	1.40841	3.72729	35.1553	1.09714	1.14065	2.56503	7.15158	0.312046	0.722757	1.69024	4.06777	1.07383	4.54942	7.42716	1.92233	2.47017	4.73672	12.2754	3.82942	0.401265	20.6814	31.3242	3.63679	2.54736	8.34928	1.58622	5.28706	1.59805	4.41841	0.941322	11.4697	8.1603
KCS_083	T	F	PU	73.1	21.09	ccRCC	pT3b	G3	N1M0	2.02053	1.5812	3.07217	35.6166	1.61973	1.28493	2.44853	7.89727	0.685136	0.803078	1.42769	3.49055	0.911731	3.88553	6.21122	1.77973	2.02055	5.11825	13.9058	3.53208	0.687738	16.919	28.3901	2.69117	1.03521	4.32828	10.5082	15.1019	3.62794	2.54188	0.971087	8.82295	5.06235
KCS_084	T	M	PU	72.7	31.31	ccRCC	pT3a	G3	N1M1	2.26954	1.37244	2.8512	31.1623	1.3411	1.26087	2.03616	7.04012	0.461772	0.83007	1.52355	4.47506	1.40844	4.88314	7.10018	2.31116	2.87715	5.17282	14.1289	4.55453	0.939546	20.2704	28.728	3.10884	0.953644	6.02107	2.02943	8.44298	3.31654	3.76272	0.953644	12.8069	9.60586
KCS_085	T	M	PU	70.4	24.11	ccRCC	pT3a	G3	N2M1	1.52941	1.08593	2.51226	36.9734	1.26862	1.1235	1.87739	6.82466	0.20956	0.669317	1.31473	3.64655	0.83052	3.88591	6.71926	1.71288	2.32273	4.88564	15.9098	3.9979	0.700094	18.5889	34.7546	1.56968	0.848462	6.02316	1.38857	7.37535	1.91573	3.2734	0.848462	14.6036	8.81005
KCS_086	T	F	PU	75.3	30.86	ccRCC	pT1a	G2	N0M0	2.27985	1.45173	3.22886	32.919	1.22245	1.22237	2.45269	6.31726	0.186194	0.679093	1.67161	3.85672	1.30182	4.90288	7.2379	2.45065	3.09278	5.3339	13.2594	4.52292	0.409901	19.8415	28.5196	2.80467	1.38371	6.61552	2.38172	7.73477	2.24194	3.78343	1.87571	14.0298	8.78754
KCS_087	T	M	PU	40.6	36.57	ccRCC	pT3a	G3	N0M0	1.36766	0.993637	3.15701	33.9777	0.981579	1.03122	2.03324	6.26201	0.179729	0.589266	1.39697	4.01691	0.977453	4.33545	9.05035	1.85801	2.94168	4.58415	14.4601	5.54242	0.263529	15.2432	35.6754	1.94984	1.85439	7.48604	1.98677	5.80619	1.85439	1.85439	1.85439	15.1892	9.24583
KCS_088	T	F	PU	78.8	23.81	ccRCC	pT1a	G2	N0M0	2.14377	1.48686	3.55042	35.7277	1.27666	1.13808	2.20715	5.56655	0.0812913	0.545668	1.58518	4.02553	1.35146	4.70126	6.86343	2.31562	2.98486	5.06006	12.4751	4.46322	0.45009	22.2575	31.3207	2.3832	1.02551	6.25484	1.27451	7.3066	2.05989	3.17739	1.02551	11.9431	9.97114
KCS_089	T	M	PU	65.3	25.14	ccRCC	pT1b	G3	N0M0	1.33551	1.37504	3.07216	35.3415	1.11866	1.41227	2.67976	7.94112	0.403593	0.871775	1.65637	3.37289	0.77368	3.68737	5.90075	1.97967	2.22709	5.18799	15.7127	3.09801	0.852056	17.96	38.5318	1.41373	1.41373	4.81419	1.81586	7.26038	1.41373	2.11059	1.41373	17.3292	4.52314
KCS_090	T	M	PU	76.3	34.95	ccRCC	pT3a	G3	N0M0	2.68942	1.87644	3.25894	34.0063	1.17501	1.33171	2.3211	7.04696	0.370292	0.743528	1.42812	3.81555	1.23549	4.40973	6.6769	2.36852	2.75199	4.72183	13.2447	3.80357	0.723914	20.4383	45.0502	2.32507	2.32507	3.92335	2.32507	2.32507	2.32507	2.32507	2.32507	10.8148	3.49783
KCS_091	T	F	PU	68.2	34.53	ccRCC	pT2a	G1	N0M0	0.864026	0.421694	3.89643	33.3303	0.315212	0.498035	2.70074	6.91591	0.25217	0.25217	1.53508	3.86022	0.413978	4.90752	7.69124	1.6374	2.18961	6.96883	16.8998	4.19744	0.25217	8.91821	39.1056	2.50518	2.50518	7.22469	2.50518	2.50518	2.50518	2.50518	2.50518	20.2995	6.91563
KCS_092	T	F	PU	61.7	34.21	ccRCC	pT2a	G1-2	N0M0	1.9344	1.11616	4.19562	32.5006	1.17462	1.11999	3.47038	7.79776	0.4423	0.695324	1.86664	3.69937	0.942104	4.51994	6.67561	1.8987	2.23386	5.953	14.1009	3.30666	0.355999	20.9418	29.4237	3.60269	1.33367	7.73071	1.50054	5.43083	1.4988	3.62275	0.79034	15.8296	8.29449
KCS_093	T	M	PU	77.3	20.42	ccRCC	pT3a	G2	N0M0	2.15205	0.881951	4.09485	44.4438	1.13116	0.95304	1.58519	4.10267	0.0754883	0.307615	0.924731	2.20332	0.213189	3.26268	4.43408	1.13194	1.03276	6.56681	17.0596	3.10799	0.335094	21.9997	35.6615	1.30611	1.30611	5.35723	1.32316	6.39348	1.30611	2.63305	1.30611	12.8194	8.58804
KCS_094	T	M	PU	36.1	24.06	ccRCC	pT1b	G2	N0M0	1.57131	0.839281	2.58994	35.247	0.982591	0.792773	1.74961	5.39662	0.148878	0.277284	1.1538	3.76249	0.613524	4.17688	7.33086	1.71596	2.72752	5.57878	18.3633	4.83275	0.148878	10.4548	31.9157	1.27732	1.27732	6.74691	1.27732	6.88659	1.27732	3.9955	1.27732	23.7373	9.87661
KCS_095	T	M	PU	55.7	26.12	ccRCC	pT2b	G2	N0M0	2.2753	1.0499	2.66213	35.5553	1.35867	1.05099	1.63072	5.48671	0.221262	0.580812	1.01412	3.51948	0.772245	3.98066	7.61216	1.43069	2.27657	4.90652	16.1073	6.04916	0.459277	15.2979	30.209	3.39179	1.6797	7.1163	3.87594	8.86749	3.30814	4.37253	1.08434	12.126	8.67083
KCS_096	T	M	PU	82	26.99	papRCC	pT3a	G1	N0M0	2.03636	1.29358	3.22075	36.6313	1.34401	1.1447	2.17626	6.71119	0.412219	0.706184	1.2586	3.46048	0.98149	3.98701	6.65267	2.0178	2.73331	4.84045	13.5224	4.20767	0.661554	24.6338	30.271	4.06811	1.41929	5.76925	1.67272	5.90039	2.69666	4.12729	1.07462	11.2435	7.12335
KCS_097	T	M	P	70	28.08	ccRCC	pT1a	G3	N0M0	2.26364	1.41945	3.57325	33.8254	0.987334	1.35463	2.75593	6.73655	0.194495	0.745666	1.67775	4.04092	1.14374	4.95379	6.22413	2.2442	2.28916	5.96858	13.1906	3.73127	0.679463	22.203	29.9985	4.44951	1.59512	7.82878	1.48552	5.34024	2.34978	4.55748	1.06655	10.6624	8.46313
KCS_098	T	M	P	77.8	32.11	ccRCC	pT3a	G2	N0M0	1.9828	1.26354	3.96875	36.5799	1.24589	1.03977	2.37764	5.9867	0.165066	0.513466	1.48905	3.73317	0.898873	4.57665	6.4558	1.84616	2.14179	5.93996	13.3965	4.00875	0.389767	20.4855	29.2128	4.0145	1.06385	6.84055	1.40267	5.56611	2.76322	3.83143	1.74177	13.4333	9.64435
KCS_099	T	M	P	72.2	32.14	ccRCC	pT3a	G4 (sarcomatoid)	N1M1	1.4711	0.981315	3.1627	33.3358	1.28928	1.08386	3.02075	8.53137	0.573815	0.807133	1.79107	4.06461	0.897086	3.97995	6.47239	1.97519	2.45212	5.15727	14.3909	3.94293	0.619354	23.676	35.1564	2.35142	2.35142	3.03527	2.35142	5.32362	2.35142	2.35142	2.35142	13.2074	5.49274
KCS_100	T	M	P	66	27.72	ccRCC	pT1a	G3	N0M0	1.6933	1.17647	2.54034	32.3144	1.44714	1.11352	1.76438	5.13828	0.159027	0.653213	1.29388	4.19786	1.04681	4.65546	7.30529	2.10506	2.54418	5.86021	17.3758	4.82747	0.787971	18.9107	29.0202	3.23176	0.823011	7.01986	1.36138	5.78138	1.67037	4.03109	0.698555	17.6231	9.82859
KCS_101	T	F	P	45.3	18.31	adult cystic nephroma/mcRCC	n.d.	n.d.	n.d.	2.0896	1.45775	3.35522	36.0883	1.4606	1.19892	2.15942	5.39213	0.0648066	0.729074	1.62016	3.67726	1.09468	4.748	6.49693	2.21272	2.56989	5.88442	13.5021	3.7485	0.449541	14.109	33.2431	3.10515	1.78152	7.6149	1.74779	5.77989	1.66011	5.6369	1.41887	14.2205	9.68229
KCS_102	T	M	P	72.7	29.94	ccRCC	pT1a	G1	N0M0	1.87544	1.10079	2.99597	38.1185	1.73696	0.984449	2.01937	6.25817	0.31075	0.503411	1.17463	3.85714	0.771122	3.7344	6.56351	1.61561	2.47724	4.28822	14.8497	4.26046	0.504206	22.7864	32.8447	2.49364	1.00364	6.24638	1.00364	3.94185	1.26886	3.356	1.00364	15.6475	8.40373
KCS_103	T	M	P	53.8	25.36	ccRCC	pT3a	G3	N1M1	1.65831	1.30788	2.66156	35.1868	1.06951	0.0590885	2.16195	6.18504	0.155846	0.738606	1.51414	3.71287	1.09062	4.61207	6.95661	2.30397	2.81839	5.68632	15.4824	3.94911	0.688866	24.3539	33.3288	1.88257	1.80991	3.97913	2.41222	7.79088	1.80991	3.06281	1.80991	11.0426	6.71743
KCS_104	T	M	P	55.3	31.48	papRCC	pT1a	G2	N0M0	2.47736	1.75241	2.47573	36.4479	1.49427	1.44992	2.07364	7.06778	0.448327	0.909618	1.28578	3.80361	1.34583	4.09902	6.52872	2.10641	2.8189	4.45625	12.7863	3.41462	0.757635	19.2659	35.4586	2.37706	1.17581	5.5112	1.17581	5.51239	1.20787	3.71112	1.17581	15.1402	8.28826
KCS_105	T	F	P	59.6	27.22	ccRCC	pT1a	G2	N0M0	1.36565	0.958438	3.91284	33.1262	1.08059	0.844328	3.13462	7.10489	0.255336	0.509142	1.95171	3.22119	0.689386	4.8018	7.01876	2.00066	2.33235	6.23982	14.8003	4.23039	0.421638	14.5951	32.2319	1.67212	1.67212	8.50882	1.67212	5.70029	1.67212	4.55766	1.67212	15.9164	10.1293
KCS_106	T	M	P	67.3	33.21	ccRCC	pTx	Gx	N0M0	2.11221	1.14382	3.25127	35.686	1.22657	0.889082	2.15776	6.51526	0.354249	0.503254	1.34201	3.38994	0.852126	3.81413	6.71132	1.73966	2.63138	4.81699	15.1868	5.08566	0.590516	25.1582	32.6219	2.5527	2.5527	4.4867	2.5527	2.89651	2.5527	2.5527	2.5527	13.7642	5.75633
KCS_107	T	F	P	81.7	29.38	ccRCC	pT1b	G2	N0M0	2.58642	1.7948	3.02332	35.5494	1.18356	1.23503	2.09414	6.30514	0.228902	0.875798	1.54592	3.98272	1.37425	4.68922	6.32084	2.56269	2.77275	5.27662	12.3771	3.38287	0.838494	15.8008	40.9564	1.42822	1.42822	5.45569	2.475	7.06566	1.42822	2.55644	1.42822	14.0316	5.94552
KCS_108	T	M	P	44.6	28.38	ccRCC	pT1a	G2	N0M0	1.74874	1.08963	3.15291	30.1038	1.00499	0.910795	2.12534	5.30234	0.24742	0.460463	1.47348	3.73738	1.05604	5.14058	7.99775	2.26024	2.90512	6.24848	16.8218	5.71416	0.498516	23.3405	27.3517	2.07756	1.58291	6.1565	1.58291	5.58886	1.84013	2.85322	1.58291	15.9838	10.059
KCS_109	T	F	P	60.8	UNK	ccRCC	pT1a	G2	N0M0	2.52907	1.01723	3.80505	39.7152	1.68994	0.676814	1.49747	4.99868	0.254047	0.274678	1.00781	2.85989	0.567052	4.02751	5.96371	1.46539	1.87477	5.79442	14.8859	4.8933	0.20207	33.6255	17.0328	4.82729	4.82729	4.82729	4.82729	5.89609	4.82729	4.82729	4.82729	4.82729	4.82729
KCS_110	T	M	P	52.3	31.31	ccRCC	pT1b	G2	NxMx	1.78004	1.49459	2.78243	32.7566	0.956779	1.20459	2.41833	6.66781	0.206132	0.76731	1.53462	4.06846	1.17406	4.3956	6.89302	2.41377	2.95659	5.19979	15.255	4.35017	0.724318	18.372	38.7244	1.58513	1.58513	4.46391	1.58513	3.32002	1.58513	3.38123	1.58513	15.3562	8.45654
KCS_111	T	M	PU	70	30.04	ccRCC	pT1a	G1	N0M0	1.84174	1.40951	1.95845	34.6607	1.20647	1.3838	1.53629	7.37869	0.273213	0.764204	0.762958	3.95424	1.20456	3.44132	8.47581	1.81826	3.53245	3.68344	14.5056	5.65695	0.551403	17.6474	36.2704	2.28694	1.13889	6.04578	1.6941	6.47988	1.68106	2.57739	1.39598	14.7182	8.06397
KCS_112	T	M	PU	65.5	26.73	ccRCC	pT1a	G1	N0M0	1.40412	0.958332	2.52187	38.2308	2.85131	1.09929	1.30736	5.48439	0.239779	0.540133	1.16271	3.36923	0.726104	4.06532	6.0207	1.99815	2.31282	5.94649	15.3366	4.05597	0.368569	14.5312	27.8589	2.61121	2.87074	7.59145	1.44793	5.82495	2.43384	5.73106	2.35019	16.7252	10.0233
KCS_113	T	F	PU	31.4	23.14	ccRCC	pT2a	Gx	N0M0	2.18396	1.52967	2.47607	36.6037	1.3891	1.3547	1.49404	5.56928	0.0998605	0.773339	1.2231	4.05679	1.32083	4.3202	6.99463	2.15489	2.93168	4.90382	13.9149	4.2033	0.502108	15.5647	29.8308	3.35456	2.46465	7.74078	1.87063	6.11314	2.85555	6.4056	2.25437	13.0968	8.44843
KCS_114	T	M	PU	66.7	24.09	papRCC	pT1b	G2	N0M0	1.54554	0.647255	2.33121	35.7846	2.13066	0.795705	1.37766	6.59094	0.747672	0.491577	0.839698	3.4758	0.513594	3.0548	8.0561	1.08568	2.474	4.00647	16.8033	6.90802	0.339729	34.4383	27.5661	4.13475	1.44292	2.60554	1.44292	6.9945	3.21412	1.44292	1.44292	8.34794	6.92706
KCS_115	T	M	PU	59.9	24.84	ccRCC	pT3a	G2	N0M0	1.37223	0.617617	1.05738	39.309	0.631589	1.144	0.51344	7.32785	0.497393	0.497393	0.497393	4.20009	0.497393	3.67992	10.0175	0.702707	2.789	3.89245	13.1649	7.09338	0.497393	17.2798	31.8235	2.19708	2.19708	6.98266	2.19708	3.10929	2.19708	5.28142	2.19708	13.4587	11.0792
KCS_116	T	M	PU	52.1	31.8	ccRCC	pT1b	G3	N0M0	1.70971	0.994957	2.08671	33.8073	1.32223	1.07191	1.3074	6.43817	0.194087	0.768978	0.962055	5.067	1.2784	3.43736	10.7144	1.41197	4.0235	2.88848	12.0481	8.19721	0.270085	13.805	32.6851	1.77019	1.19889	10.479	1.19889	1.98554	1.25088	5.21942	1.19889	15.4518	13.7563
KCS_117	T	M	PU	73	28.09	ccRCC	pT3a	G2	N0M0	2.14766	1.42287	2.79495	35.519	1.23523	1.15966	1.50587	4.75483	0.0622635	0.611739	1.17522	3.44066	0.992325	4.84655	5.70175	2.19195	2.32707	5.70927	18.0167	3.55293	0.831488	17.5178	23.3954	2.20457	2.79977	7.47266	2.32783	7.67161	2.0268	4.54172	1.99374	19.8043	8.24385
KCS_118	T	M	PU	77.7	24.68	ccRCC	pT3b	G4 (sarcomatoid)	N0M0	2.13422	1.66054	2.44489	36.5682	0.742653	1.64038	2.26099	8.95266	0.110213	0.961162	1.4097	4.31024	0.997845	3.55043	5.67236	1.93683	2.49031	4.07681	13.9535	3.40431	0.721741	24.5187	35.9661	1.79034	1.79034	4.41493	1.81762	6.97814	1.79034	3.25404	1.79034	10.3471	5.54202
KCS_119	T	M	PU	74.7	32.87	ccRCC	pT1a	G2	N0M0	2.44121	1.51147	2.95339	35.5111	1.17452	1.1709	2.05462	6.11789	0.168295	0.653754	1.31727	4.46583	1.39518	4.53537	7.865	1.99973	2.86686	3.80107	13.2015	4.38243	0.412624	15.6231	32.9863	1.25913	2.6727	8.45317	1.66265	3.87374	1.07793	5.02609	1.97707	15.7444	9.64367
KCS_120	T	M	PU	57.1	26.7	ccRCC	pT1b	G2	N0M0	1.72826	0.864849	2.53486	35.8812	1.47239	1.01545	1.29336	4.81689	0.19001	0.543505	1.11216	3.69922	0.95026	3.97253	8.99553	1.49955	3.08195	4.20114	15.4911	6.21762	0.438067	14.0446	30.5836	2.56201	1.58017	9.35627	1.58047	5.11555	2.35122	5.44842	1.17807	14.1694	12.0301
KCS_121	T	F	PU	38.7	26.42	mcRCC	pT1b	G1	N0M0	2.3798	1.61442	2.29549	36.2351	1.07201	1.33493	1.62235	6.09645	0.0889956	0.743113	1.15694	4.17135	1.44787	4.36845	7.4211	2.07988	3.11076	4.18468	13.2987	4.73208	0.54553	19.5059	35.0966	1.36738	0.979767	8.54645	0.979767	5.18574	1.28332	5.17577	0.979767	11.7502	9.14938
KCS_122	T	M	PU	76.2	20.02	papRCC	pT1b	G1-2	N0M0	3.07986	0.699759	2.93202	41.8243	2.80007	0.695523	1.1992	5.74017	0.728508	0.246005	0.764852	2.90628	0.178913	3.11474	4.80566	0.747463	1.26715	4.16529	16.5495	5.28575	0.268945	10.3916	27.1909	5.36229	5.36229	5.36229	5.36229	9.28615	5.36229	5.36229	5.36229	10.2331	5.36229
KCS_123	T	M	PU	75.8	30.12	papRCC	pT3a	Gx	N1M0	2.14022	1.22225	3.67052	36.1817	0.957744	1.10423	2.22632	5.63842	0.117548	0.655416	1.78102	3.54149	0.884084	4.5773	4.88511	2.27242	2.13199	6.60039	15.7182	3.02227	0.671355	21.2146	31.6	1.96232	1.52301	4.57706	2.46184	7.63087	2.21687	3.37128	2.58494	13.2039	7.65328
KCS_124	T	M	PU	69.8	30.61	ccRCC	pT1a	Gx	N0M0	1.48079	0.865843	2.83439	36.4218	1.11334	0.898027	1.99103	6.77904	0.266685	0.527371	1.23259	3.99943	0.804208	3.72659	7.43232	1.47919	2.53164	4.31094	16.5597	4.37201	0.373016	19.4799	30.9944	2.24174	0.942924	8.71397	1.55557	6.24661	0.942924	2.62287	0.942924	15.2844	10.0318
KCS_125	T	F	PU	66.5	20.28	papRCC	pT1b	Gx	N0M0	1.79249	1.26988	2.77163	33.7067	1.39596	1.17802	2.26506	6.8825	0.205868	0.603879	1.48682	4.0709	1.07506	4.57754	6.73628	2.14568	2.86484	4.96585	14.9656	4.44094	0.598493	16.1688	26.8431	2.63368	1.8365	6.91151	2.28678	7.38956	2.38263	4.91154	1.67205	16.6433	10.3206
KCS_126	T	F	PU	76.1	28.28	ccRCC	pT1b	G2	N0M0	1.7521	1.11947	2.79059	38.051	0.994375	0.988436	1.41868	5.0471	0.102164	0.521036	1.07017	3.82715	0.871015	4.09915	6.93329	1.80356	2.72464	4.73579	15.9088	5.01495	0.226557	22.8108	33.6031	3.06785	1.3705	6.94725	1.15722	5.42973	1.42735	3.30038	2.04886	11.5305	7.30656
KCS_127	T	M	PU	66	29.07	papRCC	pT2a	G2	N0M0	1.82673	1.19873	3.02463	36.0325	1.28434	1.05669	2.23838	7.9742	0.390972	0.700057	1.35134	4.78377	1.09641	3.90102	7.40683	1.62285	2.89699	3.53225	12.7513	4.55653	0.373557	15.9494	36.7106	1.43238	1.30391	8.77111	0.99737	4.05334	0.99737	4.84596	0.99737	13.6391	10.302
KCS_128	T	M	PU	75.3	31.02	collecting duct carcinoma (CDC)	pT3a	G4	N0M0	1.46759	0.856593	3.52031	37.6646	1.31886	0.944637	2.41632	6.84032	0.210229	0.555557	1.50305	3.32377	0.616326	3.83538	6.02351	1.67997	2.09641	5.3679	15.6802	3.62776	0.450755	24.0409	29.2331	3.04122	1.38026	2.43866	3.79076	10.9777	3.19224	1.38026	1.38026	13.185	5.95951
KCS_129	T	F	PU	63.3	26.3	ccRCC	pT1a	G2	N0M0	2.21415	1.39898	3.82156	38.0955	1.13347	1.18659	2.21613	5.2998	0.109587	0.574393	1.3336	3.27646	0.990979	4.66819	7.3969	1.87323	2.74872	4.76469	12.3329	4.28278	0.281432	15.1916	34.596	1.92677	1.40647	7.80394	1.40647	3.89746	2.24594	4.56309	1.40647	12.8494	12.7063
KCS_130	T	M	PU	83.6	27.45	papRCC	pT1a	G2	N0M0	2.29162	1.34372	3.76518	35.1906	1.17664	0.928508	1.74166	4.61173	0.150062	0.377031	1.208	3.06608	0.746887	4.35138	6.27446	2.01375	2.8563	5.96437	17.0645	4.60471	0.272779	14.7658	40.9336	1.6953	1.6953	4.40529	1.6953	2.53623	1.6953	3.19918	1.6953	18.4171	7.26645
KCS_131	T	F	PU	75.7	24.84	ccRCC	pT1a	G1-2	N0M0	1.6474	1.07773	2.91303	33.5301	1.04973	1.1859	2.22276	6.34322	0.235277	0.672219	1.54103	3.82981	1.05537	4.43443	7.20897	2.12377	2.97904	5.50331	15.4642	4.40236	0.580264	17.6429	29.5741	2.02971	1.07171	7.40867	1.67353	7.09074	1.59381	5.36879	0.902491	14.7261	10.9174
KCS_132	T	M	PU	70.1	23.66	ccRCC	pT1a	G2-3	N0M0	2.53835	1.92585	3.18042	38.122	1.25953	1.43636	1.91799	5.08714	0.172916	0.72654	1.30258	3.21968	0.98116	4.09851	5.00019	2.2119	2.15543	5.52179	15.0514	3.10493	0.985328	14.3704	35.4592	1.1117	1.1117	3.66862	4.37784	13.337	3.09887	1.91769	1.1117	13.7878	6.64749
KCS_133	T	M	PU	66.9	26.73	ccRCC	pT1a	G2	N0M0	1.19363	0.874725	2.95678	36.9703	1.12384	1.14843	2.28734	6.71356	0.171874	0.682808	1.71874	3.97796	0.685999	3.70511	6.45744	1.53742	1.90798	5.33175	16.0648	3.9983	0.491213	17.1517	29.9805	3.3247	1.92409	7.02109	1.57759	5.91259	2.95158	4.47179	2.60859	13.6766	9.39916
KCS_134	T	M	P	49.1	27.78	ccRCC	pT1a	G1	NxMx	1.6684	0.791069	2.77402	33.1705	1.13888	0.907054	1.6745	5.3422	0.175414	0.413796	1.08696	3.80329	0.811341	4.38269	8.85975	1.54432	2.57132	4.79476	16.1942	7.62935	0.266103	13.1031	26.619	3.12478	2.78214	8.16894	2.17105	6.3689	3.17942	4.38768	2.75978	15.8327	11.5026
KCS_135	T	M	P	47.8	26	mcRCC	pT1b	Gx	NxMx	1.90524	1.08797	2.58132	34.8429	1.00519	0.995503	1.5803	4.90196	0.0663669	0.582554	1.03975	3.84746	0.978767	4.31276	7.48599	2.05055	2.82227	5.37068	16.3115	5.7602	0.47082	14.4536	28.6583	3.03354	2.12283	7.89671	2.00903	5.81115	2.88765	5.80649	2.12821	14.716	10.4764
KCS_136	T	M	P	57.2	27.47	papRCC	pT1a	G2	NxMx	2.25133	1.72797	2.2942	31.9071	1.26557	1.61626	0.947849	7.05207	0.482132	0.938471	1.19916	4.90809	1.65169	4.35812	8.47643	2.39126	3.63559	3.9888	12.6265	5.38308	0.898302	22.4779	28.2287	5.80156	1.16997	4.71854	1.54246	5.89898	4.43823	3.80444	1.32532	12.4954	8.09846
KCS_137	T	M	P	55.1	29.03	ccRCC	pT3a	G4	NxMx	2.12279	1.3487	1.73592	39.502	1.08374	1.25498	1.01375	6.8934	0.118394	0.744404	0.636369	4.29204	1.03902	2.84036	8.81856	1.40563	3.4644	3.49798	11.6842	6.21745	0.285894	16.5594	31.304	2.34536	0.766334	6.82986	4.24677	10.8951	4.32008	3.67922	0.897418	10.1538	8.00271
KCS_138	T	M	P	59.9	26.04	ccRCC	pT4	G3	NxMx	1.00161	0.770977	1.9742	43.8563	1.47957	1.10332	1.5541	8.32707	0.213571	0.621798	1.1112	4.17722	0.489366	2.48616	5.35029	0.914956	1.47926	4.53243	15.3934	2.84146	0.321773	17.2304	33.7186	1.00385	1.00385	2.60888	9.18156	14.1088	3.05136	1.75028	1.49683	10.4248	4.42083
KCS_139	T	M	P	60.7	29.26	ccRCC	pT1a	G2	NxMx	1.98993	1.12912	2.57855	39.2774	1.2327	1.27654	1.78589	6.01127	0.0920032	0.540519	1.20754	4.07684	0.952308	3.74949	8.17205	1.4867	2.83605	3.51684	12.4975	5.31813	0.272642	15.6891	35.0924	2.04152	1.22695	8.44864	1.29023	3.21744	1.45771	3.82629	0.783111	15.8851	11.0415
KCS_140	T	M	P	52.5	22.7	ccRCC, mcRCC	pT1a	G1	NxMx	2.4027	1.30814	3.03624	39.3431	0.898952	1.13279	1.48124	4.9136	0.112856	0.574155	1.18217	3.82346	1.05885	4.18487	7.66235	1.828	2.75074	4.68002	12.5466	4.96632	0.112856	15.2053	32.1547	2.40771	2.15149	10.9732	0.477009	2.13347	1.00016	6.0004	1.97406	13.481	12.0415
KCS_141	T	M	P	60.2	32.95	mcRCC	pT1a	Gx	NxMx	1.62327	1.02141	2.78308	37.2111	1.15422	1.12373	1.7263	6.15603	0.159194	0.602922	1.31101	3.72584	1.03683	3.86662	7.47633	1.72109	2.95534	4.58791	14.3937	5.02573	0.338317	16.9379	39.6551	1.73462	0.945753	7.16496	1.18214	3.58526	1.20159	4.91356	1.32086	11.892	9.46625
KCS_142	T	M	P	59.8	30.93	chRCC	pT3a	Gx	NxMx	1.49642	0.916298	2.42144	32.9641	1.60135	1.03518	1.86811	7.12698	0.760074	0.669457	1.28932	3.61229	0.973289	3.53345	8.46418	1.67597	3.41711	4.11992	15.2077	6.29199	0.555405	16.7603	27.8142	2.8436	1.47153	9.21764	0.769138	4.93657	2.41319	7.37354	1.45482	14.9132	10.0323
KCS_143	T	M	P	53.7	31.46	ccRCC	pT1b	Gx	NxMx	2.5262	0.993338	2.95169	33.4408	1.58158	0.833982	1.59183	5.6382	0.493627	0.461192	1.20093	3.76622	1.03228	4.40696	7.91728	1.69139	2.95232	4.63012	15.0027	6.40033	0.487071	16.8762	31.1624	2.85718	1.41103	9.60248	1.12574	4.44122	1.38538	7.17362	0.746391	12.2711	10.9472

## Sheet:  Data S1E
Data S1E. Clinical data together with relative concentrations [% for classes - SM, SHexCer] of individual lipids measured in urine samples. Explanation of abbreviations is as follows: N - controls, T - RCC patients, UNK - unknown, QC - quality control, M - males, F - females, ccRCC - clear cell renal cell carcinoma, papRCC - papillary renal cell carcinoma, chRCC - chromosome renal cell carcinoma,…
Sample code	State	gender	Measured types of samples (P = plasma, U = urine, T= tissue)	Age	BMI	Type of tumor	Tumor stage	Tumor grade	NM code	StS1	StS2	StS3	StS4	StS6	StS7	StS8	StS10	StS11	StS12	StS13	SHexCer 34:1 ;O2	SHexCer 34:1 ;O3	SHexCer 40:2 ;O2	SHexCer 40:1 ;O2	SHexCer 41:1 ;O2	SHexCer 40:1 ;O3	SHexCer 40:0 ;O3	SHexCer 42:2 ;O2	SHexCer 42:1 ;O2	SHexCer 41:1 ;O3	SHexCer 41:0 ;O3	SHexCer 40:0 ;O4	SHexCer 42:2 ;O3	SHexCer 42:1 ;O3	SHexCer 42:0 ;O3	SHexCer 41:0 ;O4	SHexCer 42:1 ;O4	SHexCer 42:0 ;O4	SHex2Cer 34:1 ;O2	SHex2Cer 40:1 ;O2	SHex2Cer 42:2 ;O2	SHex2Cer 42:1 ;O2
NCS_001	N	M	PU	50.3	UNK	-	-	-	-	8.96934	15.1291	27.0683	20.2766	3.01714	5.16579	3.47097	3.33431	4.66011	1.65265	7.2557	4.02402	2.99903	0.75998	6.55679	3.05853	7.89409	3.99526	2.17453	5.18235	8.38186	2.39052	4.2568	6.58525	14.9721	3.52974	4.48204	4.60337	8.54138	1.06264	1.31723	1.51586	1.71656
NCS_002	N	F	PU	61.3	UNK	-	-	-	-	10.0788	18.7567	15.0541	17.1227	10.2634	3.27125	7.57866	3.62237	6.99271	2.91161	4.34769	3.82259	2.73039	1.32089	6.5658	3.82097	6.79178	4.29335	2.75736	4.86904	7.86329	2.9852	5.20573	5.835	12.6412	3.5475	5.57108	4.72698	10.2826	0.751234	1.11492	1.31125	1.19181
NCS_003	N	F	PU	48.8	UNK	-	-	-	-	4.18118	8.37411	16.661	17.042	4.55139	12.3789	8.62121	5.47677	12.6043	1.8706	8.23856	3.43153	2.21953	1.55617	7.15916	4.27703	7.24303	4.18629	2.64831	5.02835	8.77906	2.76584	4.76122	5.39341	14.3019	3.20143	4.67267	2.93421	8.59387	1.2787	1.58042	1.90017	2.08768
NCS_004	N	F	PU	47.6	UNK	-	-	-	-	3.62305	10.1369	14.5598	11.1368	41.2237	2.314	4.30849	2.98508	4.12346	2.73265	2.85607	1.27654	0.913783	0.612821	5.49864	3.01456	7.47237	4.116	1.27664	4.6225	9.28053	3.03195	5.03281	4.89486	15.4042	3.26405	6.76383	4.11118	13.4147	0.657092	1.74553	1.64972	1.94568
NCS_005	N	F	PU	56.9	UNK	-	-	-	-	2.41835	8.73014	37.1023	29.0577	7.66217	0.755414	4.1023	4.47449	1.48642	3.46123	0.749431	1.46493	0.430625	0.90469	6.057	3.54633	6.79788	3.55843	2.89792	7.1788	8.56154	2.85046	3.28041	5.14644	16.0406	5.3262	4.5001	3.67365	9.65966	0.430625	2.11198	2.60955	2.97215
NCS_006	N	F	PU	59.9	25.39	-	-	-	-	3.17738	8.1327	13.251	23.8019	3.3094	23.9462	7.1946	1.92143	11.9865	0.297823	2.98104	4.09763	2.39178	1.7579	5.16214	1.7579	5.44312	2.58064	1.7579	4.84858	7.98514	1.7579	4.11918	3.61957	15.4919	2.49871	4.54956	2.0909	11.3606	5.83372	1.7579	5.78537	3.35199
NCS_007	N	F	PU	42.5	UNK	-	-	-	-	2.19243	6.78486	16.2602	8.96812	7.87581	2.59666	12.1816	16.1304	5.69548	16.5055	4.80897	3.07121	1.90402	0.97115	7.65868	3.04077	8.58272	4.19985	1.50136	5.28304	9.35865	2.03687	4.60578	5.88616	15.4182	2.98613	5.07694	3.97341	10.5605	0.97115	0.97115	0.97115	0.97115
NCS_008	N	F	PU	53.4	UNK	-	-	-	-	11.0228	25.3998	16.4174	23.8678	4.88219	7.95757	2.73076	1.4613	1.92771	1.99963	2.33297	3.17803	2.31177	1.05328	5.95788	3.29452	5.9953	4.39723	2.35119	4.83028	7.83752	3.18205	3.95143	5.66201	13.9151	4.10527	4.72108	5.03973	9.90263	1.4109	1.79484	2.6274	2.48058
NCS_009	N	F	PU	58	UNK	-	-	-	-	5.34696	12.4741	30.5751	34.5891	2.10986	9.98872	0.222168	0.984385	0.929029	0.276813	2.50377	3.93512	2.25237	1.55267	7.86462	4.41823	6.89979	3.90157	2.79739	6.29058	8.47276	2.62415	3.81812	6.41522	14.2017	3.59595	4.30375	3.71823	8.0925	0.929771	1.27551	1.35087	1.28914
NCS_011	N	M	PU	53.6	27.5	-	-	-	-	7.86746	10.1072	51.8103	12.6847	2.92869	2.77411	4.22844	1.52751	3.32111	0.405598	2.34491	2.54216	2.01572	0.847692	6.03013	3.53582	8.59726	3.5242	2.16668	5.29823	9.63862	2.52229	3.96606	6.24743	16.6247	3.27315	4.42636	3.40295	9.17239	0.809842	2.11329	1.46403	1.78098
NCS_012	N	F	PU	39.4	28	-	-	-	-	14.1733	20.5092	21.4361	14.5037	2.98432	9.87746	1.90626	5.58076	2.04907	2.58337	4.39655	3.30554	1.97163	1.47433	7.01814	4.28563	6.72408	3.50591	3.09194	5.78568	8.59272	2.59311	3.47373	6.53713	15.4765	3.62102	4.107	3.61423	8.36737	1.03743	1.64009	1.84894	1.92783
NCS_013	N	M	PU	33.4	29.63	-	-	-	-	9.97179	14.7083	28.8443	26.843	0.88657	2.57616	4.66863	2.42828	4.10512	2.34969	2.61816	2.51842	1.63926	1.0465	5.82494	3.41961	6.66318	3.62606	2.46606	5.82547	7.96352	2.91833	4.57994	5.4649	15.268	3.67317	5.80817	4.10865	11.4956	0.637749	1.57685	1.45186	2.02379
NCS_014	N	M	PU	54.6	26.79	-	-	-	-	3.26006	14.5113	35.2533	25.5015	0.701344	4.52363	4.10721	2.97658	2.83626	3.78866	2.54017	2.29181	1.56218	0.807099	5.81431	3.13053	6.21768	3.82896	2.52295	6.65076	6.4563	2.33992	4.90661	4.40548	12.8498	3.90458	4.65314	4.155	10.5173	1.60626	3.33822	3.64606	4.39514
NCS_015	N	F	PU	54.8	26.5	-	-	-	-	9.368	16.3463	21.8289	15.6288	6.76746	2.40508	6.58586	5.52923	7.48802	2.10432	5.94802	4.54136	2.70969	1.25155	7.19865	4.0396	7.71282	5.27469	1.98856	4.9101	8.15315	3.35746	4.75402	4.67395	12.6369	3.64732	4.97723	3.16423	8.8368	1.34515	1.63178	1.34599	1.849
NCS_016	N	M	PU	48.9	30.42	-	-	-	-	3.25517	3.02322	2.60126	2.43023	4.09263	3.87404	32.5635	16.6966	10.1964	11.0522	10.2147	1.44316	1.03381	0.588274	5.68919	2.94874	6.65645	3.82774	1.77496	5.10834	8.03764	2.1795	3.97388	4.40465	15.2918	4.06364	4.25311	3.05135	9.93946	1.36652	4.07728	4.80362	5.48691
NCS_017	N	F	PU	47.1	38	-	-	-	-	10.4257	13.348	17.0988	23.7555	9.3132	5.48525	2.60922	5.76251	1.79455	4.24762	6.15967	3.63026	1.82551	1.73342	6.28734	3.39064	6.28677	4.0016	4.22791	7.10493	6.74993	2.55815	3.79545	5.54025	13.3064	3.89313	4.3194	3.76767	9.57931	1.23993	2.24514	2.17494	2.34193
NCS_018	N	M	PU	60.6	29.06	-	-	-	-	9.42077	13.6744	24.2449	21.5362	4.49806	6.84158	7.49695	2.75327	4.90675	1.74433	2.88274	3.88422	1.73113	0.737117	6.87742	4.26311	5.89773	3.76866	2.70071	7.28157	7.80724	2.85108	3.34427	4.37299	14.755	3.95671	4.10495	2.72143	8.52634	1.34214	2.99221	2.65217	3.43179
NCS_019	N	F	PU	52.7	28	-	-	-	-	3.79535	8.21926	38.1839	10.1393	1.26422	8.04088	9.12972	5.5475	5.75545	6.65642	3.26806	2.37122	1.51523	1.4103	7.77535	4.59588	8.49659	3.20425	2.82688	7.59241	9.71374	2.43018	3.37041	6.30416	18.0443	3.71283	3.98133	2.24894	7.98602	0.174771	0.769481	0.552774	0.922936
NCS_020	N	F	PU	57.3	22.1	-	-	-	-	1.81541	10.2085	22.3569	6.26775	5.66892	8.11707	7.21979	12.9023	10.6211	5.46339	9.35885	4.0164	2.04804	0.895979	8.16177	4.39218	7.69001	3.75548	2.70786	7.44902	8.64721	1.96865	3.84151	6.16672	16.3676	2.9465	4.29309	3.106	7.99857	0.533896	0.945168	1.0073	1.06103
NCS_021	N	F	PU	55.3	27.4	-	-	-	-	2.8566	9.454	18.7186	8.86398	12.1872	2.5663	26.2859	7.82173	5.19016	3.4419	2.61366	1.7241	1.28655	0.588234	6.25326	3.30471	5.78655	4.85326	1.92114	5.1077	6.83131	3.18731	5.78939	4.62528	12.2108	4.30162	7.28535	4.78505	14.9881	0.525243	1.43533	1.81012	1.39953
NCS_022	N	M	PU	38.6	28.98	-	-	-	-	5.69996	13.8988	32.9399	23.4874	5.78591	2.13932	1.12828	2.60257	2.35857	2.4548	7.50447	4.87801	2.85614	1.82943	7.73849	3.71824	8.39621	4.53648	3.78818	6.45005	7.77748	2.06963	3.16443	7.15889	13.3035	2.98395	2.96049	3.86867	4.69604	1.78998	2.14739	2.22648	1.66183
NCS_023	N	M	PU	58.5	35.19	-	-	-	-	0.782851	1.23401	2.32388	0.782851	4.64582	27.3577	18.6624	6.93274	22.9648	5.99522	8.3177	1.65816	1.19668	0.814727	4.82764	2.16924	6.28167	5.3438	1.21801	4.35311	6.3626	2.87853	7.10963	4.58835	13.3053	5.1484	7.29049	6.42382	15.6056	0.814727	0.814727	0.980074	0.814727
NCS_024	N	F	PU	34.2	24	-	-	-	-	3.2924	9.04819	18.3431	8.85615	0.857117	9.34826	8.14214	11.2727	9.56642	6.16412	15.1094	4.18951	3.13795	0.916146	6.71034	3.70243	8.21963	4.72896	2.04952	5.31633	9.02305	2.86838	5.56608	4.53222	13.5918	3.76873	5.35005	3.46259	10.0302	0.611578	0.939994	0.515435	0.769099
NCS_025	N	F	PU	53.7	31.64	-	-	-	-	2.51365	5.82348	40.8558	14.5381	10.8436	11.9989	1.11663	2.4678	2.71689	0.472638	6.65246	1.34428	1.05639	0.756337	7.90423	3.33663	8.37137	5.82515	2.65793	3.88115	9.78831	3.39109	3.87888	9.14557	13.331	3.24512	4.93802	5.90301	8.46384	0.695421	0.695421	0.695421	0.695421
NCS_026	N	F	PU	54.5	38.2	-	-	-	-	6.69458	23.003	21.8235	14.328	14.8173	1.20114	1.20114	2.12066	1.20114	12.4084	1.20114	2.84678	1.83826	1.83826	8.4151	4.16355	6.4692	2.34079	1.83826	7.69945	8.95726	1.83826	4.43442	4.47458	16.1485	2.94633	3.85159	2.0497	10.361	1.83826	1.97358	1.83826	1.83859
NCS_027	N	F	PU	37.3	26.23	-	-	-	-	6.51974	13.3255	9.09943	12.6338	34.8337	7.4257	3.31276	2.47175	3.9058	2.57937	3.8924	4.41484	3.5724	0.809482	5.56627	3.02527	6.79899	3.87282	1.74076	4.13538	7.66668	2.53818	5.42551	4.51714	12.3427	2.90326	6.05235	3.12918	10.5751	2.80671	2.6145	2.9629	2.52955
NCS_028	N	M	PU	52	UNK	-	-	-	-	7.31933	17.4593	17.2714	17.9735	0.733035	1.93941	9.48769	10.8481	4.10482	9.28937	3.57407	3.13505	1.82151	0.523753	6.34303	3.38482	7.27388	4.84548	1.76106	6.61698	8.20825	2.92788	4.7742	4.16607	13.2513	4.28958	5.1652	2.93575	9.1835	1.29016	3.02536	2.33382	2.74341
NCS_029	N	F	PU	59.1	UNK	-	-	-	-	4.20418	8.81175	24.042	14.0616	5.55626	10.2501	10.9381	6.3169	7.34857	2.41847	6.05207	3.86096	2.275	0.609522	8.57449	3.85559	7.14212	5.30896	1.98011	6.44372	7.63924	3.13981	5.32259	4.27342	12.5177	4.12296	5.32261	3.41594	10.2263	0.580317	1.01961	1.08905	1.27994
NCS_030	N	F	PU	56.2	29.41	-	-	-	-	4.27646	11.3664	34.6357	29.8141	4.49579	10.0529	0.454123	0.454123	0.454123	0.454123	3.54223	7.06224	2.31533	1.75703	8.10885	3.53084	6.40314	2.59418	4.75259	6.13104	8.00504	1.75703	2.12131	5.19619	14.0503	1.77225	2.47211	2.66778	5.73004	2.99626	3.25835	4.12826	3.18985
NCS_031	N	M	PU	58.7	25.9	-	-	-	-	1.72175	15.6335	33.2934	22.9239	0.225245	4.92487	6.69505	2.8818	6.07588	2.31769	3.30688	1.35388	0.885464	0.291946	5.17206	3.71041	7.19895	3.90365	1.1686	6.08179	9.62245	3.24744	4.38439	3.48523	19.1406	4.60964	6.0022	2.0141	12.9177	0.342574	1.18764	0.84631	2.43299
NCS_032	N	M	PU	46.6	32.6	-	-	-	-	12.571	18.7311	27.7812	18.9156	0.728296	1.95233	5.82681	4.58298	1.89637	5.38878	1.62546	3.55316	3.00514	0.890944	7.95516	4.03576	8.75336	3.99589	1.93462	6.35671	8.50929	2.49051	4.42203	4.78365	15.4123	3.39714	4.69478	2.59398	8.67822	0.617192	1.4165	1.06804	1.43562
NCS_033	N	M	PU	43.5	23	-	-	-	-	4.91203	17.5394	38.4529	23.1518	3.20664	2.21172	1.99507	2.46369	2.45106	1.26234	2.35337	2.92515	1.87833	1.11707	7.04809	4.01478	8.08772	3.93358	2.27105	5.7131	9.61534	2.74647	3.70755	4.43941	15.4419	3.80994	4.87883	2.69625	9.60705	1.01235	1.85679	1.36222	1.83703
NCS_034	N	F	PU	45.5	23.3	-	-	-	-	4.78946	14.9453	32.379	7.71091	5.90973	2.93324	5.10977	11.9291	3.03056	6.23541	5.02754	3.35441	2.9159	0.960811	6.58722	3.3402	6.85348	4.99709	2.29422	4.50932	7.64472	3.10121	6.39116	4.72738	12.3258	4.09685	6.41478	3.75393	12.4079	0.549143	0.841448	0.817101	1.11594
NCS_035	N	F	PU	38.4	29	-	-	-	-	2.21266	8.9018	12.9538	5.52128	0.947619	0.507037	24.5509	19.2132	4.36489	16.8709	3.95593	4.18504	2.91301	1.21813	6.84914	3.26202	8.49033	4.0128	1.21813	4.49389	10.3466	2.22931	3.6397	6.62893	15.08	2.45028	4.9192	3.97115	9.21987	1.21813	1.21813	1.21813	1.21813
NCS_036	N	F	PU	29.5	22	-	-	-	-	2.06678	7.58614	12.1076	5.16503	0.882719	0.509988	27.1666	20.0478	4.5034	15.9483	4.01561	3.76351	3.2425	0.899769	7.2	3.51425	8.23411	3.91618	0.915733	4.61049	10.3285	2.98279	3.71611	5.94736	15.5388	2.97595	5.16434	3.48696	9.96352	0.899769	0.899769	0.899769	0.899769
NCS_037	N	M	PU	43.6	29.8	-	-	-	-	4.53621	8.04878	25.6537	16.9256	0.619782	22.2922	1.46989	2.32732	5.37628	1.24821	11.5021	3.90642	2.68337	1.36389	7.53011	4.06278	7.85411	4.21119	2.781	5.60818	8.47306	2.80207	4.57212	5.63678	13.3309	3.19906	5.03144	3.41085	8.86821	0.935065	1.54501	1.19249	1.00188
NCS_038	N	M	PU	54.9	24.49	-	-	-	-	1.34968	6.14507	24.2641	12.6061	0.705614	2.21779	15.1527	14.1593	7.50768	6.39355	9.4984	4.33718	2.22487	1.10421	6.70885	3.37203	5.99628	4.08798	3.05062	6.82903	7.00563	2.41389	4.05985	4.23733	12.5073	3.38241	4.5685	3.43882	9.77754	2.41691	2.47146	2.88494	3.12441
NCS_039	N	M	PU	55.6	27.43	-	-	-	-	14.0582	8.62946	35.1298	17.1386	1.73469	6.87368	2.60048	3.3809	4.2485	1.3418	4.8639	3.99089	2.95386	0.530735	6.70257	3.48024	7.27592	4.07124	1.94719	4.35381	8.10097	2.69875	5.49566	5.42626	13.2571	2.55832	5.85323	4.20159	10.4769	1.50116	1.57521	1.91854	1.62978
NCS_040	N	F	PU	46	24.45	-	-	-	-	1.63956	7.19167	30.2129	3.83609	10.7181	4.50449	7.50439	10.6664	5.69042	12.3562	5.67984	5.3822	4.11665	0.805349	6.1583	2.91404	7.93701	4.26348	1.42425	4.01577	7.96827	2.1134	5.0671	4.87551	13.0039	3.33719	5.5809	5.32806	12.2189	1.07367	0.805349	0.805349	0.805349
NCS_041	N	F	PU	45.1	24.5	-	-	-	-	4.90717	8.53155	9.72533	10.3268	44.5381	3.44193	4.09564	4.22184	3.70188	3.16654	3.34314	3.39002	2.97312	0.726029	5.12339	2.42774	7.23113	3.28156	1.68651	5.28004	8.04295	1.50874	7.18238	3.99863	14.5549	2.87809	7.28443	4.01468	15.5116	0.726029	0.726029	0.726029	0.726029
NCS_042	N	M	PU	43.9	25.66	-	-	-	-	16.9375	13.8386	35.4512	26.2942	0.201714	1.1493	1.11505	1.63694	0.996801	1.37972	0.999115	2.82112	1.75842	0.944413	7.15446	3.77202	6.78604	4.24397	2.0901	5.41633	7.72923	3.06028	4.91787	5.73166	12.696	3.81378	5.46116	3.25483	10.1927	1.0519	2.25439	2.73565	2.11365
NCS_043	N	M	PU	59.1	21.7	-	-	-	-	4.53498	9.64592	18.3964	12.6199	2.61752	2.62678	19.8093	4.15823	18.2298	2.35559	5.00564	3.70458	2.22496	1.04632	6.82841	3.44514	6.33675	5.61659	2.27342	5.43919	6.49207	3.61383	5.09708	4.15529	11.8217	4.67425	5.58423	3.96652	10.6344	1.26415	1.84766	2.06752	1.86592
NCS_044	N	M	PU	43.6	27.2	-	-	-	-	7.93647	12.6691	28.2861	29.2129	3.45832	6.75558	1.74871	1.75107	4.19109	1.10463	2.88596	4.43213	2.71292	1.53187	7.90549	3.62496	7.47089	4.65793	2.79821	5.27025	7.86782	2.81919	4.61208	7.17577	13.9156	3.09021	4.10035	4.30598	6.6414	1.28896	1.27911	1.37852	1.12035
NCS_045	N	F	PU	54.2	33.1	-	-	-	-	2.10062	7.39606	32.6111	16.1259	10.8169	6.14479	4.69538	5.7711	4.48118	5.19236	4.66464	2.88107	2.01486	1.10285	6.04277	3.51874	7.22675	3.82562	3.51325	6.0155	8.25892	2.68107	3.35812	6.41646	14.5354	3.25098	4.45525	3.71938	8.22393	1.58444	2.34645	2.49486	2.53337
NCS_047	N	M	PU	45	23.55	-	-	-	-	15.2325	16.5604	41.6327	20.8756	1.67602	0.886787	0.462719	0.782156	0.671355	0.21025	1.00949	2.41083	1.76155	0.932708	5.93003	3.22231	7.47928	3.96923	2.55506	5.94981	8.42237	2.66713	4.60343	5.52659	15.6505	3.65629	5.36858	3.89116	11.0463	0.610797	1.49415	1.17901	1.67293
NCS_048	N	M	PU	53.2	24.11	-	-	-	-	5.01409	9.52786	30.6404	9.5363	0.588638	6.31413	4.44516	11.5763	4.03378	6.53854	11.7848	2.50047	1.79606	1.03211	7.41131	3.97859	8.08639	4.18233	2.03655	6.12896	8.1921	2.98543	3.70474	4.82907	14.4947	3.75742	4.32792	2.55762	8.91145	1.0505	2.30351	2.35554	3.37718
NCS_049	N	M	PU	39.7	UNK	-	-	-	-	7.76288	9.25234	45.9253	17.8104	0.88826	2.08465	0.356128	5.95514	1.42127	1.94015	6.60349	4.77735	2.21793	1.30832	7.33119	2.2646	8.69057	4.79321	1.30832	4.14554	9.2858	2.09412	3.95204	7.21482	14.5597	2.81164	4.10575	3.46474	10.4411	1.30832	1.30832	1.30832	1.30832
NCS_050	N	M	PU	52.4	UNK	-	-	-	-	13.417	13.2687	24.8817	21.6033	2.09077	10.1632	1.84794	2.53454	3.72629	1.04278	5.42371	4.7853	3.23645	1.38036	6.59951	3.49295	6.3985	3.59962	2.68884	5.07705	7.89018	2.52993	3.66456	6.90672	15.3332	3.99386	4.23669	3.82664	9.80219	0.932568	0.980031	1.55141	1.09345
NCS_051	N	M	PU	40.2	28.4	-	-	-	-	17.5024	12.9364	19.8262	25.9753	1.70364	5.64241	3.70423	5.83418	1.8171	1.88838	3.16978	3.58945	2.07331	0.991611	7.31689	3.75612	6.80268	3.64664	2.38826	5.07802	7.06518	2.37131	3.95424	6.10388	12.9226	3.06501	3.82957	3.87964	7.27158	2.60529	3.34468	4.67545	3.2686
NCS_052	N	M	PU	64.4	34.29	-	-	-	-	8.84673	14.6781	20.6451	34.7494	2.43319	4.56297	1.45881	3.24457	2.06156	1.1319	6.18773	5.64837	3.94092	0.599795	6.856	3.24072	8.00334	4.02619	1.31621	4.78404	7.73386	2.11907	5.55565	5.29272	14.4209	2.51785	5.67789	3.12273	9.86616	1.63286	1.5655	0.931376	1.14786
NCS_053	N	F	PU	46.2	20	-	-	-	-	4.65067	17.319	34.2581	6.56037	8.89362	1.68002	10.9613	5.91345	4.76308	2.60465	2.39576	2.56142	1.08059	0.64907	7.25559	4.09811	6.15209	4.4258	2.81793	9.56507	7.12204	2.73583	3.65913	4.33387	15.0869	7.9169	4.42165	2.26563	10.9522	0.64907	0.64907	0.64907	0.952941
NCS_054	N	M	PU	54.2	26.3	-	-	-	-	4.59608	11.8666	32.6534	27.1435	4.96594	1.32116	6.4099	1.67522	5.22027	0.831732	3.31626	3.24054	2.42129	1.46287	6.67062	1.85509	10.9563	4.28529	1.46287	1.77689	8.7637	1.73981	5.94204	7.26816	13.6026	1.46287	5.6092	4.79616	10.8323	1.46287	1.46287	1.46287	1.46287
NCS_055	N	F	PU	51.2	23.71	-	-	-	-	2.72275	4.32132	18.4902	8.01911	12.7382	7.33155	11.6316	7.22324	10.0424	7.48876	9.9909	3.82364	1.84314	1.19088	7.69081	3.11825	5.7471	3.23591	4.26979	6.15077	7.5291	1.86467	3.8169	6.76814	13.4264	2.9154	4.3246	4.60559	9.85722	1.35548	1.6514	2.51816	2.29671
NCS_056	N	M	PU	29.8	25.45	-	-	-	-	5.95621	18.3086	21.3543	33.6245	2.20829	8.66609	0.373273	2.45899	0.624642	1.23619	5.18886	3.55479	2.10378	1.0958	7.91192	4.14641	7.92004	4.29612	2.9797	6.03831	8.11342	3.19699	3.86011	5.50795	14.0932	3.70514	4.60126	3.17176	8.21828	1.04227	1.77217	1.35537	1.31527
NCS_057	N	F	PU	53.5	30.12	-	-	-	-	4.31012	11.2668	9.16601	17.9637	33.0672	5.10663	4.88373	4.44492	4.25033	0.778451	4.76214	2.04929	1.14821	1.14821	6.86691	2.74966	7.93683	4.27633	1.14821	5.34462	8.38312	2.15065	5.79401	2.32236	13.8802	4.00735	6.9154	2.48059	16.8052	1.14821	1.14821	1.14821	1.14821
NCS_058	N	F	PU	40.9	23.4	-	-	-	-	6.58105	10.1312	28.7742	20.0013	17.4444	2.936	3.56737	1.8921	3.75327	1.33869	3.58037	3.80795	2.69689	0.958876	6.21686	3.21769	6.63214	3.5163	2.73062	5.57339	7.87508	2.32171	4.94431	6.66218	14.6962	3.03077	5.33222	4.64313	11.3733	0.702403	0.872592	1.09358	1.10184
NCS_059	N	M	PU	44.5	25.38	-	-	-	-	11.6409	10.0777	40.2682	20.9736	1.54698	5.23065	0.288452	1.58809	1.95862	0.288452	6.13838	2.43553	1.96584	0.686068	7.31643	3.38237	8.22947	4.44065	1.87523	4.68466	7.84398	2.61975	5.67361	6.62733	14.5465	3.13924	5.66659	4.34183	10.7515	0.42003	1.39812	1.06176	0.893564
NCS_060	N	M	PU	36.3	24.82	-	-	-	-	7.18461	9.67034	22.3888	6.84604	6.16781	24.386	3.37314	5.09114	4.29004	4.81871	5.78334	3.13553	2.60277	0.990434	6.19361	3.45946	7.77591	3.51095	2.02109	4.45848	9.8556	2.60486	3.94165	7.42164	15.8784	3.12298	5.06849	4.62644	9.07364	0.731172	0.977898	1.40037	1.14864
NCS_061	N	M	PU	63.5	15.96	-	-	-	-	6.90758	10.7895	21.123	33.3571	1.76924	10.2995	5.37656	2.00119	4.0969	1.32016	2.95928	4.52471	3.04772	1.58202	6.20334	3.37634	6.7363	4.24136	2.57204	4.64566	6.97886	2.76568	5.64508	5.61336	11.959	3.47849	5.53403	4.46903	9.55658	1.60738	1.51013	2.003	1.94989
NCS_209	N	F	U	42.2	17.3	-	-	-	-	4.16932	13.1037	21.4723	7.89261	3.66836	3.38897	5.25408	11.8379	4.60989	12.5782	12.0246	7.38883	2.70832	0.911893	9.85218	4.70333	7.51417	6.70939	2.37718	4.88449	6.66471	3.33711	5.00965	5.18651	10.6262	4.05941	4.36414	2.81684	7.353	1.48803	0.681549	0.681549	0.681549
NCS_210	N	M	U	36.6	22.4	-	-	-	-	8.38086	13.3284	23.8999	11.2053	3.98772	4.75638	7.8934	7.17666	4.87033	5.06877	9.4323	5.84554	4.41523	1.32984	7.809	4.35517	8.66647	3.15725	2.23092	5.29665	9.87579	2.07065	2.8267	6.24132	15.2605	2.52461	3.12699	2.33396	6.03234	1.93351	1.4638	1.61514	1.58863
NCS_211	N	F	U	35.7	19.03	-	-	-	-	10.4287	17.7206	19.6059	9.39599	1.55368	2.32119	11.9359	11.2129	3.12343	9.3521	3.34957	3.3025	2.61811	0.722221	7.04522	3.68159	7.06953	4.37073	2.08084	5.32152	8.37933	2.65221	5.62055	4.64087	14.2637	4.00393	5.35429	3.70993	12.5662	0.319402	0.735589	0.667337	0.874452
NCS_212	N	M	U	36.3	29.57	-	-	-	-	6.45348	8.66642	18.8865	6.65469	3.51546	14.5057	12.7408	7.69784	10.1968	2.64562	8.0367	4.70923	2.99339	0.422707	7.01848	3.85433	8.33593	3.88775	1.04719	4.92466	9.58505	2.18714	3.74097	4.17879	14.4264	2.84387	4.43707	2.15229	7.28542	2.99289	3.47948	2.50848	2.98853
NCS_213	N	F	U	37.4	24.21	-	-	-	-	2.48888	9.4845	22.6694	5.91607	18.0312	7.97809	6.42945	4.13934	11.325	4.06936	7.4687	4.4677	3.12383	0.781446	6.5554	3.59847	7.33929	4.63052	2.12801	4.96409	8.48288	3.28029	4.50518	5.85684	14.411	3.92985	5.26181	4.43706	9.63347	0.56648	0.613318	0.743007	0.690053
NCS_098	N	M	PU	47	27.7	-	-	-	-	2.86272	5.4675	26.4593	9.09159	7.34493	12.1435	6.20521	8.97051	6.4404	2.55468	12.4596	4.68508	2.89674	0.769496	8.15971	4.24517	8.53076	4.54771	0.939468	5.88132	9.49879	2.7797	3.55012	3.78443	15.528	3.87795	4.41914	1.616	8.66674	1.51061	1.76871	0.873465	1.47093
NCS_094	N	F	PU	43	23.5	-	-	-	-	0.57191	10.8184	40.5069	13.819	5.49237	4.98381	4.50189	5.01161	4.11149	4.23039	5.95225	11.1231	8.23402	0.871023	5.37313	0.908938	6.12315	6.09716	1.17215	1.4318	4.90758	2.48718	8.3799	4.92769	7.3288	2.37169	6.84717	6.40925	11.2952	1.21347	0.832519	0.832519	0.832519
NCS_214	N	M	U	36.9	23.36	-	-	-	-	13.3289	14.985	45.2971	10.2604	1.3929	6.42607	2.95643	0.849883	1.85306	0.698358	1.95182	5.30682	4.51153	1.15296	7.24918	3.45476	9.22336	4.74369	1.45297	2.80771	9.33314	2.76193	4.90028	8.78183	12.3687	2.55544	4.55535	4.87909	7.36329	0.848534	0.50826	0.732954	0.50826
QC_01	QC	QC	QC	QC	QC	QC	QC	QC	QC	4.98921	9.48042	36.4211	22.2681	1.7145	5.2716	3.59714	4.55531	3.3182	4.47256	3.9118	2.7387	1.56354	0.958455	6.44883	3.62588	6.45637	3.88346	3.27233	7.23724	7.85174	2.53828	3.82362	4.80719	15.0152	4.12866	4.48573	3.20431	9.32217	0.883707	2.38389	2.51584	2.85485
QC_02	QC	QC	QC	QC	QC	QC	QC	QC	QC	5.06528	9.10026	37.5498	21.9052	1.62189	5.05718	3.68789	4.50464	3.24799	4.38834	3.87146	2.68189	1.48655	1.14292	6.5911	3.90787	6.54552	3.60922	3.36934	7.35431	7.94996	2.62868	3.54612	5.21355	14.9497	4.21403	4.3505	3.24494	8.9968	0.845701	2.28334	2.43978	2.64816
QC_03	QC	QC	QC	QC	QC	QC	QC	QC	QC	4.92155	9.58947	38.0545	22.7911	1.60533	5.11165	3.13773	3.97135	2.98206	4.25116	3.58406	2.76939	1.4987	0.597641	6.59905	3.92624	6.80049	3.71559	2.74647	7.62931	8.33305	2.62943	3.68842	4.32326	15.663	4.47724	4.30282	2.64056	9.7206	0.761493	2.36012	2.03057	2.78659
QC_04	QC	QC	QC	QC	QC	QC	QC	QC	QC	4.7769	9.5662	39.6235	21.9423	1.23029	5.13082	2.93193	3.96976	2.94671	4.22326	3.65834	2.97853	1.46024	0.673693	6.45063	3.74932	6.44716	3.6579	3.23513	7.29058	7.654	2.54917	3.34106	5.20299	15.9757	4.30495	4.42652	3.0188	9.32258	0.812157	2.15827	2.33371	2.95691
QC_05	QC	QC	QC	QC	QC	QC	QC	QC	QC	4.8375	9.50067	39.0386	21.4946	1.64603	5.1378	3.11569	4.21564	2.88684	4.22048	3.90615	3.22483	1.79864	0.868908	6.57312	4.01381	6.56625	3.68728	3.30392	7.26042	7.69653	2.60006	3.48889	4.95252	15.0643	4.17511	4.21144	2.86572	9.31788	1.04931	2.19222	2.3035	2.78532
QC_06	QC	QC	QC	QC	QC	QC	QC	QC	QC	5.34439	9.54428	37.0708	21.3526	2.02265	5.43114	3.53251	4.51695	3.11887	3.7829	4.28282	2.87106	1.6436	0.779867	6.86231	3.82686	7.05163	3.58963	2.87021	7.41736	7.9803	2.8219	3.75368	4.30926	16.0715	4.28132	4.7078	2.50987	9.25972	0.685019	2.10933	1.94156	2.65617
QC_07	QC	QC	QC	QC	QC	QC	QC	QC	QC	5.74491	9.40355	35.7937	20.7528	2.59046	5.50174	4.21727	4.72622	3.38531	3.90562	3.97835	2.55602	1.43863	1.07563	6.70506	3.86154	6.69567	3.86241	3.00968	7.24182	7.99522	2.63095	3.98648	4.66176	14.9678	4.32776	4.60253	2.96922	9.17626	0.845529	2.47691	2.23234	2.68077
QC_08	QC	QC	QC	QC	QC	QC	QC	QC	QC	5.35862	8.2974	38.2265	19.0887	2.18362	4.63418	4.23627	5.57645	3.33964	5.57149	3.48712	3.25033	1.77752	1.08906	6.68345	3.9324	6.60814	3.72009	3.18484	7.20471	7.70862	2.62004	3.92597	4.95112	14.7363	3.88472	4.24834	3.12705	9.01062	1.09878	2.1075	2.26235	2.868
QC_09	QC	QC	QC	QC	QC	QC	QC	QC	QC	4.94	8.98694	37.4588	19.638	2.54831	4.77843	4.59595	5.23285	3.43708	4.46033	3.92339	2.89363	1.61331	1.06383	6.68665	3.88526	6.594	3.64588	3.39205	7.2739	7.99836	2.59959	3.49675	5.21646	14.7437	4.09545	4.33843	3.1993	9.21829	0.837642	2.12182	2.44796	2.63771
QC_10	QC	QC	QC	QC	QC	QC	QC	QC	QC	4.84777	8.99182	37.7438	20.5563	3.36623	4.55296	3.96731	4.49528	3.1623	4.7243	3.59195	3.31153	1.99053	0.995165	6.47354	3.7308	6.57971	3.83743	3.07286	7.10595	7.74053	2.77988	3.85492	5.05866	15.0229	4.0904	4.41536	3.17308	8.64428	1.13158	2.1611	2.24801	2.58182
QC_11	QC	QC	QC	QC	QC	QC	QC	QC	QC	5.18125	9.34924	38.2156	19.5125	2.60292	5.03222	3.82205	4.79019	3.14448	4.62991	3.71961	3.68049	1.93734	1.09923	6.44694	3.90873	6.7697	3.56695	2.94984	6.85184	7.64154	2.60683	3.68975	5.0256	15.0084	4.01804	4.24274	3.06103	8.94871	1.16072	2.22709	2.24248	2.91598
QC_12	QC	QC	QC	QC	QC	QC	QC	QC	QC	4.9948	9.91831	35.8777	21.0809	2.95378	4.91698	4.11888	4.70182	3.34284	4.52853	3.56544	3.01715	1.81662	0.83783	6.31523	3.85281	6.79506	3.83457	3.09346	7.46595	7.77105	2.69076	3.80486	4.72908	15.1606	4.138	4.48707	3.02982	9.24943	0.963985	2.18743	2.09018	2.66906
QC_13	QC	QC	QC	QC	QC	QC	QC	QC	QC	5.68595	9.30516	37.0782	20.2607	3.23175	5.0303	3.94668	4.53472	3.08861	3.89695	3.94097	3.40892	1.97904	1.03987	6.97984	3.83748	6.32821	3.53861	3.39233	7.12654	7.72781	2.52046	3.70851	5.12402	14.6327	4.33249	4.25765	3.12589	8.67365	1.07427	2.06372	2.46781	2.66019
QC_14	QC	QC	QC	QC	QC	QC	QC	QC	QC	5.22175	9.23311	38.1376	19.5983	1.74807	4.79512	4.10086	5.25549	3.13857	5.08399	3.68716	2.71904	1.61288	1.03283	6.5328	4.05836	6.60354	3.82698	3.39066	7.35848	7.59098	2.83247	3.82199	5.07629	14.8784	4.24373	4.278	3.07913	9.16691	0.801973	2.13529	2.22172	2.73758
QC_15	QC	QC	QC	QC	QC	QC	QC	QC	QC	5.19561	8.67907	38.4682	19.4606	2.32895	4.5983	4.37784	5.08135	3.24828	4.76698	3.79484	2.73479	1.39421	1.10993	6.92932	4.03749	6.74436	3.55741	3.5275	7.37872	7.8695	2.49991	3.61991	5.46367	15.0079	4.15942	4.26194	3.11856	8.55279	0.756303	2.28174	2.31144	2.68319
QC_16	QC	QC	QC	QC	QC	QC	QC	QC	QC	5.08018	9.29616	38.2537	20.0445	2.95472	4.86101	3.77766	4.71606	3.05867	4.38177	3.57564	3.14858	1.73943	0.90541	6.59865	4.02402	6.60842	3.60391	3.35938	7.31507	7.83999	2.59591	3.43477	5.3287	15.3193	4.05585	4.29181	3.01466	8.966	0.867919	2.10019	2.11781	2.76419
QC_17	QC	QC	QC	QC	QC	QC	QC	QC	QC	5.04529	9.55728	37.9824	20.6261	2.68504	5.22953	3.4196	4.25341	3.23114	4.15338	3.81677	2.94951	1.3324	1.03004	6.59349	3.90414	6.67092	3.55315	3.4216	7.64455	8.0202	2.43077	3.31024	5.19611	16.0741	4.15891	4.2654	3.06217	8.8415	0.656158	2.09198	2.18292	2.60978
QC_18	QC	QC	QC	QC	QC	QC	QC	QC	QC	5.34511	9.7876	36.7924	19.9994	2.57373	5.49329	3.88835	4.82133	3.34602	3.83927	4.11346	2.26999	1.28512	0.959188	6.61253	3.97221	6.89114	3.46025	3.21742	7.45254	7.86448	2.64121	3.35468	5.23385	16.2123	4.28372	4.6673	2.92923	9.11396	0.664586	2.06266	2.11786	2.73375
KCS_021	T	M	PUT	51.2	UNK	ccRCC	pT1a	G2	N0M0	1.60059	6.43044	36.0882	17.6396	1.93099	7.13281	8.38794	9.7078	3.73418	4.20215	3.14539	1.73981	1.07304	0.49731	4.909	3.0174	5.92175	3.8773	2.17046	6.72335	7.50713	2.7678	4.61012	3.25971	15.4778	4.61864	5.95397	1.96649	13.8862	0.843958	2.76746	2.6095	3.80181
KCS_022	T	M	PUT	81.2	23.88	ccRCC	pT1a	G1	N0M0	3.59134	12.1353	46.5556	11.1085	4.27494	4.08832	3.36905	2.96237	3.81448	0.349148	7.75094	3.17353	1.13819	0.767233	7.02641	4.42181	6.43707	3.28212	3.19807	8.3259	7.83259	2.53975	2.77385	5.27076	16.1278	4.81108	3.69555	2.04834	8.58483	0.961784	2.25203	2.47423	2.85709
KCS_023	T	F	PUT	81	28.04	ccRCC	pT2b	G2-3	N0M1	2.07226	7.57051	25.3866	16.169	3.44589	5.39784	14.7572	6.71622	10.5951	3.25393	4.63543	2.77473	1.42371	0.685804	6.68472	3.6732	6.45784	3.03241	2.93528	7.35384	8.18396	1.74801	3.70206	4.35556	16.3366	3.2702	4.69064	2.25488	11.4114	1.64688	1.95699	2.89483	2.52649
KCS_024	T	M	PUT	54.9	27.08	ccRCC	pT2a	G2	N0M0	7.88824	21.885	18.408	29.6214	0.849711	1.81045	5.26125	2.60516	6.23963	1.61491	3.81622	2.85959	1.92368	1.07064	7.17497	3.83301	7.10153	4.52038	2.24102	6.51387	8.26712	3.0705	3.10134	4.96465	15.8162	5.00327	3.77741	3.17709	9.46594	0.765877	1.67511	1.6374	2.03945
KCS_026	T	M	PUT	64.7	21.33	ccRCC	pT1a	G2	N0M0	7.81499	13.8568	28.0876	32.1218	4.93212	6.17254	0.392361	0.891207	0.768251	1.97798	2.98437	3.35302	2.85972	0.693211	3.50585	1.49563	5.15537	2.37067	1.20367	3.95048	6.13626	1.13006	2.26358	2.45386	10.7301	3.38347	3.57788	2.00787	7.57409	17.9291	3.34222	10.7614	4.12241
KCS_027	T	F	PU	62.9	26.67	ccRCC	pT1b	G2	N0M0	0.678518	2.79639	13.9078	7.92833	20.8596	13.0652	6.92863	8.64077	8.35926	9.43228	7.40318	1.97865	1.52992	0.725731	7.4464	4.24877	8.19402	3.4087	2.45619	6.97157	9.91055	2.50558	2.8691	6.38367	19.3452	4.3522	3.56421	2.70691	7.69406	0.439612	0.877049	0.710941	1.68091
KCS_028	T	M	PUT	54.9	22.64	ccRCC	pT1b	G2	N0M0	2.77362	9.68379	20.6859	20.6592	28.5802	1.51611	0.532775	0.532775	5.10177	3.31833	6.61548	21.4992	6.40165	1.57389	6.4703	1.57389	5.00861	2.34648	9.64795	2.29143	3.58882	1.57389	3.7504	4.376	7.95327	1.57389	3.68546	4.1853	6.20404	1.57389	1.57389	1.57389	1.57389
KCS_029	T	F	PU	72.8	20.7	ccRCC	pT2a	G3	N0M0	1.47478	6.39715	25.3432	22.8002	14.3875	6.58788	2.52249	3.60853	4.01498	6.30571	6.55756	3.57395	1.7461	0.849797	7.46168	3.8548	7.05024	3.93327	4.04294	7.02239	7.6626	2.26258	4.24464	4.99438	13.477	3.38827	4.93904	3.61217	9.35151	0.638821	2.09212	1.57737	2.22432
KCS_031	T	M	PUT	32.8	24.8	ccRCC	pT3a	G3	N0M0	11.8798	13.7555	25.3105	29.1174	0.448394	3.84532	3.37672	5.52528	2.18139	1.63952	2.92013	3.2635	1.67147	1.16834	8.12292	4.78969	7.23028	4.45864	3.36894	7.06594	7.68636	2.96984	3.89038	5.10948	13.6409	3.61789	4.08748	2.62771	8.22029	0.514983	1.79977	2.25542	2.43978
KCS_032	T	F	PUT	68.2	19.2	ccRCC	pT1b	G1-2	N0M0	2.18128	14.9188	42.6761	26.4816	3.5612	1.4804	2.77914	1.4804	1.4804	1.4804	1.4804	3.00775	1.64833	1.01464	6.30741	3.36777	7.66516	3.51951	1.21973	5.1917	9.70028	2.60754	4.01342	5.63603	16.2964	3.44569	5.10809	4.74684	11.3879	1.01464	1.04593	1.01464	1.04059
KCS_033	T	M	PUT	71.1	24.84	ccRCC	pT1b	G4 (sarcomatoid)	N0M0	1.55898	5.1156	36.488	30.4272	0.108657	10.1316	3.69063	2.66275	5.42405	1.17473	3.21772	3.05582	1.63107	1.2165	6.05557	3.11406	5.77452	2.97903	4.36397	6.99421	6.97644	1.94425	3.69912	3.54392	12.8976	2.85127	4.49588	2.74703	8.36284	2.28916	4.4903	4.45568	6.06174
KCS_034	T	M	PUT	48.1	27.77	ccRCC	pT3a	G2	N0M0	15.4131	24.2459	22.4239	18.6168	3.68915	1.70268	1.89219	3.09841	2.01701	2.44664	4.45426	4.62171	1.37701	0.892717	9.41554	3.8983	5.95707	4.20221	4.03033	8.51728	5.82929	2.57328	3.08017	5.48205	12.4884	4.25615	3.27343	3.25567	7.63597	1.83366	2.01366	2.79061	2.57552
KCS_035	T	M	PU	51.8	37.01	ccRCC	pT3a	G4 (sarcomatoid)	N1M1	4.44896	7.41309	38.0187	21.1212	5.36143	0.486247	3.82148	7.26876	2.88147	1.63191	7.54672	4.05808	1.34127	2.67879	5.87955	2.76112	3.84346	1.39423	6.30504	6.44325	4.90131	1.05594	1.13948	4.63843	8.86521	1.45466	1.81909	2.09387	3.28981	4.87657	9.56421	10.9686	10.6281
KCS_036	T	M	PUT	75.1	24.91	papRCC	pT3a	G3	N0M0	1.85206	5.3788	47.3461	22.0511	0.482768	7.39258	0.441791	3.72485	2.67666	1.07373	7.57956	2.63706	1.20474	1.20474	6.45209	2.92912	6.13891	4.17817	2.9441	7.91357	7.68449	2.30537	2.7033	4.13929	15.6955	4.86883	4.30376	2.3232	9.98364	1.20474	2.37139	2.8934	3.92061
KCS_037	T	F	PUT	59.7	31.64	ccRCC	pT3b	G3	N0M0	3.08852	10.2514	51.1258	18.7376	1.6767	2.62614	1.02475	2.00799	3.47471	3.94046	2.04588	6.69682	5.39823	2.35421	5.12182	1.6005	4.3194	1.46744	9.14706	3.49358	6.23116	1.3905	1.3905	4.85051	9.15151	1.3905	1.3905	1.90649	4.19218	7.06845	7.08996	10.7981	3.55062
KCS_038	T	M	PU	66.3	32.51	ccRCC	pT1b	G2	N0M0	1.54494	6.13334	26.2686	29.8021	1.24475	26.5737	0.743399	1.15434	2.46987	0.656738	3.40829	3.00032	1.38721	0.616536	6.25864	3.64861	5.91248	3.86505	1.62817	6.54934	7.34873	2.55554	3.33081	4.72291	16.7974	4.36034	3.82634	2.50081	8.7084	2.19438	3.10511	3.28841	4.39445
KCS_039	T	F	PU	73	28.01	ccRCC	pT1a	G2	N0M0	2.63859	7.74701	39.6138	34.2284	0.597026	4.16048	2.3438	2.99787	2.17565	0.904574	2.59283	4.38888	3.37549	1.26284	6.36772	4.59953	6.71359	2.4723	2.58814	7.50062	9.11325	1.68697	2.49985	7.69409	18.8862	3.4967	3.32417	2.49667	6.97266	0.48361	1.22643	1.23407	1.61618
KCS_040	T	M	PUT	50.4	27.47	ccRCC	pT3a	G2-3	N0M0	3.24435	5.47296	23.7648	16.5425	0.280769	13.3027	4.46107	12.6423	3.45859	0.671423	16.1584	1.85638	1.34213	0.661019	5.90888	3.42816	6.03458	4.34192	2.53936	6.28997	7.05739	2.99452	4.21532	3.84638	13.114	5.83645	5.14525	3.14182	9.5094	1.08066	3.50677	3.32582	4.82378
KCS_041	T	F	PUT	72.6	31.25	ccRCC	pT1a	G2	N0M0	4.32408	7.90094	16.0392	15.0805	7.73973	12.0262	3.94143	8.12139	6.30364	3.89142	14.6315	2.9993	0.969437	0.969437	7.18993	3.9743	5.65225	3.51297	2.58536	6.5498	8.33807	2.68239	4.30625	5.13013	14.7131	3.42289	6.06759	3.71791	11.5933	0.969437	1.08737	1.7565	1.81226
KCS_043	T	M	PUT	50.2	33.21	ccRCC	pT3a	G2	N1M1	1.87016	10.0727	31.7756	35.8407	1.81821	3.26506	1.75276	2.80063	3.60831	2.62556	4.57026	3.44577	1.81635	1.40895	5.62241	2.22248	6.29403	1.40895	5.58488	9.20116	6.8309	1.40895	1.79753	5.47058	17.5281	1.54534	2.31324	1.51595	7.34987	1.69919	4.08609	5.25289	6.1964
KCS_045	T	M	PUT	80.9	23.66	ccRCC	pT3a	G3	N0M0	13.3618	15.8349	43.303	8.18028	0.937796	2.17825	5.56973	2.28608	4.79482	1.40683	2.14652	4.44619	1.68893	0.467799	5.67945	3.44203	4.78758	3.20511	2.52281	6.96698	6.07907	2.02656	4.04818	4.0797	13.4396	3.2825	4.60389	2.83232	9.46907	2.7828	4.02396	5.06114	5.06432
KCS_047	T	M	PUT	44.7	35.65	ccRCC	pT1b	G1	N0M0	10.3439	19.5389	9.81859	23.0573	9.90704	4.56757	2.83577	6.63417	2.83577	2.83577	7.62526	1.62549	1.62549	1.62549	4.16019	1.84729	7.54603	3.1506	1.62549	4.55403	7.79483	2.65844	2.39021	5.4716	18.696	8.11658	4.43134	3.29234	12.8866	1.62549	1.62549	1.62549	1.62549
KCS_048	T	F	PUT	64	29.74	ccRCC	pT3a	G3	N0M0	3.65529	10.4677	32.9073	23.4273	17.7023	4.14847	1.47714	2.04353	1.93757	1.36596	0.867415	1.94936	1.19327	0.833293	5.58306	3.02757	6.75827	3.55358	2.6926	5.77116	8.5798	2.40812	3.76269	6.6685	15.793	4.33562	5.01579	5.07663	11.0574	0.833293	1.18967	1.81904	2.0983
KCS_049	T	M	PUT	70.7	31.02	ccRCC	pT3a	G3	N0M0	3.07971	8.28159	17.8209	22.4354	5.60698	5.19811	14.6073	7.56556	7.79506	2.97481	4.63457	4.97419	2.58232	0.822766	6.53512	3.06619	6.3483	4.13508	2.01437	3.86707	6.89239	2.31899	5.50394	4.03701	11.6252	3.40349	6.35258	3.82127	11.4158	2.79873	2.25173	3.41144	1.82201
KCS_051	T	M	PUT	59.2	24.78	ccRCC	pT3a	G4 (sarcomatoid)	NxM0	2.09663	5.19852	59.0389	14.3111	0.223674	0.959938	3.02102	10.7839	1.46429	1.12456	1.77756	3.56638	1.37332	2.57333	7.06149	3.58522	4.08603	3.2858	7.62101	7.69068	4.03024	2.26131	1.86171	4.18796	8.45892	3.86395	2.21457	2.36917	4.23555	2.21153	6.47632	10.2314	6.75415
KCS_052	T	M	PUT	77	24.76	ccRCC	pT3a	G3	N0M0	0.10512	3.16403	14.2844	20.5887	0.710438	6.94537	2.43734	10.9746	9.26731	9.46144	22.0613	4.30313	2.82796	0.900024	6.9718	3.31063	6.59225	2.74883	4.4421	5.74246	6.8769	1.37772	3.29963	5.19029	11.7111	2.28964	3.4758	2.82381	6.7765	2.39441	5.03552	6.63894	4.27054
KCS_053	T	M	PUT	58.3	23.67	ccRCC	pT1a	G3	N0M0	10.3077	12.0852	41.2209	19.688	0.612648	1.2311	2.46574	4.33692	2.10479	2.53119	3.41579	3.31629	1.43729	1.72033	8.18008	4.29248	7.33372	3.75938	4.03322	6.53954	8.34793	2.28755	3.51936	5.83326	12.8638	2.95507	3.84839	3.62438	7.08223	1.19066	2.22651	3.63399	1.97455
KCS_054	T	M	PU	67.9	35.64	ccRCC	pT1a	G2	N0M0	3.86542	6.53022	24.1101	20.4531	3.90515	13.9317	6.00559	6.62006	4.15066	3.07105	7.35699	6.73041	4.62668	0.952168	5.03468	2.49108	5.6086	1.79676	2.99251	4.92601	6.93899	0.92715	2.57671	5.81895	13.0701	1.9993	3.01754	2.89952	5.87539	3.47356	4.46281	7.56546	6.21562
KCS_055	T	M	PUT	40.5	27.45	ccRCC	pT1b	G1	N0M0	4.60103	9.46418	26.2	19.7275	4.98916	8.56308	3.24214	9.26618	3.03398	5.08745	5.82527	3.69742	2.58447	0.911091	6.47204	3.29512	6.3482	3.71993	2.12794	5.10339	6.95719	2.28211	4.16402	5.42658	13.5828	3.51182	4.86821	4.17449	10.3638	1.7167	2.69936	3.24796	2.7453
KCS_056	T	F	PUT	44.4	21.45	ccRCC	pT1b	G1	N0M0	8.67685	14.866	22.4016	14.9804	14.0368	2.06817	6.54063	7.42521	3.18106	1.74161	4.08166	4.87414	1.35853	1.16562	8.7328	5.02935	7.38512	3.1884	8.67185	9.05557	7.91081	2.42573	2.83062	4.95086	13.2061	3.24856	3.53383	2.60924	6.37532	0.477367	0.962185	0.995394	1.0126
KCS_058	T	M	PUT	64.1	29.07	ccRCC	pT2b	G3	N0M0	10.6056	10.6654	23.716	42.196	1.20447	2.18036	1.81124	1.73186	2.23566	0.25522	3.39817	2.46808	0.901656	1.20711	6.04124	2.8302	5.64006	4.64989	4.32771	6.12351	6.21712	3.18127	3.5323	4.48977	11.9971	5.23945	3.96807	4.29966	8.80539	1.56418	3.37503	4.97889	4.16229
KCS_059	T	F	PUT	66.6	30.12	chRCC	pT2a	Gx	N0M0	2.17275	8.35286	33.3077	26.6221	13.638	4.49512	2.13585	2.30032	3.58515	0.717902	2.6723	2.88734	1.14088	1.14088	5.3628	2.86591	6.33946	3.24782	2.69086	7.5492	6.80426	1.74426	4.30227	5.64129	17.3248	3.32637	5.9228	3.70537	13.4399	1.14088	1.14088	1.14088	1.14088
KCS_064	T	M	PUT	68.1	25.35	ccRCC	pT3a	G4 (sarcomatoid)	NxM1	9.51702	11.7555	24.7162	17.0073	3.54336	2.96511	7.76096	9.02264	5.01329	5.01337	3.68525	2.3415	0.521461	1.68827	5.06145	2.0936	3.04896	2.99333	5.76233	6.65792	3.39234	1.56972	1.41301	2.19002	7.59776	2.97847	1.98895	1.21854	4.85539	3.7819	10.9005	14.2	13.7446
KCS_066	T	M	PUT	64.1	22.09	ccRCC	pT3a	G4	N0M1	8.42347	9.70203	47.8689	17.5166	2.96247	2.57894	0.529506	3.3386	1.37646	1.00816	4.69485	3.68318	2.90548	0.522741	5.77524	2.89635	6.79118	4.48336	2.00753	4.55582	6.95866	2.26224	5.51298	4.1658	12.3392	3.22067	4.79059	3.53301	9.94911	2.90721	3.12977	4.03987	3.57007
KCS_069	T	M	PUT	59.9	24.54	ccRCC	pT3a	G2	N0M0	6.04877	14.0673	30.801	34.4738	1.54813	6.30324	0.914139	1.26228	1.58287	1.07487	1.92363	2.54784	1.47401	0.792622	6.76623	4.11891	7.71126	3.61634	2.2379	6.56185	8.31368	2.37194	4.53094	4.68018	15.1469	3.17678	4.52999	3.14326	8.66463	0.851804	3.41026	2.29346	3.05916
KCS_070	T	M	PU	56.1	26.6	ccRCC	pT1b	G2	N0M0	1.07841	5.33151	21.282	12.8654	1.71148	7.84167	12.7163	10.8331	8.95933	8.32833	9.05242	1.9783	1.03209	0.589824	6.15375	3.68027	6.38696	3.17452	2.35764	7.42869	7.51047	2.16614	3.27813	5.37271	15.9149	4.18689	4.11176	2.45238	8.89153	1.52498	3.33939	3.43361	5.03511
KCS_072	T	F	PUT	57.1	24.03	chRCC	pT2b	G3-4	N0M0	2.09238	14.6062	34.186	38.7613	0.838209	1.71064	0.852985	1.46657	1.4202	1.13858	2.92693	1.85017	1.22044	0.765663	5.37501	3.70603	6.82685	3.3434	2.74709	6.75105	8.59836	2.78765	3.41341	4.1325	17.1286	3.80703	4.2948	3.04419	9.243	0.977294	3.06663	2.62189	4.29896
KCS_074	T	M	PUT	71.9	21.72	ccRCC	pT3a	G3	N1M0	2.75567	9.77893	46.876	24.9583	1.20816	4.75326	0.807708	1.35671	2.26147	1.61703	3.62672	4.16224	2.22877	1.07175	4.82024	1.89691	3.47731	1.3496	5.5065	6.23797	4.03593	0.978772	0.712052	3.15034	7.5753	1.96568	0.97793	1.37721	2.64965	7.19901	10.4237	16.9415	11.2616
KCS_075	T	M	PUT	75.7	26.23	ccRCC	pT2a	G3	N0M0	5.44579	8.8857	40.3968	32.6106	0.472033	8.93893	0.189257	0.368315	0.845493	0.442423	1.40463	2.64208	1.86468	0.423083	5.87973	3.52858	6.07288	4.12944	1.71582	5.72237	7.58641	2.64176	3.9493	3.35956	14.1631	4.14006	4.69276	2.55457	9.8733	2.09473	3.74946	3.99967	5.21667
KCS_076	T	M	PUT	61.1	27.64	ccRCC	pT3a	G3	N0M0	2.55943	9.92283	24.9797	31.7054	4.97779	11.8266	0.373167	4.62329	0.442975	1.54078	7.04814	1.27877	0.724951	0.724951	4.51127	1.74601	4.73163	6.84738	0.791002	4.26606	5.21809	4.91588	4.62501	3.20987	12.403	12.2819	6.1829	5.23355	17.4079	0.724951	0.724951	0.724951	0.724951
KCS_077	T	M	PUT	69.9	25.15	ccRCC	pT1b	G2	N0M0	4.19523	10.7984	36.099	23.9517	1.11984	3.11708	3.01536	4.8067	2.41499	9.3619	1.11984	1.76099	0.982401	0.719373	7.23714	3.71779	7.82372	3.94486	1.2532	6.135	9.6692	2.75286	3.73838	5.64282	18.5625	4.04721	4.72002	2.86621	10.4015	0.719373	0.902284	0.851281	1.55186
KCS_144	T	M	UT	50.1	33.77	ccRCC	pT3a	G2	N0M0	1.90871	5.84696	55.0036	22.4674	0.201806	2.9274	1.47249	1.56947	3.97446	0.279342	4.34828	3.48307	2.53867	1.04777	5.75935	3.49253	6.89243	2.96003	2.22993	6.2225	8.11235	1.89739	4.06971	5.62096	17.2739	2.87444	4.11788	2.71108	8.58506	1.28869	2.40146	3.04183	3.37897
KCS_078	T	M	PUT	55.3	28.53	ccRCC	pT3a	G4 (sarcomatoid)	N2M0	8.96834	15.3434	26.5044	33.104	0.446344	1.6705	2.83971	2.36159	3.06442	3.57174	2.12555	2.59886	1.08438	0.765631	6.17626	4.15323	4.8089	3.47404	3.93721	7.62936	6.67779	2.39838	2.74244	4.70023	12.7074	3.53051	3.31767	2.33023	6.65206	2.14292	4.41862	6.98502	6.7689
KCS_079	T	F	PU	73.3	36.39	ccRCC	pT3a	G4 (sarcomatoid)	N0M1	3.05268	8.06649	33.2579	21.241	1.57644	15.9568	2.7538	7.54455	1.60868	1.19	3.7516	3.38183	1.58957	2.22157	6.0756	3.17199	4.86931	3.02792	6.41851	7.07044	5.60095	1.99425	3.24099	4.57903	11.0516	3.04364	3.5842	2.56182	6.88403	1.89415	5.82508	6.38099	5.53254
KCS_080	T	M	PU	73.5	29.3	ccRCC	pT2a	G3	N0M0	2.67708	5.63159	35.6008	37.0764	0.465146	3.96665	1.40278	2.81508	3.11136	2.21765	5.03547	4.05222	1.92881	1.39556	7.84291	4.19899	6.77386	4.32779	3.35912	6.11083	7.89671	3.1102	3.37948	6.13356	13.6132	3.99425	4.07199	3.5347	7.81243	1.03174	1.78385	2.27932	1.36849
KCS_081	T	M	PU	50.5	34.48	ccRCC	pT1b	G1	N0M0	3.252	12.5053	30.1405	35.4802	3.44314	1.16197	4.91356	2.12297	2.90491	3.05343	1.02197	2.12661	1.85635	1.85635	6.44354	2.39786	8.33176	2.75937	1.85635	5.46385	8.39778	1.85635	3.05755	4.84985	17.1087	1.85635	2.90253	1.85635	7.70197	3.39646	3.39498	5.18257	5.34656
KCS_082	T	F	PU	70.7	44.82	ccRCC	pT3a	G3	N0M0	2.49914	8.19453	46.5418	24.0627	8.77272	5.2517	0.705682	0.705682	0.705682	0.705682	1.85467	2.19735	1.41179	1.41179	7.37852	3.16205	6.69369	4.54322	3.89587	7.6018	6.73914	2.1793	2.83768	5.0863	15.1953	3.841	4.1314	3.71449	9.73091	1.41179	1.52095	2.63319	2.6825
KCS_083	T	F	PU	73.1	21.09	ccRCC	pT3b	G3	N1M0	1.56417	6.34466	46.1244	20.3389	10.3026	8.34039	0.759442	2.8734	0.875953	0.749681	1.72636	5.43671	2.29064	2.1727	7.73471	4.39288	5.63515	3.89086	6.01299	8.48538	6.75482	2.61436	2.27583	5.51488	12.5323	3.69425	2.82664	2.80147	5.80567	0.936578	2.18008	2.98316	3.02793
KCS_084	T	M	PU	72.7	31.31	ccRCC	pT3a	G3	N1M1	3.87706	8.57478	43.2743	8.4514	3.07622	8.53715	5.70893	5.43244	5.8488	3.28773	3.93116	2.75314	3.16512	1.24887	4.76349	1.68823	4.01501	1.5493	11.3441	7.5584	5.48212	1.24887	1.24887	3.52743	12.8041	1.56347	1.97828	1.24887	6.13361	2.77329	3.93534	13.163	6.80718
KCS_085	T	M	PU	70.4	24.11	ccRCC	pT3a	G3	N2M1	6.23413	6.77452	36.0256	13.6072	3.79646	3.50098	9.82282	7.6872	6.68097	1.7949	4.07526	2.17063	0.727558	0.818923	7.21145	3.40284	6.20619	5.91969	2.5795	7.23642	5.90558	3.66503	3.64357	3.82985	13.008	6.64028	3.86451	3.20624	9.42164	0.605865	3.00332	3.08682	3.84605
KCS_086	T	F	PU	75.3	30.86	ccRCC	pT1a	G2	N0M0	2.59299	6.55264	25.3856	14.8067	10.1836	1.27083	15.0439	6.83653	5.62286	9.37516	2.32935	2.70882	1.42113	0.890149	6.11923	3.22003	6.22768	3.02823	3.63977	7.94381	7.44261	2.05134	3.44096	5.57161	18.2083	4.30335	4.15606	3.14538	9.92363	0.854487	1.65787	1.55286	2.49274
KCS_087	T	M	PU	40.6	36.57	ccRCC	pT3a	G3	N0M0	6.91283	9.24144	22.6503	32.8364	9.05963	8.27464	1.71719	1.56521	3.08063	1.86597	2.79579	2.86327	1.81231	1.23184	6.74607	3.40788	7.35566	4.18287	2.88307	6.46938	7.63041	2.61473	4.00465	5.5124	14.6548	4.21112	4.20291	3.77585	9.31607	0.811427	1.99256	2.41067	1.91005
KCS_088	T	F	PU	78.8	23.81	ccRCC	pT1a	G2	N0M0	3.0983	16.3851	36.8102	18.9516	2.96276	4.6014	1.94866	5.22401	2.81126	3.02606	4.18064	4.09084	2.27889	0.725426	7.52178	4.17867	6.6246	4.41839	1.99822	7.21495	8.04138	2.87728	3.62795	5.0636	15.4741	3.98167	4.6017	3.35985	11.019	0.725426	0.725426	0.725426	0.725426
KCS_089	T	M	PU	65.3	25.14	ccRCC	pT1b	G3	N0M0	1.34853	7.51339	27.9778	26.5392	0.708078	1.3475	9.78729	13.2619	3.75422	2.05601	5.70608	3.80721	2.50668	1.55921	7.43986	3.63671	6.92091	3.61572	3.74644	5.40506	7.25784	2.23613	3.38948	4.54379	11.5903	2.844	3.7328	2.51409	6.18353	2.2938	5.05428	5.47622	4.24601
KCS_090	T	M	PU	76.3	34.95	ccRCC	pT3a	G3	N0M0	3.40453	7.43324	45.0585	20.0086	2.54918	7.40635	1.30927	2.53195	3.31066	2.93305	4.05471	2.53475	1.48275	1.15645	6.82579	3.79104	6.20281	4.11293	3.53228	5.89731	6.63317	3.0631	4.07853	5.18476	13.3341	3.97908	4.97566	3.62528	8.5931	1.03802	3.15037	3.8615	2.94718
KCS_091	T	F	PU	68.2	34.53	ccRCC	pT2a	G1	N0M0	1.45177	7.42266	19.7137	27.0954	7.30694	14.7685	5.72405	1.67889	9.6341	1.36909	3.83488	3.43714	1.31628	0.861066	6.81945	3.37342	7.52114	3.05891	3.58829	7.16746	8.66477	1.35489	3.08775	6.35484	15.7233	2.34864	3.56825	2.95607	8.52152	1.40941	3.03329	2.5965	3.23759
KCS_092	T	F	PU	61.7	34.21	ccRCC	pT2a	G1-2	N0M0	1.55902	5.22542	47.3319	19.9947	12.3773	7.39201	0.770779	1.32038	0.639616	0.332645	3.05625	7.60331	3.91386	0.964611	7.08056	3.48238	5.70416	2.85961	3.20932	5.49798	6.70042	1.18055	2.53406	7.82935	15.2406	2.95608	2.99474	3.59031	7.28834	1.43268	2.18639	3.51647	2.23419
[truncated: 19 more rows]

## Sheet: Data S1F
Data S1F. Clinical data together with relative concentrations [% for classes - SM, SHexCer] of individual lipids measured in tissue samples. Explanation of abbreviations is as follows: N - nonneoplastic tissue, T - tumor tissue, UNK - unknown, QC - quality control, M - males, F - females, ccRCC - clear cell renal cell carcinoma, papRCC - papillary renal cell carcinoma, chRCC - chromosome renal ce…
[truncated: 155 more rows]
[truncated: 4 more columns]

[truncated: 3 more sheets: Data S1G, Data S1H, Data S1I]
