# Supplementary material for: Altered Plasma, Urine, and Tissue Profiles of Sulfatides and Sphingomyelins in Patients with Renal Cell Carcinoma
Source: Cancers (Basel). 2022 Sep 23;14(19):4622. doi: 10.3390/cancers14194622 (PMC9563753; doi:10.3390/cancers14194622)
Supplement: Supplementary file 1 [file cancers-14-04622-s001.zip › cancers-1894222-supplementary/Supplementary_Data_S2_Cancers.xlsm]

## Sheet: Table of contents
Supplementary Data S2. Statistical calculations supporting the article "Altered plasma, urine, and tissue profiles of sulfatides and sphingomyelins in patients with renal cell carcinoma"
Table of contents
Data S2A	Results of the statistical calculations for individual lipids in plasma (relative concentrations)
Data S2B	Results of the statistical calculations for individual lipids in plasma (molar concentrations)
Data S2C	Results of the statistical calculations for present/absent approach in plasma
Data S2D	Results of the statistical calculations for individual lipids in urine (relative concentration)
Data S2E	Results of the statistical calculations for present/absent approach in urine
Data S2F	Comparison of relative concentrations of lipids in plasma samples of controls, RCC patients with early tumor stage (T1-2), and RCC patients withmore advanced tumor stage (T3-4)
Data S2G	Comparison of relative concentrations of lipids in plasma samples of controls, RCC patients with G1-2 cancer tumor grade, and RCC patients with G3-4 tumor grade
Data S2H	Comparison of relative concentrations of lipids in urine samples of controls, RCC patients with early tumor stage (T1-2), and RCC patients with more advanced tumor stage (T3-4)
Data S2I	Comparison of relative concentrations of lipids in urine samples of controls, RCC patients with G1-2 tumor grades, and RCC patients with G3-4 tumor grades
Data S2J	Comparison of relative concentrations of individual lipids in tissue samples
Data S2K	Results of the statistical calculations for present/absent approach in tissue
Data S2L	Results of the statistical calculations for tissue samples - tumor stages analysis N vs. T1-2
Data S2M	Results of the statistical calculations for tissue samples - tumor stages analysis N vs. T3-4
Data S2N	Results of the statistical calculations for tissue samples - tumor grades analysis N vs. G1-2
Data S2O	Results of the statistical calculations for tissue samples - tumor grades analysis N vs. G3-4
Data S2P	Comparison of relative concentrations of lipids in the plasma of patients with T3 tumor stage with metastases vs. without metastases
Data S2Q	Comparison of relative concentrations of lipids in the urine of patients with T3 tumor stage with metastases vs. without metastases.
Data S2R	Spearman correlation heatmap showing values of positive (red) and negative (blue) correlations between individual lipids studied and age (or BMI) in plasma samples
Data S2S	ROC analysis for individual lipids
Data S2T	Individual values of accuracy, sensitivity and specificity showing the performance of the logistic regression with ridge penalty for training and testing data sets

## Sheet: Data S2A
Data S2A. Results of the statistical calculations for individual lipids in plasma (relative concentrations). Comparison of RCC patients (T) and controls (N) using the Mann–Whitney U test.
No.	Lipid species	group 1	group 2	n1	n2	median N	IQR N	median T	IQR T	log2(FC) T/N	Robust FC (Hodges-Lehman)	Significance log2(FC)	W-Mann-Whitney	p.val	FDR	Significance p.val	effect size [rank-biserial correlation]	Low 95% CI	Upper 95% CI	Effect size significance	Overall significance				Overall significance
1	SHexCer 34:1;O2	N	T	207	143	16.928	3.804	16.634	5.559	-0.0252764	0.0013463		14756	0.962	0.962		-0.00301	-0.125	0.133				FDR significance
2	SHexCer 34:1;O3	N	T	207	143	31.459	4.23	31.857	6.915	0.0181376	0.0216063		13821	0.293	0.345321		-0.0662	-0.199	0.0736				0.05-0.01	*	-
3	SHexCer 40:1;O2	N	T	207	143	3.236	1.161	2.431	1.433	-0.412662	-0.333521	*	19995	2.38e-08	5.61e-08	****	0.351	0.226	0.475		**		0.01-0.001	**	*
4	SHexCer 40:1;O3	N	T	207	143	7.788	1.613	6.919	2.541	-0.170689	-0.225315		20754	1.58e-10	6.5175e-10	****	0.402	0.285	0.521		*		0.001-0.0001	***
5	SHexCer 40:2;O3	N	T	207	143	1.586	0.769	1.484	0.769	-0.0959017	-0.0399828		15395	0.523	0.556742		0.0402	-0.0867	0.16				0.0001 and lower	****
6	SHexCer 41:1;O3	N	T	207	143	5.741	1.456	4.108	2.019	-0.482866	-0.49144	*	23920	1.12e-22	1.848e-21	****	0.616	0.52	0.704	*	***
7	SHexCer 42:1;O2	N	T	207	143	2.273	0.932	2.242	1.384	-0.0198114	-0.0614159		15660	0.356	0.405103		0.0581	-0.0721	0.183
8	SHexCer 42:1;O3	N	T	207	143	9.624	1.594	8.788	2.949	-0.131102	-0.124191		18802	1.71e-05	2.97e-05	****	0.27	0.143	0.393		*		Effect size significance
9	SHexCer 42:2;O2	N	T	207	143	5.482	1.823	6.32	2.807	0.205222	0.250543		10089	4.13e-07	8.51812e-07	****	-0.318	-0.433	-0.195		*
10	SHexCer 42:2;O3	N	T	207	143	12.298	2.102	13.204	3.44	0.102551	0.0861549		11964	0.00231	0.00331435	**	-0.192	-0.311	-0.0718		*		±0.0-0.2	No effect	-
11	SHexCer 42:3;O2	N	T	207	143	1.525	0.99	1.913	1.726	0.327028	0.464244	*	9916	1.53e-07	3.366e-07	****	-0.33	-0.44	-0.218		**		±0.2-0.5	Small
12	SHexCer 42:3;O3	N	T	207	143	1.206	0.699	1.406	0.899	0.221367	0.27195		11206	0.000112	0.0001848	***	-0.243	-0.364	-0.12		*		±0.5-0.8	Medium	*
13	SM 32:1;O2	N	T	207	143	2.238	0.567	1.826	0.608	-0.293523	-0.308059	*	22378	3.86e-16	3.1845e-15	****	0.512	0.397	0.608	*	***		±0.8-1	Large	**
14	SM 33:1;O2	N	T	207	143	1.442	0.362	1.118	0.434	-0.367151	-0.327142	*	22319	6.5e-16	4.29e-15	****	0.508	0.405	0.609	*	***
15	SM 34:0;O2	N	T	207	143	1.295	0.275	1.233	0.287	-0.0707793	-0.0779908		17370	0.00576	0.0076032	**	0.174	0.0489	0.294		*
16	SM 34:1;O2	N	T	207	143	33.82	3.884	35.728	4.152	0.0791785	0.0716181		10139	5.47e-07	1.06182e-06	****	-0.315	-0.433	-0.199		*		Fold change
17	SM 34:2;O2	N	T	207	143	2.81	0.638	2.845	0.714	0.0178585	0.0403276		13556	0.181	0.221222		-0.0841	-0.208	0.0364				log2(FC) < -0.3 or log2(FC) > 0.3		*
18	SM 35:1;O2	N	T	207	143	1.252	0.27	1.125	0.232	-0.15431	-0.154542		20116	1.12e-08	2.84308e-08	****	0.359	0.24	0.482		*
19	SM 36:0;O2	N	T	207	143	0.217	0.159	0.211	0.221	-0.040452	0.0192603		14630	0.855	0.881719		-0.0115	-0.137	0.122
20	SM 36:1;O2	N	T	207	143	6.053	1.246	6.388	1.609	0.077714	0.0813329		12167	0.00466	0.0064075	**	-0.178	-0.304	-0.0487		*		Total significance:		*	Small
21	SM 36:2;O2	N	T	207	143	1.88	0.568	1.947	0.716	0.0505202	0.072838		13241	0.0938	0.119054		-0.105	-0.229	0.0239						**	Medium
22	SM 37:1;O2	N	T	207	143	0.749	0.179	0.653	0.174	-0.197883	-0.19524		20182	7.34e-09	2.0185e-08	****	0.364	0.248	0.473		*				***	Large
23	SM 38:1;O2	N	T	207	143	4.157	0.815	3.766	0.608	-0.14251	-0.142385		20497	9.27e-10	3.399e-09	****	0.385	0.275	0.489		*				****	Very large
24	SM 38:2;O2	N	T	207	143	1.34	0.368	1.315	0.376	-0.0271702	-0.026729		15516	0.442	0.4862		0.0483	-0.0773	0.168
25	SM 39:1;O2	N	T	207	143	1.35	0.345	0.947	0.364	-0.511523	-0.520167	*	24561	9.71e-26	3.2043e-24	****	0.659	0.572	0.739	*	***
26	SM 40:1;O2	N	T	207	143	7.737	1.343	7.132	1.678	-0.117468	-0.150014		20315	3.11e-09	1.0263e-08	****	0.373	0.252	0.486		*
27	SM 40:2;O2	N	T	207	143	4.557	0.732	4.065	0.819	-0.164829	-0.13533		20274	4.06e-09	1.218e-08	****	0.37	0.26	0.483		*
28	SM 41:1;O2	N	T	207	143	3.257	0.643	2.623	0.707	-0.312326	-0.303571	*	23608	2.94e-21	3.234e-20	****	0.595	0.489	0.681	*	***
29	SM 41:2;O2	N	T	207	143	2.151	0.415	1.818	0.467	-0.242655	-0.224602		21475	7.36e-13	3.46971e-12	****	0.451	0.339	0.555		*
30	SM 42:1;O2	N	T	207	143	4.914	1.013	4.495	1.284	-0.128577	-0.139915		18923	9.43e-06	1.72883e-05	****	0.279	0.151	0.394		*
31	SM 42:2;O2	N	T	207	143	13.245	2.285	14.966	2.575	0.176241	0.17662		7753	3.64e-14	2.002e-13	****	-0.476	-0.585	-0.36		*
32	SM 42:3;O2	N	T	207	143	4.579	1.159	4.904	1.297	0.0989264	0.103594		11735	0.000988	0.001482	**	-0.207	-0.328	-0.0945		*
33	SM 43:2;O2	N	T	207	143	0.588	0.259	0.499	0.314	-0.236776	-0.206545		17908	0.000841	0.00132157	**	0.21	0.0882	0.331		*

## Sheet: Data S2B
Data S2B. Results of the statistical calculations for individual lipids in plasma (molar concentrations). Comparison of RCC patients (T) and controls (N) using the Mann–Whitney U test.
No.	Lipid species	group 1	group 2	n1	n2	median N	IQR N	median T	IQR T	log2(FC) T/N	FC significance	W-Mann-Whitney	p.val	p.adj (FDR)	FDR significance	effect size [rank-biserial correlation]	CI-95%	Effect size significance	Overall significance					Overall significance
1	SHexCer 34:1;O2	N	T	207	143	0.247	0.13	0.145	0.139	-0.768458	*	22674.5	2.64e-17	5.61e-17	*	0.532	[0.43; 0.63]	*	***			FDR significance
2	SHexCer 34:1;O3	N	T	207	143	0.471	0.232	0.248	0.243	-0.925387	*	22790	9.03e-18	2.0468e-17	*	0.54	[0.43; 0.65]	*	***			0.05-0.01	*	-
3	SHexCer 34:2;O3	N	T	207	143	0.04	0.029	0.016	0.032	-1.32193	*	22124	3.45e-15	6.17368e-15	*	0.495	[0.38; 0.60]	*	***			0.01-0.001	**	*
4	SHexCer 40:1;O2	N	T	207	143	0.049	0.03	0.017	0.039	-1.52725	*	22299.5	7.44e-16	1.40533e-15	*	0.507	[0.38; 0.61]	*	***			0.001-0.0001	***
5	SHexCer 40:1;O3	N	T	207	143	0.118	0.064	0.054	0.072	-1.12776	*	22969	1.66e-18	4.34154e-18	*	0.552	[0.44; 0.66]	*	***			0.0001 and lower	****
6	SHexCer 41:1;O3	N	T	207	143	0.087	0.05	0.031	0.05	-1.48875	*	23700	1.13e-21	7.684e-21	*	0.601	[0.49; 0.70]	*	***
7	SHexCer 42:1;O2	N	T	207	143	0.036	0.027	0.015	0.032	-1.26303	*	20940	3.96e-11	5.17846e-11	*	0.415	[0.29; 0.54]		**
8	SHexCer 42:1;O3	N	T	207	143	0.144	0.074	0.07	0.084	-1.04064	*	22858	4.77e-18	1.15843e-17	*	0.544	[0.43; 0.66]	*	***			Effect size significance
9	SHexCer 42:2;O2	N	T	207	143	0.082	0.054	0.056	0.071	-0.550197	*	19234.5	1.89e-06	2.00812e-06	*	0.3	[0.17; 0.42]		**
10	SHexCer 42:2;O3	N	T	207	143	0.188	0.091	0.111	0.106	-0.760173	*	21556.5	3.87e-13	5.2632e-13	*	0.456	[0.34; 0.58]		**			±0.0-0.2	No effect	-
11	SHexCer 42:3;O2	N	T	207	143	0.02	0.024	0.014	0.028	-0.514573	*	17573.5	0.00283	0.00283	*	0.187	[0.07; 0.31]		**			±0.2-0.5	Small
12	SM 32:1;O2	N	T	207	143	14.935	6.286	7.05	6.369	-1.083	*	24818	5.03e-27	8.551e-26	*	0.677	[0.59; 0.76]	*	***			±0.5-0.8	Medium	*
13	SM 33:1;O2	N	T	207	143	9.366	4.591	4.708	4.083	-0.992319	*	24453	3.29e-25	2.7965e-24	*	0.652	[0.56; 0.74]	*	***			±0.8-1	Large	**
14	SM 34:0;O2	N	T	207	143	9.047	4.014	5.055	4.229	-0.839728	*	22652	3.24e-17	6.48e-17	*	0.53	[0.42; 0.64]	*	***
15	SM 34:1;O2	N	T	207	143	227.968	97.071	147.919	115.357	-0.624024	*	22039	7.33e-15	1.2461e-14	*	0.489	[0.38; 0.60]		**
16	SM 34:2;O2	N	T	207	143	18.633	10.172	10.988	9.663	-0.761931	*	21614	2.45e-13	3.51333e-13	*	0.46	[0.34; 0.57]		**			Fold change
17	SM 35:1;O2	N	T	207	143	8.355	3.719	4.747	3.914	-0.815624	*	23299.5	6.65e-20	2.05545e-19	*	0.574	[0.47; 0.67]	*	***			log2(FC) < -0.3 or log2(FC) > 0.3		*
18	SM 36:0;O2	N	T	207	143	1.427	1.482	0.862	1.143	-0.727226	*	19106	3.67e-06	3.78121e-06	*	0.291	[0.17; 0.42]		**
19	SM 36:1;O2	N	T	207	143	40.09	16.549	26.833	22.135	-0.579234	*	21639	2e-13	3.09091e-13	*	0.462	[0.35; 0.58]		**
20	SM 36:2;O2	N	T	207	143	12.365	7.506	7.61	6.797	-0.700294	*	20492	9.59e-10	1.12434e-09	*	0.385	[0.27; 0.50]		**			Total significance:		*	Small
21	SM 37:1;O2	N	T	207	143	4.904	2.431	2.713	2.226	-0.85407	*	23373.5	3.18e-20	1.0812e-19	*	0.579	[0.48; 0.68]	*	***					**	Medium
22	SM 38:1;O2	N	T	207	143	27.673	11.226	14.332	12.294	-0.949239	*	23634	2.25e-21	1.275e-20	*	0.597	[0.50; 0.70]	*	***					***	Large
23	SM 38:2;O2	N	T	207	143	8.963	4.748	5.149	4.773	-0.799689	*	21870	3.03e-14	4.90571e-14	*	0.478	[0.36; 0.59]		**					****	Very large
24	SM 39:1;O2	N	T	207	143	8.883	4.327	3.564	4.071	-1.31755	*	25071	2.53e-28	8.602e-27	*	0.694	[0.59; 0.78]	*	***
25	SM 40:1;O2	N	T	207	143	53.29	24.033	27.52	23.262	-0.953384	*	23520	7.24e-21	3.51657e-20	*	0.589	[0.48; 0.69]	*	***
26	SM 40:2;O2	N	T	207	143	29.499	15.499	15.296	14.515	-0.947512	*	23052	7.5e-19	2.125e-18	*	0.558	[0.45; 0.67]	*	***
27	SM 40:3;O2	N	T	207	143	1.423	1.635	0.681	1.119	-1.06321	*	20221	5.14e-09	5.82533e-09	*	0.366	[0.25; 0.47]		**
28	SM 41:1;O2	N	T	207	143	21.502	10.543	9.745	8.847	-1.14174	*	24474	2.6e-25	2.7965e-24	*	0.654	[0.55; 0.75]	*	***
29	SM 41:2;O2	N	T	207	143	13.594	7.449	6.874	6.853	-0.983748	*	23495	9.33e-21	3.96525e-20	*	0.587	[0.49; 0.69]	*	***
30	SM 41:3;O2	N	T	207	143	1.709	1.517	1.021	1.285	-0.74317	*	20213.5	5.87e-09	6.43806e-09	*	0.366	[0.25; 0.48]		**
31	SM 42:1;O2	N	T	207	143	33.847	15.298	16.853	16.233	-1.00602	*	23392	2.64e-20	9.97333e-20	*	0.58	[0.47; 0.68]	*	***
32	SM 42:2;O2	N	T	207	143	86.422	41.403	58.727	49.528	-0.557375	*	20700	2.3e-10	2.79286e-10	*	0.399	[0.28; 0.52]		**
33	SM 42:3;O2	N	T	207	143	29.904	16.87	18.777	17.662	-0.671372	*	20707	2.19e-10	2.75778e-10	*	0.399	[0.28; 0.51]		**
34	SM 43:2;O2	N	T	207	143	3.822	2.519	1.973	2.356	-0.953937	*	21612	2.48e-13	3.51333e-13	*	0.46	[0.35; 0.57]		**
35	SHexCer 34:0;O3																		down regulation
36	SHexCer 34:2;O2																		down regulation
37	SHexCer 40:2;O2																		down regulation
38	SHexCer 40:2;O3																		down regulation
39	SHexCer 41:1;O2																		down regulation
40	SHexCer 41:2;O3																		down regulation
41	SHexCer 42:1;O4																		down regulation
42	SHexCer 42:3;O3																		down regulation
43	SM 43:1;O2																		down regulation

## Sheet: Data S2C
Data S2C. Results of the statistical calculations - present/absent approach in plasma (Fisher’s exact test).
SM 43:1;O2	N	T		SHexCer 34:2;O2	N	T		SHexCer 34:0;O3	N	T
Present	156	50		Present	136	56		Present	193	72
Absent	51	93		Absent	71	87		Absent	14	71
p-value Fisher's exact test	5.1e-14			p-value Fisher's exact test	1.3e-06			p-value Fisher's exact test	<2.2E-16
Odds ratio; 95% CI	5.7	3.5-9.3		Odds ratio; 95% CI	3	1.9-4.7		Odds ratio; 95% CI	13.5	7.0-27.6
FDR	2.2e-13			FDR	2.4e-06			FDR	1.4e-15
SHexCer 36:1;O2	N	T		SHexCer 40:2;O2	N	T		SHexCer 41:2;O2	N	T
Present	31	9		Present	166	69		Present	36	13
Absent	176	134		Absent	41	74		Absent	171	130
p-value Fisher's exact test	0.01587			p-value Fisher's exact test	5.4e-10			p-value Fisher's exact test	0.02895
Odds ratio; 95% CI	2.6	1.2-6.5		Odds ratio; 95% CI	4.3	2.6-7.2		Odds ratio; 95% CI	2.1	1.0-4.5
FDR	0.023			FDR	1.4e-09			FDR	0.038
SHexCer 41:1;O2	N	T		SHexCer 40:0;O3	N	T		SHexCer 41:2;O3	N	T
Present	164	44		Present	22	7		Present	141	45
Absent	43	99		Absent	185	136		Absent	66	98
p-value Fisher's exact test	<2.2E-16			p-value Fisher's exact test	0.0747			p-value Fisher's exact test	1.7e-11
Odds ratio; 95% CI	8.5	5.1-14.4		Odds ratio; 95% CI	2.3	0.9-6.6		Odds ratio; 95% CI	4.6	2.9-7.6
FDR	1.4e-15			FDR	0.075			FDR	5.5e-11
SHexCer 40:0;O4	N	T		SHexCer 42:2;O4	N	T		SHexCer 42:0;O4	N	T
Present	24	8		Present	23	7		Present	45	14
Absent	183	135		Absent	184	136		Absent	162	129
p-value Fisher's exact test	0.06083			p-value Fisher's exact test	0.05134			p-value Fisher's exact test	0.00352
Odds ratio; 95% CI	2.2	0.9-5.9		Odds ratio; 95% CI	2.4	1.0-6.9		Odds ratio; 95% CI	2.6	1.3-5.3
FDR	0.066			FDR	0.06			FDR	0.0057
SHex2Cer 42:2;O2	N	T
Present	2	24
Absent	205	119
p-value Fisher's exact test	1.9e-08
Odds ratio; 95% CI	0.05	0.005-0.2
FDR	4.1e-08

## Sheet: Data S2D
Data S2D. Results of the statistical calculations for individual lipids in urine (relative concentration). Comparison of RCC patients (T) and controls (N) using the Mann–Whitney U test.
No.	Lipid species	group 1	group 2	n1	n2	median N	IQR N	median T	IQR T	log2(FC) T/N	Robust FC (Hodges-Lehman)	Significance log2(FC)	W-Mann-Whitney	p.val	FDR	Significance p.val	effect size [rank-biserial correlation]	Low 95% CI	Upper 95% CI	Effect size significance	Overall significance				Overall significance
1	SHex2Cer 34:1;O2	N	T	67	76	1.052	0.738	1.458	1.428	0.470856	0.541592	*	1738	0.00109	0.002398	**	-0.317	-0.49	-0.133		**		FDR significance
2	SHex2Cer 40:1;O2	N	T	67	76	1.494	0.941	2.285	2.025	0.613014	0.677321	*	1433	6.78e-06	3.729e-05	****	-0.437	-0.59	-0.268		**		0.05-0.01	*	-
3	SHex2Cer 42:1;O2	N	T	67	76	1.471	1.128	2.714	2.708	0.883623	0.815628	*	1331	8.96e-07	5.9136e-06	****	-0.477	-0.647	-0.305		**		0.01-0.001	**	*
4	SHex2Cer 42:2;O2	N	T	67	76	1.379	1.225	2.881	2.53	1.06295	0.942681	*	1269	2.42e-07	2.64e-06	****	-0.502	-0.658	-0.323	*	***		0.001-0.0001	***
5	SHexCer 34:1;O2	N	T	67	76	3.63	1.542	3.409	1.776	-0.0906209	-0.0479615		2655	0.661	0.661		0.0428	-0.144	0.244				0.0001 and lower	****
6	SHexCer 34:1;O3	N	T	67	76	2.252	1.091	1.68	1.248	-0.422746	-0.328052	*	3222	0.00628	0.010362	*	0.266	0.0815	0.444		*
7	SHexCer 40:0;O3	N	T	67	76	4.088	0.691	3.616	1.205	-0.177001	-0.185865		3371	0.000852	0.00200829	**	0.324	0.138	0.484		*
8	SHexCer 40:0;O4	N	T	67	76	4.434	1.276	3.556	1.338	-0.318353	-0.345885	*	3810	3.2e-07	2.64e-06	****	0.496	0.346	0.661	*	***		Effect size significance
9	SHexCer 40:1;O2	N	T	67	76	6.856	1.272	6.467	1.216	-0.0842705	-0.0817142		3101	0.0249	0.03735	*	0.218	0.0323	0.391
10	SHexCer 40:1;O3	N	T	67	76	7.274	1.427	6.344	1.25	-0.197356	-0.220393		3917	2.95e-08	9.735e-07	****	0.538	0.378	0.682	*	**		±0.0-0.2	No effect	-
11	SHexCer 40:2;O2	N	T	67	76	0.961	0.504	1.023	0.477	0.0901978	0.0470132		2419	0.609	0.639375		-0.0499	-0.233	0.14				±0.2-0.5	Small
12	SHexCer 41:0;O3	N	T	67	76	2.652	0.648	2.284	0.759	-0.215518	-0.197596		3397	0.00058	0.001595	**	0.334	0.142	0.516		*		±0.5-0.8	Medium	*
13	SHexCer 41:0;O4	N	T	67	76	4.879	1.207	4.144	1.134	-0.235561	-0.247492		3648	8.35e-06	3.93643e-05	****	0.433	0.245	0.598		*		±0.8-1	Large	**
14	SHexCer 41:1;O2	N	T	67	76	3.493	0.686	3.371	1.067	-0.05129	-0.0930384		2994	0.0702	0.092664		0.176	-0.00674	0.356
15	SHexCer 41:1;O3	N	T	67	76	8.153	1.112	6.994	1.701	-0.221213	-0.208334		3876	7.51e-08	1.23915e-06	****	0.522	0.355	0.679	*	**
16	SHexCer 42:0;O3	N	T	67	76	3.478	0.937	3.504	1.251	0.0107448	0.0438816		2364	0.463	0.5093		-0.0715	-0.27	0.116				Fold change
17	SHexCer 42:0;O4	N	T	67	76	9.802	2.125	8.757	2.73	-0.162639	-0.160825		3247	0.0046	0.00798947	**	0.275	0.0918	0.456		*		log2(FC) < -0.3 or log2(FC) > 0.3		*
18	SHexCer 42:1;O2	N	T	67	76	5.297	1.298	6.456	2.079	0.285465	0.230359		1645	0.00027	0.00081	***	-0.354	-0.537	-0.17		*
19	SHexCer 42:1;O3	N	T	67	76	14.302	2.058	13.387	3.824	-0.0953842	-0.0410075		2786	0.333	0.378931		0.0943	-0.0976	0.296
20	SHexCer 42:1;O4	N	T	67	76	3.71	1.26	3.144	1.208	-0.238818	-0.223335		3247	0.0046	0.00798947	**	0.275	0.0976	0.449		*		Total significance:		*	Small
21	SHexCer 42:2;O2	N	T	67	76	2.167	0.955	2.885	1.871	0.412872	0.478745	*	1493	2.06e-05	8.4975e-05	****	-0.414	-0.564	-0.231		**				**	Medium
22	SHexCer 42:2;O3	N	T	67	76	5.426	1.751	5.098	1.442	-0.0899577	-0.11987		3087	0.0288	0.0413217	*	0.212	0.0227	0.392						***	Large
23	StS1	N	T	67	76	4.912	5.692	3.28	3.555	-0.582615	-0.575685	*	3304	0.00218	0.00449625	**	0.298	0.113	0.483		**				****	Very large
24	StS10	N	T	67	76	4.445	4.739	3.3	4.807	-0.429717	-0.296107	*	2916	0.135	0.159107		0.145	-0.0366	0.316		*
25	StS11	N	T	67	76	4.191	3.321	3.073	3.038	-0.447647	-0.429757	*	3167	0.0121	0.0190143	*	0.244	0.0552	0.429		*
26	StS12	N	T	67	76	2.579	4.097	1.768	2.205	-0.544693	-0.506711	*	3050	0.0417	0.0573375		0.198	0.0064	0.389		*
27	StS13	N	T	67	76	4.665	3.705	3.718	3.014	-0.32735	-0.253784	*	2929	0.122	0.154846		0.15	-0.0467	0.348		*
28	StS2	N	T	67	76	10.818	5.995	9.344	5.551	-0.211322	-0.3212	*	3256	0.0041	0.00795882	**	0.279	0.0879	0.459		**
29	StS3	N	T	67	76	24.042	14.353	32.341	18.864	0.427807	0.363211	*	1642	0.000257	0.00081	***	-0.355	-0.52	-0.166		**
30	StS4	N	T	67	76	15.629	13.794	21.328	11.747	0.448523	0.515865	*	1532	4.13e-05	0.000151433	***	-0.398	-0.572	-0.212		**
31	StS6	N	T	67	76	3.668	5.889	2.963	4.519	-0.307935	-0.459376	*	2918	0.133	0.159107		0.146	-0.0369	0.329		*
32	StS7	N	T	67	76	4.984	5.593	4.531	5.77	-0.137475	-0.112344		2669	0.62	0.639375		0.0483	-0.138	0.247
33	StS8	N	T	67	76	4.695	5.413	2.567	4.359	-0.871042	-0.919837	*	3385	0.000694	0.00176169	**	0.33	0.154	0.494		**

## Sheet: Data S2E
Data S2E. Results of the statistical calculations - present/absent approach in urine (Fisher’s exact test).
ST 5	N	T		ST 9	N	T
Present	24	28		Present	8	20
Absent	43	48		Absent	59	56
p-value Fisher's exact test	1			p-value Fisher's exact test	0.03574
Odds ratio; 95% CI	1	0.5-2.0		Odds ratio; 95% CI	0.4	0.1-0.996
FDR	1			FDR	0.048
SHexCer 38:1;O2	N	T		SHexCer 38:1;O3	N	T		SHexCer 36:1;O3	N	T
Present	48	34		Present	53	38		Present	24	7
Absent	19	42		Absent	14	38		Absent	43	69
p-value Fisher's exact test	0.001337			p-value Fisher's exact test	0.0004434			p-value Fisher's exact test	0.0001802
Odds ratio; 95% CI	3.1	1.5-6.7		Odds ratio; 95% CI	3.7	1.7-8.6		Odds ratio; 95% CI	5.4	2.1-16.3
FDR	0.003033			FDR	0.001232			FDR	0.00063
SHexCer 41:2;O2	N	T		SHexCer 40:2;O3	N	T		SHexCer 42:3;O2	N	T
Present	19	9		Present	35	16		Present	9	18
Absent	48	67		Absent	32	60		Absent	58	58
p-value Fisher's exact test	0.01929			p-value Fisher's exact test	0.0001188			p-value Fisher's exact test	0.1375
Odds ratio; 95% CI	2.9	1.1-8.0		Odds ratio; 95% CI	4.1	1.9-9.1		Odds ratio; 95% CI	0.5	0.2-1.3
FDR	0.0266			FDR	0.00048			FDR	0.17043
SHexCer 41:2;O3	N	T		SHexCer 42:3;O3	N	T		SHexCer 43:2;O3	N	T
Present	40	20		Present	14	4		Present	19	7
Absent	27	56		Absent	53	72		Absent	48	69
p-value Fisher's exact test	8.181e-05			p-value Fisher's exact test	0.005628			p-value Fisher's exact test	0.00427
Odds ratio; 95% CI	4.1	1.9-9.0		Odds ratio; 95% CI	4.7	1.4-20.7		Odds ratio; 95% CI	3.9	1.4-11.8
FDR	0.00042			FDR	0.009224			FDR	0.007525
SHexCer 43:1;O3	N	T		SHexCer 43:1;O4	N	T		SHexCer 43:0;O4	N	T
Present	38	20		Present	13	2		Present	33	17
Absent	29	56		Absent	54	74		Absent	34	59
p-value Fisher's exact test	0.0003118			p-value Fisher's exact test	0.001687			p-value Fisher's exact test	0.0008837
Odds ratio; 95% CI	3.6	1.7-7.9		Odds ratio; 95% CI	8.8	1.9-83.6		Odds ratio; 95% CI	3.3	1.5-7.4
FDR	0.0009644			FDR	0.0036615			FDR	0.00224
SHex2Cer 34:1;O3	N	T		SHex2Cer 36:1;O2	N	T		SHex2Cer 38:1;O2	N	T
Present	10	1		Present	6	13		Present	26	29
Absent	57	75		Absent	61	63		Absent	41	47
p-value Fisher's exact test	0.002995			p-value Fisher's exact test	0.2171			p-value Fisher's exact test	1
Odds ratio; 95% CI	13	1.8-576.8		Odds ratio; 95% CI	0.5	0.1-1.5		Odds ratio; 95% CI	1	0.5-2.1
FDR	0.006			FDR	0.2464			FDR	1
SHex2Cer 38:1;O3	N	T		SHex2Cer 40:2;O2	N	T		SHex2Cer 41:1;O2	N	T
Present	6	2		Present	12	16		Present	0	7
Absent	61	74		Absent	55	60		Absent	67	69
p-value Fisher's exact test	0.147			p-value Fisher's exact test	0.6776			p-value Fisher's exact test	0.01462
Odds ratio; 95% CI	3.6	0.6-37.8		Odds ratio; 95% CI	0.8	0.3-2.0		Odds ratio; 95% CI	0	0.0-0.8
FDR	0.175			FDR	0.73231			FDR	0.02211
SHex2Cer 40:1;O3	N	T		SHex2Cer 42:3;O2	N	T		SHex2Cer 41:1;O3	N	T
Present	42	21		Present	3	10		Present	12	3
Absent	25	55		Absent	64	66		Absent	55	73
p-value Fisher's exact test	4.29e-05			p-value Fisher's exact test	0.08588			p-value Fisher's exact test	0.01162
Odds ratio; 95% CI	4.4	2.1-9.5		Odds ratio; 95% CI	0.3	0.1-1.3		Odds ratio; 95% CI	5.3	1.3-30.4
FDR	0.000392			FDR	0.1095			FDR	0.01867
SHex2Cer 40:0;O4	N	T		SHex2Cer 42:2;O3	N	T		SHex2Cer 42:1;O3	N	T
Present	42	15		Present	30	16		Present	43	23
Absent	25	61		Absent	37	60		Absent	24	53
p-value Fisher's exact test	1.885e-07			p-value Fisher's exact test	0.003863			p-value Fisher's exact test	5.585e-05
Odds ratio; 95% CI	6.7	3.0-15.6		Odds ratio; 95% CI	3	1.4-6.8		Odds ratio; 95% CI	4.1	1.9-8.8
FDR	2.66e-06			FDR	0.00728			FDR	0.000392
SHex2Cer 41:0;O4	N	T		SHex2Cer 42:0;O4	N	T
Present	25	7		Present	41	14
Absent	42	69		Absent	26	62
p-value Fisher's exact test	9.035e-05			p-value Fisher's exact test	1.64e-07
Odds ratio; 95% CI	5.8	2.2-17.3		Odds ratio; 95% CI	6.9	3.1-16.1
FDR	0.00042			FDR	2.66e-06

## Sheet: Data S2F
Data S2F. Comparison of relative concentrations of lipids in RCC plasma samples of controls, patients with early tumor stage (T1-2), and RCC patients withmore advanced tumor stage (T3-4). Kruskal-Wallis test was applied, followed by the Conover posthoc test.
No.	Lipid species	group 1	group 2	group 3	n1	n2	n3	median N	IQR N	median T1-2	IQR T1-2	median T3-4	IQR T3-4	Test statistic Kruskal-Wallis	df	p.val	FDR	FDR significance	KW significance	Conover posthoc test**	Effect size [epsilon squared]	Lower 95% CI	Upper 95% CI	Effect size significance	Overall significance				Overall significance
1	SHexCer 34:1;O2	N	T1-2	T3-4	207	90	50	16.928	3.804	16.085	4.938	17.605	4.949	6.70275	2	0.035	0.0444231	*		T1-2&T3-4	0.02	0.00192	0.06				FDR significance (KW test)
2	SHexCer 34:1;O3	N	T1-2	T3-4	207	90	50	31.459	4.23	31.276	7.125	33.086	6.822	2.33413	2	0.311	0.366536				0.00675	0.000266	0.04				0.05-0.01	*	-
3	SHexCer 40:1;O2	N	T1-2	T3-4	207	90	50	3.236	1.161	2.542	1.469	2.255	1.22	32.5051	2	8.74e-08	1.69659e-07	****	*	N&T1-2; N&T3-4	0.09	0.04	0.16	*	**		0.01-0.001	**	*
4	SHexCer 40:1;O3	N	T1-2	T3-4	207	90	50	7.788	1.613	7.206	2.124	6.022	3.421	49.292	2	1.98e-11	8.1675e-11	****	*	N&T1-2; N&T3-4; T1-2&T3-4	0.14	0.08	0.23	*	**		0.001-0.0001	***
5	SHexCer 40:2;O3	N	T1-2	T3-4	207	90	50	1.586	0.769	1.464	0.748	1.483	0.775	0.635834	2	0.728	0.728				0.00184	0.00035	0.03				0.0001 and lower	****
6	SHexCer 41:1;O3	N	T1-2	T3-4	207	90	50	5.741	1.457	4.45	1.747	3.367	1.852	99.4584	2	2.53e-22	4.1745e-21	****	*	N&T1-2; N&T3-4; T1-2&T3-4	0.29	0.19	0.37	*	**
7	SHexCer 42:1;O2	N	T1-2	T3-4	207	90	50	2.273	0.932	2.208	1.502	2.338	1.252	1.78102	2	0.41	0.466552				0.00515	0.000244	0.04
8	SHexCer 42:1;O3	N	T1-2	T3-4	207	90	50	9.624	1.594	9.289	1.851	7.828	3.775	33.3371	2	5.77e-08	1.2694e-07	****	*	N&T3-4; T1-2&T3-4	0.1	0.05	0.18	*	**		Effect size significance
9	SHexCer 42:2;O2	N	T1-2	T3-4	207	90	50	5.482	1.822	5.96	2.588	7.503	4.775	35.8398	2	1.65e-08	3.88929e-08	****	*	N&T1-2; N&T3-4; T1-2&T3-4	0.1	0.05	0.18	*	**
10	SHexCer 42:2;O3	N	T1-2	T3-4	207	90	50	12.298	2.101	13.541	3.715	12.813	3.607	17.4781	2	0.00016	0.000251429	***	*	N&T1-2; T1-2&T3-4	0.05	0.01	0.12	*	**		0.00 - 0.01	Negligible	-
11	SHexCer 42:3;O2	N	T1-2	T3-4	207	90	50	1.525	0.99	1.684	1.208	2.382	2.408	36.8712	2	9.85e-09	2.52831e-08	****	*	N&T1-2; N&T3-4; T1-2&T3-4	0.11	0.05	0.18	*	**		0.01 - 0.04	Weak
12	SHexCer 42:3;O3	N	T1-2	T3-4	207	90	50	1.206	0.699	1.329	0.82	1.683	1.076	16.7999	2	0.000225	0.0003375	***	*	N&T1-2; N&T3-4	0.05	0.01	0.1	*	**		0.04 - 0.16	Moderate	*
13	SM 32:1;O2	N	T1-2	T3-4	207	90	50	2.238	0.567	1.816	0.581	1.83	0.699	65.724	2	5.35e-15	4.41375e-14	****	*	N&T1-2; N&T3-4	0.19	0.13	0.28	*	**		0.16 - 0.36	Relatively strong	*
14	SM 33:1;O2	N	T1-2	T3-4	207	90	50	1.442	0.361	1.117	0.369	1.14	0.464	65.011	2	7.64e-15	5.0424e-14	****	*	N&T1-2; N&T3-4	0.19	0.13	0.3	*	**		0.36 - 0.64	Strong	**
15	SM 34:0;O2	N	T1-2	T3-4	207	90	50	1.295	0.275	1.24	0.272	1.203	0.28	10.6499	2	0.00487	0.00669625	**	*	N&T3-4	0.03	0.00617	0.08		*		0.64 - 1.00	Very strong	***
16	SM 34:1;O2	N	T1-2	T3-4	207	90	50	33.82	3.884	35.53	4.209	36.368	5.341	26.6246	2	1.65e-06	3.025e-06	****	*	N&T1-2; N&T3-4	0.08	0.04	0.15	*	**
17	SM 34:2;O2	N	T1-2	T3-4	207	90	50	2.81	0.639	2.845	0.668	2.82	0.769	1.68541	2	0.431	0.4741				0.00487	0.00041	0.04
18	SM 35:1;O2	N	T1-2	T3-4	207	90	50	1.252	0.27	1.118	0.219	1.143	0.249	32.7549	2	7.72e-08	1.59225e-07	****	*	N&T1-2; N&T3-4	0.09	0.05	0.17	*	**		Total significance:		*	Small
19	SM 36:0;O2	N	T1-2	T3-4	207	90	50	0.217	0.158	0.204	0.153	0.238	0.252	1.20036	2	0.549	0.566156				0.00347	0.000338	0.03						**	Medium
20	SM 36:1;O2	N	T1-2	T3-4	207	90	50	6.053	1.246	6.193	1.509	6.867	1.653	19.7616	2	5.11e-05	8.4315e-05	****	*	N&T3-4; T1-2&T3-4	0.06	0.02	0.11	*	**				***	Large
21	SM 36:2;O2	N	T1-2	T3-4	207	90	50	1.88	0.568	1.928	0.675	1.978	0.756	2.37988	2	0.304	0.366536				0.00688	0.00029	0.04						****	Very large
22	SM 37:1;O2	N	T1-2	T3-4	207	90	50	0.749	0.179	0.625	0.189	0.672	0.196	36.85	2	9.96e-09	2.52831e-08	****	*	N&T1-2, N&T3-4; T1-2&T3-4	0.11	0.06	0.18	*	**
23	SM 38:1;O2	N	T1-2	T3-4	207	90	50	4.157	0.814	3.825	0.575	3.688	0.699	37.2156	2	8.29e-09	2.487e-08	****	*	N&T1-2; N&T3-4	0.11	0.06	0.18	*	**		Posthoc Nemenyi*	Correction for ties (all 33)
24	SM 38:2;O2	N	T1-2	T3-4	207	90	50	1.34	0.368	1.309	0.369	1.313	0.414	1.36755	2	0.505	0.537581				0.00395	0.000472	0.04				Posthoc Conover**	Correction for ties (all 33), FDR correction for pvalues
25	SM 39:1;O2	N	T1-2	T3-4	207	90	50	1.35	0.345	0.993	0.394	0.901	0.375	109.592	2	1.59e-24	5.247e-23	****	*	N&T1-2; N&T3-4	0.32	0.24	0.41	*	**
26	SM 40:1;O2	N	T1-2	T3-4	207	90	50	7.737	1.344	7.411	1.443	6.627	1.724	37.7647	2	6.3e-09	2.079e-08	****	*	N&T1-2; N&T3-4; T1-2&T3-4	0.11	0.05	0.2	*	**
27	SM 40:2;O2	N	T1-2	T3-4	207	90	50	4.557	0.732	4.177	0.676	3.886	0.916	39.7188	2	2.37e-09	8.69e-09	****	*	N&T1-2; N&T3-4; T1-2&T3-4	0.11	0.06	0.19	*	**
28	SM 41:1;O2	N	T1-2	T3-4	207	90	50	3.257	0.643	2.762	0.681	2.339	0.74	91.0805	2	1.67e-20	1.837e-19	****	*	N&T1-2; N&T3-4; T1-2&T3-4	0.26	0.18	0.34	*	**
29	SM 41:2;O2	N	T1-2	T3-4	207	90	50	2.151	0.416	1.886	0.464	1.706	0.453	54.4684	2	1.49e-12	7.02429e-12	****	*	N&T1-2; N&T3-4; T1-2&T3-4	0.16	0.1	0.25	*	**
30	SM 42:1;O2	N	T1-2	T3-4	207	90	50	4.914	1.013	4.714	1.121	4.008	1.756	26.0187	2	2.24e-06	3.89053e-06	****	*	N&T1-2; N&T3-4; T1-2&T3-4	0.08	0.02	0.15	*	**
31	SM 42:2;O2	N	T1-2	T3-4	207	90	50	13.245	2.285	14.843	2.707	15.145	2.518	56.0358	2	6.79e-13	3.7345e-12	****	*	N&T1-2; N&T3-4	0.16	0.09	0.25	*	**
32	SM 42:3;O2	N	T1-2	T3-4	207	90	50	4.579	1.159	4.915	1.166	4.788	1.511	10.3921	2	0.00554	0.0073128	**	*	N&T1-2	0.03	0.00783	0.09		*
33	SM 43:2;O2	N	T1-2	T3-4	207	90	50	0.588	0.259	0.486	0.251	0.583	0.328	14.272	2	0.000796	0.00114209	**	*	N&T1-2	0.04	0.01	0.11	*	**

## Sheet: Data S2G
Data S2G. Comparison of relative concentrations of lipids in plasma samples of controls, RCC patients with G1-2 cancer tumor grade, and RCC patients with G3-4 tumor grade. Kruskal-Wallis test was applied, followed by the Conover posthoc test.
No.	Lipid species	group 1	group 2	group 3	n1	n2	n3	median N	IQR N	median G1-2	IQR G1-2	median G3-4	IQR G3-4	Test statistic Kruskal-Wallis	df	p.val	FDR	FDR significance	KW significance	Conover posthoc test**	Effect size [epsilon squared]	Lower 95% CI	Upper 95% CI	Effect size significance	Overall significance				Overall significance
1	SHexCer 34:1;O2	N	G1-2	G3-4	207	76	47	16.928	3.804	16.35	5.866	16.919	5.114	1.01897	2	0.601	0.619781				0.0031	0.000278	0.04				FDR significance (KW test)
2	SHexCer 34:1;O3	N	G1-2	G3-4	207	76	47	31.459	4.23	31.782	6.101	33.295	6.974	4.54409	2	0.103	0.125889				0.01	0.00157	0.07				0.05-0.01	*	-
3	SHexCer 40:1;O2	N	G1-2	G3-4	207	76	47	3.236	1.161	2.409	1.389	2.345	1.545	29.1096	2	4.77e-07	8.745e-07	****	*	N&G1-2; N&G3-4	0.09	0.03	0.17	*	**		0.01-0.001	**	*
4	SHexCer 40:1;O3	N	G1-2	G3-4	207	76	47	7.788	1.613	7.14	2.323	6.023	3.55	54.5413	2	1.43e-12	7.865e-12	****	*	N&G1-2; N&G3-4; G1-2&G3-4	0.17	0.11	0.24	*	**		0.001-0.0001	***
5	SHexCer 40:2;O3	N	G1-2	G3-4	207	76	47	1.586	0.769	1.469	0.71	1.512	1.172	0.568831	2	0.752	0.752				0.00173	4.83e-05	0.02				0.0001 and lower	****
6	SHexCer 41:1;O3	N	G1-2	G3-4	207	76	47	5.741	1.457	4.38	1.664	3.33	1.937	101.609	2	8.63e-23	1.42395e-21	****	*	N&G1-2; N&G3-4; G1-2&G3-4	0.31	0.23	0.4	*	**
7	SHexCer 42:1;O2	N	G1-2	G3-4	207	76	47	2.273	0.932	2.186	1.317	2.35	1.469	1.23647	2	0.539	0.573774				0.00376	0.000243	0.04
8	SHexCer 42:1;O3	N	G1-2	G3-4	207	76	47	9.624	1.594	9.289	1.9	6.98	4.134	40.7926	2	1.39e-09	4.587e-09	****	*	N&G1-2; N&G3-4; G1-2&G3-4	0.12	0.07	0.21	*	**		Effect size significance
9	SHexCer 42:2;O2	N	G1-2	G3-4	207	76	47	5.482	1.822	5.907	2.726	7.375	4.383	37.1876	2	8.41e-09	2.13485e-08	****	*	N&G1-2; N&G3-4; G1-2&G3-4	0.11	0.06	0.18	*	**
10	SHexCer 42:2;O3	N	G1-2	G3-4	207	76	47	12.298	2.101	13.47	3.448	12.551	3.769	15.7414	2	0.000382	0.000573	***	*	N&G1-2; G1-2&G3-4	0.05	0.01	0.12	*	**		0.00 - 0.01	Negligible	-
11	SHexCer 42:3;O2	N	G1-2	G3-4	207	76	47	1.525	0.99	1.672	1.268	2.476	2.535	39.1355	2	3.18e-09	8.745e-09	****	*	N&G1-2; N&G3-4; G1-2&G3-4	0.12	0.07	0.19	*	**		0.01 - 0.04	Weak
12	SHexCer 42:3;O3	N	G1-2	G3-4	207	76	47	1.206	0.699	1.344	0.862	1.497	1.097	14.379	2	0.000754	0.00108183	**	*	N&G1-2; N&G3-4	0.04	0.0044	0.1	*	**		0.04 - 0.16	Moderate	*
13	SM 32:1;O2	N	G1-2	G3-4	207	76	47	2.238	0.567	1.834	0.592	1.71	0.685	61.1047	2	5.39e-14	4.44675e-13	****	*	N&G1-2; N&G3-4	0.19	0.13	0.28	*	**		0.16 - 0.36	Relatively strong	*
14	SM 33:1;O2	N	G1-2	G3-4	207	76	47	1.442	0.361	1.098	0.395	1.176	0.462	59.1438	2	1.44e-13	9.504e-13	****	*	N&G1-2; N&G3-4	0.18	0.1	0.26	*	**		0.36 - 0.64	Strong	**
15	SM 34:0;O2	N	G1-2	G3-4	207	76	47	1.295	0.275	1.23	0.232	1.226	0.306	9.16691	2	0.0102	0.014025	*		N&G1-2; N&G3-4	0.03	0.0037	0.08				0.64 - 1.00	Very strong	***
16	SM 34:1;O2	N	G1-2	G3-4	207	76	47	33.82	3.884	35.757	4.814	35.848	4.034	24.4359	2	4.94e-06	8.151e-06	****	*	N&G1-2; N&G3-4	0.07	0.03	0.13	*	**
17	SM 34:2;O2	N	G1-2	G3-4	207	76	47	2.81	0.639	2.824	0.734	2.868	0.742	1.82301	2	0.402	0.457448				0.00554	0.000588	0.05
18	SM 35:1;O2	N	G1-2	G3-4	207	76	47	1.252	0.27	1.11	0.198	1.173	0.25	36.9148	2	9.64e-09	2.27229e-08	****	*	N&G1-2; N&G3-4; G1-2&G3-4	0.11	0.05	0.18	*	**		Total significance:		*	Small
19	SM 36:0;O2	N	G1-2	G3-4	207	76	47	0.217	0.158	0.206	0.176	0.22	0.214	1.43083	2	0.489	0.5379				0.00435	0.000115	0.04						**	Medium
20	SM 36:1;O2	N	G1-2	G3-4	207	76	47	6.053	1.246	6.15	1.443	6.969	1.646	26.2808	2	1.96e-06	3.40421e-06	****	*	N&G3-4; G1-2&G3-4	0.08	0.03	0.14	*	**				***	Large
21	SM 36:2;O2	N	G1-2	G3-4	207	76	47	1.88	0.568	1.915	0.657	2.036	0.831	6.9576	2	0.0308	0.0390923	*		N&G3-4; G1-2&G3-4	0.02	0.00292	0.07						****	Very large
22	SM 37:1;O2	N	G1-2	G3-4	207	76	47	0.749	0.179	0.619	0.155	0.739	0.176	44.8507	2	1.82e-10	6.67333e-10	****	*	N&G1-2; G1-2&G3-4	0.14	0.08	0.22	*	**
23	SM 38:1;O2	N	G1-2	G3-4	207	76	47	4.157	0.814	3.825	0.625	3.711	0.717	33.2133	2	6.14e-08	1.19188e-07	****	*	N&G1-2; N&G3-4	0.1	0.04	0.18	*	**		Posthoc Nemenyi*	Correction for ties (all 33)
24	SM 38:2;O2	N	G1-2	G3-4	207	76	47	1.34	0.368	1.288	0.406	1.397	0.382	2.32587	2	0.313	0.368893				0.00707	0.000623	0.05				Posthoc Conover**	Correction for ties (all 33), FDR correction for pvalues
25	SM 39:1;O2	N	G1-2	G3-4	207	76	47	1.35	0.345	0.944	0.428	0.921	0.394	102.537	2	5.42e-23	1.42395e-21	****	*	N&G1-2; N&G3-4	0.31	0.24	0.4	*	**
26	SM 40:1;O2	N	G1-2	G3-4	207	76	47	7.737	1.344	7.364	1.573	6.598	1.325	40.5287	2	1.58e-09	4.74e-09	****	*	N&G1-2; N&G3-4; G1-2&G3-4	0.12	0.06	0.22	*	**
27	SM 40:2;O2	N	G1-2	G3-4	207	76	47	4.557	0.732	4.112	0.77	3.924	0.867	36.2557	2	1.34e-08	2.948e-08	****	*	N&G1-2; N&G3-4	0.11	0.06	0.18	*	**
28	SM 41:1;O2	N	G1-2	G3-4	207	76	47	3.257	0.643	2.75	0.746	2.35	0.615	90.1255	2	2.69e-20	2.959e-19	****	*	N&G1-2; N&G3-4; G1-2&G3-4	0.27	0.17	0.37	*	**
29	SM 41:2;O2	N	G1-2	G3-4	207	76	47	2.151	0.416	1.837	0.513	1.793	0.321	50.6341	2	1.01e-11	4.76143e-11	****	*	N&G1-2; N&G3-4	0.15	0.1	0.22	*	**
30	SM 42:1;O2	N	G1-2	G3-4	207	76	47	4.914	1.013	4.722	1.15	3.943	1.357	35.4047	2	2.05e-08	4.22813e-08	****	*	N&G3-4; G1-2&G3-4	0.11	0.05	0.19	*	**
31	SM 42:2;O2	N	G1-2	G3-4	207	76	47	13.245	2.285	14.756	2.885	15.111	1.956	49.2206	2	2.05e-11	8.45625e-11	****	*	N&G1-2; N&G3-4	0.15	0.07	0.22	*	**
32	SM 42:3;O2	N	G1-2	G3-4	207	76	47	4.579	1.159	4.915	1.462	4.886	1.185	8.95392	2	0.0114	0.015048	*		N&G1-2; N&G3-4	0.03	0.00337	0.08
33	SM 43:2;O2	N	G1-2	G3-4	207	76	47	0.588	0.259	0.454	0.311	0.587	0.318	17.393	2	0.000167	0.000262429	***	*	N&G1-2; G1-2&G3-4	0.05	0.01	0.13	*	**

## Sheet: Data S2H
Data S2H. Comparison of relative concentrations of lipids in urine samples of controls, RCC patients with early tumor stage (T1-2), and RCC patients with more advanced tumor stage (T3-4). Kruskal-Wallis test was applied, followed by the Conover posthoc test.
No.	Lipid species	group 1	group 2	group 3	n1	n2	n3	median N	IQR N	median T1-2	IQR T1-2	median T3-4	IQR T3-4	Test statistic Kruskal-Wallis	df	p.val	FDR	FDR significance	KW significance	Conover posthoc test**	Effect size [epsilon squared]	Lower 95% CI	Upper 95% CI	Effect size significance	Overall significance				Overall significance
1	SHex2Cer 34:1;O2	N	T1-2	T3-4	67	45	31	1.052	0.738	1.43	1.156	1.834	1.829	12.4892	2	0.00194	0.004268	**	*	N&T1-2; N&T3-4	0.09	0.03	0.21	*	**		FDR significance (KW test)
2	SHex2Cer 40:1;O2	N	T1-2	T3-4	67	45	31	1.494	0.941	1.784	1.909	3.13	2.577	30.4804	2	2.41e-07	1.5906e-06	****	*	N&T1-2; N&T3-4; T1-2&T3-4	0.21	0.11	0.34	*	**		0.05-0.01	*	-
3	SHex2Cer 42:1;O2	N	T1-2	T3-4	67	45	31	1.471	1.128	2.039	2.723	3.551	3.595	32.9235	2	7.09e-08	5.84925e-07	****	*	N&T1-2; N&T3-4; T1-2&T3-4	0.23	0.12	0.4	*	**		0.01-0.001	**	*
4	SHex2Cer 42:2;O2	N	T1-2	T3-4	67	45	31	1.379	1.225	2.279	2.2	3.365	3.681	39.6967	2	2.4e-09	6.4845e-08	****	*	N&T1-2; N&T3-4; T1-2&T3-4	0.28	0.17	0.39	*	**		0.001-0.0001	***
5	SHexCer 34:1;O2	N	T1-2	T3-4	67	45	31	3.63	1.542	3.316	1.389	3.483	2.167	0.483753	2	0.785	0.809531				0.00341	0.000835	0.07				0.0001 and lower	****
6	SHexCer 34:1;O3	N	T1-2	T3-4	67	45	31	2.252	1.091	1.746	1.3	1.671	1.217	7.87169	2	0.0195	0.0279783	*		N&T3-4	0.06	0.00692	0.19	*	*
7	SHexCer 40:0;O3	N	T1-2	T3-4	67	45	31	4.088	0.691	3.616	1.079	3.616	1.289	11.1455	2	0.0038	0.00705833	**	*	N&T1-2; N&T3-4	0.08	0.02	0.17	*	**
8	SHexCer 40:0;O4	N	T1-2	T3-4	67	45	31	4.434	1.276	3.58	1.102	3.3	2.005	26.8655	2	1.47e-06	6.93e-06	****	*	N&T1-2; N&T3-4	0.19	0.1	0.34	*	**		Effect size significance
9	SHexCer 40:1;O2	N	T1-2	T3-4	67	45	31	6.856	1.272	6.472	1.083	6.176	1.248	6.89445	2	0.0318	0.043725	*		N&T3-4	0.05	0.00472	0.18	*	*
10	SHexCer 40:1;O3	N	T1-2	T3-4	67	45	31	7.274	1.427	6.625	1.363	6.035	1.966	36.2497	2	1.34e-08	1.474e-07	****	*	N&T1-2; N&T3-4; T1-2&T3-4	0.26	0.17	0.42	*	**		0.00 - 0.01	Negligible	-
11	SHexCer 40:2;O2	N	T1-2	T3-4	67	45	31	0.961	0.504	0.952	0.403	1.168	0.59	2.91924	2	0.232	0.264				0.02	0.000626	0.11				0.01 - 0.04	Weak
12	SHexCer 41:0;O3	N	T1-2	T3-4	67	45	31	2.652	0.648	2.288	0.738	2.262	0.911	12.5092	2	0.00192	0.004268	**	*	N&T1-2; N&T3-4	0.09	0.01	0.21	*	**		0.04 - 0.16	Moderate	*
13	SHexCer 41:0;O4	N	T1-2	T3-4	67	45	31	4.879	1.207	4.295	1.135	4.019	1.977	23.3213	2	8.63e-06	3.55987e-05	****	*	N&T1-2; N&T3-4; T1-2&T3-4	0.16	0.09	0.27	*	**		0.16 - 0.36	Relatively strong	*
14	SHexCer 41:1;O2	N	T1-2	T3-4	67	45	31	3.493	0.686	3.513	1.025	3.172	0.914	4.83895	2	0.089	0.112962				0.03	0.00394	0.12				0.36 - 0.64	Strong	**
15	SHexCer 41:1;O3	N	T1-2	T3-4	67	45	31	8.153	1.112	7.586	1.439	6.739	1.319	38.7107	2	3.93e-09	6.4845e-08	****	*	N&T1-2; N&T3-4; T1-2&T3-4	0.27	0.17	0.42	*	**		0.64 - 1.00	Very strong	***
16	SHexCer 42:0;O3	N	T1-2	T3-4	67	45	31	3.478	0.937	3.512	1.204	3.403	1.043	2.09604	2	0.351	0.373645				0.01	0.000671	0.1
17	SHexCer 42:0;O4	N	T1-2	T3-4	67	45	31	9.802	2.125	9.226	2.847	8.22	3.096	12.9472	2	0.00154	0.00390923	**	*	N&T3-4; T1-2&T3-4	0.09	0.03	0.23	*	**
18	SHexCer 42:1;O2	N	T1-2	T3-4	67	45	31	5.297	1.298	6.135	1.999	6.562	1.781	14.943	2	0.000569	0.001707	**	*	N&T1-2; N&T3-4	0.11	0.05	0.24	*	**		Total significance:		*	Small
19	SHexCer 42:1;O3	N	T1-2	T3-4	67	45	31	14.302	2.058	14.713	3.23	12.707	3.101	11.1172	2	0.00385	0.00705833	**	*	N&T3-4; T1-2&T3-4	0.08	0.01	0.22	*	**				**	Medium
20	SHexCer 42:1;O4	N	T1-2	T3-4	67	45	31	3.71	1.26	3.248	1.163	2.832	1.252	9.37713	2	0.0092	0.0159789	*		N&T3-4	0.07	0.02	0.17	*	*				***	Large
21	SHexCer 42:2;O2	N	T1-2	T3-4	67	45	31	2.167	0.955	2.585	1.732	3.532	3.042	27.0471	2	1.34e-06	6.93e-06	****	*	N&T1-2; N&T3-4; T1-2&T3-4	0.19	0.1	0.33	*	**				****	Very large
22	SHexCer 42:2;O3	N	T1-2	T3-4	67	45	31	5.426	1.751	5.271	1.431	4.7	1.418	8.10891	2	0.0173	0.02595	*		N&T3-4	0.06	0.01	0.16	*	*
23	StS1	N	T1-2	T3-4	67	45	31	4.912	5.692	3.098	2.987	3.655	3.916	11.6021	2	0.00302	0.00622875	**	*	N&T1-2	0.08	0.02	0.21	*	**		Posthoc Nemenyi*	Correction for ties (all 33)
24	StS10	N	T1-2	T3-4	67	45	31	4.445	4.739	3.909	4.593	2.873	4.608	2.66823	2	0.263	0.2893				0.02	0.00176	0.13				Posthoc Conover**	Correction for ties (all 33), FDR correction for pvalues
25	StS11	N	T1-2	T3-4	67	45	31	4.191	3.321	3.355	2.866	2.677	2.226	8.65487	2	0.0132	0.02178	*		N&T3-4	0.06	0.01	0.18	*	*
26	StS12	N	T1-2	T3-4	67	45	31	2.579	4.097	2.423	2.913	1.617	1.555	6.76165	2	0.034	0.04488	*		N&T3-4	0.05	0.0058	0.13	*	*
27	StS13	N	T1-2	T3-4	67	45	31	4.665	3.705	3.835	3.631	3.627	2.376	3.5082	2	0.173	0.203893				0.02	0.0019	0.13
28	StS2	N	T1-2	T3-4	67	45	31	10.818	5.995	8.886	5.705	9.702	3.914	8.35522	2	0.0153	0.0240429	*		N&T1-2	0.06	0.00484	0.18	*	*
29	StS3	N	T1-2	T3-4	67	45	31	24.042	14.353	27.978	14.991	36.026	20.426	18.4099	2	0.000101	0.000370333	***	*	N&T1-2; N&T3-4; T1-2&T3-4	0.13	0.04	0.27	*	**
30	StS4	N	T1-2	T3-4	67	45	31	15.629	13.794	20.659	12.351	21.415	9.399	16.8273	2	0.000222	0.0007326	***	*	N&T1-2; N&T3-4	0.12	0.04	0.23	*	**
31	StS6	N	T1-2	T3-4	67	45	31	3.668	5.889	3.48	6.62	1.841	3.563	4.6703	2	0.0968	0.118311				0.03	0.00139	0.14
32	StS7	N	T1-2	T3-4	67	45	31	4.984	5.593	4.568	6.753	4.148	4.797	0.254576	2	0.88	0.88				0.00179	0.000435	0.06
33	StS8	N	T1-2	T3-4	67	45	31	4.695	5.413	3.015	4.005	1.753	2.633	14.7059	2	0.000641	0.00176275	**	*	N&T1-2; N&T3-4	0.1	0.02	0.2	*	**

## Sheet: Data S2I
Data S2I. Comparison of relative concentrations of lipids in urine samples of controls, RCC patients with G1-2 tumor grades, and RCC patients with G3-4 tumor grades. Kruskal-Wallis test was applied, followed by the Conover posthoc test.
No.	Lipid species	group 1	group 2	group 3	n1	n2	n3	median N	IQR N	median G1-2	IQR G1-2	median G3-4	IQR G3-4	Test statistic Kruskal-Wallis	df	p.val	FDR	FDR significance	KW significance	Conover posthoc test**	Effect size [epsilon squared]	Lower 95% CI	Upper 95% CI	Effect size significance	Overall significance				Overall significance
1	SHex2Cer 34:1;O2	N	G1-2	G3-4	67	37	34	1.052	0.738	1.409	0.982	1.771	1.79	11.0344	2	0.00402	0.00737	**	*	N&G3-4	0.08	0.02	0.2	*	**		FDR significance (KW test)
2	SHex2Cer 40:1;O2	N	G1-2	G3-4	67	37	34	1.494	0.941	2.014	1.875	3.14	2.785	32.2172	2	1.01e-07	6.666e-07	****	*	N&G1-2; N&G3-4; G1-2&G3-4	0.24	0.12	0.38	*	**		0.05-0.01	*	-
3	SHex2Cer 42:1;O2	N	G1-2	G3-4	67	37	34	1.471	1.128	2.234	1.827	3.883	3.175	33.4583	2	5.43e-08	5.973e-07	****	*	N&G1-2; N&G3-4; G1-2&G3-4	0.24	0.12	0.38	*	**		0.01-0.001	**	*
4	SHex2Cer 42:2;O2	N	G1-2	G3-4	67	37	34	1.379	1.225	2.474	2.054	3.523	3.463	37.7737	2	6.27e-09	2.0691e-07	****	*	N&G1-2; N&G3-4; G1-2&G3-4	0.28	0.14	0.43	*	**		0.001-0.0001	***
5	SHexCer 34:1;O2	N	G1-2	G3-4	67	37	34	3.63	1.542	3.437	1.958	3.29	1.585	0.708762	2	0.702	0.736313				0.00517	0.000455	0.07				0.0001 and lower	****
6	SHexCer 34:1;O3	N	G1-2	G3-4	67	37	34	2.252	1.091	1.648	1.53	1.651	0.934	9.90491	2	0.00707	0.0116655	*		N&G3-4	0.07	0.00884	0.2	*	*
7	SHexCer 40:0;O3	N	G1-2	G3-4	67	37	34	4.088	0.691	3.431	1.174	3.825	1.263	12.6756	2	0.00177	0.004048	**	*	N&G1-2; N&G3-4	0.09	0.02	0.21	*	**
8	SHexCer 40:0;O4	N	G1-2	G3-4	67	37	34	4.434	1.276	3.331	1.334	3.526	1.278	28.3814	2	6.87e-07	3.7785e-06	****	*	N&G1-2; N&G3-4	0.21	0.09	0.34	*	**		Effect size significance
9	SHexCer 40:1;O2	N	G1-2	G3-4	67	37	34	6.856	1.272	6.472	0.98	6.494	1.373	4.42511	2	0.109	0.138346				0.03	0.00267	0.14
10	SHexCer 40:1;O3	N	G1-2	G3-4	67	37	34	7.274	1.427	6.437	1.451	6.171	1.994	32.8241	2	7.45e-08	6.14625e-07	****	*	N&G1-2; N&G3-4; G1-2&G3-4	0.24	0.12	0.39	*	**		0.00 - 0.01	Negligible	-
11	SHexCer 40:2;O2	N	G1-2	G3-4	67	37	34	0.961	0.504	0.917	0.376	1.187	0.702	3.93155	2	0.14	0.171111				0.03	0.00394	0.12				0.01 - 0.04	Weak
12	SHexCer 41:0;O3	N	G1-2	G3-4	67	37	34	2.652	0.648	2.286	0.802	2.271	0.678	11.3307	2	0.00346	0.00671647	**	*	N&G1-2; N&G3-4	0.08	0.02	0.2	*	**		0.04 - 0.16	Moderate	*
13	SHexCer 41:0;O4	N	G1-2	G3-4	67	37	34	4.879	1.207	4.118	1.127	4.08	1.335	22.3342	2	1.41e-05	5.81625e-05	****	*	N&G1-2; N&G3-4	0.16	0.08	0.31	*	**		0.16 - 0.36	Relatively strong	*
14	SHexCer 41:1;O2	N	G1-2	G3-4	67	37	34	3.493	0.686	3.493	1.44	3.278	0.817	3.24786	2	0.197	0.232179				0.02	0.00275	0.11				0.36 - 0.64	Strong	**
15	SHexCer 41:1;O3	N	G1-2	G3-4	67	37	34	8.153	1.112	7.51	1.567	6.816	1.67	34.2327	2	3.69e-08	5.973e-07	****	*	N&G1-2; N&G3-4; G1-2&G3-4	0.25	0.16	0.41	*	**		0.64 - 1.00	Very strong	***
16	SHexCer 42:0;O3	N	G1-2	G3-4	67	37	34	3.478	0.937	3.497	1.371	3.467	1.03	0.674945	2	0.714	0.736313				0.00493	0.000709	0.06
17	SHexCer 42:0;O4	N	G1-2	G3-4	67	37	34	9.802	2.125	8.809	2.766	8.584	3.375	10.5796	2	0.00504	0.00875368	**	*	N&G3-4	0.08	0.03	0.18	*	**
18	SHexCer 42:1;O2	N	G1-2	G3-4	67	37	34	5.297	1.298	6.514	2.325	6.504	1.392	15.699	2	0.00039	0.00099	***	*	N&G1-2; N&G3-4	0.11	0.03	0.24	*	**		Total significance:		*	Small
19	SHexCer 42:1;O3	N	G1-2	G3-4	67	37	34	14.302	2.058	15.474	3.226	12.834	1.98	17.7918	2	0.000137	0.0004752	***	*	N&G3-4; G1-2&G3-4	0.13	0.05	0.3	*	**				**	Medium
20	SHexCer 42:1;O4	N	G1-2	G3-4	67	37	34	3.71	1.26	3.162	1.217	2.828	1.253	12.184	2	0.00226	0.00466125	**	*	N&G1-2; N&G3-4	0.09	0.02	0.25	*	**				***	Large
21	SHexCer 42:2;O2	N	G1-2	G3-4	67	37	34	2.167	0.955	2.456	1.342	3.821	2.534	27.2949	2	1.18e-06	5.56286e-06	****	*	N&G3-4; G1-2&G3-4	0.2	0.09	0.32	*	**				****	Very large
22	SHexCer 42:2;O3	N	G1-2	G3-4	67	37	34	5.426	1.751	5.427	0.969	4.423	1.27	17.4466	2	0.000163	0.000489	***	*	N&G3-4; G1-2&G3-4	0.13	0.04	0.25	*	**
23	StS1	N	G1-2	G3-4	67	37	34	4.912	5.692	3.257	3.648	3.274	3.84	9.42402	2	0.00899	0.013485	*		N&G1-2; N&G3-4	0.07	0.00713	0.21	*	*		Posthoc Nemenyi*	Correction for ties (all 33)
24	StS10	N	G1-2	G3-4	67	37	34	4.445	4.739	2.998	5.356	3.667	5.026	2.2689	2	0.322	0.3542				0.02	0.00167	0.1				Posthoc Conover**	Correction for ties (all 33), FDR correction for pvalues
25	StS11	N	G1-2	G3-4	67	37	34	4.191	3.321	2.905	2.166	2.973	2.929	8.75772	2	0.0125	0.0179348	*		N&G1-2; N&G3-4	0.06	0.02	0.17	*	*
26	StS12	N	G1-2	G3-4	67	37	34	2.579	4.097	2.423	2.977	1.624	1.729	5.80857	2	0.0548	0.072336				0.04	0.00521	0.15	*	*
27	StS13	N	G1-2	G3-4	67	37	34	4.665	3.705	3.816	3.096	3.656	2.641	3.04009	2	0.219	0.249207				0.02	0.00106	0.1
28	StS2	N	G1-2	G3-4	67	37	34	10.818	5.995	9.684	7.637	8.428	3.459	9.76604	2	0.00757	0.0118957	*		N&G3-4	0.07	0.03	0.17	*	*
29	StS3	N	G1-2	G3-4	67	37	34	24.042	14.353	28.095	20.168	35.813	19.301	16.7356	2	0.000232	0.000638	***	*	N&G1-2; N&G3-4	0.12	0.05	0.29	*	**
30	StS4	N	G1-2	G3-4	67	37	34	15.629	13.794	21.415	11.005	21.646	11.805	17.6974	2	0.000144	0.0004752	***	*	N&G1-2; N&G3-4	0.13	0.05	0.3	*	**
31	StS6	N	G1-2	G3-4	67	37	34	3.668	5.889	3.561	4.555	1.627	4.167	6.66889	2	0.0356	0.04895	*		N&G3-4	0.05	0.00498	0.16	*	*
32	StS7	N	G1-2	G3-4	67	37	34	4.984	5.593	4.16	5.324	4.976	6.034	0.390118	2	0.823	0.823				0.00285	8.71e-05	0.07
33	StS8	N	G1-2	G3-4	67	37	34	4.695	5.413	2.612	4.441	2.492	3.405	12.5984	2	0.00184	0.004048	**	*	N&G1-2; N&G3-4	0.09	0.02	0.21	*	**

[truncated: 11 more sheets: Data S2J, Data S2K, Data S2L, Data S2M, Data S2N, Data S2O, Data S2P, Data S2Q, Data S2R, Data S2S, Data S2T]
